# Supplementary material
Source: Springer Nature journal article supplement (https://www.springermedizin.de/resource/supplementary/12885_2014_4913_MOESM2_ESM.pdf/9467734)
Supplement: MOESM2 [file 9467734]

**Supplementary Table 2: Differentially expressed genes BJ3Z vs NMF (FDR<0.05)**

| Gene symbol | RefSeq                         | p-value  | t       | Mean (BJ3Z) | Mean (NMF) | MeanRatio (BJ3Z/NMF) | MeanDiff (BJ3Z-NMF) | FoldChange (BJ3Z/NMF) |
|-------------|--------------------------------|----------|---------|-------------|------------|----------------------|---------------------|-----------------------|
| Gm773       | BC147685                       | 7.26E-06 | 30.0968 | 9.88618     | 3.37658    | 91.114               | 6.5096              | 91.114                |
| Msln        | NM_018857                      | 2.25E-06 | 40.357  | 11.2595     | 5.08913    | 72.022               | 6.17037             | 72.022                |
| Xist        | NR_001463                      | 1.31E-06 | 46.2043 | 9.42412     | 3.33347    | 68.1503              | 6.09065             | 68.1503               |
| Ott         | NM_011022                      | 2.19E-06 | 40.6338 | 9.46352     | 3.58117    | 58.988               | 5.88235             | 58.988                |
| Ott         | NM_011022                      | 1.51E-06 | 44.5813 | 9.47381     | 3.59315    | 58.9189              | 5.88066             | 58.9189               |
| Gm15107     | NM_001081648                   | 3.41E-06 | 36.3759 | 9.47436     | 3.59908    | 58.6994              | 5.87527             | 58.6994               |
| Nes         | NM_016701                      | 2.45E-06 | 39.5268 | 9.88876     | 4.02924    | 58.0618              | 5.85952             | 58.0618               |
| Luzp4       | NM_001114383                   | 9.36E-07 | 50.2852 | 9.41785     | 3.60756    | 56.114               | 5.81029             | 56.114                |
| Ott         | NM_011022                      | 1.76E-06 | 42.9548 | 9.37662     | 3.59285    | 55.0917              | 5.78376             | 55.0917               |
| Ott         | NM_011022                      | 2.53E-06 | 39.2134 | 9.36843     | 3.70373    | 50.7276              | 5.6647              | 50.7276               |
| Ott         | NM_011022                      | 2.53E-06 | 39.2134 | 9.36843     | 3.70373    | 50.7276              | 5.6647              | 50.7276               |
| Gatm        | NM_025961                      | 5.68E-06 | 32      | 9.6378      | 4.05152    | 48.044               | 5.58628             | 48.044                |
| Ott         | NM_011022                      | 3.22E-06 | 36.8882 | 9.32421     | 3.73869    | 48.0187              | 5.58552             | 48.0187               |
| Ott         | NM_011022                      | 2.09E-06 | 41.1301 | 9.17178     | 3.67726    | 45.0831              | 5.49452             | 45.0831               |
| Blnk        | NM_008528                      | 1.16E-05 | 26.7438 | 9.54217     | 4.05566    | 44.8337              | 5.48651             | 44.8337               |
| Ott         | NM_011022                      | 2.89E-06 | 37.9285 | 9.17135     | 3.69852    | 44.4106              | 5.47283             | 44.4106               |
| Ott         | NM_011022                      | 2.15E-06 | 40.8193 | 8.96061     | 3.57299    | 41.8634              | 5.38762             | 41.8634               |
| Aspa        | NM_023113                      | 4.12E-05 | 19.4451 | 9.30055     | 4.15038    | 35.5105              | 5.15017             | 35.5105               |
| Cyp2c55     | NM_028089                      | 4.64E-06 | 33.6813 | 8.71073     | 3.59462    | 34.6818              | 5.11611             | 34.6818               |
| Cbr2        | NM_007621<br>ENSMUST0000011186 | 0.000518 | 10.2126 | 10.6068     | 5.62802    | 31.5325              | 4.97877             | 31.5325               |
| Gm5930      | 4                              | 4.93E-05 | 18.5856 | 8.07048     | 3.18053    | 29.6498              | 4.88995             | 29.6498               |
| Gm7609      | NM_001081746                   | 3.86E-06 | 35.2581 | 9.20729     | 4.50251    | 26.0784              | 4.70478             | 26.0784               |
| Itga3       | NM_013565                      | 9.01E-06 | 28.5052 | 9.58377     | 4.89606    | 25.7715              | 4.68771             | 25.7715               |
| Cfh         | NM_009888                      | 0.001273 | 8.08243 | 10.8113     | 6.19881    | 24.463               | 4.61253             | 24.463                |
| Gm7609      | NM_001081746                   | 1.13E-05 | 26.932  | 8.89621     | 4.37034    | 23.0367              | 4.52587             | 23.0367               |
| Gm5622      | NM_001013816                   | 4.25E-05 | 19.2926 | 7.96786     | 3.52293    | 21.7801              | 4.44494             | 21.7801               |
| Sox2        | NM_011443                      | 4.52E-05 | 19.0026 | 8.84674     | 4.40212    | 21.7753              | 4.44462             | 21.7753               |

|               |                        |          |         |         |         |         |         |         |
|---------------|------------------------|----------|---------|---------|---------|---------|---------|---------|
| Ces1f         | NM_144930              | 5.42E-05 | 18.1457 | 8.24545 | 3.83288 | 21.2969 | 4.41257 | 21.2969 |
| 2610305D13Rik | NM_145078              | 2.48E-05 | 22.0919 | 7.18163 | 2.80971 | 20.7051 | 4.37191 | 20.7051 |
| Aim2          | NM_001013779           | 5.19E-05 | 18.3524 | 8.0953  | 3.74923 | 20.3375 | 4.34607 | 20.3375 |
|               | ---                    | 1.15E-05 | 26.7948 | 9.0128  | 4.68955 | 20.0183 | 4.32325 | 20.0183 |
| Gm5622        | NM_001013816           | 0.000124 | 14.7044 | 7.86654 | 3.56164 | 19.7653 | 4.3049  | 19.7653 |
| Herc3         | NM_028705              | 1.43E-05 | 25.3822 | 9.42444 | 5.21771 | 18.4652 | 4.20673 | 18.4652 |
| Rex2          | NM_009051              | 3.09E-06 | 37.2977 | 9.20052 | 5.03243 | 17.9771 | 4.16809 | 17.9771 |
| Csprs         | NM_033616              | 2.58E-05 | 21.8771 | 8.4457  | 4.2779  | 17.9735 | 4.1678  | 17.9735 |
| Klhl30        | NM_027551              | 8.10E-05 | 16.3944 | 8.89642 | 4.74162 | 17.8123 | 4.1548  | 17.8123 |
| Crmp1         | NM_007765              | 2.59E-05 | 21.8561 | 8.97037 | 4.85144 | 17.3748 | 4.11893 | 17.3748 |
| Tspan15       | NM_197996              | 8.95E-06 | 28.5598 | 9.02092 | 4.91402 | 17.2307 | 4.10691 | 17.2307 |
| Cadm1         | NM_207675              | 5.92E-05 | 17.7498 | 9.00621 | 4.9009  | 17.2115 | 4.1053  | 17.2115 |
| Gbp9          | NM_172777              | 0.000871 | 8.92543 | 8.98347 | 4.8889  | 17.084  | 4.09457 | 17.084  |
| Csprs         | NM_033616              | 1.74E-05 | 24.1711 | 8.25286 | 4.18929 | 16.7208 | 4.06357 | 16.7208 |
| Prune2        | NM_181348              | 9.95E-06 | 27.8036 | 8.54078 | 4.55915 | 15.7976 | 3.98163 | 15.7976 |
| Samd12        | NM_177225              | 4.45E-05 | 19.0717 | 8.72975 | 4.77083 | 15.5508 | 3.95892 | 15.5508 |
| Xlr           | NM_011725              | 0.000522 | 10.1935 | 7.00046 | 3.04832 | 15.478  | 3.95215 | 15.478  |
| Slx1          | NM_029181              | 6.27E-05 | 17.4927 | 7.13373 | 3.20701 | 15.2076 | 3.92672 | 15.2076 |
| Rgs17         | NM_001161822           | 5.44E-05 | 18.128  | 8.27048 | 4.38765 | 14.7519 | 3.88283 | 14.7519 |
| Gcnt1         | NM_173442              | 0.000161 | 13.77   | 8.51572 | 4.63328 | 14.748  | 3.88244 | 14.748  |
| Plscr2        | NM_001195084           | 0.000103 | 15.4194 | 7.75378 | 3.88071 | 14.6524 | 3.87307 | 14.6524 |
| Itgb8         | NM_177290              | 5.31E-05 | 18.2408 | 8.20808 | 4.33858 | 14.6162 | 3.8695  | 14.6162 |
| Fam134b       | NM_001034851           | 1.46E-05 | 25.2417 | 9.24649 | 5.46098 | 13.7896 | 3.78551 | 13.7896 |
| Itga6         | NM_008397              | 2.45E-05 | 22.1714 | 8.27407 | 4.50118 | 13.6695 | 3.77289 | 13.6695 |
| Vmn2r50       | ENSMUST0000008629<br>8 | 4.67E-05 | 18.8423 | 8.48883 | 4.72481 | 13.5857 | 3.76402 | 13.5857 |
| 3830403N18Rik | NM_027510              | 0.000306 | 11.693  | 6.79949 | 3.03766 | 13.5651 | 3.76183 | 13.5651 |
| Rims2         | NM_053271              | 5.73E-06 | 31.941  | 8.22409 | 4.47648 | 13.4321 | 3.74761 | 13.4321 |
| Gm10058       | NM_001109969           | 0.000116 | 14.9692 | 7.31564 | 3.60406 | 13.1008 | 3.71158 | 13.1008 |
| Scrn1         | NM_027268              | 0.000174 | 13.5045 | 10.1916 | 6.48139 | 13.0882 | 3.71019 | 13.0882 |
| Mustn1        | NM_181390              | 0.001386 | 7.90419 | 10.8906 | 7.19837 | 12.9266 | 3.69227 | 12.9266 |

|               |              |          |         |         |         |         |         |         |
|---------------|--------------|----------|---------|---------|---------|---------|---------|---------|
| Pde3b         | NM_011055    | 2.12E-05 | 22.9942 | 9.13237 | 5.45117 | 12.8278 | 3.68121 | 12.8278 |
| Zfp772        | BC023179     | 1.59E-05 | 24.7151 | 8.36801 | 4.69233 | 12.7787 | 3.67567 | 12.7787 |
| Crabp2        | NM_007759    | 0.000299 | 11.7624 | 9.62704 | 5.95321 | 12.7624 | 3.67383 | 12.7624 |
| Tmem74        | NM_175502    | 9.71E-06 | 27.979  | 7.51722 | 3.86118 | 12.606  | 3.65603 | 12.606  |
| Epb4.114a     | NM_013512    | 1.48E-06 | 44.853  | 8.28537 | 4.632   | 12.5826 | 3.65336 | 12.5826 |
| Gm10058       | NM_001109969 | 8.92E-05 | 15.9995 | 7.6614  | 4.0104  | 12.562  | 3.651   | 12.562  |
| Gm10058       | NM_001109969 | 8.92E-05 | 15.9995 | 7.6614  | 4.0104  | 12.562  | 3.651   | 12.562  |
| Lama5         | NM_001081171 | 4.78E-07 | 59.4823 | 9.19832 | 5.58398 | 12.2469 | 3.61434 | 12.2469 |
| Gabrb3        | NM_008071    | 2.02E-05 | 23.2854 | 7.90799 | 4.2984  | 12.2066 | 3.60959 | 12.2066 |
| C130026I21Rik | NM_175219    | 3.93E-05 | 19.6803 | 7.93363 | 4.32669 | 12.1842 | 3.60694 | 12.1842 |
| 4930528F23Rik | NM_029197    | 0.002387 | 6.84257 | 6.39718 | 2.80106 | 12.0931 | 3.59611 | 12.0931 |
| Pax3          | NM_008781    | 8.24E-06 | 29.1586 | 8.60785 | 5.03846 | 11.8712 | 3.56939 | 11.8712 |
| Gm10058       | NM_001109969 | 8.50E-05 | 16.1982 | 7.59464 | 4.03725 | 11.7729 | 3.55739 | 11.7729 |
| Gm10058       | NM_001109969 | 8.50E-05 | 16.1982 | 7.59464 | 4.03725 | 11.7729 | 3.55739 | 11.7729 |
| Col18a1       | NM_009929    | 7.89E-07 | 52.4736 | 9.86335 | 6.30602 | 11.7723 | 3.55732 | 11.7723 |
| Osbpl3        | NM_027881    | 0.000179 | 13.4158 | 9.45104 | 5.91173 | 11.6263 | 3.53931 | 11.6263 |
| Adh7          | NM_009626    | 0.000641 | 9.66601 | 11.5288 | 8.00619 | 11.4921 | 3.52257 | 11.4921 |
| Aldh3a1       | NM_007436    | 0.001271 | 8.08537 | 12.0718 | 8.55346 | 11.4585 | 3.51835 | 11.4585 |
| Tinagl1       | NM_023476    | 9.61E-06 | 28.0492 | 9.76805 | 6.27067 | 11.2932 | 3.49738 | 11.2932 |
| Kcnn4         | NM_008433    | 2.52E-05 | 22.0237 | 8.87866 | 5.39019 | 11.2237 | 3.48847 | 11.2237 |
| Pde1b         | NM_008800    | 0.000344 | 11.3429 | 9.15644 | 5.67831 | 11.1435 | 3.47813 | 11.1435 |
| Cdh6          | NM_007666    | 0.000118 | 14.8972 | 7.9585  | 4.48323 | 11.1214 | 3.47527 | 11.1214 |
| Prune2        | NM_181348    | 3.42E-05 | 20.3862 | 8.44423 | 4.96968 | 11.1159 | 3.47456 | 11.1159 |
| Cdh26         | NM_198656    | 0.00067  | 9.5541  | 7.64636 | 4.17323 | 11.1049 | 3.47312 | 11.1049 |
| Gm10058       | NM_001109969 | 8.64E-05 | 16.1306 | 7.6025  | 4.138   | 11.0387 | 3.4645  | 11.0387 |
| Gm10058       | NM_001109969 | 8.64E-05 | 16.1306 | 7.6025  | 4.138   | 11.0387 | 3.4645  | 11.0387 |
| Gm10058       | NM_001109969 | 8.64E-05 | 16.1306 | 7.6025  | 4.138   | 11.0387 | 3.4645  | 11.0387 |
| Gm10058       | NM_001109969 | 8.64E-05 | 16.1306 | 7.6025  | 4.138   | 11.0387 | 3.4645  | 11.0387 |
| Gm10058       | NM_001109969 | 8.64E-05 | 16.1306 | 7.6025  | 4.138   | 11.0387 | 3.4645  | 11.0387 |
|               | ---          | 0.00257  | 6.70825 | 7.17055 | 3.70867 | 11.0187 | 3.46188 | 11.0187 |
| Igf2bp3       | NM_023670    | 2.58E-06 | 38.9942 | 7.94166 | 4.48535 | 10.9762 | 3.4563  | 10.9762 |

|                    |                        |                 |                |                |                |                |                |                |
|--------------------|------------------------|-----------------|----------------|----------------|----------------|----------------|----------------|----------------|
| 2310002L13Rik      | ENSMUST0000002539<br>0 | 6.86E-05        | 17.1019        | 7.00606        | 3.5627         | 10.8782        | 3.44336        | 10.8782        |
| Ralgps2            | NM_001159965           | 6.71E-07        | 54.6462        | 7.76347        | 4.3604         | 10.5785        | 3.40307        | 10.5785        |
| Ctsc               | NM_009982              | 0.002978        | 6.44768        | 9.34183        | 5.941          | 10.5622        | 3.40083        | 10.5622        |
| Pip5k1b            | NM_008846              | 4.51E-05        | 19.0066        | 7.52129        | 4.1604         | 10.2737        | 3.36089        | 10.2737        |
| 1700008I05Rik      | NM_027952              | 0.000352        | 11.2789        | 6.83255        | 3.47929        | 10.2195        | 3.35326        | 10.2195        |
|                    | ---                    | 0.001257        | 8.11046        | 7.0736         | 3.72387        | 10.1945        | 3.34972        | 10.1945        |
| Igf2bp1            | NM_009951              | 5.20E-05        | 18.3369        | 7.83081        | 4.51089        | 9.98609        | 3.31992        | 9.98609        |
| Mtap2              | NM_001039934           | 7.42E-06        | 29.9321        | 7.54563        | 4.27095        | 9.67779        | 3.27468        | 9.67779        |
| Cmb1               | NM_181588              | 4.27E-05        | 19.2768        | 7.36176        | 4.09317        | 9.63704        | 3.26859        | 9.63704        |
| 2810047C21Rik<br>1 | NR_015598              | 0.000203        | 12.9893        | 7.94242        | 4.67424        | 9.63435        | 3.26819        | 9.63435        |
|                    | ---                    | 0.002124        | 7.05922        | 6.20282        | 2.95435        | 9.5036         | 3.24847        | 9.5036         |
| Col8a1             | NM_007739              | 2.90E-06        | 37.8725        | 9.25361        | 6.00692        | 9.49188        | 3.24669        | 9.49188        |
| Snora2b            | NR_034052              | 0.00044         | 10.6511        | 7.88319        | 4.64326        | 9.44749        | 3.23993        | 9.44749        |
| Hpse               | NM_152803              | 8.38E-05        | 16.2558        | 9.32975        | 6.10022        | 9.37965        | 3.22953        | 9.37965        |
| AU021092           | NM_001033220           | 0.000113        | 15.083         | 7.41454        | 4.18775        | 9.36182        | 3.22679        | 9.36182        |
| Ces1g              | NM_021456              | 1.40E-07        | 80.898         | 7.54618        | 4.33586        | 9.25557        | 3.21032        | 9.25557        |
| Prrg4              | NM_178695              | 0.006732        | 5.1527         | 7.43166        | 4.22827        | 9.2112         | 3.20339        | 9.2112         |
| 1700049E17Rik1     | ENSMUST0000009598<br>5 | 0.000745        | 9.29513        | 6.90163        | 3.71056        | 9.13289        | 3.19107        | 9.13289        |
| 4930503E14Rik      | NM_029131              | 3.42E-05        | 20.3817        | 7.44721        | 4.27186        | 9.03393        | 3.17535        | 9.03393        |
| Bcar3              | NM_013867              | 7.71E-06        | 29.6472        | 8.31054        | 5.14405        | 8.9786         | 3.16649        | 8.9786         |
| Gm5169             | NM_001040669           | 0.000165        | 13.6876        | 6.93           | 3.76464        | 8.97153        | 3.16535        | 8.97153        |
| Arhgef33           | NM_001145452           | 0.000114        | 15.0485        | 7.2644         | 4.1261         | 8.80484        | 3.1383         | 8.80484        |
| Csprs              | NM_033616              | 0.00012         | 14.8387        | 8.48902        | 5.36229        | 8.73451        | 3.12673        | 8.73451        |
| Cav2               | NM_016900              | 8.70E-06        | 28.7592        | 9.8073         | 6.684          | 8.71376        | 3.12329        | 8.71376        |
| <b>Pdgfb</b>       | <b>NM_011057</b>       | <b>0.000273</b> | <b>12.0379</b> | <b>8.47619</b> | <b>5.35867</b> | <b>8.67895</b> | <b>3.11752</b> | <b>8.67895</b> |
| Scx                | NM_198885              | 0.000104        | 15.3761        | 9.882          | 6.78575        | 8.5519         | 3.09625        | 8.5519         |
| Tll7               | NM_027594              | 1.67E-05        | 24.4276        | 8.2177         | 5.12457        | 8.53349        | 3.09314        | 8.53349        |
| Pcolce2            | NM_029620              | 0.000263        | 12.1507        | 8.21413        | 5.12286        | 8.52246        | 3.09127        | 8.52246        |
| Eps8l2             | NM_133191              | 4.61E-06        | 33.7248        | 8.83185        | 5.7467         | 8.48643        | 3.08516        | 8.48643        |
| Pla2g7             | NM_013737              | 0.000147        | 14.103         | 8.55077        | 5.48431        | 8.37717        | 3.06646        | 8.37717        |

|                |                        |          |         |         |         |         |         |         |
|----------------|------------------------|----------|---------|---------|---------|---------|---------|---------|
| Robo2          | NM_175549              | 0.000682 | 9.51063 | 8.47502 | 5.41927 | 8.3152  | 3.05575 | 8.3152  |
|                | ---                    | 3.11E-06 | 37.2258 | 9.79592 | 6.74405 | 8.29284 | 3.05187 | 8.29284 |
| Ppm1e          | NM_177167              | 8.59E-06 | 28.8487 | 7.92428 | 4.87456 | 8.2805  | 3.04972 | 8.2805  |
| Rundc3a        | NM_016759              | 0.000233 | 12.5335 | 9.1745  | 6.12805 | 8.26173 | 3.04644 | 8.26173 |
| Eya1           | NM_010164              | 0.000151 | 14.0032 | 7.22708 | 4.21701 | 8.05605 | 3.01007 | 8.05605 |
| Afap1l2        | NM_146102              | 0.000716 | 9.3924  | 9.35565 | 6.36283 | 7.96027 | 2.99282 | 7.96027 |
| Pla2g5         | NM_001122954           | 0.000312 | 11.6347 | 8.27086 | 5.28135 | 7.94205 | 2.98951 | 7.94205 |
| A630033H20Rik  | NM_175442              | 0.000146 | 14.1317 | 6.50303 | 3.51718 | 7.92187 | 2.98584 | 7.92187 |
| Gprc5a         | NM_181444              | 0.002021 | 7.1531  | 7.61784 | 4.64813 | 7.83376 | 2.96971 | 7.83376 |
| Slc22a23       | NM_001033167           | 0.000149 | 14.0524 | 8.11479 | 5.15942 | 7.75633 | 2.95537 | 7.75633 |
| Lef1           | NM_010703              | 0.000203 | 12.9877 | 8.56944 | 5.61479 | 7.75245 | 2.95465 | 7.75245 |
| Foxd1          | NM_008242              | 4.28E-07 | 61.1549 | 7.7945  | 4.84006 | 7.75128 | 2.95443 | 7.75128 |
| Murc           | NM_026509              | 2.08E-06 | 41.1552 | 7.89902 | 4.95638 | 7.68819 | 2.94264 | 7.68819 |
| 1700049E17Rik1 | ENSMUST0000010070<br>1 | 0.000825 | 9.05221 | 6.70439 | 3.76956 | 7.64668 | 2.93483 | 7.64668 |
| Lgr6           | NM_001033409           | 7.22E-05 | 16.8803 | 7.98365 | 5.04889 | 7.6463  | 2.93476 | 7.6463  |
| Arl4d          | NM_025404              | 0.000174 | 13.5089 | 8.80729 | 5.89451 | 7.53069 | 2.91278 | 7.53069 |
|                | ---                    | 0.003956 | 5.96949 | 6.58083 | 3.67398 | 7.4998  | 2.90685 | 7.4998  |
| Naip2          | NM_010872              | 0.000436 | 10.6777 | 7.60484 | 4.69851 | 7.49705 | 2.90632 | 7.49705 |
| Apol9b         | NM_173743              | 0.000308 | 11.6708 | 8.40558 | 5.51849 | 7.39774 | 2.88708 | 7.39774 |
| Gbp4           | NM_008620              | 2.80E-05 | 21.4339 | 7.99935 | 5.11368 | 7.39048 | 2.88567 | 7.39048 |
| Fgf5           | NM_010203              | 7.48E-05 | 16.7314 | 7.89545 | 5.03552 | 7.25983 | 2.85994 | 7.25983 |
| Atp6v0e2       | NM_133764              | 3.42E-05 | 20.386  | 9.29258 | 6.45175 | 7.1643  | 2.84083 | 7.1643  |
| Nuak2          | NM_001195025           | 3.19E-05 | 20.7418 | 8.16903 | 5.33029 | 7.15394 | 2.83874 | 7.15394 |
| Exoc6          | NM_175353              | 0.000128 | 14.6054 | 7.99515 | 5.16016 | 7.13537 | 2.83499 | 7.13537 |
| Il18rap        | NM_010553              | 0.000124 | 14.7156 | 7.90669 | 5.08094 | 7.08985 | 2.82575 | 7.08985 |
| Kcnk5          | NM_021542              | 0.000642 | 9.6623  | 7.41828 | 4.59859 | 7.0601  | 2.81969 | 7.0601  |
| Tlr6           | NM_011604              | 0.000181 | 13.3671 | 7.3363  | 4.52857 | 7.0018  | 2.80773 | 7.0018  |
| Gbp8           | NM_029509              | 0.000611 | 9.7853  | 6.90935 | 4.11941 | 6.91603 | 2.78995 | 6.91603 |
| Arhgef12       | NM_027144              | 0.000129 | 14.5816 | 7.02244 | 4.23265 | 6.91526 | 2.78978 | 6.91526 |
| Chd7           | NM_001081417           | 0.000468 | 10.4854 | 6.3898  | 3.60935 | 6.87067 | 2.78045 | 6.87067 |

|               |                   |          |         |         |         |         |         |         |
|---------------|-------------------|----------|---------|---------|---------|---------|---------|---------|
| Atp8a1        | NM_001038999      | 4.50E-05 | 19.0215 | 7.15747 | 4.3863  | 6.82659 | 2.77117 | 6.82659 |
| Sp140         | NM_001013817      | 0.000353 | 11.2683 | 7.62579 | 4.85913 | 6.80532 | 2.76666 | 6.80532 |
| 2810030E01Rik | NM_028317         | 0.000843 | 9.00252 | 7.50424 | 4.74403 | 6.77497 | 2.76022 | 6.77497 |
| Dusp18        | NM_173745         | 0.000291 | 11.842  | 8.79213 | 6.04088 | 6.733   | 2.75125 | 6.733   |
| Megf10        | NM_001001979      | 0.000167 | 13.6365 | 8.41095 | 5.66181 | 6.7232  | 2.74915 | 6.7232  |
| Ephb6         | NM_001146351      | 5.51E-05 | 18.0741 | 9.04277 | 6.29476 | 6.7179  | 2.74801 | 6.7179  |
| 4930503E14Rik | NM_029131         | 0.001843 | 7.33035 | 6.51227 | 3.76651 | 6.70743 | 2.74576 | 6.70743 |
| Spag1         | NM_012031         | 4.38E-05 | 19.148  | 7.2208  | 4.47578 | 6.704   | 2.74502 | 6.704   |
|               | ---               | 5.78E-05 | 17.8551 | 7.9998  | 5.26235 | 6.66888 | 2.73744 | 6.66888 |
| 4930420K17Rik | BC147127          | 0.001254 | 8.11502 | 8.05364 | 5.31889 | 6.65641 | 2.73474 | 6.65641 |
| Slc25a13      | NM_015829         | 5.05E-05 | 18.4727 | 8.73992 | 6.01715 | 6.60142 | 2.72278 | 6.60142 |
|               | ---               | 0.006426 | 5.22028 | 6.029   | 3.31024 | 6.5831  | 2.71877 | 6.5831  |
| Tdrkh         | NM_028307         | 0.001037 | 8.52941 | 7.23563 | 4.52313 | 6.55455 | 2.7125  | 6.55455 |
|               | ENSMUST0000009686 |          |         |         |         |         |         |         |
| A530040E14Rik | 2                 | 0.004962 | 5.60948 | 6.89193 | 4.19188 | 6.49826 | 2.70005 | 6.49826 |
|               | ENSMUST0000009686 |          |         |         |         |         |         |         |
| A530040E14Rik | 2                 | 0.004962 | 5.60948 | 6.89193 | 4.19188 | 6.49826 | 2.70005 | 6.49826 |
|               | ---               | 0.0045   | 5.76235 | 7.28849 | 4.60234 | 6.43594 | 2.68615 | 6.43594 |
| Prss23        | NM_029614         | 4.65E-05 | 18.8692 | 9.44353 | 6.76432 | 6.40506 | 2.67921 | 6.40506 |
| Nlrp4f        | NM_175290         | 0.001482 | 7.76568 | 5.7842  | 3.10783 | 6.39245 | 2.67637 | 6.39245 |
| Pkp2          | NM_026163         | 0.000795 | 9.14073 | 7.53543 | 4.86623 | 6.36075 | 2.6692  | 6.36075 |
| Ttil7         | NM_027594         | 3.26E-05 | 20.6347 | 8.62601 | 5.96229 | 6.33663 | 2.66372 | 6.33663 |
| Tcfap2a       | NM_011547         | 0.000363 | 11.1875 | 7.00842 | 4.34535 | 6.33383 | 2.66308 | 6.33383 |
| Slc16a13      | NM_172371         | 5.83E-06 | 31.803  | 9.16736 | 6.51138 | 6.30277 | 2.65599 | 6.30277 |
| Abcb1b        | NM_011075         | 0.002497 | 6.76075 | 8.70878 | 6.05608 | 6.28844 | 2.6527  | 6.28844 |
| Plekha1       | NM_133942         | 7.68E-06 | 29.6782 | 10.6351 | 7.98282 | 6.28653 | 2.65226 | 6.28653 |
| Avpi1         | NM_027106         | 2.17E-05 | 22.8529 | 8.73532 | 6.08521 | 6.27714 | 2.65011 | 6.27714 |
|               | ENSMUST0000009686 |          |         |         |         |         |         |         |
| A530040E14Rik | 2                 | 0.004835 | 5.64962 | 6.92853 | 4.28352 | 6.25501 | 2.64501 | 6.25501 |
|               | ENSMUST0000009686 |          |         |         |         |         |         |         |
| A530040E14Rik | 2                 | 0.004835 | 5.64962 | 6.92853 | 4.28352 | 6.25501 | 2.64501 | 6.25501 |
| Rragb         | NM_001004154      | 0.001231 | 8.15507 | 7.20288 | 4.57657 | 6.17447 | 2.62631 | 6.17447 |
| Gpc1          | NM_016696         | 0.001192 | 8.22354 | 10.068  | 7.44414 | 6.16402 | 2.62387 | 6.16402 |

|               |              |          |         |         |         |         |         |         |
|---------------|--------------|----------|---------|---------|---------|---------|---------|---------|
| Dlx1          | NM_010053    | 0.000914 | 8.81353 | 7.95339 | 5.33908 | 6.12328 | 2.61431 | 6.12328 |
| Fads3         | NM_021890    | 0.000536 | 10.1236 | 10.352  | 7.74333 | 6.09932 | 2.60865 | 6.09932 |
| Vtcn1         | NM_178594    | 4.44E-06 | 34.0472 | 7.4993  | 4.91132 | 6.01255 | 2.58798 | 6.01255 |
| Crip2         | NM_024223    | 0.001913 | 7.25806 | 10.2258 | 7.6379  | 6.01204 | 2.58785 | 6.01204 |
| Fam105a       | BC052328     | 1.93E-06 | 41.9502 | 6.97742 | 4.39625 | 5.98426 | 2.58117 | 5.98426 |
| Mapk12        | NM_013871    | 8.57E-05 | 16.1633 | 8.81897 | 6.24171 | 5.96806 | 2.57726 | 5.96806 |
| Chd7          | NM_001081417 | 7.96E-05 | 16.4665 | 6.10792 | 3.53147 | 5.96474 | 2.57646 | 5.96474 |
| Jup           | NM_010593    | 0.000555 | 10.0329 | 9.56413 | 6.99687 | 5.92684 | 2.56726 | 5.92684 |
| Ccnd1         | NM_007631    | 0.003135 | 6.35877 | 10.4658 | 7.90302 | 5.90847 | 2.56278 | 5.90847 |
| Napsa         | NM_008437    | 0.000326 | 11.5022 | 7.16104 | 4.60267 | 5.89041 | 2.55837 | 5.89041 |
| Als2cl        | NM_001146059 | 0.00019  | 13.2095 | 7.32742 | 4.77575 | 5.86312 | 2.55167 | 5.86312 |
| Insig1        | NM_153526    | 0.00033  | 11.4636 | 11.1073 | 8.57115 | 5.80032 | 2.53613 | 5.80032 |
| G930009F23Rik | AK145170     | 2.75E-05 | 21.5323 | 7.01399 | 4.47929 | 5.79458 | 2.5347  | 5.79458 |
| Trp53i11      | NM_001025246 | 0.000202 | 13.0035 | 8.43368 | 5.90092 | 5.78678 | 2.53276 | 5.78678 |
| Gm904         | BC147620     | 6.80E-05 | 17.1362 | 6.32437 | 3.80973 | 5.71456 | 2.51464 | 5.71456 |
| Lyz2          | NM_017372    | 0.000608 | 9.8002  | 6.41893 | 3.91663 | 5.66588 | 2.5023  | 5.66588 |
| Ctnna2        | NM_001109764 | 8.98E-05 | 15.9715 | 7.14928 | 4.66306 | 5.60309 | 2.48622 | 5.60309 |
| Nefm          | NM_008691    | 0.001203 | 8.20386 | 6.87172 | 4.39788 | 5.55521 | 2.47384 | 5.55521 |
| Pde2a         | NM_001143848 | 8.25E-06 | 29.1487 | 7.86091 | 5.38874 | 5.54879 | 2.47217 | 5.54879 |
| Chd7          | NM_001081417 | 2.86E-05 | 21.3235 | 6.71919 | 4.2477  | 5.54615 | 2.47149 | 5.54615 |
|               | ---          | 0.003275 | 6.28393 | 5.95576 | 3.48443 | 5.54555 | 2.47133 | 5.54555 |
| A530032D15Rik | NM_213615    | 1.70E-05 | 24.2939 | 9.08945 | 6.62191 | 5.53098 | 2.46754 | 5.53098 |
| Hspa4l        | NM_011020    | 0.000306 | 11.6912 | 9.55142 | 7.08397 | 5.53067 | 2.46745 | 5.53067 |
|               | ---          | 0.005741 | 5.3871  | 6.72613 | 4.25907 | 5.52919 | 2.46707 | 5.52919 |
|               | ---          | 0.002714 | 6.61079 | 6.14353 | 3.68561 | 5.49422 | 2.45791 | 5.49422 |
| Slc24a3       | NM_053195    | 0.002007 | 7.16614 | 8.01753 | 5.56125 | 5.488   | 2.45628 | 5.488   |
|               | ---          | 0.000678 | 9.52552 | 8.69771 | 6.24453 | 5.47623 | 2.45318 | 5.47623 |
| C630004H02Rik | BC024617     | 0.000178 | 13.4188 | 7.99469 | 5.5471  | 5.45507 | 2.4476  | 5.45507 |
| Bpgm          | NM_007563    | 0.000201 | 13.0242 | 9.15729 | 6.71448 | 5.43699 | 2.44281 | 5.43699 |
| Gm5168        | NM_001025607 | 6.15E-05 | 17.5809 | 6.15365 | 3.72571 | 5.38123 | 2.42794 | 5.38123 |
|               | ---          | 0.001773 | 7.40641 | 8.18135 | 5.76151 | 5.35113 | 2.41984 | 5.35113 |

|          |                   |          |         |         |         |         |         |         |
|----------|-------------------|----------|---------|---------|---------|---------|---------|---------|
| Gpr30    | NM_029771         | 0.001831 | 7.34336 | 6.95409 | 4.53643 | 5.34301 | 2.41765 | 5.34301 |
| Klhdc8a  | NM_144810         | 0.001548 | 7.67734 | 6.86279 | 4.45609 | 5.3026  | 2.4067  | 5.3026  |
| Epha2    | NM_010139         | 0.003414 | 6.21372 | 8.79294 | 6.41373 | 5.20251 | 2.37921 | 5.20251 |
| Spata13  | NM_001033272      | 1.64E-05 | 24.5236 | 6.5225  | 4.14744 | 5.18756 | 2.37506 | 5.18756 |
|          | ---               | 0.006712 | 5.15689 | 8.42929 | 6.05776 | 5.17488 | 2.37153 | 5.17488 |
| Lfng     | NM_008494         | 0.000432 | 10.703  | 7.33856 | 4.96843 | 5.16989 | 2.37013 | 5.16989 |
| Sema3b   | NM_001042779      | 0.000216 | 12.7809 | 8.03634 | 5.67324 | 5.14473 | 2.3631  | 5.14473 |
| Nr3c2    | NM_001083906      | 0.001284 | 8.06517 | 6.20495 | 3.84984 | 5.11632 | 2.35511 | 5.11632 |
| Milt3    | NM_027326         | 0.000174 | 13.5098 | 8.21251 | 5.86396 | 5.0931  | 2.34854 | 5.0931  |
| Scube3   | NM_001004366      | 0.000205 | 12.9584 | 7.36571 | 5.01941 | 5.08518 | 2.3463  | 5.08518 |
|          | ENSMUST0000010573 |          |         |         |         |         |         |         |
| Gm13235  | 6                 | 0.001138 | 8.3248  | 6.60463 | 4.26253 | 5.07041 | 2.3421  | 5.07041 |
|          | ENSMUST0000010573 |          |         |         |         |         |         |         |
| Gm13235  | 6                 | 0.001138 | 8.3248  | 6.60463 | 4.26253 | 5.07041 | 2.3421  | 5.07041 |
| Epb4.115 | NM_145506         | 0.000409 | 10.8538 | 7.7065  | 5.37445 | 5.0352  | 2.33205 | 5.0352  |
| Nhedc1   | NM_028946         | 0.00029  | 11.853  | 5.7887  | 3.47035 | 4.98762 | 2.31835 | 4.98762 |
| Mmp28    | NM_080453         | 0.000128 | 14.6011 | 8.38212 | 6.06529 | 4.98236 | 2.31683 | 4.98236 |
|          | ---               | 0.004623 | 5.7199  | 6.77179 | 4.45497 | 4.98232 | 2.31682 | 4.98232 |
| Swap70   | NM_009302         | 0.000304 | 11.7114 | 9.11374 | 6.79702 | 4.98197 | 2.31672 | 4.98197 |
| Vdr      | NM_009504         | 0.003733 | 6.06463 | 8.56914 | 6.25698 | 4.96625 | 2.31216 | 4.96625 |
| ApoI9a   | NM_173786         | 0.00067  | 9.55677 | 7.65576 | 5.34615 | 4.9575  | 2.30961 | 4.9575  |
| Chd7     | NM_001081417      | 0.000145 | 14.1431 | 6.40574 | 4.10099 | 4.94079 | 2.30474 | 4.94079 |
| Naip5    | NM_010870         | 0.002345 | 6.87484 | 5.75136 | 3.44666 | 4.94065 | 2.3047  | 4.94065 |
| Cp       | NM_001042611      | 0.001951 | 7.22078 | 11.9197 | 9.62505 | 4.90644 | 2.29468 | 4.90644 |
| Kif21a   | NM_001109040      | 1.66E-05 | 24.4369 | 8.95372 | 6.665   | 4.88622 | 2.28872 | 4.88622 |
|          | ---               | 0.00013  | 14.5408 | 8.4954  | 6.20676 | 4.88595 | 2.28864 | 4.88595 |
| Anxa3    | NM_013470         | 0.00264  | 6.66007 | 9.9935  | 7.7051  | 4.88515 | 2.2884  | 4.88515 |
| Sp140    | NM_001013817      | 0.0011   | 8.39867 | 6.73423 | 4.44598 | 4.88462 | 2.28825 | 4.88462 |
|          | ---               | 0.00101  | 8.58848 | 5.65484 | 3.36801 | 4.87983 | 2.28683 | 4.87983 |
| Aif1l    | NM_145144         | 6.60E-05 | 17.2679 | 8.10346 | 5.84128 | 4.79715 | 2.26218 | 4.79715 |
| Zdhhc2   | NM_178395         | 0.002608 | 6.68195 | 7.87651 | 5.61761 | 4.78629 | 2.25891 | 4.78629 |
| Cdc42ep1 | NM_027219         | 0.000346 | 11.3318 | 8.19183 | 5.93666 | 4.77389 | 2.25517 | 4.77389 |



|            |                        |          |         |         |         |         |         |         |
|------------|------------------------|----------|---------|---------|---------|---------|---------|---------|
| Slc22a4    | NM_019687              | 0.003537 | 6.15406 | 8.1964  | 5.94188 | 4.77178 | 2.25453 | 4.77178 |
| Pthlh      | NM_008970              | 0.00106  | 8.48105 | 7.87683 | 5.63125 | 4.74229 | 2.24558 | 4.74229 |
| Cdkn2b     | NM_007670              | 0.001711 | 7.47691 | 9.03278 | 6.79222 | 4.72583 | 2.24057 | 4.72583 |
| Chd7       | NM_001081417           | 4.55E-05 | 18.9687 | 5.71658 | 3.47897 | 4.71617 | 2.23761 | 4.71617 |
| Pdlim1     | NM_016861              | 0.001514 | 7.72191 | 9.85221 | 7.61609 | 4.71127 | 2.23612 | 4.71127 |
| Tiparp     | NM_178892              | 0.000353 | 11.2682 | 10.229  | 7.99501 | 4.70444 | 2.23402 | 4.70444 |
| Mobk12b    | ENSMUST0000010297<br>5 | 0.000126 | 14.6627 | 6.24534 | 4.01989 | 4.67659 | 2.22546 | 4.67659 |
| Ptprf      | NM_011213              | 0.000383 | 11.0381 | 8.53166 | 6.32116 | 4.62838 | 2.21051 | 4.62838 |
|            | ---                    | 0.002224 | 6.97314 | 6.88263 | 4.67317 | 4.62502 | 2.20946 | 4.62502 |
| Naip6      | NM_010871              | 0.002761 | 6.5805  | 5.25086 | 3.04296 | 4.62002 | 2.2079  | 4.62002 |
| Cdca7l     | NM_146040              | 0.000109 | 15.21   | 8.32848 | 6.12403 | 4.60899 | 2.20445 | 4.60899 |
| H2-gs10    | NM_001143689           | 0.000337 | 11.4066 | 7.33461 | 5.15119 | 4.54231 | 2.18343 | 4.54231 |
| Fbxo36     | NM_025386              | 6.84E-05 | 17.114  | 9.41133 | 7.23143 | 4.53122 | 2.1799  | 4.53122 |
| Gjb4       | NM_008127              | 2.37E-05 | 22.3597 | 6.94069 | 4.76524 | 4.51724 | 2.17544 | 4.51724 |
| Hap1       | NM_010404              | 0.001995 | 7.17842 | 7.04902 | 4.88285 | 4.4883  | 2.16617 | 4.4883  |
| Ptpn22     | NM_008979              | 0.00069  | 9.4828  | 5.8997  | 3.74009 | 4.46793 | 2.15961 | 4.46793 |
| Rab3ip     | NM_001003950           | 3.15E-06 | 37.0977 | 8.77532 | 6.61808 | 4.4606  | 2.15724 | 4.4606  |
| Efna1      | NM_010107              | 0.001682 | 7.51022 | 8.07286 | 5.91743 | 4.45503 | 2.15544 | 4.45503 |
| Arhgap18   | NM_176837              | 0.000801 | 9.12313 | 8.67731 | 6.5238  | 4.44907 | 2.1535  | 4.44907 |
| Cd59a      | NM_001111060           | 0.000163 | 13.7219 | 7.59109 | 5.44619 | 4.42263 | 2.1449  | 4.42263 |
| Ncf4       | NM_008677              | 0.000408 | 10.8606 | 6.73002 | 4.58548 | 4.42149 | 2.14453 | 4.42149 |
| Syt7       | NM_173068              | 0.000262 | 12.1657 | 7.78725 | 5.64509 | 4.41423 | 2.14216 | 4.41423 |
| Rap1gap2   | NM_001015046           | 0.000885 | 8.89028 | 7.7131  | 5.57172 | 4.41182 | 2.14137 | 4.41182 |
| Mageb1     | NM_010759              | 0.000371 | 11.1264 | 5.89381 | 3.75806 | 4.39465 | 2.13575 | 4.39465 |
| Mageb1     | NM_010759              | 0.000371 | 11.1264 | 5.89381 | 3.75806 | 4.39465 | 2.13575 | 4.39465 |
| Slc25a23   | NM_025877              | 1.84E-06 | 42.4276 | 7.26616 | 5.13067 | 4.39386 | 2.13549 | 4.39386 |
| Cdkn2aipnl | NM_029976              | 0.000443 | 10.6326 | 9.43276 | 7.30229 | 4.37861 | 2.13047 | 4.37861 |
| Metrn      | NM_133719              | 0.000174 | 13.5038 | 8.35931 | 6.23109 | 4.37178 | 2.12822 | 4.37178 |
| Zfp600     | NM_001177546           | 0.001929 | 7.24274 | 4.68201 | 2.5539  | 4.37144 | 2.12811 | 4.37144 |
| Sp110      | NM_175397              | 0.000361 | 11.2076 | 7.5949  | 5.46724 | 4.37009 | 2.12766 | 4.37009 |

|          |              |          |         |         |         |         |         |         |
|----------|--------------|----------|---------|---------|---------|---------|---------|---------|
| B3gnt2   | NM_016888    | 0.000848 | 8.98863 | 8.43974 | 6.32145 | 4.34177 | 2.11828 | 4.34177 |
| Gm10058  | NM_001109969 | 0.000281 | 11.9482 | 5.42016 | 3.31923 | 4.28989 | 2.10094 | 4.28989 |
| Gm13242  | NM_001103158 | 0.001465 | 7.79013 | 5.32954 | 3.22881 | 4.28927 | 2.10073 | 4.28927 |
| Pcdh17   | NM_001013753 | 0.001925 | 7.24633 | 7.43555 | 5.33873 | 4.27767 | 2.09682 | 4.27767 |
| Plin4    | NM_020568    | 0.000493 | 10.3443 | 7.33268 | 5.24151 | 4.26096 | 2.09118 | 4.26096 |
| Zdhhc16  | NM_023740    | 5.36E-06 | 32.4787 | 9.28105 | 7.19222 | 4.25402 | 2.08883 | 4.25402 |
| Rundc3b  | NM_198620    | 0.000758 | 9.2546  | 7.4236  | 5.33794 | 4.24468 | 2.08566 | 4.24468 |
| Lctl     | NM_145835    | 0.00067  | 9.55643 | 6.36948 | 4.29275 | 4.2185  | 2.07673 | 4.2185  |
| Acy3     | NM_027857    | 0.000246 | 12.3644 | 7.57536 | 5.49872 | 4.21822 | 2.07663 | 4.21822 |
| Plcd3    | NM_152813    | 0.000402 | 10.8983 | 8.09768 | 6.02894 | 4.19521 | 2.06874 | 4.19521 |
| Gm10058  | NM_001109969 | 0.002278 | 6.92837 | 5.94675 | 3.88241 | 4.18244 | 2.06434 | 4.18244 |
| Arhgap22 | NM_153800    | 0.000189 | 13.2287 | 7.78292 | 5.71949 | 4.1798  | 2.06343 | 4.1798  |
| Gstm7    | NM_026672    | 0.000483 | 10.3967 | 7.60177 | 5.54286 | 4.1667  | 2.05891 | 4.1667  |
| Rassf7   | NM_025886    | 0.005126 | 5.55926 | 7.29814 | 5.24171 | 4.15957 | 2.05644 | 4.15957 |
| Mmp9     | NM_013599    | 0.000879 | 8.90549 | 7.96967 | 5.91401 | 4.15733 | 2.05566 | 4.15733 |
| Glcci1   | NM_133236    | 0.000733 | 9.33544 | 8.41651 | 6.36175 | 4.15474 | 2.05476 | 4.15474 |
| Ahr      | NM_013464    | 0.006385 | 5.2298  | 8.98699 | 6.93707 | 4.14085 | 2.04993 | 4.14085 |
| Fnbp1l   | NM_001114665 | 0.000305 | 11.6971 | 9.51258 | 7.47719 | 4.09933 | 2.03539 | 4.09933 |
| P2ry14   | NM_133200    | 0.00369  | 6.08364 | 7.3866  | 5.35489 | 4.0889  | 2.03171 | 4.0889  |
| Rin1     | NM_145495    | 0.000549 | 10.0624 | 8.54671 | 6.52431 | 4.06257 | 2.02239 | 4.06257 |
| Klf5     | NM_009769    | 0.000416 | 10.8038 | 8.49884 | 6.47689 | 4.06133 | 2.02195 | 4.06133 |
| Chd7     | NM_001081417 | 6.63E-06 | 30.7922 | 5.47896 | 3.45843 | 4.05735 | 2.02054 | 4.05735 |
| Lphn3    | NM_198702    | 0.00088  | 8.90276 | 7.14228 | 5.12362 | 4.05206 | 2.01865 | 4.05206 |
| Cyp7a1   | NM_007824    | 0.001562 | 7.65857 | 5.44711 | 3.43601 | 4.03089 | 2.0111  | 4.03089 |
| Gm5665   | BC032201     | 0.000944 | 8.74027 | 5.38205 | 3.37228 | 4.02719 | 2.00977 | 4.02719 |
| Galnt10  | NM_134189    | 7.10E-06 | 30.2643 | 8.80966 | 6.80516 | 4.01248 | 2.00449 | 4.01248 |
|          | ---          | 0.004078 | 5.91994 | 9.2217  | 7.22791 | 3.98284 | 1.9938  | 3.98284 |
| Edil3    | NM_001037987 | 0.000798 | 9.13172 | 8.48844 | 6.49629 | 3.97829 | 1.99215 | 3.97829 |
| St3gal5  | NM_011375    | 2.10E-05 | 23.0583 | 10.5206 | 8.53062 | 3.97225 | 1.98996 | 3.97225 |
|          | ---          | 0.001826 | 7.3487  | 8.82841 | 6.84321 | 3.95918 | 1.9852  | 3.95918 |
| Met      | NM_008591    | 0.003377 | 6.23182 | 9.60659 | 7.62522 | 3.94868 | 1.98137 | 3.94868 |

|          |              |          |         |         |         |         |         |         |
|----------|--------------|----------|---------|---------|---------|---------|---------|---------|
| Lgals2   | NM_025622    | 0.000121 | 14.8234 | 6.14505 | 4.16448 | 3.94649 | 1.98057 | 3.94649 |
| Tjp1     | NM_009386    | 7.86E-05 | 16.5203 | 10.6055 | 8.62578 | 3.94406 | 1.97968 | 3.94406 |
| Gm14005  | NR_028590    | 0.000099 | 8.63277 | 7.22074 | 5.24314 | 3.93837 | 1.9776  | 3.93837 |
| Rrad     | NM_019662    | 0.002975 | 6.44947 | 8.44517 | 6.46771 | 3.93801 | 1.97747 | 3.93801 |
| Tmeff2   | NM_019790    | 0.000131 | 14.5277 | 7.6606  | 5.68386 | 3.93601 | 1.97673 | 3.93601 |
| Rasgef1a | NM_027526    | 5.04E-05 | 18.4885 | 6.82741 | 4.85171 | 3.93318 | 1.9757  | 3.93318 |
| MacroD2  | NM_001013802 | 2.07E-05 | 23.1296 | 7.38871 | 5.41512 | 3.92742 | 1.97358 | 3.92742 |
| Pdlim1   | NM_016861    | 0.001379 | 7.91514 | 9.68864 | 7.71508 | 3.92736 | 1.97356 | 3.92736 |
| Mfap3l   | NM_027756    | 0.000583 | 9.90392 | 7.85907 | 5.88627 | 3.92529 | 1.9728  | 3.92529 |
| Bhlhe41  | NM_024469    | 0.003605 | 6.12248 | 7.88281 | 5.91064 | 3.92356 | 1.97216 | 3.92356 |
|          | ---          | 0.000399 | 10.9258 | 5.09478 | 3.13353 | 3.89398 | 1.96124 | 3.89398 |
| Hagh     | NM_024284    | 9.18E-05 | 15.8844 | 10.2306 | 8.27288 | 3.88447 | 1.95772 | 3.88447 |
| Tnnt2    | NM_001130174 | 0.000177 | 13.4439 | 7.45335 | 5.49982 | 3.87322 | 1.95353 | 3.87322 |
| Mfsd6    | NM_133829    | 0.000119 | 14.8809 | 6.36177 | 4.41113 | 3.86546 | 1.95064 | 3.86546 |
| Chd7     | NM_001081417 | 0.002221 | 6.97535 | 6.39068 | 4.44205 | 3.86009 | 1.94863 | 3.86009 |
| Ogdhl    | NM_001081130 | 8.40E-05 | 16.2465 | 8.25315 | 6.30705 | 3.85331 | 1.9461  | 3.85331 |
| Itgb7    | NM_013566    | 0.000314 | 11.613  | 7.17353 | 5.23651 | 3.82914 | 1.93702 | 3.82914 |
| Dysf     | NM_021469    | 0.000598 | 9.83876 | 8.58829 | 6.65518 | 3.81878 | 1.93311 | 3.81878 |
|          | ---          | 0.004703 | 5.69299 | 7.47136 | 5.53848 | 3.81818 | 1.93288 | 3.81818 |
| Fmnl3    | NM_011711    | 3.77E-05 | 19.8953 | 9.43468 | 7.5027  | 3.81577 | 1.93197 | 3.81577 |
| Chd7     | NM_001081417 | 0.002717 | 6.60883 | 5.98691 | 4.05989 | 3.80268 | 1.92702 | 3.80268 |
|          | ---          | 0.000169 | 13.5995 | 8.71712 | 6.7909  | 3.80058 | 1.92622 | 3.80058 |
| Tuft1    | NM_011656    | 0.000666 | 9.56956 | 8.84488 | 6.92649 | 3.78    | 1.91839 | 3.78    |
| Gm14137  | NM_001039223 | 0.000299 | 11.7617 | 6.35147 | 4.4403  | 3.76117 | 1.91118 | 3.76117 |
| Tpd52    | NM_009412    | 0.001928 | 7.24352 | 7.76494 | 5.85712 | 3.7524  | 1.90782 | 3.7524  |
| Mobkl2b  | NM_178061    | 0.00019  | 13.2078 | 7.08303 | 5.17575 | 3.75102 | 1.90728 | 3.75102 |
|          | ---          | 0.00174  | 7.44316 | 9.43965 | 7.53739 | 3.73797 | 1.90226 | 3.73797 |
| Tmem38a  | NM_144534    | 7.48E-05 | 16.7273 | 7.13299 | 5.23309 | 3.73187 | 1.8999  | 3.73187 |
| Gimap9   | NM_174960    | 0.000474 | 10.4512 | 5.64865 | 3.74949 | 3.72997 | 1.89916 | 3.72997 |
| Ecsr     | NM_001033141 | 0.001438 | 7.82821 | 7.73126 | 5.84244 | 3.70333 | 1.88882 | 3.70333 |
| Il12rb1  | NM_008353    | 0.000608 | 9.79723 | 7.25787 | 5.37488 | 3.68839 | 1.88299 | 3.68839 |

|               |              |          |         |         |         |         |         |         |
|---------------|--------------|----------|---------|---------|---------|---------|---------|---------|
|               | ---          | 0.006392 | 5.2282  | 9.13369 | 7.25261 | 3.6835  | 1.88108 | 3.6835  |
| Jub           | NM_010590    | 0.000857 | 8.96307 | 8.41087 | 6.53033 | 3.68212 | 1.88054 | 3.68212 |
| Nupr1         | NM_019738    | 0.001107 | 8.38517 | 11.5231 | 9.6445  | 3.67705 | 1.87855 | 3.67705 |
| MacroD2       | NM_001013802 | 0.004159 | 5.88842 | 5.122   | 3.24764 | 3.6664  | 1.87436 | 3.6664  |
| Cadm4         | NM_153112    | 0.000153 | 13.9471 | 7.04721 | 5.17512 | 3.6606  | 1.87208 | 3.6606  |
| Pipox         | NM_008952    | 0.000768 | 9.22344 | 6.67129 | 4.79926 | 3.66048 | 1.87203 | 3.66048 |
| Fbxl2         | NM_178624    | 0.001761 | 7.4199  | 8.24153 | 6.37475 | 3.64717 | 1.86678 | 3.64717 |
| Bicd1         | NM_009753    | 6.54E-05 | 17.3053 | 6.51708 | 4.65375 | 3.63846 | 1.86333 | 3.63846 |
| Ivd           | NM_019826    | 7.11E-05 | 16.944  | 9.8438  | 7.98501 | 3.62703 | 1.85879 | 3.62703 |
| MacroD2       | NM_001013802 | 0.005859 | 5.35676 | 5.14675 | 3.29324 | 3.61379 | 1.85351 | 3.61379 |
| Scara5        | NM_028903    | 0.000103 | 15.4171 | 8.52678 | 6.67977 | 3.59753 | 1.84701 | 3.59753 |
| Nlk           | NM_008702    | 7.78E-05 | 16.5662 | 8.93106 | 7.08641 | 3.59167 | 1.84465 | 3.59167 |
| Llgl2         | NM_145438    | 2.01E-05 | 23.3152 | 6.7811  | 4.93663 | 3.59119 | 1.84446 | 3.59119 |
| Dmpk          | NM_032418    | 0.000409 | 10.8513 | 10.1272 | 8.2838  | 3.58857 | 1.84341 | 3.58857 |
| Sp110         | NM_175397    | 6.82E-05 | 17.1228 | 7.0597  | 5.21666 | 3.58767 | 1.84305 | 3.58767 |
| Slc24a6       | NM_133221    | 0.000586 | 9.8924  | 9.06568 | 7.223   | 3.58676 | 1.84268 | 3.58676 |
| Bid           | NM_007544    | 0.000495 | 10.334  | 8.74417 | 6.90202 | 3.58545 | 1.84215 | 3.58545 |
| Mcam          | NM_023061    | 0.001448 | 7.81304 | 8.28107 | 6.43996 | 3.58283 | 1.8411  | 3.58283 |
| Zfp239        | NM_001001792 | 0.001157 | 8.28837 | 7.61705 | 5.777   | 3.58022 | 1.84005 | 3.58022 |
| Mgat4a        | NM_173870    | 0.0003   | 11.7494 | 6.44263 | 4.6053  | 3.57349 | 1.83733 | 3.57349 |
| Nup210        | NM_018815    | 4.81E-06 | 33.3767 | 6.77024 | 4.93628 | 3.56514 | 1.83396 | 3.56514 |
| Car5b         | NM_181315    | 0.000954 | 8.71598 | 9.13806 | 7.30496 | 3.56304 | 1.83311 | 3.56304 |
| 1810011O10Rik | NM_026931    | 0.005464 | 5.46177 | 8.96631 | 7.1451  | 3.53377 | 1.82121 | 3.53377 |
| Mllt4         | NM_010806    | 5.04E-05 | 18.4849 | 9.05145 | 7.23498 | 3.52218 | 1.81647 | 3.52218 |
| Card6         | NM_001163138 | 0.000463 | 10.5141 | 6.06658 | 4.25713 | 3.50508 | 1.80945 | 3.50508 |
| Chd7          | NM_001081417 | 0.000328 | 11.4856 | 6.20028 | 4.39177 | 3.5028  | 1.80851 | 3.5028  |
| Chd7          | NM_001081417 | 0.000292 | 11.8297 | 6.27793 | 4.46985 | 3.50176 | 1.80808 | 3.50176 |
| Ppp1r14c      | NM_133485    | 0.000835 | 9.02478 | 7.33283 | 5.52496 | 3.50126 | 1.80787 | 3.50126 |
| Cspg4         | NM_139001    | 0.00029  | 11.8539 | 7.30496 | 5.50066 | 3.49259 | 1.8043  | 3.49259 |
|               | ---          | 0.00389  | 5.99669 | 4.94573 | 3.14344 | 3.48772 | 1.80229 | 3.48772 |
| BC049715      | NM_178776    | 0.00018  | 13.3832 | 6.31637 | 4.51805 | 3.47816 | 1.79832 | 3.47816 |

|               |              |          |         |         |         |         |         |         |
|---------------|--------------|----------|---------|---------|---------|---------|---------|---------|
| Zbp1          | NM_021394    | 0.002079 | 7.09926 | 7.36679 | 5.57017 | 3.47405 | 1.79662 | 3.47405 |
| Sema3f        | NM_011349    | 0.00011  | 15.1642 | 8.22221 | 6.42589 | 3.47332 | 1.79632 | 3.47332 |
| Eno3          | NM_007933    | 0.000394 | 10.9597 | 8.31429 | 6.52062 | 3.46696 | 1.79367 | 3.46696 |
| Bcl2          | NM_009741    | 0.000249 | 12.324  | 7.67549 | 5.88326 | 3.46349 | 1.79223 | 3.46349 |
| Dock8         | NM_028785    | 0.000177 | 13.4482 | 6.44817 | 4.65824 | 3.45798 | 1.78993 | 3.45798 |
| Sp110         | NM_175397    | 0.000161 | 13.7686 | 5.12057 | 3.33542 | 3.44653 | 1.78515 | 3.44653 |
| Sp110         | NM_175397    | 0.000161 | 13.7686 | 5.12057 | 3.33542 | 3.44653 | 1.78515 | 3.44653 |
| Trim30a       | NM_009099    | 0.000395 | 10.9524 | 8.7105  | 6.92648 | 3.44385 | 1.78402 | 3.44385 |
| Chd7          | NM_001081417 | 0.000169 | 13.5995 | 6.10721 | 4.32493 | 3.43969 | 1.78228 | 3.43969 |
| Magi3         | NM_133853    | 0.000322 | 11.5373 | 8.4958  | 6.71616 | 3.43339 | 1.77963 | 3.43339 |
| Gm5622        | NM_001013816 | 0.002877 | 6.50787 | 5.945   | 4.16573 | 3.43252 | 1.77927 | 3.43252 |
| Cbx5          | NM_007626    | 4.19E-05 | 19.3656 | 9.59016 | 7.81147 | 3.43114 | 1.77869 | 3.43114 |
| Cacnb3        | NM_007581    | 2.69E-05 | 21.6624 | 9.42961 | 7.65376 | 3.42438 | 1.77584 | 3.42438 |
| Slc6a6        | NM_009320    | 0.000141 | 14.2412 | 10.8272 | 9.05183 | 3.42329 | 1.77538 | 3.42329 |
| Cuedc1        | NM_198013    | 0.000188 | 13.2348 | 8.46533 | 6.69111 | 3.42054 | 1.77422 | 3.42054 |
|               | ---          | 0.00189  | 7.2817  | 8.04283 | 6.26977 | 3.41778 | 1.77306 | 3.41778 |
| Rabl2         | NM_026817    | 0.003254 | 6.29502 | 6.54562 | 4.77279 | 3.41723 | 1.77283 | 3.41723 |
| Fancl         | NM_025923    | 0.000176 | 13.4589 | 8.13482 | 6.3629  | 3.41508 | 1.77192 | 3.41508 |
| Myo10         | NM_019472    | 0.00098  | 8.65657 | 10.3025 | 8.53291 | 3.40947 | 1.76955 | 3.40947 |
| Acsbg1        | NM_053178    | 9.40E-05 | 15.7912 | 7.22736 | 5.45841 | 3.40806 | 1.76895 | 3.40806 |
| Baalc         | NM_080640    | 3.55E-05 | 20.1936 | 6.90909 | 5.1411  | 3.40579 | 1.76799 | 3.40579 |
|               | ---          | 0.000587 | 9.88816 | 8.84143 | 7.07568 | 3.40052 | 1.76576 | 3.40052 |
| Ankrd5        | NM_175667    | 0.000149 | 14.0371 | 5.7959  | 4.03411 | 3.3912  | 1.7618  | 3.3912  |
| Itga7         | NM_008398    | 0.000337 | 11.4064 | 7.40257 | 5.64296 | 3.38607 | 1.75961 | 3.38607 |
| Pcdh19        | NM_001105245 | 0.001399 | 7.88539 | 6.57426 | 4.81533 | 3.38446 | 1.75893 | 3.38446 |
| Ap3b2         | NM_021492    | 0.00063  | 9.71083 | 7.02543 | 5.26887 | 3.37893 | 1.75656 | 3.37893 |
| Elavl2        | NM_207685    | 4.35E-05 | 19.1901 | 6.28273 | 4.52762 | 3.37551 | 1.7551  | 3.37551 |
| Agrn          | NM_021604    | 5.13E-05 | 18.4045 | 8.10446 | 6.351   | 3.37166 | 1.75346 | 3.37166 |
| Nnt           | NR_003544    | 0.000191 | 13.1876 | 10.3949 | 8.64188 | 3.37065 | 1.75303 | 3.37065 |
| 4632427E13Rik | NR_015510    | 4.50E-05 | 19.0221 | 8.17273 | 6.42087 | 3.36791 | 1.75185 | 3.36791 |
| Rnls          | NM_001167818 | 0.000579 | 9.92171 | 7.66837 | 5.91685 | 3.36712 | 1.75152 | 3.36712 |

|                |              |          |         |         |         |         |         |         |
|----------------|--------------|----------|---------|---------|---------|---------|---------|---------|
| Clu            | NM_013492    | 0.000507 | 10.2681 | 7.50109 | 5.75059 | 3.36474 | 1.7505  | 3.36474 |
| Ablim1         | NM_178688    | 0.00057  | 9.96413 | 8.20345 | 6.4531  | 3.36439 | 1.75034 | 3.36439 |
| Epb4.1         | NM_183428    | 9.46E-06 | 28.1594 | 7.02028 | 5.27141 | 3.36094 | 1.74886 | 3.36094 |
| Nfkbie         | NM_008690    | 0.004296 | 5.83618 | 7.81748 | 6.07744 | 3.34042 | 1.74003 | 3.34042 |
| 9930111J21Rik2 | NM_173434    | 0.000519 | 10.2089 | 6.29298 | 4.5535  | 3.33914 | 1.73948 | 3.33914 |
| Rad18          | NM_001167730 | 0.003207 | 6.3196  | 8.13907 | 6.40141 | 3.33494 | 1.73766 | 3.33494 |
| Ly6c2          | NM_001099217 | 0.006854 | 5.12673 | 8.71924 | 6.98284 | 3.33204 | 1.7364  | 3.33204 |
| Rgnef          | NM_012026    | 0.000528 | 10.1609 | 7.70276 | 5.96756 | 3.32926 | 1.7352  | 3.32926 |
| Lrrk1          | NM_146191    | 0.000282 | 11.9379 | 8.55972 | 6.82524 | 3.3276  | 1.73448 | 3.3276  |
| Arhgdib        | NM_007486    | 0.000694 | 9.47049 | 7.92694 | 6.19283 | 3.32674 | 1.73411 | 3.32674 |
| Sync           | NM_023485    | 0.001336 | 7.98165 | 8.30275 | 6.56944 | 3.32491 | 1.73332 | 3.32491 |
| Mrps30         | NM_021556    | 1.33E-05 | 25.8296 | 8.06324 | 6.33048 | 3.32364 | 1.73276 | 3.32364 |
| Eml5           | NM_001081191 | 2.67E-05 | 21.6928 | 6.37561 | 4.64309 | 3.32308 | 1.73252 | 3.32308 |
| Fcgr4          | NM_144559    | 0.000866 | 8.93945 | 5.88182 | 4.1494  | 3.32284 | 1.73242 | 3.32284 |
| Tmem71         | NM_172514    | 7.77E-05 | 16.5709 | 5.89974 | 4.169   | 3.31899 | 1.73074 | 3.31899 |
| Pkp4           | NM_026361    | 0.000103 | 15.4249 | 8.56145 | 6.83093 | 3.31847 | 1.73052 | 3.31847 |
| Chek2          | NM_016681    | 0.002842 | 6.5293  | 7.17075 | 5.44482 | 3.30794 | 1.72593 | 3.30794 |
| Crim1          | NM_015800    | 0.001757 | 7.42436 | 9.94915 | 8.22393 | 3.30631 | 1.72522 | 3.30631 |
| Cdsn           | NM_001008424 | 0.003668 | 6.09375 | 7.88054 | 6.16071 | 3.29397 | 1.71983 | 3.29397 |
| Gsr            | NM_010344    | 4.63E-06 | 33.6972 | 8.9227  | 7.20366 | 3.29219 | 1.71905 | 3.29219 |
| Cdk6           | NM_009873    | 0.001789 | 7.38927 | 8.64593 | 6.92758 | 3.29058 | 1.71834 | 3.29058 |
|                | ---          | 0.001988 | 7.18505 | 10.9439 | 9.22606 | 3.28945 | 1.71785 | 3.28945 |
| Tcirg1         | NM_016921    | 0.000124 | 14.7337 | 9.96293 | 8.24668 | 3.2858  | 1.71624 | 3.2858  |
| Akr1c13        | NM_013778    | 0.000739 | 9.31492 | 5.60417 | 3.88809 | 3.28543 | 1.71608 | 3.28543 |
| Ash2l          | NM_011791    | 7.07E-06 | 30.2917 | 10.1317 | 8.41778 | 3.28055 | 1.71394 | 3.28055 |
| Ipo13          | NM_146152    | 7.78E-05 | 16.5635 | 8.88982 | 7.17972 | 3.27184 | 1.7101  | 3.27184 |
| Slc2a6         | NM_172659    | 0.000554 | 10.0391 | 7.75597 | 6.04587 | 3.27184 | 1.7101  | 3.27184 |
| Pdzd2          | NM_001081064 | 0.000603 | 9.82091 | 6.42246 | 4.71385 | 3.26845 | 1.70861 | 3.26845 |
| Hdac9          | NM_024124    | 0.000431 | 10.7106 | 6.76611 | 5.06131 | 3.25983 | 1.7048  | 3.25983 |
| Tnfrsf12a      | NM_013749    | 0.000543 | 10.0887 | 10.0596 | 8.35956 | 3.24913 | 1.70005 | 3.24913 |
| Spred2         | BC040462     | 0.00014  | 14.2645 | 9.05796 | 7.35801 | 3.24889 | 1.69995 | 3.24889 |

|                |                   |                |              |                |                |                |                |                |
|----------------|-------------------|----------------|--------------|----------------|----------------|----------------|----------------|----------------|
| Ptpre          | NM_011212         | 7.86E-05       | 16.5241      | 6.29663        | 4.59902        | 3.24362        | 1.69761        | 3.24362        |
|                | ---               | 5.03E-05       | 18.4901      | 10.2864        | 8.5904         | 3.23994        | 1.69597        | 3.23994        |
| Lmbr1l         | NM_029098         | 0.000445       | 10.6198      | 8.48088        | 6.78769        | 3.23372        | 1.6932         | 3.23372        |
| Tmie           | NM_146260         | 0.000572       | 9.95681      | 6.72742        | 5.037          | 3.2275         | 1.69042        | 3.2275         |
| Tec            | NM_001113460      | 0.003562       | 6.14258      | 8.44438        | 6.75994        | 3.21415        | 1.68444        | 3.21415        |
| LOC100038746   | ENSMUST0000008429 |                |              |                |                |                |                |                |
|                | 8                 | 7.57E-05       | 16.6782      | 8.32528        | 6.642          | 3.21157        | 1.68328        | 3.21157        |
| Slc1a4         | NM_018861         | 7.94E-05       | 16.477       | 10.1393        | 8.45736        | 3.2086         | 1.68195        | 3.2086         |
|                | ---               | 0.001473       | 7.77876      | 6.59048        | 4.90992        | 3.20552        | 1.68056        | 3.20552        |
| 4930572J05Rik  | NM_198607         | 8.43E-05       | 16.2332      | 7.4881         | 5.80821        | 3.20403        | 1.67989        | 3.20403        |
| Tmc6           | NM_145439         | 0.000233       | 12.5359      | 7.23469        | 5.55495        | 3.20369        | 1.67973        | 3.20369        |
| Ppm1l          | NM_178726         | 0.002024       | 7.1508       | 8.28389        | 6.60707        | 3.19723        | 1.67682        | 3.19723        |
| Stk17b         | NM_133810         | 0.000172       | 13.5472      | 10.8147        | 9.1447         | 3.18209        | 1.66997        | 3.18209        |
| Nrp2           | NM_001077403      | 0.003872       | 6.0046       | 9.05023        | 7.38072        | 3.18106        | 1.66951        | 3.18106        |
| Mtbp           | NM_134092         | 0.002863       | 6.51628      | 8.71594        | 7.04652        | 3.18085        | 1.66941        | 3.18085        |
| Nlgn1          | NM_138666         | 0.001203       | 8.20307      | 6.15252        | 4.4874         | 3.1714         | 1.66512        | 3.1714         |
| Abcb1a         | NM_011076         | 8.20E-05       | 16.3443      | 7.16939        | 5.50562        | 3.16843        | 1.66377        | 3.16843        |
|                | ---               | 6.73E-05       | 17.1838      | 8.99121        | 7.3318         | 3.15887        | 1.65941        | 3.15887        |
| Shc4           | NM_199022         | 8.64E-05       | 16.1326      | 6.74109        | 5.08302        | 3.15593        | 1.65807        | 3.15593        |
| Tarsl2         | NM_172310         | 0.001791       | 7.38619      | 6.93618        | 5.28153        | 3.14846        | 1.65465        | 3.14846        |
| Ngf            | NM_013609         | 0.000343       | 11.3548      | 7.3112         | 5.65803        | 3.14525        | 1.65317        | 3.14525        |
| Chd7           | NM_001081417      | 0.000747       | 9.28951      | 7.20766        | 5.55772        | 3.13821        | 1.64994        | 3.13821        |
| Sh3tc2         | NM_172628         | 0.000959       | 8.70481      | 6.53466        | 4.89045        | 3.12578        | 1.64422        | 3.12578        |
| Aqp5           | NM_009701         | 0.004151       | 5.89132      | 8.58286        | 6.93963        | 3.12364        | 1.64323        | 3.12364        |
| <b>Pdgfa</b>   | <b>NM_008808</b>  | <b>0.00014</b> | <b>14.26</b> | <b>8.78014</b> | <b>7.13949</b> | <b>3.11805</b> | <b>1.64064</b> | <b>3.11805</b> |
| 9930111J21Rik2 | NM_173434         | 0.000196       | 13.0933      | 6.16212        | 4.52192        | 3.1171         | 1.6402         | 3.1171         |
| Chd7           | NM_001081417      | 0.001057       | 8.48659      | 5.16462        | 3.53328        | 3.098          | 1.63134        | 3.098          |
| Slc30a4        | NM_011774         | 0.000154       | 13.9418      | 9.60296        | 7.97525        | 3.09021        | 1.6277         | 3.09021        |
| Coro2b         | NM_175484         | 0.000599       | 9.83452      | 6.45408        | 4.82871        | 3.08521        | 1.62537        | 3.08521        |
| Hist2h2be      | NM_178214         | 0.000879       | 8.90415      | 5.58497        | 3.96231        | 3.07943        | 1.62266        | 3.07943        |
| Herc6          | NM_025992         | 0.006101       | 5.29665      | 7.43708        | 5.81712        | 3.07366        | 1.61996        | 3.07366        |

|               |                        |          |         |         |         |         |         |         |
|---------------|------------------------|----------|---------|---------|---------|---------|---------|---------|
| Gm4340        | NM_001177535           | 0.000664 | 9.57603 | 5.26892 | 3.64949 | 3.07253 | 1.61943 | 3.07253 |
| Sc4mol        | NM_025436              | 0.001744 | 7.43916 | 10.6341 | 9.01745 | 3.0666  | 1.61664 | 3.0666  |
| A830019P07Rik | ENSMUST0000006908<br>4 | 0.001785 | 7.39279 | 5.93131 | 4.31621 | 3.06332 | 1.61509 | 3.06332 |
|               | ---                    | 0.000714 | 9.40032 | 8.87835 | 7.26423 | 3.06124 | 1.61411 | 3.06124 |
| 5730419I09Rik | NM_029081              | 0.000509 | 10.2611 | 8.72495 | 7.1184  | 3.04523 | 1.60655 | 3.04523 |
| Sh3bp2        | NM_001145859           | 0.000753 | 9.27077 | 7.57836 | 5.97311 | 3.04248 | 1.60525 | 3.04248 |
| Pitpm1        | NM_008851              | 0.00019  | 13.2088 | 8.31517 | 6.71049 | 3.04128 | 1.60468 | 3.04128 |
| Fam164c       | NM_172414              | 0.001097 | 8.40359 | 5.12887 | 3.52494 | 3.03969 | 1.60392 | 3.03969 |
|               | ---                    | 0.001604 | 7.60532 | 6.6178  | 5.01498 | 3.03736 | 1.60282 | 3.03736 |
|               | ---                    | 0.000735 | 9.32808 | 8.21415 | 6.61365 | 3.03248 | 1.6005  | 3.03248 |
| Carns1        | NM_134148              | 7.31E-05 | 16.8258 | 7.08067 | 5.48196 | 3.02872 | 1.59871 | 3.02872 |
| Itpr3         | NM_080553              | 4.25E-05 | 19.3013 | 8.84181 | 7.24671 | 3.02116 | 1.5951  | 3.02116 |
| Il34          | NM_029646              | 0.006375 | 5.23197 | 6.4066  | 4.8143  | 3.01529 | 1.5923  | 3.01529 |
| Cdkl5         | NM_001024624           | 7.31E-05 | 16.8279 | 5.5459  | 3.95607 | 3.01014 | 1.58983 | 3.01014 |
| 2310037I24Rik | BC083325               | 2.82E-05 | 21.4    | 10.7677 | 9.17843 | 3.00902 | 1.58929 | 3.00902 |
| Cdc14a        | NM_001080818           | 0.001143 | 8.31485 | 6.86286 | 5.27436 | 3.00737 | 1.5885  | 3.00737 |
| Rpap3         | NM_028003              | 5.24E-05 | 18.3076 | 8.58768 | 6.99957 | 3.00655 | 1.58811 | 3.00655 |
| Mrpl38        | NM_024177              | 6.36E-05 | 17.4294 | 9.81445 | 8.22699 | 3.00518 | 1.58745 | 3.00518 |
| Stk10         | NM_009288              | 4.33E-05 | 19.2094 | 7.74444 | 6.15982 | 2.99929 | 1.58462 | 2.99929 |
|               | ENSMUST0000009773      |          |         |         |         |         |         |         |
| Gm10561       | 6                      | 0.001527 | 7.70509 | 6.90311 | 5.3187  | 2.99885 | 1.58441 | 2.99885 |
| Ptpn6         | NM_013545              | 3.09E-05 | 20.9147 | 7.11393 | 5.52956 | 2.99876 | 1.58437 | 2.99876 |
| Gsto2         | NM_026619              | 0.001186 | 8.23486 | 7.87071 | 6.28704 | 2.99732 | 1.58367 | 2.99732 |
| Hspa8         | NM_031165              | 0.00024  | 12.4437 | 12.4385 | 10.8549 | 2.99723 | 1.58363 | 2.99723 |
| Des           | NM_010043              | 0.003528 | 6.15861 | 6.38248 | 4.80334 | 2.98792 | 1.57914 | 2.98792 |
| Sp100         | NM_013673              | 0.003225 | 6.31039 | 6.31224 | 4.7331  | 2.98792 | 1.57914 | 2.98792 |
| Ezr           | NM_009510              | 0.003649 | 6.10236 | 8.72486 | 7.14686 | 2.98556 | 1.578   | 2.98556 |
|               | ---                    | 0.001644 | 7.55632 | 9.44299 | 7.868   | 2.97933 | 1.57499 | 2.97933 |
| Sp110         | NM_175397              | 0.001741 | 7.44216 | 6.04114 | 4.46673 | 2.97814 | 1.57441 | 2.97814 |
| Lamb2         | NM_008483              | 5.87E-05 | 17.7844 | 10.8407 | 9.26745 | 2.97584 | 1.57329 | 2.97584 |
| Nipal3        | NM_028995              | 0.001304 | 8.03258 | 6.14278 | 4.57083 | 2.97306 | 1.57195 | 2.97306 |



|               |                        |          |         |         |         |         |         |         |
|---------------|------------------------|----------|---------|---------|---------|---------|---------|---------|
| 0610011F06Rik | NM_026686              | 0.000408 | 10.8605 | 8.84418 | 7.27281 | 2.97188 | 1.57137 | 2.97188 |
| Ptgsd         | NM_008963              | 0.001948 | 7.22377 | 7.18761 | 5.61646 | 2.97141 | 1.57115 | 2.97141 |
| Pick1         | NM_008837              | 0.000487 | 10.374  | 7.63811 | 6.07029 | 2.96455 | 1.56782 | 2.96455 |
| 2310037124Rik | BC003301               | 4.71E-05 | 18.8078 | 10.8091 | 9.24221 | 2.96271 | 1.56692 | 2.96271 |
| Hspb6         | NM_001012401           | 0.001011 | 8.58511 | 9.14342 | 7.57685 | 2.96199 | 1.56657 | 2.96199 |
| A630001G21Rik | NM_177055              | 0.001777 | 7.40218 | 6.27843 | 4.71273 | 2.96022 | 1.5657  | 2.96022 |
| 2200002D01Rik | NM_028179              | 7.97E-05 | 16.465  | 8.05802 | 6.4925  | 2.95985 | 1.56553 | 2.95985 |
| Gsto1         | NM_010362              | 5.80E-05 | 17.8397 | 10.2014 | 8.63696 | 2.95758 | 1.56442 | 2.95758 |
| Slc29a1       | NM_022880              | 0.000199 | 13.0426 | 9.60733 | 8.04342 | 2.95654 | 1.56391 | 2.95654 |
| Chst1         | NM_023850              | 0.000587 | 9.88801 | 7.63507 | 6.07133 | 2.95619 | 1.56374 | 2.95619 |
| Ifit2         | NM_008332              | 0.002227 | 6.97073 | 7.16104 | 5.5975  | 2.95579 | 1.56355 | 2.95579 |
| Cdkl2         | NM_016912              | 1.94E-05 | 23.5125 | 6.26418 | 4.70078 | 2.95548 | 1.56339 | 2.95548 |
| Ints4         | NM_027256              | 7.40E-05 | 16.7752 | 9.59677 | 8.03404 | 2.95411 | 1.56273 | 2.95411 |
| Vps13a        | NM_173028              | 0.002271 | 6.93431 | 7.82032 | 6.25925 | 2.95073 | 1.56107 | 2.95073 |
|               | ---                    | 0.00335  | 6.24571 | 6.63747 | 5.07646 | 2.95062 | 1.56102 | 2.95062 |
| Nlrp10        | NM_175532              | 0.004115 | 5.90536 | 5.73827 | 4.18052 | 2.94394 | 1.55775 | 2.94394 |
| Slc12a2       | NM_009194              | 0.002527 | 6.73851 | 9.61914 | 8.06186 | 2.943   | 1.55729 | 2.943   |
| Arhgap19      | NM_027667              | 0.001288 | 8.05865 | 5.96147 | 4.40614 | 2.93901 | 1.55533 | 2.93901 |
| Fgd3          | NM_015759              | 5.31E-05 | 18.2458 | 6.06336 | 4.50914 | 2.93676 | 1.55423 | 2.93676 |
| Gm9958        | ENSMUST0000006825<br>0 | 0.001526 | 7.70651 | 5.72914 | 4.17749 | 2.93152 | 1.55165 | 2.93152 |
| Etnk1         | NM_029250              | 0.000545 | 10.0788 | 9.68248 | 8.13183 | 2.92949 | 1.55065 | 2.92949 |
|               | ---                    | 0.000895 | 8.86371 | 10.436  | 8.88603 | 2.92816 | 1.54999 | 2.92816 |
| Agpat9        | NM_172715              | 0.000113 | 15.0687 | 7.50016 | 5.95112 | 2.92622 | 1.54904 | 2.92622 |
| Fam107b       | BC021353               | 4.67E-05 | 18.8393 | 6.58174 | 5.033   | 2.92562 | 1.54874 | 2.92562 |
| Taf2          | NM_001081288           | 0.002871 | 6.5118  | 9.87401 | 8.32544 | 2.92526 | 1.54857 | 2.92526 |
| Rhox2a        | NM_029203              | 0.003608 | 6.12093 | 6.148   | 4.60102 | 2.92205 | 1.54698 | 2.92205 |
| Pik3cb        | NM_029094              | 8.46E-05 | 16.2171 | 8.1153  | 6.56881 | 2.92105 | 1.54649 | 2.92105 |
| Fads1         | NM_146094              | 0.000458 | 10.5448 | 10.042  | 8.49706 | 2.91787 | 1.54492 | 2.91787 |
| Plcg2         | NM_172285              | 0.000363 | 11.1939 | 7.19954 | 5.65621 | 2.91466 | 1.54333 | 2.91466 |
| Slc23a2       | NM_018824              | 4.26E-05 | 19.2808 | 9.6001  | 8.05681 | 2.91459 | 1.54329 | 2.91459 |

|          |              |          |         |         |         |         |         |         |
|----------|--------------|----------|---------|---------|---------|---------|---------|---------|
| Epn3     | NM_027984    | 0.000404 | 10.885  | 7.15968 | 5.62052 | 2.90625 | 1.53916 | 2.90625 |
| Chd3     | NM_146019    | 5.32E-05 | 18.2326 | 9.73342 | 8.1951  | 2.90456 | 1.53832 | 2.90456 |
| Snta1    | NM_009228    | 0.001186 | 8.23482 | 7.88618 | 6.35065 | 2.89895 | 1.53553 | 2.89895 |
| Tns1     | NM_027884    | 0.001331 | 7.98847 | 10.0202 | 8.49135 | 2.88553 | 1.52884 | 2.88553 |
| Tfb1m    | NM_146074    | 0.007075 | 5.08125 | 7.33302 | 5.80466 | 2.88459 | 1.52837 | 2.88459 |
| Slc9a3r1 | NM_012030    | 0.000385 | 11.0218 | 8.61804 | 7.08992 | 2.88409 | 1.52812 | 2.88409 |
| Aftph    | NM_181411    | 5.06E-05 | 18.4677 | 9.51196 | 7.98573 | 2.88031 | 1.52622 | 2.88031 |
| Gchfr    | NM_177157    | 0.000889 | 8.87982 | 6.66588 | 5.13995 | 2.87972 | 1.52593 | 2.87972 |
| Net1     | NM_019671    | 0.004109 | 5.90787 | 7.92648 | 6.40136 | 2.87812 | 1.52513 | 2.87812 |
| Zfp664   | NM_001081750 | 0.000137 | 14.3614 | 9.48235 | 7.95814 | 2.87629 | 1.52421 | 2.87629 |
| Myof     | NM_001099634 | 0.000523 | 10.1877 | 10.5118 | 8.98843 | 2.87459 | 1.52336 | 2.87459 |
| P2rx1    | NM_008771    | 0.000118 | 14.8959 | 5.26771 | 3.7475  | 2.86832 | 1.52021 | 2.86832 |
|          | ---          | 0.000357 | 11.2408 | 7.71572 | 6.19562 | 2.86812 | 1.5201  | 2.86812 |
| Aplp2    | NM_001102455 | 9.14E-05 | 15.902  | 11.9179 | 10.3979 | 2.86799 | 1.52004 | 2.86799 |
| Sigirr   | NM_023059    | 0.000307 | 11.6847 | 6.81465 | 5.29524 | 2.86674 | 1.51941 | 2.86674 |
|          | ---          | 0.005834 | 5.36326 | 9.65931 | 8.13993 | 2.86669 | 1.51938 | 2.86669 |
| Camta1   | NM_001081557 | 0.00175  | 7.43259 | 5.11315 | 3.59452 | 2.86519 | 1.51863 | 2.86519 |
|          | ---          | 3.19E-05 | 20.7491 | 11.0064 | 9.4893  | 2.86221 | 1.51713 | 2.86221 |
| Specc1   | NM_001029936 | 0.000629 | 9.71499 | 7.61334 | 6.09667 | 2.8613  | 1.51667 | 2.8613  |
| Eral1    | NM_022313    | 0.000225 | 12.6423 | 8.17347 | 6.65937 | 2.85621 | 1.5141  | 2.85621 |
|          | ---          | 0.000208 | 12.8985 | 11.1762 | 9.66465 | 2.85124 | 1.51159 | 2.85124 |
| Slc35e4  | NM_153142    | 0.000385 | 11.0231 | 7.36315 | 5.85195 | 2.85046 | 1.5112  | 2.85046 |
| Gxylt2   | NM_198612    | 0.000431 | 10.7072 | 8.2722  | 6.7613  | 2.84989 | 1.5109  | 2.84989 |
| Tctn3    | NM_026260    | 0.002458 | 6.78913 | 7.77282 | 6.262   | 2.84972 | 1.51082 | 2.84972 |
| Gdpd5    | NM_201352    | 0.000444 | 10.627  | 7.27628 | 5.76596 | 2.84875 | 1.51033 | 2.84875 |
| Chd7     | NM_001081417 | 0.000428 | 10.7304 | 6.20962 | 4.70395 | 2.83957 | 1.50567 | 2.83957 |
| Cux1     | NM_009986    | 0.000721 | 9.37658 | 7.88676 | 6.38514 | 2.83161 | 1.50162 | 2.83161 |
| Plcl1    | NM_001114663 | 0.000296 | 11.7873 | 7.9745  | 6.47562 | 2.82623 | 1.49888 | 2.82623 |
|          | ---          | 0.000134 | 14.4227 | 9.61277 | 8.11415 | 2.82572 | 1.49862 | 2.82572 |
|          | ---          | 9.98E-05 | 15.5532 | 5.39408 | 3.89549 | 2.82566 | 1.49859 | 2.82566 |
| Strbp    | NM_009261    | 0.000292 | 11.8361 | 7.46304 | 5.96685 | 2.82096 | 1.49619 | 2.82096 |

|               |              |          |         |         |         |         |         |         |
|---------------|--------------|----------|---------|---------|---------|---------|---------|---------|
| Cacna1h       | NM_021415    | 0.00078  | 9.18719 | 6.38409 | 4.8882  | 2.82039 | 1.4959  | 2.82039 |
|               | ---          | 0.000241 | 12.4231 | 9.29797 | 7.80284 | 2.8189  | 1.49513 | 2.8189  |
| Pcdh1         | NM_029357    | 0.000178 | 13.4294 | 5.44766 | 3.9537  | 2.81661 | 1.49396 | 2.81661 |
| Sord          | NM_146126    | 0.006352 | 5.23726 | 10.6583 | 9.16453 | 2.81629 | 1.49379 | 2.81629 |
| Shisa4        | NM_175259    | 0.000713 | 9.40271 | 9.16471 | 7.67127 | 2.8156  | 1.49344 | 2.8156  |
| Acot7         | NM_133348    | 0.000698 | 9.45402 | 9.76622 | 8.2782  | 2.80505 | 1.48802 | 2.80505 |
| Abcb6         | NM_023732    | 0.000112 | 15.1153 | 8.35965 | 6.8735  | 2.80141 | 1.48615 | 2.80141 |
| Zfp422        | NM_026057    | 0.000204 | 12.9622 | 8.53312 | 7.04805 | 2.79931 | 1.48507 | 2.79931 |
| Usp53         | NM_133857    | 0.001128 | 8.34294 | 8.71739 | 7.23319 | 2.79763 | 1.48421 | 2.79763 |
|               | ---          | 0.000398 | 10.9314 | 10.3898 | 8.90613 | 2.79658 | 1.48366 | 2.79658 |
| Cd48          | NM_007649    | 0.003024 | 6.42077 | 5.08696 | 3.60378 | 2.79563 | 1.48318 | 2.79563 |
| Slc25a24      | NM_172685    | 7.28E-05 | 16.8464 | 9.81996 | 8.34075 | 2.78797 | 1.47922 | 2.78797 |
|               | ---          | 0.000134 | 14.419  | 10.1569 | 8.67893 | 2.78558 | 1.47798 | 2.78558 |
| Rad51c        | NM_053269    | 0.001455 | 7.80386 | 6.30861 | 4.83158 | 2.78375 | 1.47703 | 2.78375 |
| MacroD2       | NM_001013802 | 0.002454 | 6.79179 | 6.41612 | 4.94061 | 2.78082 | 1.47551 | 2.78082 |
| MacroD2       | NM_001013802 | 0.001389 | 7.89966 | 5.1162  | 3.6457  | 2.77119 | 1.47051 | 2.77119 |
| Ppip5k1       | NM_178795    | 1.44E-05 | 25.3393 | 7.40292 | 5.93441 | 2.76735 | 1.46851 | 2.76735 |
| Pcdh9         | NM_001081377 | 0.006619 | 5.17717 | 7.64325 | 6.17564 | 2.76564 | 1.46761 | 2.76564 |
|               | ---          | 0.000175 | 13.4822 | 10.8789 | 9.41138 | 2.76548 | 1.46753 | 2.76548 |
| Fam33a        | NM_025377    | 0.006578 | 5.1863  | 8.67618 | 7.20871 | 2.76536 | 1.46747 | 2.76536 |
| Adipor2       | NM_197985    | 0.002524 | 6.74079 | 8.94078 | 7.47554 | 2.76109 | 1.46524 | 2.76109 |
| Heatr2        | NM_001081265 | 1.18E-05 | 26.6363 | 7.48832 | 6.02309 | 2.76108 | 1.46523 | 2.76108 |
| Idh2          | NM_173011    | 0.000279 | 11.9769 | 10.0964 | 8.63303 | 2.75756 | 1.46339 | 2.75756 |
| Myo18a        | NM_011586    | 0.00017  | 13.5941 | 7.7893  | 6.32743 | 2.75466 | 1.46187 | 2.75466 |
| Synj2         | NM_011523    | 3.89E-05 | 19.7308 | 8.63337 | 7.17216 | 2.75339 | 1.46121 | 2.75339 |
| Map4k2        | NM_009006    | 0.000428 | 10.7278 | 7.55722 | 6.09886 | 2.74797 | 1.45837 | 2.74797 |
|               | ---          | 0.004771 | 5.67058 | 6.19466 | 4.7378  | 2.7451  | 1.45686 | 2.7451  |
| Pcgf5         | NM_029508    | 0.001943 | 7.22871 | 8.26675 | 6.81401 | 2.73728 | 1.45274 | 2.73728 |
| Prss46        | NM_183103    | 5.62E-05 | 17.9855 | 5.84643 | 4.39388 | 2.73691 | 1.45255 | 2.73691 |
| Rftn2         | NM_028713    | 3.58E-05 | 20.1471 | 7.99326 | 6.54371 | 2.73123 | 1.44955 | 2.73123 |
| 3110048L19Rik | NR_003549    | 0.003138 | 6.35693 | 7.91812 | 6.47144 | 2.7258  | 1.44668 | 2.7258  |

|               |              |          |         |         |         |         |         |         |
|---------------|--------------|----------|---------|---------|---------|---------|---------|---------|
| Edn1          | NM_010104    | 0.00103  | 8.54345 | 6.17595 | 4.73006 | 2.72431 | 1.44589 | 2.72431 |
| Dyrk3         | NM_145508    | 0.00376  | 6.05265 | 7.12663 | 5.6818  | 2.7223  | 1.44483 | 2.7223  |
| Sft2d2        | NM_145512    | 0.000174 | 13.4955 | 8.73964 | 7.29655 | 2.71902 | 1.44309 | 2.71902 |
| Sord          | NM_146126    | 0.005851 | 5.35872 | 10.4704 | 9.02744 | 2.71876 | 1.44295 | 2.71876 |
| Rcor2         | NM_054048    | 0.000867 | 8.93657 | 7.28012 | 5.83807 | 2.71707 | 1.44205 | 2.71707 |
| Vamp5         | NM_016872    | 3.32E-05 | 20.5372 | 7.63702 | 6.19546 | 2.71613 | 1.44155 | 2.71613 |
|               | ---          | 7.37E-05 | 16.7943 | 11.2083 | 9.76717 | 2.71539 | 1.44116 | 2.71539 |
| Nfs1          | NM_010911    | 0.000379 | 11.07   | 9.24685 | 7.80824 | 2.71059 | 1.43861 | 2.71059 |
| Reep6         | NM_139292    | 0.000691 | 9.47878 | 7.62346 | 6.18525 | 2.70983 | 1.4382  | 2.70983 |
| Mrpl19        | NM_026490    | 0.000233 | 12.5321 | 8.33239 | 6.89528 | 2.70777 | 1.43711 | 2.70777 |
| Odz3          | NM_011857    | 0.000263 | 12.1564 | 9.17189 | 7.73707 | 2.70347 | 1.43481 | 2.70347 |
| Zfp157        | NM_028130    | 0.004224 | 5.86318 | 8.02595 | 6.59137 | 2.70305 | 1.43459 | 2.70305 |
| 0610010O12Rik | BC028765     | 0.000502 | 10.2937 | 8.05893 | 6.62471 | 2.70237 | 1.43423 | 2.70237 |
| Rgs7          | NM_011880    | 0.00339  | 6.22534 | 4.61196 | 3.17811 | 2.70167 | 1.43385 | 2.70167 |
| Gpr123        | NM_177469    | 5.38E-05 | 18.1867 | 6.65523 | 5.22164 | 2.70117 | 1.43358 | 2.70117 |
| Lcor          | NM_172154    | 0.000201 | 13.009  | 8.58073 | 7.14741 | 2.70069 | 1.43333 | 2.70069 |
| Rpa1          | NM_001164223 | 0.001986 | 7.18698 | 8.62726 | 7.19744 | 2.69414 | 1.42983 | 2.69414 |
| Scn3a         | NM_018732    | 8.87E-05 | 16.0249 | 4.89202 | 3.46239 | 2.69377 | 1.42963 | 2.69377 |
| Tlcd1         | NM_026708    | 0.001083 | 8.43301 | 8.59501 | 7.16565 | 2.69327 | 1.42936 | 2.69327 |
| Tnfrsf9       | NM_011612    | 0.002934 | 6.47366 | 7.77629 | 6.34694 | 2.69325 | 1.42935 | 2.69325 |
| Otud7a        | NM_130880    | 0.000577 | 9.93382 | 5.92714 | 4.49941 | 2.69023 | 1.42773 | 2.69023 |
| 2310030G06Rik | BC027409     | 0.000759 | 9.25156 | 6.40078 | 4.97357 | 2.68926 | 1.42721 | 2.68926 |
|               | ---          | 0.00424  | 5.85709 | 10.6165 | 9.19265 | 2.68301 | 1.42385 | 2.68301 |
| Ehd4          | NM_133838    | 0.004748 | 5.67815 | 8.15421 | 6.73055 | 2.68265 | 1.42366 | 2.68265 |
| Hadh          | NM_008212    | 0.000319 | 11.5642 | 11.0209 | 9.59775 | 2.68178 | 1.42319 | 2.68178 |
| Hip1          | NM_146001    | 0.000634 | 9.69307 | 7.86477 | 6.44187 | 2.68125 | 1.4229  | 2.68125 |
| Nmt1          | NM_008707    | 2.22E-05 | 22.7394 | 10.4795 | 9.05744 | 2.67977 | 1.42211 | 2.67977 |
| Gdnf          | NM_010275    | 0.001941 | 7.23039 | 8.3514  | 6.92941 | 2.67954 | 1.42199 | 2.67954 |
| Glo1          | NM_025374    | 5.06E-05 | 18.4666 | 10.102  | 8.68009 | 2.67937 | 1.42189 | 2.67937 |
| Fahd1         | NM_023480    | 0.001819 | 7.35577 | 6.84934 | 5.42831 | 2.67777 | 1.42103 | 2.67777 |
| Ston2         | NM_175367    | 0.003488 | 6.17756 | 6.83891 | 5.41903 | 2.67564 | 1.41988 | 2.67564 |

|         |              |          |         |         |         |         |         |         |
|---------|--------------|----------|---------|---------|---------|---------|---------|---------|
| Cd300lb | NM_199221    | 0.001723 | 7.46325 | 6.66213 | 5.24391 | 2.67254 | 1.41821 | 2.67254 |
| Ddr1    | NM_007584    | 2.87E-05 | 21.3011 | 8.19401 | 6.77624 | 2.67173 | 1.41777 | 2.67173 |
| Rhpn2   | NM_027897    | 0.000691 | 9.47764 | 6.34121 | 4.92419 | 2.67034 | 1.41702 | 2.67034 |
| Axl     | NM_009465    | 2.36E-05 | 22.381  | 10.7282 | 9.31137 | 2.67006 | 1.41687 | 2.67006 |
| Parvb   | NM_133167    | 1.10E-05 | 27.0934 | 7.01545 | 5.59873 | 2.66978 | 1.41672 | 2.66978 |
| Adssl1  | NM_007421    | 0.004177 | 5.8814  | 7.84413 | 6.42874 | 2.66732 | 1.41539 | 2.66732 |
| Plekhg4 | NM_001081333 | 2.84E-05 | 21.3561 | 6.29555 | 4.8806  | 2.6665  | 1.41495 | 2.6665  |
| Lrp11   | NM_172784    | 0.000826 | 9.05118 | 8.50022 | 7.08875 | 2.66008 | 1.41147 | 2.66008 |
| C1qtnf1 | NM_019959    | 0.004062 | 5.9263  | 7.57183 | 6.16049 | 2.65985 | 1.41135 | 2.65985 |
| Trim16  | NM_053169    | 0.000674 | 9.53995 | 8.10094 | 6.69132 | 2.65667 | 1.40962 | 2.65667 |
|         | ---          | 0.00221  | 6.98478 | 5.48576 | 4.07974 | 2.65004 | 1.40602 | 2.65004 |
| Btbd9   | NM_027060    | 1.21E-05 | 26.4516 | 8.4448  | 7.03915 | 2.64937 | 1.40565 | 2.64937 |
|         | ---          | 0.000453 | 10.5717 | 10.9573 | 9.55178 | 2.64906 | 1.40548 | 2.64906 |
|         | ---          | 0.002716 | 6.60928 | 8.98497 | 7.5797  | 2.64866 | 1.40526 | 2.64866 |
|         | ---          | 8.38E-05 | 16.2543 | 11.3219 | 9.91706 | 2.64786 | 1.40483 | 2.64786 |
| Ccnt1   | NM_009833    | 0.000326 | 11.5003 | 9.26112 | 7.8573  | 2.64602 | 1.40382 | 2.64602 |
| Chd7    | NM_001081417 | 0.000409 | 10.8542 | 5.62206 | 4.21974 | 2.64326 | 1.40232 | 2.64326 |
| Wdyhv1  | NM_029734    | 0.000778 | 9.19361 | 8.95959 | 7.55769 | 2.6425  | 1.4019  | 2.6425  |
| Dyrk4   | NM_207210    | 0.002291 | 6.91833 | 5.76676 | 4.36566 | 2.64102 | 1.40109 | 2.64102 |
| Hexim2  | NM_027658    | 0.000545 | 10.0811 | 7.11466 | 5.71572 | 2.63708 | 1.39894 | 2.63708 |
| Tmem62  | NM_175285    | 0.001829 | 7.34574 | 7.41643 | 6.01893 | 2.63444 | 1.3975  | 2.63444 |
|         | ---          | 0.00302  | 6.42349 | 8.15739 | 6.76125 | 2.63196 | 1.39614 | 2.63196 |
| Cyfp2   | NM_133769    | 0.000841 | 9.00816 | 6.6299  | 5.23379 | 2.6319  | 1.3961  | 2.6319  |
| Bbs12   | NM_001008502 | 0.003846 | 6.01554 | 6.17124 | 4.77591 | 2.63048 | 1.39533 | 2.63048 |
| Plaur   | NM_011113    | 0.001704 | 7.48456 | 8.75644 | 7.36147 | 2.62982 | 1.39496 | 2.62982 |
| Stard13 | NM_001163493 | 0.003453 | 6.1946  | 8.31442 | 6.91953 | 2.62968 | 1.39489 | 2.62968 |
| Morc2a  | NM_001159288 | 0.001076 | 8.44771 | 10.1125 | 8.71789 | 2.62914 | 1.39459 | 2.62914 |
| Fam164a | NM_173181    | 0.001283 | 8.06563 | 9.39364 | 7.99975 | 2.62786 | 1.39389 | 2.62786 |
| Glo1    | NM_025374    | 5.04E-05 | 18.4813 | 10.1334 | 8.74217 | 2.62301 | 1.39122 | 2.62301 |
| Ctsw    | NM_009985    | 0.001256 | 8.11122 | 6.24522 | 4.85811 | 2.61555 | 1.38711 | 2.61555 |
|         | ---          | 0.00596  | 5.33131 | 8.63363 | 7.24714 | 2.61443 | 1.38649 | 2.61443 |

|            |              |          |         |         |         |         |         |         |
|------------|--------------|----------|---------|---------|---------|---------|---------|---------|
| Dagla      | NM_198114    | 5.31E-06 | 32.5568 | 7.6151  | 6.2287  | 2.61427 | 1.38641 | 2.61427 |
| Chd7       | NM_001081417 | 0.000509 | 10.2584 | 5.0961  | 3.70977 | 2.61413 | 1.38633 | 2.61413 |
| Msto1      | NM_144898    | 0.000143 | 14.1887 | 8.24496 | 6.8605  | 2.61073 | 1.38445 | 2.61073 |
|            | ---          | 2.31E-05 | 22.5007 | 11.7887 | 10.4042 | 2.61068 | 1.38443 | 2.61068 |
|            | ---          | 0.005092 | 5.56955 | 4.56609 | 3.18303 | 2.60822 | 1.38307 | 2.60822 |
| MacroD2    | NM_028387    | 0.0007   | 9.44839 | 6.29665 | 4.91537 | 2.60499 | 1.38128 | 2.60499 |
| Irf1       | NM_008390    | 0.003954 | 5.97015 | 9.14553 | 7.7658  | 2.60219 | 1.37973 | 2.60219 |
| Tra2a      | AB052758     | 0.00155  | 7.67389 | 7.4618  | 6.08293 | 2.60064 | 1.37887 | 2.60064 |
| Tle4       | NM_011600    | 0.000921 | 8.79602 | 6.76819 | 5.39241 | 2.59508 | 1.37578 | 2.59508 |
| Dhcr7      | NM_007856    | 0.002571 | 6.70801 | 7.49529 | 6.11967 | 2.59479 | 1.37562 | 2.59479 |
| Tmem171    | NM_001025606 | 7.01E-05 | 17.0077 | 6.54714 | 5.17365 | 2.59097 | 1.37349 | 2.59097 |
| Smarcd1    | NM_031842    | 0.003273 | 6.28517 | 7.67512 | 6.30276 | 2.58894 | 1.37236 | 2.58894 |
| Gata3      | NM_008091    | 0.00095  | 8.72527 | 6.10841 | 4.73728 | 2.58673 | 1.37113 | 2.58673 |
| Cpeb3      | NM_198300    | 0.000665 | 9.57531 | 5.66125 | 4.29058 | 2.5859  | 1.37067 | 2.5859  |
| Ces2g      | NM_197999    | 0.002465 | 6.78412 | 7.17448 | 5.80634 | 2.58136 | 1.36813 | 2.58136 |
| Spred2     | NM_033523    | 0.000226 | 12.6341 | 8.53347 | 7.16591 | 2.58033 | 1.36756 | 2.58033 |
| Ccnt2      | NM_028399    | 0.001117 | 8.36454 | 9.42001 | 8.05264 | 2.57999 | 1.36737 | 2.57999 |
| Chd7       | NM_001081417 | 0.001835 | 7.33881 | 4.30329 | 2.93613 | 2.57963 | 1.36716 | 2.57963 |
| Ankrd13c   | NM_001013806 | 0.000436 | 10.6776 | 9.24749 | 7.88113 | 2.57818 | 1.36636 | 2.57818 |
| Polr3h     | NM_030229    | 0.000421 | 10.7728 | 7.27279 | 5.90805 | 2.57529 | 1.36473 | 2.57529 |
| Tpra1      | NM_011906    | 0.000154 | 13.9295 | 9.43662 | 8.07408 | 2.57138 | 1.36254 | 2.57138 |
| Lrrc8b     | NM_001033550 | 0.001535 | 7.69418 | 7.02696 | 5.66561 | 2.56926 | 1.36135 | 2.56926 |
| Pnpla2     | NR_028142    | 0.003622 | 6.11453 | 7.98432 | 6.62324 | 2.56878 | 1.36108 | 2.56878 |
| D4Bwg0951e | BC030404     | 0.005542 | 5.44016 | 7.90317 | 6.54218 | 2.56861 | 1.36099 | 2.56861 |
| Atp2a3     | NM_016745    | 0.00019  | 13.1964 | 6.45744 | 5.09864 | 2.56472 | 1.3588  | 2.56472 |
| Gm340      | AK145489     | 0.003599 | 6.12522 | 6.92693 | 5.56822 | 2.56456 | 1.35871 | 2.56456 |
| Tfric      | NM_011638    | 0.006479 | 5.20825 | 9.67404 | 8.31699 | 2.56162 | 1.35706 | 2.56162 |
| Tbc1d4     | NM_001081278 | 0.000118 | 14.8966 | 6.37811 | 5.0211  | 2.56154 | 1.35701 | 2.56154 |
| Tes        | NM_207176    | 0.002171 | 7.01776 | 10.0583 | 8.70348 | 2.55762 | 1.3548  | 2.55762 |
| Tjap1      | NM_028751    | 5.42E-05 | 18.1454 | 7.71092 | 6.35641 | 2.55711 | 1.35451 | 2.55711 |
| Chd7       | NM_001081417 | 0.001422 | 7.85088 | 6.80194 | 5.44795 | 2.55617 | 1.35398 | 2.55617 |

|         |              |          |         |         |         |         |         |         |
|---------|--------------|----------|---------|---------|---------|---------|---------|---------|
| Pde8a   | NM_008803    | 0.000328 | 11.485  | 8.32749 | 6.97389 | 2.5555  | 1.35361 | 2.5555  |
| Parp10  | NM_001163575 | 6.98E-05 | 17.0267 | 8.03387 | 6.68563 | 2.54602 | 1.34825 | 2.54602 |
| Rnd1    | NM_172612    | 0.005774 | 5.37853 | 7.17855 | 5.83051 | 2.54565 | 1.34804 | 2.54565 |
| Hbegf   | NM_010415    | 0.004385 | 5.80364 | 8.70168 | 7.35523 | 2.54285 | 1.34645 | 2.54285 |
| Rasal2  | NM_177644    | 4.52E-05 | 19.0021 | 6.82556 | 5.4792  | 2.54269 | 1.34636 | 2.54269 |
| Syne2   | NM_001005510 | 0.000885 | 8.8897  | 6.50179 | 5.15582 | 2.54201 | 1.34597 | 2.54201 |
| Zfp93   | NM_009567    | 0.002724 | 6.60439 | 7.10234 | 5.75793 | 2.53926 | 1.34441 | 2.53926 |
| Gpr141  | NM_181754    | 0.000889 | 8.87909 | 4.27473 | 2.93045 | 2.53904 | 1.34429 | 2.53904 |
| Tmcc3   | NM_172051    | 0.000182 | 13.3523 | 6.53027 | 5.18754 | 2.53632 | 1.34274 | 2.53632 |
| Fam126a | NM_053090    | 0.000584 | 9.89955 | 8.89259 | 7.55    | 2.53606 | 1.34259 | 2.53606 |
| Fryl    | NM_028194    | 0.002042 | 7.13353 | 7.98085 | 6.63967 | 2.53358 | 1.34118 | 2.53358 |
| Wwc2    | NM_133791    | 8.60E-05 | 16.1473 | 8.92326 | 7.58286 | 2.53223 | 1.34041 | 2.53223 |
| Hdgfrp3 | NM_013886    | 0.001346 | 7.96565 | 6.81042 | 5.47005 | 2.53216 | 1.34037 | 2.53216 |
| Cntnap4 | NM_130457    | 0.004553 | 5.74396 | 6.11857 | 4.77824 | 2.5321  | 1.34034 | 2.5321  |
| Fam117b | NM_001037725 | 0.00215  | 7.03656 | 7.98977 | 6.65053 | 2.53019 | 1.33924 | 2.53019 |
| Trmt12  | NM_026642    | 0.004895 | 5.63033 | 7.06402 | 5.72535 | 2.52918 | 1.33867 | 2.52918 |
| Fam83h  | NM_134087    | 0.000775 | 9.20269 | 6.63346 | 5.29629 | 2.52654 | 1.33716 | 2.52654 |
| Galnt7  | NM_144731    | 0.000204 | 12.9717 | 8.23489 | 6.9008  | 2.52117 | 1.33409 | 2.52117 |
| Fgyy    | NM_001113412 | 0.003857 | 6.01092 | 7.06921 | 5.73608 | 2.51949 | 1.33313 | 2.51949 |
| Slc5a8  | NM_145423    | 0.000531 | 10.1458 | 5.90224 | 4.57072 | 2.51667 | 1.33152 | 2.51667 |
| Clstn1  | NM_023051    | 0.000183 | 13.3314 | 9.65759 | 8.32673 | 2.51554 | 1.33087 | 2.51554 |
| Papolg  | NM_172555    | 0.004139 | 5.89595 | 8.10977 | 6.78074 | 2.51235 | 1.32904 | 2.51235 |
| Unc119  | NM_011676    | 0.001476 | 7.77377 | 8.6326  | 7.30434 | 2.511   | 1.32826 | 2.511   |
|         | ---          | 0.005783 | 5.37616 | 8.65222 | 7.3247  | 2.5097  | 1.32752 | 2.5097  |
| Cttnal1 | NM_018761    | 0.001621 | 7.5843  | 8.22187 | 6.89654 | 2.5059  | 1.32533 | 2.5059  |
| Pik3r3  | NM_181585    | 0.003613 | 6.11856 | 7.91467 | 6.59106 | 2.50292 | 1.32362 | 2.50292 |
| Gmpr    | NM_025508    | 0.000804 | 9.11279 | 6.79989 | 5.47786 | 2.50018 | 1.32203 | 2.50018 |
| Ddx58   | NM_172689    | 5.35E-05 | 18.2089 | 9.09901 | 7.77723 | 2.49974 | 1.32178 | 2.49974 |
|         | ---          | 0.005104 | 5.56594 | 8.27143 | 6.94978 | 2.49951 | 1.32164 | 2.49951 |
| Fut8    | NM_016893    | 0.000474 | 10.4485 | 8.18128 | 6.86085 | 2.49741 | 1.32043 | 2.49741 |
| Pigs    | NM_201406    | 7.16E-05 | 16.9155 | 9.10149 | 7.78209 | 2.49562 | 1.3194  | 2.49562 |

|          |              |          |         |         |         |         |         |         |
|----------|--------------|----------|---------|---------|---------|---------|---------|---------|
| Krtap1-5 | NM_027157    | 0.002291 | 6.91809 | 4.53353 | 3.21463 | 2.49476 | 1.3189  | 2.49476 |
| Ppp1r13b | NM_011625    | 0.000112 | 15.0947 | 6.77982 | 5.46121 | 2.49427 | 1.31862 | 2.49427 |
| Kbtbd8   | NM_001008785 | 0.000236 | 12.4979 | 5.17247 | 3.85393 | 2.49414 | 1.31854 | 2.49414 |
| Tgtp1    | NM_011579    | 0.003764 | 6.0511  | 5.79245 | 4.47426 | 2.49353 | 1.31819 | 2.49353 |
| Eme2     | NM_001163102 | 0.000636 | 9.68455 | 8.31961 | 7.00472 | 2.48784 | 1.31489 | 2.48784 |
| Marveld1 | NM_183195    | 3.32E-05 | 20.5436 | 10.2018 | 8.88834 | 2.48542 | 1.31349 | 2.48542 |
| Tle1     | NM_011599    | 0.001946 | 7.22526 | 7.4122  | 6.09913 | 2.48468 | 1.31306 | 2.48468 |
| Pus10    | NM_028304    | 0.000512 | 10.2411 | 8.84806 | 7.53521 | 2.48431 | 1.31285 | 2.48431 |
| Capn5    | NM_007602    | 0.000451 | 10.5839 | 8.13731 | 6.82531 | 2.48284 | 1.31199 | 2.48284 |
| Rad21    | NM_009009    | 3.20E-05 | 20.722  | 10.8478 | 9.53605 | 2.4825  | 1.31179 | 2.4825  |
| Dtna     | NM_207650    | 0.00323  | 6.30767 | 7.14446 | 5.83477 | 2.47888 | 1.30969 | 2.47888 |
| Nap1l3   | NM_138742    | 0.00069  | 9.48394 | 5.35501 | 4.04533 | 2.47886 | 1.30968 | 2.47886 |
| P2rx7    | NM_011027    | 0.002732 | 6.59905 | 7.65232 | 6.34292 | 2.47837 | 1.30939 | 2.47837 |
| Tmem20   | NM_175507    | 0.000795 | 9.14053 | 7.6378  | 6.32939 | 2.47669 | 1.30841 | 2.47669 |
| Slc4a8   | NM_021530    | 0.000139 | 14.2986 | 6.94179 | 5.63431 | 2.47509 | 1.30748 | 2.47509 |
|          | ---          | 0.000621 | 9.74437 | 8.30436 | 6.99816 | 2.47291 | 1.30621 | 2.47291 |
| Gm13154  | NM_001014397 | 0.003481 | 6.18116 | 4.11743 | 2.81137 | 2.47266 | 1.30606 | 2.47266 |
| Madd     | NM_001177721 | 0.001136 | 8.32697 | 6.28049 | 4.97492 | 2.47181 | 1.30557 | 2.47181 |
| Nup155   | NM_133227    | 0.005675 | 5.40445 | 8.96526 | 7.66018 | 2.47097 | 1.30508 | 2.47097 |
| Aox1     | NM_009676    | 9.03E-05 | 15.9496 | 9.54353 | 8.24172 | 2.46539 | 1.30181 | 2.46539 |
| Gm10351  | AB010332     | 0.000237 | 12.4851 | 5.88152 | 4.58135 | 2.46259 | 1.30018 | 2.46259 |
| Slc12a5  | NM_020333    | 9.87E-06 | 27.8624 | 6.42985 | 5.13069 | 2.46086 | 1.29916 | 2.46086 |
|          | ---          | 0.003899 | 5.9932  | 6.00686 | 4.70773 | 2.4608  | 1.29913 | 2.4608  |
| Ccdc88c  | NM_026681    | 0.000992 | 8.62782 | 6.33919 | 5.04008 | 2.46077 | 1.29911 | 2.46077 |
| Plekhg1  | NM_001033253 | 0.001128 | 8.34356 | 5.34076 | 4.04246 | 2.45939 | 1.2983  | 2.45939 |
| Snx16    | NM_029068    | 4.20E-05 | 19.3538 | 7.79923 | 6.50131 | 2.45874 | 1.29792 | 2.45874 |
| Rasa4    | NM_133914    | 0.002389 | 6.84082 | 7.2585  | 5.96235 | 2.45574 | 1.29616 | 2.45574 |
| Ccdc92   | NM_144819    | 0.002108 | 7.07372 | 7.25266 | 5.95714 | 2.45466 | 1.29552 | 2.45466 |
| Fryl     | NM_028194    | 0.002357 | 6.86603 | 7.54553 | 6.25182 | 2.45158 | 1.29371 | 2.45158 |
| Mcm8     | NM_025676    | 0.004181 | 5.87967 | 6.58236 | 5.28939 | 2.45032 | 1.29297 | 2.45032 |
| Rab27b   | NM_001082553 | 0.001685 | 7.50676 | 6.25397 | 4.96166 | 2.4492  | 1.29231 | 2.4492  |



|          |                        |          |         |         |         |         |         |         |
|----------|------------------------|----------|---------|---------|---------|---------|---------|---------|
| Fryl     | NM_028194              | 0.000554 | 10.0393 | 8.62333 | 7.3313  | 2.44871 | 1.29202 | 2.44871 |
| Tmem37   | NM_019432              | 0.004244 | 5.85577 | 6.34861 | 5.06199 | 2.43955 | 1.28662 | 2.43955 |
| Fgyy     | NM_001113412           | 0.006519 | 5.19944 | 6.47516 | 5.18886 | 2.43901 | 1.2863  | 2.43901 |
| Insl6    | NM_013754              | 0.006423 | 5.22091 | 6.09033 | 4.8053  | 2.43687 | 1.28503 | 2.43687 |
| Tgtp1    | NM_011579              | 0.005201 | 5.5368  | 5.39262 | 4.10761 | 2.43685 | 1.28502 | 2.43685 |
| Tbc1d1   | NM_019636              | 0.002771 | 6.57407 | 8.1556  | 6.87087 | 2.43636 | 1.28473 | 2.43636 |
| Pde7a    | NM_001122759           | 0.004804 | 5.65977 | 8.486   | 7.20403 | 2.4317  | 1.28197 | 2.4317  |
| Gltpd1   | NM_024472              | 0.000185 | 13.2866 | 7.54383 | 6.26269 | 2.43031 | 1.28114 | 2.43031 |
| Gm13051  | NM_001037926           | 0.00148  | 7.76822 | 8.90374 | 7.62354 | 2.42872 | 1.28019 | 2.42872 |
| Cdc25b   | NM_023117              | 0.000992 | 8.62935 | 7.31622 | 6.03656 | 2.42783 | 1.27967 | 2.42783 |
| Capn11   | NM_001013767           | 0.001289 | 8.0557  | 5.34794 | 4.0696  | 2.4256  | 1.27834 | 2.4256  |
| Rbm38    | NM_019547              | 0.000354 | 11.2643 | 7.59414 | 6.31614 | 2.42502 | 1.278   | 2.42502 |
| Rasa3    | NM_009025              | 0.005958 | 5.3318  | 9.44138 | 8.16502 | 2.42228 | 1.27637 | 2.42228 |
| Lipo1    | NM_001013770           | 0.000494 | 10.3392 | 7.68673 | 6.41133 | 2.42064 | 1.27539 | 2.42064 |
|          | ---                    | 0.001478 | 7.77179 | 7.17152 | 5.8964  | 2.4202  | 1.27513 | 2.4202  |
| Rpp30    | NM_019428              | 0.000368 | 11.1526 | 8.65661 | 7.38165 | 2.41992 | 1.27496 | 2.41992 |
| Dock3    | NM_153413              | 3.94E-05 | 19.6686 | 5.30534 | 4.03068 | 2.41942 | 1.27466 | 2.41942 |
| BC034902 | BC034902               | 0.000921 | 8.79618 | 5.55423 | 4.28049 | 2.41787 | 1.27374 | 2.41787 |
| Gm962    | BC147482               | 0.004048 | 5.93197 | 6.60319 | 5.32982 | 2.41726 | 1.27337 | 2.41726 |
| Flrt3    | NM_001172160           | 0.001918 | 7.2531  | 6.2212  | 4.9479  | 2.41714 | 1.2733  | 2.41714 |
| Tspan14  | NM_145928              | 4.21E-05 | 19.3451 | 8.64513 | 7.37207 | 2.41674 | 1.27306 | 2.41674 |
| Slc12a7  | NM_011390              | 0.000183 | 13.3243 | 7.21153 | 5.9389  | 2.41601 | 1.27263 | 2.41601 |
| Ppp3ca   | NM_008913              | 0.000148 | 14.0772 | 10.5869 | 9.31485 | 2.41503 | 1.27204 | 2.41503 |
| Ormdl2   | NM_024180              | 0.00288  | 6.506   | 7.3592  | 6.09079 | 2.40895 | 1.2684  | 2.40895 |
| Prkar2b  | NM_011158              | 0.005791 | 5.37424 | 8.62361 | 7.3563  | 2.40713 | 1.26731 | 2.40713 |
| Prkaa2   | NM_178143              | 0.003129 | 6.36216 | 6.02536 | 4.75975 | 2.40429 | 1.26561 | 2.40429 |
| Gm2049   | ENSMUST0000010897<br>8 | 0.001533 | 7.6971  | 5.19292 | 3.92893 | 2.4016  | 1.264   | 2.4016  |
| Gm2049   | ENSMUST0000010897<br>8 | 0.001533 | 7.6971  | 5.19292 | 3.92893 | 2.4016  | 1.264   | 2.4016  |
| Ccdc43   | NM_025918              | 0.001198 | 8.21357 | 7.306   | 6.04275 | 2.40036 | 1.26325 | 2.40036 |
|          | ---                    | 0.001758 | 7.42363 | 6.4054  | 5.14268 | 2.39947 | 1.26271 | 2.39947 |

|               |                    |          |         |         |         |         |         |         |
|---------------|--------------------|----------|---------|---------|---------|---------|---------|---------|
| Gramd4        | NM_172611          | 0.001092 | 8.41467 | 8.84931 | 7.58767 | 2.39768 | 1.26164 | 2.39768 |
| Mir181b-1     | NR_029820          | 0.001516 | 7.71903 | 5.83574 | 4.5756  | 2.39518 | 1.26014 | 2.39518 |
| ErbB3         | NM_010153          | 0.003104 | 6.37601 | 6.15679 | 4.90042 | 2.38894 | 1.25637 | 2.38894 |
| Mrpl45        | NM_025927          | 0.001208 | 8.19512 | 8.67709 | 7.42109 | 2.38832 | 1.256   | 2.38832 |
| Rnpepl1       | NM_181405          | 0.000528 | 10.1623 | 7.32985 | 6.07478 | 2.38679 | 1.25507 | 2.38679 |
| Spred3        | NM_182927          | 2.66E-05 | 21.7105 | 7.23367 | 5.97891 | 2.38628 | 1.25476 | 2.38628 |
| Ptpn4         | NM_019933          | 0.00282  | 6.54298 | 6.68865 | 5.43394 | 2.3862  | 1.25471 | 2.3862  |
| Pik3ip1       | NM_178149          | 0.002253 | 6.94871 | 8.66084 | 7.40743 | 2.38404 | 1.25341 | 2.38404 |
| Ces2d-ps      | NR_033726          | 0.001039 | 8.52438 | 5.966   | 4.71373 | 2.38215 | 1.25227 | 2.38215 |
| Gm14430       | NM_001100415       | 0.002521 | 6.74323 | 9.31752 | 8.06576 | 2.38133 | 1.25176 | 2.38133 |
|               | 1E+08 NM_001099327 | 0.002521 | 6.74323 | 9.31752 | 8.06576 | 2.38133 | 1.25176 | 2.38133 |
|               | ENSMUST0000010899  |          |         |         |         |         |         |         |
| 0610010B08Rik | 1                  | 0.002521 | 6.74323 | 9.31752 | 8.06576 | 2.38133 | 1.25176 | 2.38133 |
|               | 1E+08 NM_001099327 | 0.002521 | 6.74323 | 9.31752 | 8.06576 | 2.38133 | 1.25176 | 2.38133 |
| Vmn1r43       | NM_053220          | 0.001301 | 8.03721 | 4.37405 | 3.12496 | 2.37692 | 1.24909 | 2.37692 |
| Cdyl2         | NM_029441          | 0.001987 | 7.18556 | 6.91667 | 5.67029 | 2.37245 | 1.24638 | 2.37245 |
|               | ---                | 0.002453 | 6.79253 | 9.32121 | 8.07712 | 2.3687  | 1.24409 | 2.3687  |
| Map3k4        | NM_011948          | 0.000591 | 9.87063 | 7.86004 | 6.61604 | 2.36854 | 1.244   | 2.36854 |
| Lpcat4        | NM_207206          | 6.61E-05 | 17.2601 | 7.63776 | 6.39397 | 2.36819 | 1.24379 | 2.36819 |
| Shroom3       | NM_015756          | 0.006496 | 5.20461 | 6.05755 | 4.81388 | 2.36799 | 1.24366 | 2.36799 |
| Chchd3        | NM_025336          | 0.000134 | 14.425  | 9.50982 | 8.26631 | 2.36774 | 1.24351 | 2.36774 |
|               | ---                | 0.003364 | 6.23837 | 7.79645 | 6.55368 | 2.36652 | 1.24277 | 2.36652 |
| Syne2         | NM_001005510       | 0.001809 | 7.36736 | 6.67353 | 5.43181 | 2.36482 | 1.24173 | 2.36482 |
| Ddx52         | NM_030096          | 0.003555 | 6.14555 | 9.02387 | 7.7829  | 2.36358 | 1.24097 | 2.36358 |
| Zfp110        | NM_022981          | 0.000148 | 14.0735 | 8.77939 | 7.53925 | 2.36222 | 1.24014 | 2.36222 |
| Grina         | NM_023168          | 0.000615 | 9.7717  | 11.2113 | 9.97213 | 2.36066 | 1.23919 | 2.36066 |
| 1700010I14Rik | NM_025851          | 0.000132 | 14.4835 | 5.43487 | 4.19652 | 2.35928 | 1.23835 | 2.35928 |
| Gjb3          | NM_008126          | 0.003696 | 6.08098 | 6.22624 | 4.98997 | 2.35589 | 1.23627 | 2.35589 |
| Calcoco1      | NM_026192          | 0.001929 | 7.24243 | 9.95573 | 8.71958 | 2.3557  | 1.23615 | 2.3557  |
|               | ---                | 0.005955 | 5.33261 | 6.00345 | 4.76786 | 2.35476 | 1.23558 | 2.35476 |
| Vegfc         | NM_009506          | 0.002692 | 6.62563 | 8.09335 | 6.85866 | 2.35332 | 1.2347  | 2.35332 |

|               |                        |          |         |         |         |         |         |         |
|---------------|------------------------|----------|---------|---------|---------|---------|---------|---------|
| Sik1          | NM_010831              | 0.002596 | 6.69052 | 9.11572 | 7.8828  | 2.35042 | 1.23292 | 2.35042 |
| Cyb5b         | NM_025558              | 8.96E-05 | 15.9828 | 9.93692 | 8.70461 | 2.34943 | 1.23231 | 2.34943 |
|               | ---                    | 0.001516 | 7.71955 | 8.88093 | 7.64873 | 2.34925 | 1.2322  | 2.34925 |
| Zfp111        | NM_019940              | 0.001371 | 7.92684 | 6.77573 | 5.54429 | 2.34801 | 1.23144 | 2.34801 |
| Fbxl16        | NM_001164225           | 0.000743 | 9.30185 | 6.44165 | 5.21095 | 2.3468  | 1.2307  | 2.3468  |
| Lrp8          | NR_033496              | 0.00686  | 5.12556 | 6.80444 | 5.57441 | 2.34573 | 1.23004 | 2.34573 |
| Suz12         | NM_199196              | 0.002808 | 6.55034 | 9.06352 | 7.83411 | 2.3447  | 1.22941 | 2.3447  |
| Tead2         | NM_011565              | 0.00045  | 10.5897 | 8.63629 | 7.4071  | 2.34435 | 1.22919 | 2.34435 |
| Gm10009       | ENSMUST0000007105<br>9 | 0.000169 | 13.6014 | 5.34958 | 4.12068 | 2.34388 | 1.2289  | 2.34388 |
| Zbtb10        | NM_177660              | 0.002549 | 6.72313 | 7.91508 | 6.68786 | 2.34116 | 1.22722 | 2.34116 |
| Scly          | NM_016717              | 0.003688 | 6.0846  | 7.17168 | 5.9445  | 2.34108 | 1.22718 | 2.34108 |
|               | ---                    | 0.001374 | 7.92228 | 9.59968 | 8.37357 | 2.33935 | 1.22611 | 2.33935 |
| Gm10752       | ENSMUST0000009926<br>8 | 0.001373 | 7.92387 | 4.83651 | 3.61046 | 2.33925 | 1.22605 | 2.33925 |
| Plekhg5       | NM_001004156           | 0.002211 | 6.98363 | 7.38612 | 6.1616  | 2.33677 | 1.22452 | 2.33677 |
| Tshz2         | NM_080455              | 0.004646 | 5.71208 | 5.91967 | 4.69619 | 2.33509 | 1.22348 | 2.33509 |
| Dcakd         | NM_026551              | 3.57E-06 | 35.956  | 8.67118 | 7.44805 | 2.33453 | 1.22313 | 2.33453 |
| Alcam         | NM_009655              | 0.006279 | 5.25419 | 7.76321 | 6.54022 | 2.3343  | 1.22299 | 2.3343  |
| Rhov          | NM_145530              | 0.00245  | 6.79458 | 6.51712 | 5.29416 | 2.33425 | 1.22296 | 2.33425 |
| Phka2         | NM_172783              | 0.005024 | 5.59011 | 7.35728 | 6.13654 | 2.33067 | 1.22075 | 2.33067 |
|               | ---                    | 0.001752 | 7.43008 | 9.62496 | 8.40459 | 2.33006 | 1.22037 | 2.33006 |
| Slc37a2       | NM_001145960           | 0.006755 | 5.14778 | 6.63656 | 5.41761 | 2.32777 | 1.21895 | 2.32777 |
| Dlx2          | NM_010054              | 0.000742 | 9.30577 | 7.29508 | 6.07918 | 2.32287 | 1.21591 | 2.32287 |
|               | ---                    | 0.000208 | 12.9101 | 6.49806 | 5.28281 | 2.32182 | 1.21526 | 2.32182 |
| Abtb2         | NM_178890              | 0.000313 | 11.6274 | 7.60681 | 6.39214 | 2.32088 | 1.21467 | 2.32088 |
| 1110002L01Rik | NR_030694              | 0.002933 | 6.47446 | 7.34933 | 6.13708 | 2.31698 | 1.21224 | 2.31698 |
| Tmem106c      | NM_201359              | 0.002417 | 6.81955 | 7.77134 | 6.55972 | 2.31597 | 1.21162 | 2.31597 |
| C030034I22Rik | NR_026848              | 0.000199 | 13.0487 | 5.79573 | 4.58412 | 2.31595 | 1.2116  | 2.31595 |
| L3mbtl2       | NM_145993              | 0.00098  | 8.65483 | 7.67064 | 6.45954 | 2.31515 | 1.2111  | 2.31515 |
| Myst2         | NM_001195003           | 9.70E-06 | 27.9858 | 9.77149 | 8.56046 | 2.31504 | 1.21104 | 2.31504 |
|               | ---                    | 0.002556 | 6.71834 | 5.71307 | 4.50244 | 2.31439 | 1.21063 | 2.31439 |

|               |              |          |         |         |         |         |         |         |
|---------------|--------------|----------|---------|---------|---------|---------|---------|---------|
| 2610318N02Rik | BC039993     | 0.003111 | 6.37204 | 5.44383 | 4.23323 | 2.31434 | 1.2106  | 2.31434 |
| Gpr56         | NM_018882    | 8.67E-05 | 16.1155 | 6.51082 | 5.30088 | 2.31329 | 1.20995 | 2.31329 |
| Erbp2         | NM_001003817 | 2.10E-05 | 23.0464 | 7.85235 | 6.64354 | 2.31146 | 1.20881 | 2.31146 |
| Tmem63b       | NM_198167    | 0.000364 | 11.1829 | 8.05435 | 6.84646 | 2.30999 | 1.20788 | 2.30999 |
| Abr           | NM_198895    | 0.002686 | 6.62956 | 9.32049 | 8.11278 | 2.30971 | 1.20771 | 2.30971 |
| Cpeb4         | NM_026252    | 0.001663 | 7.53282 | 9.02988 | 7.82235 | 2.30941 | 1.20752 | 2.30941 |
|               | ---          | 0.000635 | 9.68856 | 5.82692 | 4.61955 | 2.30918 | 1.20738 | 2.30918 |
| Actl6a        | NM_019673    | 0.000245 | 12.3725 | 8.5106  | 7.30353 | 2.30867 | 1.20706 | 2.30867 |
| Pcx           | NM_001162946 | 0.000346 | 11.3283 | 7.90305 | 6.69711 | 2.30688 | 1.20594 | 2.30688 |
| A530032D15Rik | BC094285     | 0.00183  | 7.34438 | 6.30246 | 5.0969  | 2.30628 | 1.20556 | 2.30628 |
| Lamb3         | NM_008484    | 0.001168 | 8.26793 | 6.41213 | 5.20669 | 2.30608 | 1.20544 | 2.30608 |
| Ermp1         | NM_001081213 | 0.000345 | 11.3373 | 9.25042 | 8.04541 | 2.3054  | 1.20501 | 2.3054  |
| Zhx2          | NM_199449    | 0.000673 | 9.5461  | 8.11662 | 6.91199 | 2.3048  | 1.20464 | 2.3048  |
| Pknox2        | NM_001029838 | 0.000337 | 11.4077 | 5.31932 | 4.11888 | 2.2981  | 1.20044 | 2.2981  |
| Sgca          | NM_009161    | 0.000168 | 13.6358 | 6.04142 | 4.84133 | 2.29754 | 1.20009 | 2.29754 |
|               | ---          | 0.001627 | 7.57634 | 9.29678 | 8.09745 | 2.29634 | 1.19934 | 2.29634 |
| Vamp1         | NM_001080557 | 0.000767 | 9.2262  | 6.9016  | 5.70238 | 2.29615 | 1.19922 | 2.29615 |
| Plcd1         | NM_019676    | 0.00013  | 14.5432 | 8.66571 | 7.46661 | 2.29597 | 1.1991  | 2.29597 |
| Slc43a2       | NM_173388    | 0.002821 | 6.54265 | 6.87639 | 5.67914 | 2.29303 | 1.19726 | 2.29303 |
| Slc6a12       | NM_133661    | 0.001294 | 8.04842 | 6.4445  | 5.24753 | 2.29257 | 1.19697 | 2.29257 |
|               | ---          | 0.001324 | 7.99919 | 5.04074 | 3.84506 | 2.29053 | 1.19568 | 2.29053 |
| Tmem199       | NM_199199    | 0.000551 | 10.0509 | 8.10013 | 6.9048  | 2.28998 | 1.19533 | 2.28998 |
| Grik5         | NM_008168    | 0.000177 | 13.4536 | 7.29866 | 6.1039  | 2.28907 | 1.19476 | 2.28907 |
| Endod1        | NM_028013    | 3.16E-05 | 20.7906 | 7.4063  | 6.21217 | 2.28806 | 1.19413 | 2.28806 |
| Smc4          | NM_133786    | 0.00698  | 5.10061 | 8.74245 | 7.54905 | 2.28691 | 1.1934  | 2.28691 |
| Tns1          | NM_027884    | 0.002254 | 6.94843 | 9.21094 | 8.01771 | 2.28664 | 1.19323 | 2.28664 |
| Polr2k        | NM_001039368 | 0.000421 | 10.7744 | 8.5685  | 7.37565 | 2.28604 | 1.19285 | 2.28604 |
| Nfkbil2       | NM_183091    | 0.000493 | 10.3434 | 5.89056 | 4.69794 | 2.28568 | 1.19262 | 2.28568 |
| Utrn          | NM_011682    | 0.00259  | 6.6944  | 8.93763 | 7.74517 | 2.28542 | 1.19246 | 2.28542 |
| Pfkm          | NM_001163487 | 3.69E-05 | 20.0042 | 10.1691 | 8.97666 | 2.28539 | 1.19244 | 2.28539 |
| Pigq          | NM_011822    | 8.67E-05 | 16.1178 | 8.5895  | 7.3975  | 2.28469 | 1.192   | 2.28469 |

|               |                        |          |         |         |         |         |         |         |
|---------------|------------------------|----------|---------|---------|---------|---------|---------|---------|
| Tpd52         | NM_001025261           | 0.001959 | 7.21296 | 5.25036 | 4.05883 | 2.28395 | 1.19153 | 2.28395 |
| 2410066E13Rik | BC042507               | 0.003611 | 6.11953 | 7.31626 | 6.12512 | 2.28333 | 1.19114 | 2.28333 |
|               | ---                    | 0.003005 | 6.43222 | 9.40387 | 8.21406 | 2.28123 | 1.18981 | 2.28123 |
| 2810001A02Rik | AK012625               | 0.001148 | 8.30512 | 8.35041 | 7.16136 | 2.28003 | 1.18905 | 2.28003 |
| Mif4gd        | NR_029442              | 0.000932 | 8.77056 | 7.90173 | 6.71317 | 2.27925 | 1.18856 | 2.27925 |
| Tmem65        | NM_175212              | 0.002058 | 7.11887 | 8.75884 | 7.57087 | 2.27832 | 1.18797 | 2.27832 |
| Morc3         | NM_001045529           | 0.003794 | 6.03788 | 8.9605  | 7.77278 | 2.27794 | 1.18773 | 2.27794 |
| Prepl         | NM_001163622           | 6.53E-05 | 17.3119 | 9.41138 | 8.22372 | 2.27783 | 1.18766 | 2.27783 |
|               | ---                    | 0.000137 | 14.3377 | 10.3485 | 9.1619  | 2.27623 | 1.18665 | 2.27623 |
| Dennd1b       | NM_001166501           | 0.001668 | 7.52663 | 7.3488  | 6.16257 | 2.27558 | 1.18624 | 2.27558 |
| Ttll12        | NM_183017              | 0.000236 | 12.4972 | 8.90159 | 7.71595 | 2.27464 | 1.18564 | 2.27464 |
| Acsl3         | NM_028817              | 0.000701 | 9.44396 | 8.40877 | 7.22322 | 2.27449 | 1.18554 | 2.27449 |
| Cxcl10        | NM_021274              | 0.005547 | 5.43889 | 6.60037 | 5.41707 | 2.27095 | 1.1833  | 2.27095 |
| Ccl25         | NM_009138              | 0.000365 | 11.178  | 6.79722 | 5.61713 | 2.26592 | 1.1801  | 2.26592 |
| Orc2          | NM_008765              | 0.001221 | 8.17217 | 8.22325 | 7.0433  | 2.2657  | 1.17996 | 2.2657  |
| Dvl1          | NM_010091              | 0.000103 | 15.4189 | 8.59949 | 7.42046 | 2.26424 | 1.17903 | 2.26424 |
| Nol4          | NM_001161483           | 0.001712 | 7.47491 | 4.89444 | 3.71543 | 2.2642  | 1.179   | 2.2642  |
| 9430007A20Rik | ENSMUST0000003032<br>8 | 0.004515 | 5.75714 | 5.74358 | 4.56468 | 2.26404 | 1.1789  | 2.26404 |
| Spns2         | NM_153060              | 0.000857 | 8.96495 | 6.66569 | 5.4873  | 2.26323 | 1.17838 | 2.26323 |
|               | ---                    | 0.000865 | 8.9433  | 3.61039 | 2.43454 | 2.25927 | 1.17586 | 2.25927 |
| Rnpep         | NM_145417              | 0.000312 | 11.6387 | 8.36528 | 7.18968 | 2.25886 | 1.1756  | 2.25886 |
| Arhgef3       | NM_027871              | 0.005215 | 5.53269 | 7.93822 | 6.76344 | 2.25758 | 1.17478 | 2.25758 |
| Phtf2         | NM_172992              | 0.000496 | 10.3301 | 7.37212 | 6.19793 | 2.25665 | 1.17419 | 2.25665 |
| Ccdc132       | NM_001167750           | 0.000181 | 13.3683 | 8.23893 | 7.0652  | 2.25595 | 1.17373 | 2.25595 |
| Btbd19        | NR_024078              | 0.000102 | 15.4684 | 7.09316 | 5.91952 | 2.2558  | 1.17364 | 2.2558  |
| Efna3         | NM_010108              | 0.003628 | 6.11198 | 6.69594 | 5.5226  | 2.25533 | 1.17334 | 2.25533 |
| A730017L22Rik | AK166222               | 8.62E-05 | 16.1393 | 6.6264  | 5.45371 | 2.25432 | 1.17269 | 2.25432 |
| 4931406P16Rik | BC060233               | 0.004876 | 5.63638 | 8.91836 | 7.7492  | 2.2488  | 1.16916 | 2.2488  |
| Gm9873        | ENSMUST0000006389<br>1 | 0.000421 | 10.7736 | 4.81372 | 3.64526 | 2.24771 | 1.16846 | 2.24771 |
| Ankib1        | NM_001003909           | 3.77E-05 | 19.8844 | 9.33708 | 8.17008 | 2.24545 | 1.167   | 2.24545 |

|          |              |          |         |         |         |         |         |         |
|----------|--------------|----------|---------|---------|---------|---------|---------|---------|
|          | ---          | 0.004085 | 5.91719 | 8.69892 | 7.53486 | 2.24087 | 1.16406 | 2.24087 |
| Cbln3    | NM_019820    | 0.000371 | 11.1259 | 5.74295 | 4.57974 | 2.23955 | 1.16321 | 2.23955 |
| Wwc1     | NM_170779    | 8.91E-05 | 16.0065 | 6.47976 | 5.3186  | 2.23637 | 1.16116 | 2.23637 |
| Hey1     | NM_010423    | 0.001744 | 7.43876 | 6.19187 | 5.03082 | 2.23621 | 1.16105 | 2.23621 |
| Syne2    | NM_001005510 | 0.00152  | 7.71451 | 6.42176 | 5.26211 | 2.23403 | 1.15965 | 2.23403 |
| Ankrd13b | NM_172945    | 0.000146 | 14.1105 | 7.67036 | 6.51105 | 2.23351 | 1.15931 | 2.23351 |
| Isg20    | NM_020583    | 0.000141 | 14.2362 | 8.43051 | 7.27141 | 2.23318 | 1.1591  | 2.23318 |
| Asap1    | NM_010026    | 0.00015  | 14.0171 | 9.95262 | 8.79394 | 2.23253 | 1.15868 | 2.23253 |
| Itgb5    | NM_001145884 | 0.000301 | 11.7381 | 11.3992 | 10.2423 | 2.22986 | 1.15695 | 2.22986 |
| Trim37   | NM_197987    | 0.000516 | 10.2213 | 9.03418 | 7.87755 | 2.22937 | 1.15664 | 2.22937 |
| Tsta3    | NM_031201    | 0.002528 | 6.73838 | 8.78549 | 7.63022 | 2.22726 | 1.15527 | 2.22726 |
| Abca5    | NM_147219    | 8.66E-06 | 28.7958 | 8.62188 | 7.46684 | 2.2269  | 1.15504 | 2.2269  |
|          | ---          | 0.001785 | 7.39318 | 4.73849 | 3.58364 | 2.22661 | 1.15485 | 2.22661 |
|          | ---          | 0.003032 | 6.41666 | 8.24478 | 7.09104 | 2.22489 | 1.15374 | 2.22489 |
| Thumpd3  | NM_008188    | 0.005559 | 5.43576 | 8.21583 | 7.0622  | 2.22473 | 1.15363 | 2.22473 |
|          | ---          | 0.006003 | 5.3207  | 9.15371 | 8.00048 | 2.22412 | 1.15323 | 2.22412 |
| Sf3a1    | NM_026175    | 9.18E-05 | 15.8827 | 8.30392 | 7.15073 | 2.22407 | 1.1532  | 2.22407 |
| Tspan32  | NM_020286    | 0.000437 | 10.6709 | 5.22328 | 4.0707  | 2.22312 | 1.15259 | 2.22312 |
| Inpp1    | NM_010567    | 0.000237 | 12.4784 | 9.6896  | 8.53723 | 2.22278 | 1.15237 | 2.22278 |
| Coro1c   | NM_011779    | 0.000592 | 9.86622 | 10.14   | 8.98923 | 2.22039 | 1.15081 | 2.22039 |
| Sbf1     | NM_001170561 | 0.000379 | 11.0665 | 9.39314 | 8.24303 | 2.2193  | 1.15011 | 2.2193  |
| Xrcc5    | NM_009533    | 0.00078  | 9.18651 | 9.1571  | 8.00768 | 2.21825 | 1.14942 | 2.21825 |
| Edem2    | NM_145537    | 0.000159 | 13.8252 | 7.84201 | 6.69328 | 2.21718 | 1.14873 | 2.21718 |
|          | ---          | 0.000637 | 9.68306 | 9.95175 | 8.80302 | 2.21718 | 1.14873 | 2.21718 |
| Rhbdd1   | NM_029777    | 0.003972 | 5.96291 | 9.1329  | 7.98517 | 2.21565 | 1.14773 | 2.21565 |
| Rsb1l    | NM_001080977 | 0.000148 | 14.0617 | 9.24822 | 8.10084 | 2.2151  | 1.14737 | 2.2151  |
| Tgfb1    | NM_011577    | 0.000389 | 10.9908 | 9.66841 | 8.52188 | 2.2138  | 1.14653 | 2.2138  |
| Tubg1    | NM_134024    | 0.000524 | 10.1833 | 8.59051 | 7.44675 | 2.20957 | 1.14376 | 2.20957 |
| Jakmip3  | NM_028708    | 0.003317 | 6.26233 | 5.66731 | 4.52498 | 2.20737 | 1.14233 | 2.20737 |
| Chd7     | NM_001081417 | 0.00061  | 9.78854 | 6.69278 | 5.5571  | 2.19722 | 1.13568 | 2.19722 |
| Myo7a    | NM_008663    | 0.000663 | 9.58154 | 8.88433 | 7.74902 | 2.19667 | 1.13532 | 2.19667 |

|               |              |          |         |         |         |         |         |         |
|---------------|--------------|----------|---------|---------|---------|---------|---------|---------|
| Slc26a2       | NM_007885    | 0.000258 | 12.2157 | 7.56185 | 6.42701 | 2.19595 | 1.13485 | 2.19595 |
| Catsper2      | NM_153075    | 0.003096 | 6.38013 | 6.07164 | 4.9375  | 2.19488 | 1.13414 | 2.19488 |
| Tcf7          | NM_009331    | 0.000658 | 9.60215 | 6.12708 | 4.99404 | 2.1932  | 1.13304 | 2.1932  |
| Rnasen        | NM_001130149 | 0.00198  | 7.19237 | 8.52232 | 7.38937 | 2.19307 | 1.13295 | 2.19307 |
| 2700078E11Rik | NM_030197    | 0.00012  | 14.8478 | 9.69733 | 8.5645  | 2.19288 | 1.13283 | 2.19288 |
| 4833420G17Rik | NM_001113550 | 0.000988 | 8.63854 | 9.14682 | 8.01403 | 2.19282 | 1.13279 | 2.19282 |
| Lrrc8d        | NM_178701    | 0.001382 | 7.90957 | 7.21836 | 6.08597 | 2.1922  | 1.13238 | 2.1922  |
|               | ---          | 0.003693 | 6.08256 | 6.1037  | 4.9714  | 2.19208 | 1.1323  | 2.19208 |
| Mink1         | NM_001045959 | 0.000543 | 10.088  | 8.13913 | 7.0086  | 2.18939 | 1.13053 | 2.18939 |
| Fgd6          | NM_053072    | 0.000425 | 10.7495 | 5.82837 | 4.69875 | 2.18801 | 1.12962 | 2.18801 |
| Sri           | NM_025618    | 2.65E-05 | 21.7446 | 9.97429 | 8.84679 | 2.1848  | 1.1275  | 2.1848  |
| Haghl         | NM_026897    | 0.000962 | 8.69803 | 7.83093 | 6.7043  | 2.18348 | 1.12663 | 2.18348 |
| Plekhh3       | NM_146030    | 0.005763 | 5.38138 | 7.6668  | 6.54025 | 2.18337 | 1.12655 | 2.18337 |
| Arf3          | NM_007478    | 0.000658 | 9.60147 | 9.85631 | 8.73079 | 2.1818  | 1.12552 | 2.1818  |
| Chn1          | NM_001113246 | 0.003008 | 6.43003 | 4.9628  | 3.83775 | 2.1811  | 1.12505 | 2.1811  |
| Osbpl2        | NM_144500    | 0.002343 | 6.87636 | 9.24689 | 8.12187 | 2.18106 | 1.12503 | 2.18106 |
|               | ---          | 0.004484 | 5.76792 | 5.06394 | 3.93952 | 2.18014 | 1.12442 | 2.18014 |
| Mdh1          | NM_008618    | 0.000109 | 15.2068 | 10.9745 | 9.85155 | 2.17792 | 1.12295 | 2.17792 |
| Apol7a        | NM_029419    | 0.002828 | 6.53786 | 4.52114 | 3.39886 | 2.17691 | 1.12228 | 2.17691 |
| Cotl1         | NM_028071    | 0.00102  | 8.56557 | 7.22657 | 6.10681 | 2.17312 | 1.11977 | 2.17312 |
| Ercc2         | NM_007949    | 0.000778 | 9.19249 | 7.04057 | 5.92183 | 2.17156 | 1.11873 | 2.17156 |
| Gpr89         | NM_026229    | 0.000328 | 11.4815 | 8.35465 | 7.23602 | 2.17141 | 1.11863 | 2.17141 |
| Tsc22d3       | NM_001077364 | 0.004368 | 5.80972 | 6.7556  | 5.63904 | 2.1683  | 1.11656 | 2.1683  |
| Dci           | NM_010023    | 9.54E-05 | 15.7309 | 9.23343 | 8.11716 | 2.16787 | 1.11628 | 2.16787 |
| Dgkd          | NM_177646    | 0.000651 | 9.62602 | 8.37299 | 7.25847 | 2.16523 | 1.11452 | 2.16523 |
| Snap47        | NM_144521    | 0.000704 | 9.43389 | 9.88383 | 8.76946 | 2.165   | 1.11437 | 2.165   |
| Spg20         | NM_144895    | 0.000522 | 10.1925 | 9.18062 | 8.06671 | 2.16432 | 1.11392 | 2.16432 |
| Rnf181        | NM_025607    | 0.000202 | 12.9929 | 9.77459 | 8.66087 | 2.16404 | 1.11373 | 2.16404 |
| Dsn1          | NM_025853    | 0.00495  | 5.61318 | 7.16444 | 6.05274 | 2.16099 | 1.11169 | 2.16099 |
| Wdr60         | NM_146039    | 0.002715 | 6.61029 | 6.84711 | 5.73578 | 2.16046 | 1.11134 | 2.16046 |
| Snx15         | NM_026912    | 8.79E-05 | 16.062  | 8.69491 | 7.5838  | 2.16011 | 1.11111 | 2.16011 |

|               |              |          |         |         |         |         |         |         |
|---------------|--------------|----------|---------|---------|---------|---------|---------|---------|
| Tlr3          | NM_126166    | 0.002505 | 6.75434 | 6.78022 | 5.67007 | 2.15868 | 1.11015 | 2.15868 |
| Cerk          | NM_145475    | 0.001996 | 7.17743 | 7.44438 | 6.33457 | 2.15818 | 1.10982 | 2.15818 |
| Traf4         | NM_009423    | 0.001614 | 7.59278 | 8.30487 | 7.19512 | 2.15808 | 1.10975 | 2.15808 |
| Cited2        | NM_010828    | 0.004387 | 5.80289 | 10.0612 | 8.95148 | 2.15807 | 1.10974 | 2.15807 |
| 9030418K01Rik | NM_001081289 | 0.001521 | 7.71288 | 6.42586 | 5.31891 | 2.1539  | 1.10695 | 2.1539  |
| Ppp1r9a       | NM_181595    | 0.000824 | 9.05722 | 5.65215 | 4.54721 | 2.1509  | 1.10494 | 2.1509  |
| Dhcr24        | NM_053272    | 0.006627 | 5.17545 | 7.76166 | 6.65676 | 2.15084 | 1.1049  | 2.15084 |
| Tob1          | NM_009427    | 0.001055 | 8.49106 | 9.30287 | 8.19902 | 2.14928 | 1.10385 | 2.14928 |
| Tgs1          | NM_054089    | 0.005075 | 5.57459 | 7.38194 | 6.27814 | 2.1492  | 1.1038  | 2.1492  |
| Gdpd1         | NM_025638    | 0.00335  | 6.24556 | 8.6913  | 7.58782 | 2.14872 | 1.10348 | 2.14872 |
| 6330407J23Rik | NM_026138    | 0.003195 | 6.32615 | 5.21257 | 4.10983 | 2.14762 | 1.10274 | 2.14762 |
| Pepd          | NM_008820    | 0.000542 | 10.092  | 8.29276 | 7.19017 | 2.1474  | 1.10259 | 2.1474  |
|               | ---          | 0.005115 | 5.56261 | 4.53733 | 3.43482 | 2.14728 | 1.10251 | 2.14728 |
| Clcn3         | NM_173874    | 5.09E-05 | 18.4426 | 7.09126 | 5.98886 | 2.14712 | 1.1024  | 2.14712 |
| Smc3          | NM_007790    | 3.39E-05 | 20.4369 | 10.1409 | 9.03898 | 2.14639 | 1.10191 | 2.14639 |
|               | ---          | 0.000825 | 9.05309 | 10.5673 | 9.46552 | 2.14612 | 1.10173 | 2.14612 |
| Gm906         | BC147515     | 0.001252 | 8.11765 | 4.88223 | 3.78052 | 2.14609 | 1.10171 | 2.14609 |
| Fubp1         | NM_057172    | 0.00412  | 5.90331 | 10.128  | 9.02722 | 2.14465 | 1.10074 | 2.14465 |
| D5Erttd579e   | NM_001081232 | 0.002055 | 7.12149 | 7.44321 | 6.34337 | 2.14331 | 1.09984 | 2.14331 |
| Tab1          | NM_025609    | 0.001034 | 8.53474 | 7.53235 | 6.43312 | 2.14241 | 1.09923 | 2.14241 |
| Zfp386        | NM_001004066 | 0.002734 | 6.59755 | 8.39677 | 7.29758 | 2.14234 | 1.09919 | 2.14234 |
| Ptpnj         | NM_008982    | 0.006447 | 5.21549 | 7.1643  | 6.06588 | 2.1412  | 1.09842 | 2.1412  |
| Tmem8         | NM_021793    | 8.92E-05 | 16.0026 | 6.26744 | 5.16904 | 2.14118 | 1.0984  | 2.14118 |
| Hdac7         | NM_019572    | 0.001834 | 7.34038 | 8.78011 | 7.68214 | 2.14053 | 1.09797 | 2.14053 |
| Rpf1          | NM_027371    | 0.004505 | 5.76055 | 9.18984 | 8.09212 | 2.14017 | 1.09773 | 2.14017 |
| Slc9a3r2      | NM_023055    | 0.000741 | 9.30974 | 7.44326 | 6.34554 | 2.14016 | 1.09772 | 2.14016 |
| Tnr           | NM_022312    | 0.001005 | 8.59862 | 5.53495 | 4.43825 | 2.13866 | 1.0967  | 2.13866 |
|               | ---          | 0.006544 | 5.19388 | 5.33101 | 4.2357  | 2.13659 | 1.09531 | 2.13659 |
| Usp6nl        | NM_181399    | 0.004215 | 5.8669  | 7.6645  | 6.56948 | 2.13616 | 1.09502 | 2.13616 |
| Gosr1         | NM_016810    | 0.001476 | 7.77459 | 10.0921 | 8.9977  | 2.13523 | 1.09439 | 2.13523 |
| Serpinb9b     | NM_011452    | 0.000292 | 11.8345 | 6.1424  | 5.04817 | 2.13498 | 1.09422 | 2.13498 |



|               |              |          |         |         |         |         |         |         |
|---------------|--------------|----------|---------|---------|---------|---------|---------|---------|
| Sfi1          | NM_030207    | 0.000537 | 10.1164 | 7.63076 | 6.53697 | 2.13434 | 1.09379 | 2.13434 |
| Slc6a9        | NM_008135    | 0.000734 | 9.33088 | 9.53816 | 8.44459 | 2.13403 | 1.09358 | 2.13403 |
| Chka          | NM_013490    | 0.005258 | 5.52021 | 7.30372 | 6.21059 | 2.13336 | 1.09313 | 2.13336 |
| Unc5b         | NM_029770    | 0.006253 | 5.26038 | 8.67498 | 7.58205 | 2.13307 | 1.09293 | 2.13307 |
| Ppp2r5d       | NM_009358    | 6.74E-05 | 17.1789 | 8.79155 | 7.69868 | 2.13298 | 1.09287 | 2.13298 |
| Fscn1         | NM_007984    | 0.001921 | 7.25088 | 10.2132 | 9.12193 | 2.13063 | 1.09128 | 2.13063 |
| Efhc2         | NM_028916    | 0.000523 | 10.1858 | 4.99258 | 3.9047  | 2.12561 | 1.08788 | 2.12561 |
|               | ---          | 0.002993 | 6.43899 | 8.46406 | 7.37723 | 2.12406 | 1.08682 | 2.12406 |
| Ints2         | NM_027421    | 0.000303 | 11.7201 | 8.52966 | 7.4438  | 2.12264 | 1.08586 | 2.12264 |
| Samd9l        | NM_010156    | 0.00237  | 6.85572 | 7.49512 | 6.40936 | 2.12249 | 1.08575 | 2.12249 |
| Tbl3          | NM_145396    | 0.00301  | 6.42894 | 8.44376 | 7.35839 | 2.12192 | 1.08537 | 2.12192 |
| Ppef1         | NM_011147    | 0.002649 | 6.65423 | 4.4388  | 3.35552 | 2.11885 | 1.08328 | 2.11885 |
| Uros          | NM_009479    | 0.000365 | 11.1725 | 7.65058 | 6.56765 | 2.11833 | 1.08293 | 2.11833 |
| Rhobtb2       | NM_153514    | 0.004346 | 5.8178  | 6.96879 | 5.88594 | 2.11821 | 1.08285 | 2.11821 |
|               | ---          | 0.002692 | 6.62526 | 5.79548 | 4.71306 | 2.11758 | 1.08242 | 2.11758 |
| Rab28         | NM_027295    | 0.000368 | 11.1505 | 9.02215 | 7.94076 | 2.11607 | 1.08139 | 2.11607 |
| Zfp827        | NM_178267    | 0.006991 | 5.09831 | 8.00549 | 6.92508 | 2.11464 | 1.08041 | 2.11464 |
|               | ---          | 0.00012  | 14.8421 | 5.65813 | 4.57789 | 2.11439 | 1.08024 | 2.11439 |
| 2610507B11Rik | NM_001002004 | 6.20E-05 | 17.5447 | 10.4345 | 9.35481 | 2.11359 | 1.0797  | 2.11359 |
| Synrg         | NM_001115009 | 0.000738 | 9.31774 | 7.38215 | 6.30445 | 2.11067 | 1.0777  | 2.11067 |
| Tmem189       | NM_145538    | 0.001532 | 7.69764 | 8.69144 | 7.61381 | 2.11057 | 1.07763 | 2.11057 |
| Chd7          | NM_001081417 | 0.001918 | 7.25354 | 5.24336 | 4.167   | 2.1087  | 1.07635 | 2.1087  |
| Prss23        | NM_029614    | 0.000933 | 8.76643 | 6.35732 | 5.28099 | 2.10867 | 1.07633 | 2.10867 |
|               | ---          | 0.000717 | 9.38895 | 7.39687 | 6.32073 | 2.10839 | 1.07614 | 2.10839 |
| 2310035C23Rik | NM_173187    | 4.58E-05 | 18.9339 | 8.48258 | 7.40782 | 2.10638 | 1.07476 | 2.10638 |
|               | ---          | 0.001189 | 8.22901 | 11.37   | 10.2954 | 2.10615 | 1.07461 | 2.10615 |
| 2010011120Rik | NM_025912    | 0.005629 | 5.41691 | 7.45535 | 6.38126 | 2.1054  | 1.07409 | 2.1054  |
| Rnu3b1        | NR_004415    | 0.000941 | 8.7486  | 9.50206 | 8.42805 | 2.10528 | 1.07401 | 2.10528 |
| Rnu3b1        | NR_004415    | 0.000941 | 8.7486  | 9.50206 | 8.42805 | 2.10528 | 1.07401 | 2.10528 |
| Rnu3b1        | NR_004415    | 0.000941 | 8.7486  | 9.50206 | 8.42805 | 2.10528 | 1.07401 | 2.10528 |
| Rnu3b1        | NR_004415    | 0.000941 | 8.7486  | 9.50206 | 8.42805 | 2.10528 | 1.07401 | 2.10528 |

|               |                        |          |         |         |         |         |         |         |
|---------------|------------------------|----------|---------|---------|---------|---------|---------|---------|
| Thns1         | NM_177588              | 0.000585 | 9.89774 | 6.59884 | 5.52601 | 2.10355 | 1.07283 | 2.10355 |
| Pik3c2a       | NM_011083              | 0.001594 | 7.61746 | 8.87    | 7.79894 | 2.10096 | 1.07105 | 2.10096 |
| Chd7          | NM_001081417           | 0.000355 | 11.2576 | 7.65359 | 6.58255 | 2.10095 | 1.07104 | 2.10095 |
| Tm7sf2        | NM_028454              | 9.97E-05 | 15.5541 | 7.43523 | 6.36474 | 2.10014 | 1.07049 | 2.10014 |
| Rnf157        | NM_027258              | 0.002494 | 6.76273 | 6.47776 | 5.40776 | 2.09943 | 1.06999 | 2.09943 |
| Hist1h2bg     | NM_178196              | 0.002094 | 7.08603 | 6.18483 | 5.11517 | 2.09894 | 1.06966 | 2.09894 |
| Nefl          | NM_010910              | 0.000444 | 10.6253 | 5.52438 | 4.45503 | 2.09849 | 1.06935 | 2.09849 |
| Apobec3       | NM_001160415           | 0.006111 | 5.29413 | 8.07717 | 7.008   | 2.09822 | 1.06917 | 2.09822 |
| Nck2          | NM_010879              | 0.000423 | 10.759  | 7.78596 | 6.717   | 2.09793 | 1.06896 | 2.09793 |
| Wnt9a         | NM_139298              | 0.003151 | 6.35005 | 7.61238 | 6.54542 | 2.09502 | 1.06696 | 2.09502 |
| Tead4         | NM_011567              | 0.001213 | 8.18574 | 6.52293 | 5.45632 | 2.09451 | 1.06661 | 2.09451 |
| A430105119Rik | NM_001001982           | 0.001434 | 7.83385 | 7.84158 | 6.77536 | 2.09394 | 1.06622 | 2.09394 |
| Vezf1         | NM_016686              | 0.000575 | 9.93995 | 9.07274 | 8.00708 | 2.09314 | 1.06567 | 2.09314 |
| Tbc1d22a      | NM_145476              | 0.002181 | 7.00963 | 8.36504 | 7.30015 | 2.09202 | 1.06489 | 2.09202 |
| Chd7          | NM_001081417           | 3.53E-05 | 20.218  | 6.33663 | 5.27188 | 2.0918  | 1.06474 | 2.0918  |
| Mtmt14        | NM_026849              | 0.004721 | 5.6868  | 8.62153 | 7.55805 | 2.08997 | 1.06348 | 2.08997 |
| Msi2          | NM_054043              | 0.000128 | 14.604  | 9.43058 | 8.36829 | 2.08824 | 1.06229 | 2.08824 |
| Pard6b        | NM_021409              | 6.21E-05 | 17.5384 | 6.30057 | 5.23843 | 2.08803 | 1.06214 | 2.08803 |
| 0610010B08Rik | ENSMUST0000010899<br>1 | 0.005169 | 5.5463  | 9.95445 | 8.89269 | 2.08747 | 1.06176 | 2.08747 |
| Gm14430       | NM_001100415           | 0.005169 | 5.5463  | 9.95445 | 8.89269 | 2.08747 | 1.06176 | 2.08747 |
| 1E+08         | NM_001099327           | 0.005169 | 5.5463  | 9.95445 | 8.89269 | 2.08747 | 1.06176 | 2.08747 |
| Gm14430       | NM_001100415           | 0.005169 | 5.5463  | 9.95445 | 8.89269 | 2.08747 | 1.06176 | 2.08747 |
| 0610010B08Rik | ENSMUST0000010899<br>1 | 0.005169 | 5.5463  | 9.95445 | 8.89269 | 2.08747 | 1.06176 | 2.08747 |
| 0610010B08Rik | ENSMUST0000010899<br>1 | 0.005169 | 5.5463  | 9.95445 | 8.89269 | 2.08747 | 1.06176 | 2.08747 |
| 0610010B08Rik | ENSMUST0000010899<br>1 | 0.005169 | 5.5463  | 9.95445 | 8.89269 | 2.08747 | 1.06176 | 2.08747 |
| Chac1         | NM_026929              | 0.007056 | 5.08507 | 7.89874 | 6.83942 | 2.08395 | 1.05932 | 2.08395 |
|               | ---                    | 0.000302 | 11.7331 | 4.0158  | 2.9567  | 2.08363 | 1.0591  | 2.08363 |
| Ciapi1        | NM_134141              | 0.000227 | 12.617  | 8.49724 | 7.43979 | 2.08125 | 1.05745 | 2.08125 |
| Psme2         | NM_011190              | 0.001558 | 7.66403 | 7.70162 | 6.64647 | 2.07793 | 1.05515 | 2.07793 |

|               |              |          |         |         |         |         |         |         |
|---------------|--------------|----------|---------|---------|---------|---------|---------|---------|
| Vps53         | NM_026664    | 0.000544 | 10.0852 | 8.48352 | 7.42877 | 2.07736 | 1.05475 | 2.07736 |
| Pldn          | NM_019788    | 0.002449 | 6.79532 | 7.99638 | 6.94268 | 2.07584 | 1.0537  | 2.07584 |
| Epn2          | NM_010148    | 0.00049  | 10.3625 | 8.18589 | 7.13385 | 2.07346 | 1.05204 | 2.07346 |
| Ttll1         | NM_178869    | 0.000648 | 9.63855 | 8.70371 | 7.6518  | 2.07328 | 1.05191 | 2.07328 |
|               | ---          | 0.000601 | 9.82745 | 6.60937 | 5.55789 | 2.07266 | 1.05148 | 2.07266 |
| Zcwpw1        | NM_001005426 | 0.002594 | 6.69149 | 6.53074 | 5.47952 | 2.07228 | 1.05122 | 2.07228 |
| Lrrc16a       | NM_026825    | 0.001764 | 7.41636 | 8.17578 | 7.12488 | 2.07182 | 1.0509  | 2.07182 |
| Efna3         | NM_010108    | 0.004901 | 5.62846 | 5.39442 | 4.3437  | 2.07156 | 1.05072 | 2.07156 |
|               | ---          | 0.00124  | 8.13879 | 10.9281 | 9.87768 | 2.07118 | 1.05045 | 2.07118 |
| Zdhhc13       | NM_028031    | 7.60E-05 | 16.6655 | 8.78254 | 7.73277 | 2.07019 | 1.04977 | 2.07019 |
| Pak1          | NM_011035    | 0.001795 | 7.38238 | 7.95723 | 6.90783 | 2.06966 | 1.0494  | 2.06966 |
| Abat          | NM_172961    | 0.005952 | 5.33339 | 8.02283 | 6.97355 | 2.06949 | 1.04927 | 2.06949 |
| Zfp238        | NM_001012330 | 0.001057 | 8.48751 | 7.23671 | 6.18765 | 2.06919 | 1.04906 | 2.06919 |
| C330019L16Rik | NM_001034857 | 0.000761 | 9.24353 | 5.46035 | 4.4115  | 2.06888 | 1.04885 | 2.06888 |
| Got1          | NM_010324    | 0.004689 | 5.69768 | 10.2946 | 9.24605 | 2.06848 | 1.04857 | 2.06848 |
| Sgms1         | NM_001168525 | 0.000287 | 11.8876 | 8.93402 | 7.88598 | 2.06772 | 1.04804 | 2.06772 |
|               | ---          | 0.001224 | 8.1672  | 9.09426 | 8.04661 | 2.06716 | 1.04765 | 2.06716 |
|               | ---          | 0.001725 | 7.46093 | 9.72593 | 8.67874 | 2.0665  | 1.04719 | 2.0665  |
| Ptprj         | NM_008982    | 0.006456 | 5.21346 | 7.44069 | 6.39465 | 2.06485 | 1.04604 | 2.06485 |
| Ppp6r3        | NM_028999    | 2.85E-05 | 21.3491 | 10.0963 | 9.05039 | 2.06462 | 1.04588 | 2.06462 |
| Fam49b        | NM_144846    | 0.001767 | 7.41277 | 8.13037 | 7.08495 | 2.06396 | 1.04542 | 2.06396 |
| Tbrg4         | NM_134011    | 0.001015 | 8.57689 | 8.09641 | 7.05107 | 2.06385 | 1.04534 | 2.06385 |
| Rb1           | NM_009029    | 0.006049 | 5.30927 | 7.37418 | 6.32899 | 2.06365 | 1.0452  | 2.06365 |
| 5031425E22Rik | BC050254     | 0.001914 | 7.25731 | 6.92861 | 5.8848  | 2.06168 | 1.04382 | 2.06168 |
| Eif2b2        | NM_145445    | 0.000196 | 13.103  | 8.42025 | 7.3768  | 2.06114 | 1.04344 | 2.06114 |
| Ormdl1        | NM_145517    | 0.000731 | 9.34133 | 6.61943 | 5.57623 | 2.0608  | 1.0432  | 2.0608  |
| Pstpip2       | NM_013831    | 0.001137 | 8.32681 | 4.92796 | 3.88506 | 2.06036 | 1.0429  | 2.06036 |
| Ptrf          | NM_008986    | 4.77E-05 | 18.7445 | 9.90544 | 8.86379 | 2.05859 | 1.04165 | 2.05859 |
| Dennd2a       | NM_172477    | 0.000158 | 13.8373 | 8.35407 | 7.31266 | 2.05823 | 1.04141 | 2.05823 |
| Fign          | NM_021716    | 0.003866 | 6.0071  | 4.84187 | 3.80046 | 2.05823 | 1.0414  | 2.05823 |
| Prr5l         | NM_001083810 | 0.003468 | 6.18747 | 4.63249 | 3.59111 | 2.0582  | 1.04139 | 2.0582  |

|               |              |              |          |         |         |         |         |         |         |
|---------------|--------------|--------------|----------|---------|---------|---------|---------|---------|---------|
| Ces4a         | NM_146213    | 0.001182     | 8.24105  | 5.67266 | 4.63153 | 2.05784 | 1.04113 | 2.05784 |         |
| Patz1         | NM_019574    | 0.000663     | 9.58005  | 7.64666 | 6.60641 | 2.05658 | 1.04025 | 2.05658 |         |
|               | ---          | 0.003876     | 6.00271  | 7.40343 | 6.3636  | 2.05599 | 1.03983 | 2.05599 |         |
| Abca2         | NM_007379    | 0.001129     | 8.34092  | 7.6526  | 6.61342 | 2.05506 | 1.03918 | 2.05506 |         |
| Casp3         | NM_009810    | 0.000257     | 12.2238  | 8.75419 | 7.71559 | 2.05423 | 1.03859 | 2.05423 |         |
| Cenpt         | NM_177150    | 0.000692     | 9.47592  | 7.54686 | 6.50973 | 2.05214 | 1.03713 | 2.05214 |         |
| Rhebl1        | NM_026967    | 0.002422     | 6.81585  | 6.01662 | 4.98114 | 2.04979 | 1.03548 | 2.04979 |         |
| Trit1         | NM_025873    | 0.003122     | 6.36617  | 7.287   | 6.25167 | 2.04958 | 1.03533 | 2.04958 |         |
| Eed           | NM_021876    | 0.001986     | 7.18654  | 8.47843 | 7.44561 | 2.04602 | 1.03282 | 2.04602 |         |
| 2310001A20Rik | NM_027977    | 3.31E-06     | 36.6575  | 8.747   | 7.71426 | 2.04591 | 1.03274 | 2.04591 |         |
| Ddx23         | NM_001080981 | 3.92E-05     | 19.7001  | 9.17071 | 8.14092 | 2.04173 | 1.02979 | 2.04173 |         |
|               | ---          | 0.006986     | 5.09931  | 8.84004 | 7.81096 | 2.04072 | 1.02908 | 2.04072 |         |
| Al606181      | BC116839     | 4.39E-05     | 19.1362  | 6.03527 | 5.0063  | 2.04056 | 1.02897 | 2.04056 |         |
| Schip1        | NM_001113421 | 2.42E-05     | 22.2293  | 8.28968 | 7.26073 | 2.04055 | 1.02896 | 2.04055 |         |
| Mtap          | NM_024433    | 0.004576     | 5.73586  | 8.54612 | 7.51823 | 2.03904 | 1.02789 | 2.03904 |         |
| Nol11         | NM_133702    | 0.00258      | 6.70173  | 8.79518 | 7.76802 | 2.038   | 1.02716 | 2.038   |         |
| Kcnh2         | NM_013569    | 0.002899     | 6.49436  | 6.1003  | 5.07471 | 2.03578 | 1.02558 | 2.03578 |         |
|               | ---          | 0.001966     | 7.20571  | 8.86202 | 7.83695 | 2.03506 | 1.02507 | 2.03506 |         |
| Med1          | NM_013634    | 0.000515     | 10.2278  | 8.83026 | 7.80572 | 2.03431 | 1.02454 | 2.03431 |         |
|               | ---          | 0.001517     | 7.71778  | 9.98126 | 8.95761 | 2.03306 | 1.02365 | 2.03306 |         |
|               | 9-Mar        | NM_001033262 | 0.004535 | 5.75006 | 6.42201 | 5.39968 | 2.03119 | 1.02233 | 2.03119 |
| Nudcd1        | NM_026149    | 0.000544     | 10.0822  | 9.13545 | 8.11445 | 2.02932 | 1.021   | 2.02932 |         |
|               | ---          | 0.002764     | 6.57881  | 7.27063 | 6.25029 | 2.02839 | 1.02034 | 2.02839 |         |
| Frk           | NM_001159544 | 0.002536     | 6.7322   | 7.77865 | 6.75873 | 2.02781 | 1.01992 | 2.02781 |         |
| Sart3         | NM_016926    | 0.000185     | 13.2947  | 8.01916 | 6.99955 | 2.02736 | 1.0196  | 2.02736 |         |
| Znrf3         | NM_001080924 | 0.003989     | 5.95583  | 7.1559  | 6.13678 | 2.02668 | 1.01912 | 2.02668 |         |
| S100a10       | NM_009112    | 0.001291     | 8.05232  | 12.2044 | 11.1866 | 2.02475 | 1.01775 | 2.02475 |         |
| Arhgef10      | NM_172751    | 0.00103      | 8.54326  | 7.51194 | 6.49699 | 2.02084 | 1.01496 | 2.02084 |         |
| Hpcal1        | NM_016677    | 0.006702     | 5.15913  | 8.70101 | 7.6861  | 2.02078 | 1.01491 | 2.02078 |         |
| Smap2         | NM_133716    | 0.000835     | 9.02487  | 7.89771 | 6.88296 | 2.02055 | 1.01475 | 2.02055 |         |
| Elp4          | NM_023876    | 0.002549     | 6.72297  | 8.04672 | 7.03256 | 2.01973 | 1.01416 | 2.01973 |         |

|         |              |          |         |         |         |         |         |         |
|---------|--------------|----------|---------|---------|---------|---------|---------|---------|
| Pdzd8   | NM_001033222 | 0.002612 | 6.6792  | 9.12087 | 8.10685 | 2.01953 | 1.01402 | 2.01953 |
| Strn    | NM_011500    | 0.001856 | 7.31736 | 8.276   | 7.26214 | 2.01932 | 1.01387 | 2.01932 |
| Slc48a1 | NM_026353    | 0.004564 | 5.74001 | 10.3985 | 9.38475 | 2.01921 | 1.01379 | 2.01921 |
|         | ---          | 0.000755 | 9.26553 | 4.98287 | 3.96909 | 2.0192  | 1.01378 | 2.0192  |
| Med24   | NM_011869    | 0.001695 | 7.49533 | 9.04701 | 8.03329 | 2.0191  | 1.01371 | 2.0191  |
|         | ---          | 0.002197 | 6.99573 | 8.53078 | 7.51822 | 2.01748 | 1.01255 | 2.01748 |
| Lmbrd2  | NM_177178    | 0.00032  | 11.5564 | 8.9109  | 7.89863 | 2.01708 | 1.01227 | 2.01708 |
| Sec14l2 | NM_144520    | 0.00152  | 7.71437 | 6.26951 | 5.25753 | 2.01667 | 1.01198 | 2.01667 |
|         | ---          | 8.85E-05 | 16.031  | 10.122  | 9.1107  | 2.01572 | 1.01129 | 2.01572 |
| S100a3  | NM_011310    | 0.000191 | 13.193  | 5.74131 | 4.73012 | 2.01558 | 1.01119 | 2.01558 |
| Atp6v0b | NM_033617    | 0.001028 | 8.5491  | 10.8454 | 9.83448 | 2.01522 | 1.01094 | 2.01522 |
| Zfp53   | NM_013843    | 0.006096 | 5.29786 | 7.28102 | 6.27092 | 2.01406 | 1.01011 | 2.01406 |
| Ipp     | NM_008389    | 0.000216 | 12.7764 | 6.30758 | 5.29845 | 2.01269 | 1.00912 | 2.01269 |
| Il2rb   | NM_008368    | 0.005381 | 5.48491 | 5.10308 | 4.09417 | 2.01239 | 1.00891 | 2.01239 |
| Atxn10  | NM_016843    | 0.000218 | 12.7513 | 11.0149 | 10.006  | 2.01236 | 1.00889 | 2.01236 |
| Crlf1   | NM_018827    | 0.005178 | 5.54371 | 9.6537  | 8.64487 | 2.01228 | 1.00883 | 2.01228 |
| Sf3b2   | NM_030109    | 0.00028  | 11.9638 | 9.34525 | 8.33668 | 2.0119  | 1.00856 | 2.0119  |
| Xpo4    | NM_020506    | 0.001185 | 8.23645 | 8.32093 | 7.3126  | 2.01159 | 1.00834 | 2.01159 |
| Tcfcp2  | NM_033476    | 0.001432 | 7.83582 | 8.28185 | 7.27358 | 2.01149 | 1.00827 | 2.01149 |
| Ccdc28a | NM_144820    | 0.00656  | 5.19034 | 6.54124 | 5.53362 | 2.0106  | 1.00762 | 2.0106  |
| Ccdc136 | NM_145574    | 0.000351 | 11.2891 | 7.62463 | 6.61736 | 2.0101  | 1.00727 | 2.0101  |
| Yaf2    | NR_028315    | 0.001912 | 7.2593  | 8.36473 | 7.3575  | 2.01006 | 1.00724 | 2.01006 |
| Cd151   | NM_009842    | 6.91E-05 | 17.0675 | 9.5792  | 8.57309 | 2.00849 | 1.00611 | 2.00849 |
| Zfp788  | NM_023363    | 0.000743 | 9.30321 | 7.37901 | 6.37383 | 2.0072  | 1.00518 | 2.0072  |
| Zfp788  | NM_023363    | 0.000743 | 9.30321 | 7.37901 | 6.37383 | 2.0072  | 1.00518 | 2.0072  |
| Ppfibp1 | NM_001170433 | 0.000932 | 8.77108 | 11.003  | 9.99867 | 2.00597 | 1.0043  | 2.00597 |
| Usp20   | NM_028846    | 0.004454 | 5.77858 | 7.06912 | 6.06485 | 2.00593 | 1.00427 | 2.00593 |
| Polr3c  | NM_028925    | 0.001195 | 8.21733 | 8.95455 | 7.95136 | 2.00442 | 1.00319 | 2.00442 |
| Sgms2   | NM_028943    | 0.003219 | 6.3135  | 6.90453 | 5.9018  | 2.00378 | 1.00273 | 2.00378 |
| Mrpl47  | NM_029017    | 0.007028 | 5.09072 | 6.43818 | 5.43571 | 2.00343 | 1.00247 | 2.00343 |
| Lgals9  | NM_010708    | 0.004155 | 5.88985 | 9.50825 | 8.50703 | 2.00169 | 1.00122 | 2.00169 |

|          |              |          |         |         |         |         |          |         |
|----------|--------------|----------|---------|---------|---------|---------|----------|---------|
| Mlst8    | NM_019988    | 5.06E-05 | 18.4683 | 8.19636 | 7.19536 | 2.00139 | 1.001    | 2.00139 |
| Phf10    | NM_024250    | 7.78E-05 | 16.5639 | 8.62532 | 7.62461 | 2.00098 | 1.00071  | 2.00098 |
| Ndufs5   | NM_001030274 | 0.000584 | 9.90059 | 7.49777 | 6.4972  | 2.00078 | 1.00056  | 2.00078 |
| Ada      | NM_007398    | 0.001149 | 8.30375 | 6.7311  | 5.73054 | 2.00077 | 1.00056  | 2.00077 |
| Slc25a39 | NM_026542    | 0.001132 | 8.33643 | 10.4512 | 9.4516  | 1.99945 | 0.999601 | 1.99945 |
| Rfwd3    | NM_146218    | 0.004999 | 5.59792 | 8.64312 | 7.64368 | 1.99922 | 0.999439 | 1.99922 |
| Abca7    | NM_013850    | 0.000265 | 12.1361 | 7.30161 | 6.30226 | 1.99909 | 0.999344 | 1.99909 |
| Cdh2     | NM_007664    | 0.006867 | 5.12393 | 8.61873 | 7.62141 | 1.9963  | 0.997327 | 1.9963  |
| Plekho1  | NM_023320    | 0.00158  | 7.63563 | 8.31792 | 7.3213  | 1.99533 | 0.996624 | 1.99533 |
| Acadm    | NM_007382    | 0.000877 | 8.90941 | 10.3059 | 9.31126 | 1.99256 | 0.994625 | 1.99256 |
| Dhx32    | NM_133941    | 0.000726 | 9.35845 | 7.88799 | 6.89343 | 1.99249 | 0.994569 | 1.99249 |
| Rarg     | NM_011244    | 0.001353 | 7.95488 | 8.29457 | 7.30078 | 1.99141 | 0.993789 | 1.99141 |
|          | ---          | 0.006031 | 5.31378 | 4.80693 | 3.81462 | 1.98936 | 0.992307 | 1.98936 |
| Ikbkg    | NM_001136067 | 0.001482 | 7.7661  | 8.18803 | 7.19581 | 1.98924 | 0.992215 | 1.98924 |
| Hif1an   | NM_176958    | 0.003518 | 6.16341 | 7.69638 | 6.70463 | 1.98859 | 0.991747 | 1.98859 |
| Lpar6    | NM_175116    | 0.005083 | 5.57231 | 8.30674 | 7.31538 | 1.98806 | 0.991362 | 1.98806 |
| Chd7     | NM_001081417 | 0.000803 | 9.1159  | 5.87479 | 4.88387 | 1.98745 | 0.990919 | 1.98745 |
| Smg5     | NM_178246    | 0.001028 | 8.54767 | 7.91375 | 6.92366 | 1.98631 | 0.990089 | 1.98631 |
| Zcchc4   | NM_030185    | 0.003794 | 6.03773 | 7.51845 | 6.52922 | 1.98512 | 0.989223 | 1.98512 |
| Tmem184a | NM_001161548 | 0.000544 | 10.0832 | 5.44389 | 4.45472 | 1.98505 | 0.989179 | 1.98505 |
| Alg6     | NM_001081264 | 0.003621 | 6.11518 | 6.72526 | 5.73621 | 1.98488 | 0.98905  | 1.98488 |
| Crlf3    | NM_018776    | 1.73E-06 | 43.1191 | 8.74471 | 7.75602 | 1.98438 | 0.988687 | 1.98438 |
| Zfp706   | NM_026521    | 0.000838 | 9.01712 | 10.2457 | 9.2579  | 1.9832  | 0.987832 | 1.9832  |
| Slc3a1   | NM_009205    | 0.005026 | 5.58966 | 5.57684 | 4.59023 | 1.98153 | 0.986614 | 1.98153 |
| Copg2    | NM_017478    | 0.005589 | 5.42761 | 9.78899 | 8.80351 | 1.97998 | 0.985485 | 1.97998 |
| Tubgcp6  | NM_001163319 | 5.91E-05 | 17.757  | 6.95912 | 5.97386 | 1.97967 | 0.985259 | 1.97967 |
| Alox5ap  | NM_009663    | 0.002628 | 6.66866 | 5.896   | 4.91107 | 1.97922 | 0.984934 | 1.97922 |
| Atp6v1c1 | NM_025494    | 0.001478 | 7.77139 | 10.3074 | 9.32296 | 1.97849 | 0.984399 | 1.97849 |
| BC023105 | BC023105     | 0.003841 | 6.01766 | 3.67179 | 2.68797 | 1.9777  | 0.983825 | 1.9777  |
| Pigf     | NM_008838    | 0.004802 | 5.66019 | 8.19899 | 7.2155  | 1.97723 | 0.983484 | 1.97723 |
| Lrrc14   | NM_145471    | 2.65E-05 | 21.735  | 8.2016  | 7.21816 | 1.97716 | 0.983431 | 1.97716 |

|          |              |          |         |         |         |         |          |         |
|----------|--------------|----------|---------|---------|---------|---------|----------|---------|
| Cpd      | NM_007754    | 0.000236 | 12.5001 | 9.18875 | 8.20535 | 1.97712 | 0.983402 | 1.97712 |
| Cpox     | NM_007757    | 0.00158  | 7.63627 | 7.88519 | 6.90188 | 1.977   | 0.983313 | 1.977   |
| Tcf7l2   | NM_001142918 | 0.000615 | 9.7697  | 8.19296 | 7.21123 | 1.97484 | 0.981738 | 1.97484 |
| Ap1g1    | NM_009677    | 0.000128 | 14.5936 | 9.62983 | 8.64876 | 1.97393 | 0.981069 | 1.97393 |
|          | ---          | 0.00411  | 5.90746 | 8.79647 | 7.81543 | 1.97388 | 0.981038 | 1.97388 |
| Apbb1    | NM_009685    | 0.000409 | 10.8529 | 7.40845 | 6.42753 | 1.97373 | 0.980924 | 1.97373 |
| Lss      | NM_146006    | 0.00347  | 6.18643 | 7.34691 | 6.36632 | 1.97326 | 0.980584 | 1.97326 |
| Psme1    | NM_011189    | 0.000319 | 11.5658 | 10.2895 | 9.30928 | 1.97271 | 0.980181 | 1.97271 |
| Irs2     | NM_001081212 | 0.003566 | 6.14042 | 7.1492  | 6.17008 | 1.97126 | 0.979121 | 1.97126 |
| Slc25a10 | NM_013770    | 0.000347 | 11.3235 | 7.91845 | 6.93945 | 1.9711  | 0.978998 | 1.9711  |
| Cdh22    | NM_174988    | 0.000834 | 9.02655 | 6.14037 | 5.1622  | 1.96995 | 0.978162 | 1.96995 |
| Lancl2   | NM_133737    | 0.00606  | 5.30657 | 8.53343 | 7.55538 | 1.9698  | 0.978047 | 1.9698  |
| Pmepa1   | NM_022995    | 0.003814 | 6.0293  | 10.2712 | 9.29341 | 1.96948 | 0.977812 | 1.96948 |
| Tusc5    | NM_177709    | 0.004411 | 5.79411 | 5.99601 | 5.02033 | 1.96657 | 0.975684 | 1.96657 |
| Rfwd3    | NM_146218    | 0.005136 | 5.55612 | 8.61755 | 7.64287 | 1.96521 | 0.974682 | 1.96521 |
| Bcas3    | NM_138681    | 0.000219 | 12.7387 | 7.55571 | 6.58115 | 1.96504 | 0.97456  | 1.96504 |
| Asxl1    | NM_001039939 | 0.00508  | 5.57299 | 8.78485 | 7.81075 | 1.96441 | 0.974096 | 1.96441 |
| Coq5     | NM_026504    | 0.003233 | 6.30594 | 7.67382 | 6.70052 | 1.96332 | 0.973298 | 1.96332 |
| Fam82a1  | NM_201361    | 0.002036 | 7.13897 | 7.25459 | 6.2814  | 1.96318 | 0.97319  | 1.96318 |
| Osgpl1   | NM_028091    | 0.000408 | 10.8627 | 6.69105 | 5.71912 | 1.96146 | 0.971929 | 1.96146 |
| Wbp2     | NM_016852    | 0.000675 | 9.53563 | 8.82293 | 7.85203 | 1.96006 | 0.970901 | 1.96006 |
| Hist1h4j | NM_178210    | 0.001851 | 7.32219 | 5.791   | 4.82026 | 1.95985 | 0.970743 | 1.95985 |
| Zmym6    | NM_177462    | 0.001154 | 8.29414 | 8.55804 | 7.58783 | 1.95913 | 0.970212 | 1.95913 |
| Phlpp1   | NM_133821    | 0.006583 | 5.18516 | 6.74772 | 5.77868 | 1.95754 | 0.969044 | 1.95754 |
| Git1     | NM_001004144 | 6.87E-05 | 17.0926 | 8.51857 | 7.54957 | 1.95749 | 0.969004 | 1.95749 |
| Phf14    | NM_029404    | 0.006049 | 5.30944 | 7.995   | 7.02601 | 1.95747 | 0.968992 | 1.95747 |
| Terf1    | NM_009352    | 0.000621 | 9.74632 | 7.81256 | 6.84367 | 1.95732 | 0.968883 | 1.95732 |
| Ptar1    | NM_028208    | 0.003192 | 6.32812 | 8.59575 | 7.62689 | 1.95729 | 0.968861 | 1.95729 |
| Mars2    | NM_175439    | 0.00098  | 8.65671 | 6.98923 | 6.02054 | 1.95707 | 0.968693 | 1.95707 |
| Morn4    | NM_198108    | 0.00146  | 7.79716 | 8.08179 | 7.11321 | 1.95692 | 0.968581 | 1.95692 |
| Dcun1d4  | NM_001190734 | 0.003884 | 5.99948 | 8.21764 | 7.25037 | 1.95514 | 0.967269 | 1.95514 |

|               |              |          |         |         |         |         |          |         |
|---------------|--------------|----------|---------|---------|---------|---------|----------|---------|
| Pcyt1b        | NM_211138    | 0.001015 | 8.57726 | 6.5121  | 5.54529 | 1.95452 | 0.966812 | 1.95452 |
| Krt14         | NM_016958    | 0.002542 | 6.72832 | 5.33644 | 4.37077 | 1.95296 | 0.965663 | 1.95296 |
|               | ---          | 0.003694 | 6.08186 | 9.68493 | 8.71934 | 1.95286 | 0.96559  | 1.95286 |
| Spata6        | NM_026470    | 0.002422 | 6.81565 | 7.04791 | 6.0827  | 1.95234 | 0.965205 | 1.95234 |
| Hrc           | NM_010473    | 0.00151  | 7.72754 | 5.89264 | 4.92821 | 1.95129 | 0.964427 | 1.95129 |
| Trip12        | NM_133975    | 0.000151 | 14.0047 | 11.1011 | 10.1376 | 1.95004 | 0.963502 | 1.95004 |
| Pot1a         | NM_133931    | 0.004719 | 5.68758 | 8.42524 | 7.46251 | 1.949   | 0.962735 | 1.949   |
| Rpusd1        | NM_028009    | 0.000957 | 8.71075 | 7.56867 | 6.60645 | 1.9483  | 0.962218 | 1.9483  |
| Trpm6         | NM_153417    | 0.00027  | 12.0752 | 5.36832 | 4.40639 | 1.94793 | 0.961938 | 1.94793 |
| Nppb          | NM_008726    | 0.006889 | 5.11949 | 5.67778 | 4.71592 | 1.94782 | 0.961859 | 1.94782 |
| Prss42        | NM_153099    | 0.002937 | 6.47167 | 5.01033 | 4.0485  | 1.94779 | 0.961837 | 1.94779 |
| Cpsf1         | NM_001164173 | 0.000556 | 10.0264 | 8.13827 | 7.17725 | 1.94668 | 0.961019 | 1.94668 |
| Tubb2b        | NM_023716    | 0.001157 | 8.28881 | 7.58656 | 6.62596 | 1.94612 | 0.960598 | 1.94612 |
| 2700046G09Rik | NR_033198    | 0.000105 | 15.3498 | 6.33048 | 5.371   | 1.94461 | 0.959482 | 1.94461 |
| Aco2          | NM_080633    | 0.000115 | 15.0096 | 11.2261 | 10.268  | 1.94275 | 0.9581   | 1.94275 |
| Zc3hc1        | NM_172735    | 0.002579 | 6.70182 | 8.13728 | 7.18309 | 1.93749 | 0.954188 | 1.93749 |
| Smyd4         | NM_001102611 | 0.000393 | 10.9652 | 6.92692 | 5.97276 | 1.93745 | 0.95416  | 1.93745 |
| Oip5          | NM_001042653 | 0.001599 | 7.61217 | 4.95537 | 4.0013  | 1.93733 | 0.954067 | 1.93733 |
| Krit1         | NR_033173    | 0.000311 | 11.6441 | 8.92669 | 7.97324 | 1.9365  | 0.953449 | 1.9365  |
| BC052040      | NM_001145898 | 0.000422 | 10.7641 | 7.18063 | 6.22752 | 1.93603 | 0.953105 | 1.93603 |
| Zfp661        | NM_028141    | 0.000174 | 13.497  | 7.04661 | 6.09352 | 1.93601 | 0.953089 | 1.93601 |
| Ssfa2         | NM_080558    | 0.00483  | 5.65133 | 7.50222 | 6.54954 | 1.93546 | 0.952679 | 1.93546 |
|               | ---          | 0.003306 | 6.26784 | 6.23247 | 5.28    | 1.93518 | 0.952468 | 1.93518 |
| Hrsp12        | NM_008287    | 0.000386 | 11.0128 | 9.40337 | 8.45123 | 1.93475 | 0.952146 | 1.93475 |
|               | ---          | 0.001371 | 7.92686 | 8.30395 | 7.35226 | 1.93414 | 0.951693 | 1.93414 |
| Inpp5j        | NM_172439    | 0.002296 | 6.91431 | 5.92867 | 4.97854 | 1.93205 | 0.950134 | 1.93205 |
|               | ---          | 0.000468 | 10.484  | 11.302  | 10.3523 | 1.93148 | 0.949708 | 1.93148 |
| Scd4          | NM_183216    | 0.006686 | 5.16252 | 5.02946 | 4.07976 | 1.93147 | 0.9497   | 1.93147 |
| 6-Mar         | NM_172606    | 0.000665 | 9.57355 | 10.3415 | 9.39182 | 1.93145 | 0.949687 | 1.93145 |
| Arhgef10l     | NM_172415    | 0.006542 | 5.19427 | 7.42267 | 6.47353 | 1.93072 | 0.949137 | 1.93072 |
| Foxo1         | NM_019739    | 0.002131 | 7.05285 | 7.73882 | 6.78992 | 1.9304  | 0.948899 | 1.9304  |



|               |              |          |         |         |         |         |          |         |
|---------------|--------------|----------|---------|---------|---------|---------|----------|---------|
| Rqcd1         | NM_021383    | 0.003921 | 5.984   | 8.54903 | 7.60018 | 1.93034 | 0.948853 | 1.93034 |
| Mcrs1         | NM_016766    | 3.04E-05 | 20.9899 | 8.33585 | 7.38828 | 1.92862 | 0.947567 | 1.92862 |
| Agfg1         | NM_010472    | 2.53E-05 | 21.9823 | 10.9671 | 10.0208 | 1.92702 | 0.946369 | 1.92702 |
| Cnnm2         | NM_033569    | 0.006941 | 5.10851 | 8.08083 | 7.13489 | 1.92645 | 0.945947 | 1.92645 |
| Cd2ap         | NM_009847    | 0.005999 | 5.3216  | 9.32632 | 8.38464 | 1.92077 | 0.941682 | 1.92077 |
| Adam8         | NM_007403    | 0.000561 | 10.0042 | 6.48785 | 5.54644 | 1.9204  | 0.941407 | 1.9204  |
| Anubl1        | NM_001081317 | 0.001063 | 8.47357 | 5.59635 | 4.65507 | 1.92022 | 0.941273 | 1.92022 |
| Smc5          | NM_153808    | 0.000435 | 10.6848 | 9.98299 | 9.04296 | 1.91857 | 0.940031 | 1.91857 |
| Tapbpl        | NM_145391    | 0.001714 | 7.47283 | 7.53775 | 6.59887 | 1.91704 | 0.938883 | 1.91704 |
| Pigy          | NM_025574    | 0.000395 | 10.9494 | 7.17215 | 6.23457 | 1.91531 | 0.937578 | 1.91531 |
| Zfp235        | NM_019941    | 0.005827 | 5.36482 | 6.62375 | 5.68632 | 1.91512 | 0.937434 | 1.91512 |
| Tns3          | NM_001083587 | 0.001364 | 7.938   | 8.9794  | 8.04213 | 1.91491 | 0.937275 | 1.91491 |
|               | ---          | 0.004024 | 5.94168 | 5.28196 | 4.3451  | 1.91435 | 0.936857 | 1.91435 |
| Nck2          | NM_010879    | 0.000786 | 9.16756 | 8.41079 | 7.4754  | 1.91241 | 0.935393 | 1.91241 |
| Pon2          | NM_183308    | 0.005645 | 5.41249 | 8.63152 | 7.69718 | 1.91102 | 0.934344 | 1.91102 |
| D330041H03Rik | NR_033554    | 0.00335  | 6.24568 | 5.88509 | 4.95152 | 1.91    | 0.933576 | 1.91    |
| Hn1l          | NM_198937    | 0.006032 | 5.31344 | 8.86733 | 7.93503 | 1.90832 | 0.932305 | 1.90832 |
| Mapk8ip3      | NM_013931    | 0.000226 | 12.6363 | 8.6633  | 7.73133 | 1.90787 | 0.931966 | 1.90787 |
| Extl1         | NM_019578    | 0.002862 | 6.51691 | 5.98887 | 5.05806 | 1.90634 | 0.930806 | 1.90634 |
| Slurp1        | NM_020519    | 0.004427 | 5.78827 | 6.0627  | 5.13279 | 1.90515 | 0.929908 | 1.90515 |
| Ift140        | NM_134126    | 0.00121  | 8.19096 | 7.572   | 6.6437  | 1.90303 | 0.928296 | 1.90303 |
| Gm3258        | NM_011509    | 0.005826 | 5.36511 | 9.1971  | 8.26928 | 1.9024  | 0.927817 | 1.9024  |
| Wbp1          | NM_016757    | 0.001831 | 7.3438  | 9.57942 | 8.65179 | 1.90215 | 0.927634 | 1.90215 |
| Immt          | NM_029673    | 0.00029  | 11.8575 | 9.89333 | 8.96612 | 1.9016  | 0.927213 | 1.9016  |
|               | ---          | 0.003454 | 6.19421 | 9.92042 | 8.99354 | 1.90117 | 0.926886 | 1.90117 |
| Brp16         | NM_021555    | 0.002232 | 6.96644 | 7.62639 | 6.70142 | 1.89865 | 0.924974 | 1.89865 |
| Zc3h3         | NM_172121    | 0.000159 | 13.8287 | 7.22746 | 6.30326 | 1.89763 | 0.924201 | 1.89763 |
| Prg2          | NM_008920    | 0.000456 | 10.5552 | 5.05797 | 4.13389 | 1.89748 | 0.924082 | 1.89748 |
| Brms1         | NM_134155    | 5.37E-05 | 18.1935 | 7.65634 | 6.73404 | 1.89513 | 0.922298 | 1.89513 |
| Kirrel        | NM_001170985 | 0.004059 | 5.92743 | 9.25476 | 8.33277 | 1.89473 | 0.92199  | 1.89473 |
| Mcts2         | NM_025543    | 0.004695 | 5.69558 | 8.3299  | 7.4085  | 1.89395 | 0.921397 | 1.89395 |

|               |                   |          |         |         |         |         |          |         |
|---------------|-------------------|----------|---------|---------|---------|---------|----------|---------|
| Dusp3         | NM_028207         | 0.001744 | 7.43935 | 7.79846 | 6.87736 | 1.89356 | 0.9211   | 1.89356 |
| Lzts2         | NM_145503         | 0.001427 | 7.84355 | 8.52193 | 7.60127 | 1.89298 | 0.920663 | 1.89298 |
| 2410042D21Rik | BC080661          | 0.003151 | 6.34987 | 8.58062 | 7.6603  | 1.89253 | 0.920314 | 1.89253 |
| Zcchc10       | NM_026479         | 0.001547 | 7.67839 | 5.28485 | 4.36482 | 1.89215 | 0.92003  | 1.89215 |
|               | ---               | 0.004413 | 5.79338 | 6.95498 | 6.03522 | 1.8918  | 0.919761 | 1.8918  |
|               | ---               | 0.000836 | 9.02276 | 11.5853 | 10.6657 | 1.89164 | 0.919639 | 1.89164 |
|               | ---               | 0.006892 | 5.11884 | 6.68237 | 5.76319 | 1.89105 | 0.919188 | 1.89105 |
| 1110012J17Rik | NM_001114098      | 0.004548 | 5.74575 | 6.42602 | 5.50683 | 1.89105 | 0.919186 | 1.89105 |
| Pkd1          | NM_013630         | 1.28E-05 | 26.097  | 8.38814 | 7.46969 | 1.89008 | 0.918445 | 1.89008 |
| Ampd3         | NM_009667         | 0.000789 | 9.15853 | 6.76157 | 5.8434  | 1.88971 | 0.918167 | 1.88971 |
| Vps25         | NM_026776         | 0.001619 | 7.58632 | 9.74397 | 8.82631 | 1.88906 | 0.917667 | 1.88906 |
| Gm14391       | NM_001099308      | 0.001375 | 7.92082 | 11.1748 | 10.2573 | 1.88877 | 0.91745  | 1.88877 |
| Gm14391       | NM_001099308      | 0.001375 | 7.92082 | 11.1748 | 10.2573 | 1.88877 | 0.91745  | 1.88877 |
| Gas2l1        | NM_144560         | 0.000425 | 10.7483 | 7.39596 | 6.47924 | 1.88781 | 0.916716 | 1.88781 |
| Tbp           | NM_013684         | 0.000786 | 9.16774 | 8.28531 | 7.3688  | 1.88755 | 0.916512 | 1.88755 |
| Cnot1         | NM_153164         | 0.001231 | 8.15358 | 9.3583  | 8.44208 | 1.88717 | 0.916222 | 1.88717 |
| Tubgcp6       | NM_001163319      | 0.00027  | 12.0715 | 7.43845 | 6.52369 | 1.88525 | 0.914758 | 1.88525 |
|               | ---               | 0.006485 | 5.20695 | 9.52216 | 8.60755 | 1.88506 | 0.914608 | 1.88506 |
|               | ---               | 0.000323 | 11.5349 | 10.2808 | 9.36656 | 1.88455 | 0.914217 | 1.88455 |
| Dnmt3a        | NM_007872         | 0.000747 | 9.28815 | 7.08286 | 6.16891 | 1.88419 | 0.913943 | 1.88419 |
| Ppp1r16a      | NM_033371         | 0.000452 | 10.5786 | 7.6459  | 6.73219 | 1.88388 | 0.913706 | 1.88388 |
| Ankrd28       | NM_001024604      | 0.004404 | 5.79645 | 9.83813 | 8.92479 | 1.88341 | 0.913348 | 1.88341 |
| Mfsd7b        | NM_001081259      | 0.003285 | 6.27884 | 7.78271 | 6.86973 | 1.88293 | 0.912977 | 1.88293 |
| Plxnb2        | NM_138749         | 5.82E-05 | 17.8244 | 10.5853 | 9.6724  | 1.88277 | 0.912855 | 1.88277 |
|               | ENSMUST0000008754 |          |         |         |         |         |          |         |
| Gm10209       | 4                 | 4.27E-05 | 19.2744 | 5.88221 | 4.96983 | 1.88215 | 0.912381 | 1.88215 |
| Gm10825       | NR_028580         | 0.004831 | 5.65085 | 6.61781 | 5.70574 | 1.88175 | 0.912072 | 1.88175 |
| Hdgf          | NM_008231         | 0.001958 | 7.21359 | 9.77111 | 8.85974 | 1.88082 | 0.911362 | 1.88082 |
| Pitpna        | NM_008850         | 0.000455 | 10.559  | 10.8076 | 9.89751 | 1.87921 | 0.910124 | 1.87921 |
| Chuk          | NM_007700         | 0.000881 | 8.90056 | 8.90099 | 7.99139 | 1.87853 | 0.909603 | 1.87853 |
| Tbl1xr1       | NM_030732         | 0.000367 | 11.158  | 9.05589 | 8.14641 | 1.87836 | 0.909475 | 1.87836 |

|          |              |          |         |         |         |         |          |         |
|----------|--------------|----------|---------|---------|---------|---------|----------|---------|
| Mrpl18   | NM_026310    | 0.001329 | 7.99154 | 9.76428 | 8.85528 | 1.87774 | 0.908994 | 1.87774 |
| Arf2     | NM_007477    | 0.000234 | 12.5175 | 9.13218 | 8.2234  | 1.87745 | 0.908775 | 1.87745 |
| Zmiz2    | NM_028601    | 0.000221 | 12.7063 | 7.5371  | 6.62844 | 1.87731 | 0.908666 | 1.87731 |
| Chd7     | NM_001081417 | 0.001684 | 7.50756 | 7.27923 | 6.37136 | 1.87627 | 0.907871 | 1.87627 |
| Immp1l   | NM_028260    | 0.001645 | 7.55434 | 8.44736 | 7.53968 | 1.87603 | 0.907683 | 1.87603 |
| Slc9a5   | NM_001081332 | 0.001158 | 8.28686 | 6.31609 | 5.40863 | 1.87574 | 0.907458 | 1.87574 |
| Pola2    | NM_008893    | 0.003169 | 6.34042 | 7.65584 | 6.74865 | 1.87539 | 0.907188 | 1.87539 |
| Tapbp    | NM_001025313 | 0.000103 | 15.432  | 10.8392 | 9.93209 | 1.87533 | 0.907145 | 1.87533 |
| Esf1     | NM_001081090 | 0.002506 | 6.75408 | 8.68497 | 7.77794 | 1.87518 | 0.907032 | 1.87518 |
| Hdac5    | NM_001077696 | 0.000267 | 12.1058 | 9.01618 | 8.10948 | 1.87475 | 0.906697 | 1.87475 |
|          | ---          | 0.004163 | 5.8867  | 9.86044 | 8.95401 | 1.87441 | 0.906438 | 1.87441 |
| Gtf2i    | NM_001080746 | 0.003516 | 6.16411 | 10.166  | 9.26106 | 1.87241 | 0.904898 | 1.87241 |
| Kcnn1    | NM_032397    | 0.000753 | 9.27176 | 6.61753 | 5.71281 | 1.87219 | 0.904728 | 1.87219 |
| Zfp955a  | NM_029952    | 0.004857 | 5.64258 | 8.43608 | 7.53179 | 1.87163 | 0.904296 | 1.87163 |
| Gm6924   | NM_001177567 | 0.000731 | 9.34207 | 4.96303 | 4.05887 | 1.87146 | 0.904166 | 1.87146 |
| Rfc4     | NM_145480    | 0.005966 | 5.32993 | 7.27134 | 6.36719 | 1.87144 | 0.904152 | 1.87144 |
| Cgn      | NM_001037711 | 0.004919 | 5.62279 | 6.19989 | 5.29706 | 1.86973 | 0.902833 | 1.86973 |
| Chd7     | NM_001081417 | 0.000991 | 8.63081 | 5.67269 | 4.77021 | 1.86928 | 0.902479 | 1.86928 |
| Gm4302   | NM_001166634 | 0.003836 | 6.01979 | 5.61427 | 4.71287 | 1.86788 | 0.901403 | 1.86788 |
| Cyp2u1   | NM_027816    | 0.001769 | 7.41127 | 6.09717 | 5.19662 | 1.86679 | 0.900556 | 1.86679 |
| Ppp1r14b | NM_008889    | 5.96E-05 | 17.7195 | 10.0048 | 9.10486 | 1.86599 | 0.899942 | 1.86599 |
| Xpo1     | NM_134014    | 0.001309 | 8.02344 | 9.87075 | 8.972   | 1.86445 | 0.898752 | 1.86445 |
| Fam111a  | BC038020     | 0.005924 | 5.34043 | 8.07642 | 7.179   | 1.86273 | 0.897422 | 1.86273 |
| Rnf114   | NM_030743    | 0.000602 | 9.82217 | 9.50887 | 8.613   | 1.86074 | 0.895877 | 1.86074 |
| Syne2    | NM_001005510 | 0.001273 | 8.08247 | 5.90373 | 5.00881 | 1.8595  | 0.894916 | 1.8595  |
| Gm12185  | NM_001045540 | 0.001485 | 7.76112 | 4.11303 | 3.21913 | 1.8582  | 0.893903 | 1.8582  |
| Klc4     | NM_029091    | 0.001184 | 8.23746 | 7.0834  | 6.19053 | 1.85688 | 0.892877 | 1.85688 |
| Vps37b   | NM_177876    | 0.002453 | 6.79255 | 6.82641 | 5.93367 | 1.8567  | 0.892737 | 1.8567  |
| Nup88    | NM_172394    | 0.000567 | 9.97845 | 9.0112  | 8.11878 | 1.85628 | 0.892415 | 1.85628 |
| Hps3     | NM_080634    | 0.001176 | 8.2536  | 7.7607  | 6.8686  | 1.85587 | 0.892099 | 1.85587 |
| Nr1h4    | NM_001163700 | 0.002967 | 6.45382 | 5.02915 | 4.13734 | 1.8555  | 0.891809 | 1.8555  |

|               |                 |          |         |         |         |         |          |         |
|---------------|-----------------|----------|---------|---------|---------|---------|----------|---------|
| Mreg          | NM_001005423    | 0.002219 | 6.9773  | 6.35132 | 5.45992 | 1.85497 | 0.8914   | 1.85497 |
| Mrpl1         | NM_053158       | 0.005801 | 5.37151 | 7.8861  | 6.99496 | 1.85464 | 0.891141 | 1.85464 |
|               | 8-Sep NM_033144 | 0.005554 | 5.43699 | 8.41128 | 7.52015 | 1.85463 | 0.89113  | 1.85463 |
| H1f0          | NM_008197       | 0.002163 | 7.0253  | 10.6524 | 9.76166 | 1.85406 | 0.890689 | 1.85406 |
| Men1          | NM_008583       | 0.000814 | 9.08442 | 8.91954 | 8.02938 | 1.85339 | 0.890164 | 1.85339 |
| Gfm1          | NM_138591       | 0.001166 | 8.27034 | 8.87836 | 7.98825 | 1.85332 | 0.890111 | 1.85332 |
| Grwd1         | NM_153419       | 0.002648 | 6.65451 | 7.78224 | 6.89236 | 1.85302 | 0.889881 | 1.85302 |
| Kcnab2        | NM_010598       | 0.004337 | 5.82111 | 6.31504 | 5.42534 | 1.85279 | 0.889702 | 1.85279 |
| Rpap1         | NM_177294       | 2.43E-06 | 39.5947 | 6.94757 | 6.0581  | 1.85249 | 0.889467 | 1.85249 |
| Vac14         | NM_146216       | 0.000825 | 9.05321 | 8.46246 | 7.57352 | 1.85182 | 0.88894  | 1.85182 |
|               | ---             | 0.005558 | 5.4359  | 8.16713 | 7.27826 | 1.85172 | 0.888863 | 1.85172 |
|               | ---             | 0.000409 | 10.8538 | 9.16334 | 8.27491 | 1.85116 | 0.888432 | 1.85116 |
| Fhod1         | NM_177699       | 2.69E-05 | 21.6621 | 7.33791 | 6.44995 | 1.85056 | 0.887961 | 1.85056 |
| Vsig10        | NM_001033311    | 0.005573 | 5.43188 | 6.30006 | 5.41222 | 1.85041 | 0.887845 | 1.85041 |
| Tlk2          | NM_001112705    | 0.006988 | 5.09896 | 7.87698 | 6.98917 | 1.85037 | 0.887813 | 1.85037 |
| Dclre1a       | NM_018831       | 0.001719 | 7.46784 | 8.01054 | 7.12307 | 1.84993 | 0.887469 | 1.84993 |
| Mettl2        | NM_172567       | 0.00204  | 7.13554 | 8.82795 | 7.94071 | 1.84964 | 0.887244 | 1.84964 |
| Nbeal2        | NM_183276       | 0.001675 | 7.51898 | 6.32429 | 5.43714 | 1.84952 | 0.88715  | 1.84952 |
| Itgb3         | NM_016780       | 0.003918 | 5.98529 | 8.24455 | 7.3578  | 1.84901 | 0.886756 | 1.84901 |
| Cyth2         | NM_011181       | 0.00028  | 11.9618 | 8.65953 | 7.77285 | 1.84892 | 0.886685 | 1.84892 |
| Rest          | NM_011263       | 0.001494 | 7.74906 | 8.62308 | 7.73662 | 1.84864 | 0.886463 | 1.84864 |
|               | ---             | 0.000551 | 10.0528 | 9.30995 | 8.42369 | 1.84837 | 0.886257 | 1.84837 |
| Znhit3        | NM_001005223    | 1.30E-05 | 26.0019 | 7.24174 | 6.35628 | 1.84736 | 0.885462 | 1.84736 |
|               | ---             | 0.006997 | 5.09711 | 10.4908 | 9.60558 | 1.84701 | 0.88519  | 1.84701 |
| Scrib         | NM_134089       | 0.000102 | 15.4489 | 7.96616 | 7.08099 | 1.84698 | 0.88517  | 1.84698 |
| Cecr5         | NM_144815       | 0.000402 | 10.9005 | 7.72781 | 6.84414 | 1.84506 | 0.883668 | 1.84506 |
| Ssx2ip        | NM_138744       | 0.000284 | 11.917  | 7.39817 | 6.51554 | 1.84373 | 0.882628 | 1.84373 |
| A130049A11Rik | NR_030676       | 0.002531 | 6.73622 | 3.77103 | 2.8885  | 1.8436  | 0.882525 | 1.8436  |
| Epb4.111      | NM_013510       | 0.000975 | 8.66775 | 8.55778 | 7.67588 | 1.8428  | 0.881901 | 1.8428  |
| Kctd10        | NM_001159941    | 0.000366 | 11.1698 | 9.7427  | 8.86158 | 1.84181 | 0.881122 | 1.84181 |
| Tnrc6b        | NM_144812       | 8.72E-05 | 16.0933 | 8.64349 | 7.76337 | 1.84054 | 0.880126 | 1.84054 |

|               |              |          |         |         |         |         |          |         |
|---------------|--------------|----------|---------|---------|---------|---------|----------|---------|
| Spg11         | NM_145531    | 0.002866 | 6.51481 | 7.34522 | 6.46524 | 1.84035 | 0.879981 | 1.84035 |
| Hsf1          | NM_008296    | 0.000241 | 12.4257 | 8.99115 | 8.11124 | 1.84027 | 0.879915 | 1.84027 |
| Ppp1r14b      | NM_008889    | 0.000135 | 14.3991 | 10.021  | 9.14119 | 1.84013 | 0.879809 | 1.84013 |
|               | ---          | 8.02E-05 | 16.4369 | 11.8934 | 11.0144 | 1.83913 | 0.879021 | 1.83913 |
| Apbb2         | NM_009686    | 0.001529 | 7.70151 | 9.10344 | 8.22549 | 1.83777 | 0.877955 | 1.83777 |
| Zfp608        | NM_175751    | 0.003353 | 6.24409 | 7.65092 | 6.77332 | 1.83731 | 0.877592 | 1.83731 |
|               | ---          | 0.000217 | 12.7636 | 10.8294 | 9.95199 | 1.83709 | 0.877421 | 1.83709 |
| Tcf20         | NM_001114140 | 0.001213 | 8.18562 | 9.16451 | 8.28709 | 1.83709 | 0.87742  | 1.83709 |
| BC049349      | NM_001164581 | 0.002213 | 6.98251 | 5.52309 | 4.64654 | 1.83598 | 0.876551 | 1.83598 |
| Naa40         | NM_027643    | 0.004605 | 5.72582 | 7.42967 | 6.55315 | 1.83595 | 0.876527 | 1.83595 |
| Tspo          | NM_009775    | 0.001818 | 7.35717 | 11.1722 | 10.2961 | 1.83547 | 0.876148 | 1.83547 |
| Bcl2l13       | NM_153516    | 0.003271 | 6.28592 | 8.2696  | 7.39383 | 1.83498 | 0.875768 | 1.83498 |
| Nf2           | NM_010898    | 0.000482 | 10.4047 | 8.33808 | 7.4624  | 1.83488 | 0.875686 | 1.83488 |
| Ccdc91        | NM_025911    | 0.001921 | 7.25074 | 8.57213 | 7.69688 | 1.83433 | 0.875256 | 1.83433 |
| Tsc2          | NM_011647    | 0.002115 | 7.06722 | 8.59517 | 7.72071 | 1.83333 | 0.874467 | 1.83333 |
| Nfya          | NM_001110832 | 9.35E-05 | 15.809  | 8.72194 | 7.84778 | 1.83294 | 0.874158 | 1.83294 |
| Prpf8         | NM_138659    | 0.000173 | 13.5302 | 10.5684 | 9.69455 | 1.83259 | 0.873884 | 1.83259 |
| Myg1          | NM_021713    | 5.74E-05 | 17.8917 | 8.16958 | 7.2962  | 1.83195 | 0.873377 | 1.83195 |
| Senp1         | NM_144851    | 0.000397 | 10.9336 | 7.99304 | 7.11967 | 1.83194 | 0.873371 | 1.83194 |
| Tmbim1        | NM_027154    | 9.67E-05 | 15.6771 | 10.5717 | 9.69848 | 1.83173 | 0.873207 | 1.83173 |
| Slc9a2        | NM_001033289 | 0.002062 | 7.11542 | 5.10676 | 4.23423 | 1.83087 | 0.87253  | 1.83087 |
|               | ---          | 0.001467 | 7.78736 | 10.0055 | 9.13341 | 1.83026 | 0.872048 | 1.83026 |
| 5930434B04Rik | BC027257     | 0.005206 | 5.53542 | 5.89047 | 5.01884 | 1.82973 | 0.871628 | 1.82973 |
|               | ---          | 0.003417 | 6.21206 | 9.29365 | 8.423   | 1.82849 | 0.87065  | 1.82849 |
| Wbscr17       | NM_145218    | 0.002503 | 6.75603 | 7.04942 | 6.17907 | 1.82811 | 0.87035  | 1.82811 |
| Dennd5b       | NM_177192    | 0.004494 | 5.76435 | 6.6566  | 5.78682 | 1.82738 | 0.869777 | 1.82738 |
| Eif3m         | NM_145380    | 0.005042 | 5.58454 | 8.74899 | 7.87927 | 1.82731 | 0.869721 | 1.82731 |
| Eepd1         | NM_026189    | 0.002622 | 6.67241 | 6.1762  | 5.30767 | 1.8258  | 0.868529 | 1.8258  |
|               | ---          | 0.005326 | 5.5005  | 4.40053 | 3.53203 | 1.82577 | 0.868504 | 1.82577 |
| Ece1          | NM_199307    | 0.000593 | 9.86021 | 8.32718 | 7.45921 | 1.82508 | 0.867963 | 1.82508 |
|               | ---          | 0.006621 | 5.17684 | 7.53024 | 6.66317 | 1.82395 | 0.867064 | 1.82395 |

|               |           |          |         |         |         |         |          |         |
|---------------|-----------|----------|---------|---------|---------|---------|----------|---------|
| Wdr47         | NM_181400 | 0.00191  | 7.26125 | 7.44858 | 6.58234 | 1.82291 | 0.86624  | 1.82291 |
|               | ---       | 0.000495 | 10.3316 | 10.7882 | 9.92205 | 1.82286 | 0.866203 | 1.82286 |
| Mfge8         | NM_008594 | 0.000269 | 12.0793 | 10.8609 | 9.99525 | 1.82211 | 0.865607 | 1.82211 |
| Ppp2r1a       | NM_016891 | 0.000134 | 14.4228 | 10.7685 | 9.90367 | 1.82111 | 0.864819 | 1.82111 |
| Nub1          | NM_016736 | 0.001075 | 8.45009 | 9.29304 | 8.42832 | 1.82099 | 0.86472  | 1.82099 |
|               | ---       | 0.000652 | 9.62187 | 10.8565 | 9.9922  | 1.82052 | 0.864352 | 1.82052 |
| Fam173b       | BC030179  | 0.000935 | 8.76378 | 8.01222 | 7.14794 | 1.82043 | 0.86428  | 1.82043 |
| Cdc27         | NM_145436 | 0.000184 | 13.3128 | 9.64737 | 8.78312 | 1.82039 | 0.864245 | 1.82039 |
| Abca3         | NM_013855 | 0.001434 | 7.83336 | 7.75287 | 6.88897 | 1.81995 | 0.863901 | 1.81995 |
| Slc25a30      | NM_026232 | 0.001725 | 7.46079 | 8.6836  | 7.81992 | 1.81967 | 0.863681 | 1.81967 |
| Cox15         | NM_144874 | 0.005211 | 5.53409 | 7.93134 | 7.06797 | 1.81928 | 0.863366 | 1.81928 |
| Vps13b        | NM_177151 | 0.004864 | 5.64027 | 7.9075  | 7.04422 | 1.81918 | 0.863287 | 1.81918 |
| Mus81         | NM_027877 | 0.001148 | 8.30542 | 7.85638 | 6.99325 | 1.81897 | 0.863125 | 1.81897 |
| Irak2         | NM_172161 | 0.004425 | 5.78909 | 6.48586 | 5.62414 | 1.8172  | 0.86172  | 1.8172  |
| Thoc5         | NM_172438 | 0.00108  | 8.43921 | 8.89482 | 8.03316 | 1.81712 | 0.861656 | 1.81712 |
| Grn           | NM_008175 | 0.00014  | 14.268  | 11.5585 | 10.6973 | 1.81659 | 0.861229 | 1.81659 |
| 2310003L22Rik | NM_027093 | 0.002414 | 6.82211 | 5.56887 | 4.70764 | 1.81658 | 0.861228 | 1.81658 |
| Prpf31        | NM_027328 | 0.002966 | 6.45472 | 8.74631 | 7.88558 | 1.81597 | 0.860738 | 1.81597 |
| Nr2f2         | NM_009697 | 0.003048 | 6.40758 | 9.37533 | 8.51552 | 1.8148  | 0.859811 | 1.8148  |
|               | ---       | 0.006717 | 5.15597 | 8.65332 | 7.79351 | 1.8148  | 0.859808 | 1.8148  |
| Pafah1b1      | NM_013625 | 2.87E-05 | 21.3043 | 9.59856 | 8.73884 | 1.81468 | 0.859715 | 1.81468 |
| Laptm4b       | NM_033521 | 0.000143 | 14.1916 | 10.7565 | 9.89717 | 1.81418 | 0.859317 | 1.81418 |
| Fez2          | NM_199448 | 0.000909 | 8.82819 | 8.29783 | 7.4401  | 1.81219 | 0.857735 | 1.81219 |
| Ikzf2         | NM_011770 | 0.003773 | 6.04716 | 6.5384  | 5.68116 | 1.81157 | 0.857238 | 1.81157 |
| Ube3b         | NM_054093 | 0.004028 | 5.94015 | 8.02868 | 7.17207 | 1.81078 | 0.856611 | 1.81078 |
| Rfc1          | NM_011258 | 0.001721 | 7.46554 | 8.595   | 7.7385  | 1.81065 | 0.856504 | 1.81065 |
| Prdm16        | NM_027504 | 0.006234 | 5.26474 | 6.1206  | 5.26418 | 1.81053 | 0.856412 | 1.81053 |
| Gm4371        | NR_028311 | 0.004631 | 5.71712 | 4.44324 | 3.58714 | 1.81013 | 0.856096 | 1.81013 |
|               | ---       | 0.00197  | 7.2021  | 8.04276 | 7.18693 | 1.8098  | 0.855833 | 1.8098  |
|               | ---       | 0.002966 | 6.45471 | 7.1324  | 6.2768  | 1.80951 | 0.855598 | 1.80951 |
| Eftud2        | NM_011431 | 0.000133 | 14.4718 | 9.25599 | 8.40058 | 1.80926 | 0.855402 | 1.80926 |

|               |              |          |         |         |         |         |          |         |
|---------------|--------------|----------|---------|---------|---------|---------|----------|---------|
| Pign          | NM_013784    | 0.000652 | 9.62499 | 9.55295 | 8.69768 | 1.80909 | 0.855262 | 1.80909 |
| Pigt          | NM_133779    | 6.66E-05 | 17.2293 | 9.69534 | 8.84049 | 1.80857 | 0.854853 | 1.80857 |
| Ttc1          | NM_133795    | 0.000115 | 14.9897 | 8.12833 | 7.27426 | 1.80759 | 0.85407  | 1.80759 |
| Aup1          | NM_007517    | 8.25E-05 | 16.3227 | 10.4876 | 9.63366 | 1.80747 | 0.853969 | 1.80747 |
| Man2b2        | NM_008550    | 0.001344 | 7.96863 | 8.29645 | 7.444   | 1.80556 | 0.85245  | 1.80556 |
| Kpna4         | NM_008467    | 0.004491 | 5.76547 | 8.06196 | 7.21003 | 1.80492 | 0.851932 | 1.80492 |
| Supt4h1       | NM_009296    | 0.000379 | 11.0656 | 10.3407 | 9.48878 | 1.80485 | 0.851883 | 1.80485 |
| Cyb5r3        | NM_029787    | 0.000376 | 11.093  | 11.7975 | 10.9459 | 1.80451 | 0.851606 | 1.80451 |
| Pex13         | NM_023651    | 0.000105 | 15.3379 | 8.60902 | 7.75771 | 1.80414 | 0.851307 | 1.80414 |
| Dnmbp         | NM_028029    | 0.006712 | 5.15705 | 7.88563 | 7.03459 | 1.80379 | 0.851034 | 1.80379 |
| Ndufs1        | NM_001160038 | 0.000117 | 14.9353 | 10.0522 | 9.2012  | 1.80371 | 0.85097  | 1.80371 |
| Naa15         | NM_053089    | 0.005025 | 5.58978 | 9.18356 | 8.3329  | 1.80333 | 0.85066  | 1.80333 |
| Cdk5rap1      | NM_025876    | 0.001185 | 8.23602 | 6.61253 | 5.76307 | 1.80182 | 0.849457 | 1.80182 |
| Pak4          | NM_027470    | 0.002531 | 6.73622 | 7.24061 | 6.39194 | 1.80084 | 0.848674 | 1.80084 |
| Kalrn         | NM_177357    | 0.003716 | 6.07212 | 6.99908 | 6.15122 | 1.79983 | 0.847861 | 1.79983 |
| Erlin1        | NM_145502    | 0.000392 | 10.971  | 8.24428 | 7.39655 | 1.79966 | 0.847727 | 1.79966 |
| Nbr1          | NM_008676    | 0.003168 | 6.34061 | 10.5003 | 9.65275 | 1.79941 | 0.847527 | 1.79941 |
| Snx27         | NM_029721    | 0.005746 | 5.38582 | 8.2734  | 7.42604 | 1.7992  | 0.847354 | 1.7992  |
| Wfs1          | NM_011716    | 0.004774 | 5.66952 | 7.50974 | 6.66325 | 1.79813 | 0.846497 | 1.79813 |
| Chchd7        | NM_181391    | 0.000225 | 12.6465 | 8.44802 | 7.60191 | 1.79765 | 0.846111 | 1.79765 |
| Nol4          | NM_199024    | 0.001641 | 7.5599  | 5.68669 | 4.84202 | 1.79586 | 0.844671 | 1.79586 |
| Mphosph9      | NM_001081323 | 0.000895 | 8.86202 | 6.20667 | 5.36203 | 1.79582 | 0.844646 | 1.79582 |
| U05342        | NR_024093    | 0.000641 | 9.66491 | 7.69215 | 6.84786 | 1.79539 | 0.844294 | 1.79539 |
| Tnfaip1       | NM_009395    | 0.001543 | 7.68345 | 8.59245 | 7.74838 | 1.7951  | 0.844063 | 1.7951  |
| Ap4b1         | NM_026193    | 5.32E-06 | 32.5394 | 8.56487 | 7.72088 | 1.79501 | 0.843988 | 1.79501 |
| Cstf2t        | NM_031249    | 0.006492 | 5.20549 | 8.24152 | 7.39777 | 1.79471 | 0.843749 | 1.79471 |
| Plrg1         | NM_016784    | 3.19E-05 | 20.7413 | 10.6087 | 9.76534 | 1.79426 | 0.843386 | 1.79426 |
| 9130023H24Rik | NM_177001    | 0.000476 | 10.439  | 7.89196 | 7.04876 | 1.79402 | 0.8432   | 1.79402 |
| Zfat          | NM_001145888 | 0.002989 | 6.44119 | 5.92906 | 5.08698 | 1.79263 | 0.842081 | 1.79263 |
| Nsf           | NM_008740    | 0.000255 | 12.2533 | 9.09063 | 8.24899 | 1.79209 | 0.841641 | 1.79209 |
| ---           |              | 0.000298 | 11.7727 | 11.1651 | 10.3236 | 1.79193 | 0.841513 | 1.79193 |

|               |                   |          |         |         |         |         |          |         |
|---------------|-------------------|----------|---------|---------|---------|---------|----------|---------|
|               | ---               | 0.006162 | 5.28207 | 11.1654 | 10.3244 | 1.79134 | 0.841041 | 1.79134 |
| E430025E21Rik | NM_153548         | 0.000145 | 14.1382 | 10.4164 | 9.57544 | 1.7912  | 0.840924 | 1.7912  |
| Nf1           | NM_010897         | 0.005395 | 5.48091 | 8.76262 | 7.92254 | 1.79016 | 0.840087 | 1.79016 |
| Efcab2        | NM_026626         | 0.000977 | 8.66387 | 4.66088 | 3.82148 | 1.78931 | 0.839403 | 1.78931 |
| Katnb1        | NM_028805         | 0.000665 | 9.57561 | 7.93611 | 7.09704 | 1.7889  | 0.839076 | 1.7889  |
|               | ---               | 0.00614  | 5.28716 | 6.98416 | 6.1459  | 1.78789 | 0.838256 | 1.78789 |
| Tagap1        | NM_147155         | 0.003244 | 6.3004  | 7.98839 | 7.15014 | 1.78787 | 0.838245 | 1.78787 |
|               | ENSMUST0000006707 |          |         |         |         |         |          |         |
| Gm9938        | 7                 | 0.000514 | 10.2329 | 8.06874 | 7.23061 | 1.78773 | 0.838125 | 1.78773 |
| Mapk11        | NM_011161         | 0.004172 | 5.88321 | 6.67534 | 5.83723 | 1.78771 | 0.838109 | 1.78771 |
| Pef1          | NM_026441         | 0.000522 | 10.1922 | 8.94328 | 8.10589 | 1.78683 | 0.837399 | 1.78683 |
| Chd7          | NM_001081417      | 0.000439 | 10.6572 | 5.29903 | 4.4618  | 1.78662 | 0.837232 | 1.78662 |
| Nup205        | NM_027513         | 0.002371 | 6.85463 | 9.005   | 8.16991 | 1.78397 | 0.835089 | 1.78397 |
| Ogfr          | NM_031373         | 0.000272 | 12.0515 | 9.24436 | 8.4093  | 1.78394 | 0.835066 | 1.78394 |
| Tcp1          | NM_013686         | 0.001539 | 7.68896 | 11.148  | 10.3144 | 1.78212 | 0.833594 | 1.78212 |
| Magi1         | NM_001029850      | 0.000666 | 9.57062 | 7.35871 | 6.52516 | 1.78206 | 0.833546 | 1.78206 |
| Pacsin2       | NM_011862         | 0.001883 | 7.28949 | 9.56684 | 8.73331 | 1.78203 | 0.833522 | 1.78203 |
| Usp32         | NM_001029934      | 0.002964 | 6.45613 | 9.44991 | 8.61747 | 1.78069 | 0.83244  | 1.78069 |
| Fxr1          | NM_001113188      | 0.003478 | 6.18248 | 10.2617 | 9.42938 | 1.7805  | 0.832284 | 1.7805  |
| Trim8         | NM_053100         | 0.000106 | 15.3248 | 7.99599 | 7.16418 | 1.77992 | 0.831816 | 1.77992 |
| Tbcd          | NM_029878         | 0.000539 | 10.1073 | 9.17136 | 8.34068 | 1.77852 | 0.83068  | 1.77852 |
| Acot8         | NM_133240         | 0.003921 | 5.98404 | 6.78243 | 5.95187 | 1.77838 | 0.830562 | 1.77838 |
| Vezt          | NM_172538         | 0.001829 | 7.34549 | 7.53566 | 6.70576 | 1.77757 | 0.829903 | 1.77757 |
|               | ---               | 3.39E-05 | 20.4256 | 8.93399 | 8.10444 | 1.77713 | 0.829547 | 1.77713 |
| Rhbdl3        | NM_139228         | 0.003304 | 6.26932 | 6.76365 | 5.93413 | 1.7771  | 0.829522 | 1.7771  |
| Prkaa1        | NM_001013367      | 0.000283 | 11.9249 | 10.462  | 9.63303 | 1.77646 | 0.829003 | 1.77646 |
| Cog4          | NM_133973         | 0.003096 | 6.38016 | 9.10219 | 8.27319 | 1.77645 | 0.829    | 1.77645 |
| Stard3        | NM_021547         | 0.003035 | 6.41486 | 8.71061 | 7.88192 | 1.77607 | 0.828687 | 1.77607 |
| Rsf1          | NM_001081267      | 0.000285 | 11.9082 | 8.6498  | 7.82122 | 1.77593 | 0.828577 | 1.77593 |
| Eif2s3x       | NM_012010         | 0.002059 | 7.11796 | 10.8574 | 10.0289 | 1.77586 | 0.828522 | 1.77586 |
| Dusp27        | NM_001033344      | 0.001443 | 7.82048 | 4.66372 | 3.83576 | 1.77517 | 0.827959 | 1.77517 |



|          |              |          |         |         |         |         |          |         |
|----------|--------------|----------|---------|---------|---------|---------|----------|---------|
| Ap4e1    | NM_175550    | 0.005592 | 5.42678 | 7.17514 | 6.3473  | 1.77504 | 0.827848 | 1.77504 |
| Rfx7     | NM_001033536 | 0.005377 | 5.48622 | 6.63149 | 5.80367 | 1.77501 | 0.82783  | 1.77501 |
|          | ---          | 0.003928 | 5.98105 | 7.64626 | 6.81847 | 1.77497 | 0.827795 | 1.77497 |
| Traf7    | NM_001172113 | 0.00011  | 15.165  | 9.37258 | 8.54526 | 1.77438 | 0.827317 | 1.77438 |
| Gm14403  | NR_036450    | 0.002389 | 6.84127 | 9.48108 | 8.65409 | 1.77398 | 0.82699  | 1.77398 |
| Mprlp    | NM_012027    | 0.001559 | 7.66321 | 9.62665 | 8.80018 | 1.77334 | 0.826468 | 1.77334 |
| Myl6b    | NM_172259    | 0.002545 | 6.72586 | 5.50951 | 4.68345 | 1.77284 | 0.826063 | 1.77284 |
| Gins3    | NM_030198    | 0.000682 | 9.51343 | 6.79228 | 5.96683 | 1.77209 | 0.82545  | 1.77209 |
|          | ---          | 0.001279 | 8.07256 | 7.58228 | 6.75691 | 1.772   | 0.825377 | 1.772   |
| Slc45a3  | NM_145977    | 0.000373 | 11.1104 | 6.36531 | 5.54014 | 1.77174 | 0.825163 | 1.77174 |
| Mrpl18   | NM_026310    | 0.001043 | 8.51598 | 7.87153 | 7.04646 | 1.77162 | 0.825066 | 1.77162 |
| Rptor    | NM_028898    | 0.000274 | 12.0268 | 7.88917 | 7.06423 | 1.77147 | 0.824944 | 1.77147 |
| Krt80    | NM_028770    | 0.001246 | 8.12907 | 6.18546 | 5.36089 | 1.77101 | 0.82457  | 1.77101 |
|          | ---          | 0.001048 | 8.50578 | 10.3023 | 9.47833 | 1.77033 | 0.824016 | 1.77033 |
| Card10   | NM_130859    | 0.006674 | 5.16512 | 6.6876  | 5.86372 | 1.77017 | 0.823888 | 1.77017 |
| Pik3r2   | NM_008841    | 0.006179 | 5.2779  | 8.55585 | 7.73217 | 1.76991 | 0.823677 | 1.76991 |
| Arhgef17 | NM_001081116 | 0.000777 | 9.19654 | 8.39903 | 7.57601 | 1.76911 | 0.823021 | 1.76911 |
| Dhx38    | NM_178380    | 1.77E-05 | 24.0507 | 7.77787 | 6.95505 | 1.76886 | 0.822823 | 1.76886 |
| Dnajb4   | NM_025926    | 0.001225 | 8.16547 | 10.0092 | 9.18645 | 1.76872 | 0.822704 | 1.76872 |
|          | ---          | 0.002976 | 6.449   | 8.54646 | 7.72416 | 1.76822 | 0.822299 | 1.76822 |
| Dgke     | NM_019505    | 0.003886 | 5.99873 | 6.14808 | 5.32601 | 1.76794 | 0.82207  | 1.76794 |
| Foxf1a   | NM_010426    | 0.001752 | 7.43021 | 8.44804 | 7.62626 | 1.76758 | 0.821774 | 1.76758 |
| Myo1c    | NM_008659    | 0.000615 | 9.76989 | 9.65808 | 8.83652 | 1.76732 | 0.821567 | 1.76732 |
| Dhx8     | NM_144831    | 0.000749 | 9.2834  | 8.34238 | 7.52201 | 1.76586 | 0.820369 | 1.76586 |
| Gpn1     | NM_133756    | 0.00456  | 5.74145 | 6.77107 | 5.95131 | 1.76511 | 0.819759 | 1.76511 |
| Bcl2l1   | NM_009743    | 0.001301 | 8.03678 | 7.99759 | 7.1779  | 1.76502 | 0.819687 | 1.76502 |
| Ccdc134  | NM_172428    | 0.00407  | 5.9233  | 7.52553 | 6.70595 | 1.76489 | 0.819575 | 1.76489 |
| Tinf2    | NM_145705    | 0.003166 | 6.34195 | 7.14612 | 6.32659 | 1.76483 | 0.819528 | 1.76483 |
| Zbtb46   | NM_028125    | 0.003817 | 6.02806 | 6.87581 | 6.05643 | 1.76466 | 0.819386 | 1.76466 |
| Eif4b    | NM_145625    | 0.002962 | 6.45709 | 10.7878 | 9.96964 | 1.76318 | 0.818179 | 1.76318 |
| Helq     | NM_001081107 | 0.000439 | 10.6598 | 6.8854  | 6.0674  | 1.76296 | 0.817997 | 1.76296 |

|               |              |          |         |         |         |         |          |         |
|---------------|--------------|----------|---------|---------|---------|---------|----------|---------|
|               | ---          | 0.000312 | 11.6296 | 10.2268 | 9.40882 | 1.76293 | 0.817972 | 1.76293 |
| Kat2a         | NM_020004    | 0.001832 | 7.34185 | 7.96713 | 7.14935 | 1.76269 | 0.817778 | 1.76269 |
| Efr3a         | NM_133766    | 0.000921 | 8.79642 | 10.4383 | 9.6209  | 1.76218 | 0.81736  | 1.76218 |
| Atpaf1        | NM_181040    | 0.006836 | 5.13058 | 6.82473 | 6.00779 | 1.76166 | 0.816937 | 1.76166 |
|               | ---          | 0.00244  | 6.8026  | 10.1808 | 9.36401 | 1.7615  | 0.816806 | 1.7615  |
| Zxdc          | NM_173002    | 0.006358 | 5.23593 | 7.86198 | 7.04575 | 1.76079 | 0.816224 | 1.76079 |
| Lyz1          | NM_013590    | 0.003    | 6.43462 | 4.83802 | 4.02198 | 1.76057 | 0.816047 | 1.76057 |
| Accn2         | NM_009597    | 0.001975 | 7.19719 | 5.83815 | 5.02277 | 1.75976 | 0.815377 | 1.75976 |
| Capza2        | NM_007604    | 1.74E-05 | 24.1503 | 11.0831 | 10.2688 | 1.7584  | 0.814265 | 1.7584  |
| 8430419L09Rik | NM_028982    | 0.002903 | 6.49201 | 7.11967 | 6.30665 | 1.75688 | 0.813017 | 1.75688 |
| Hexdc         | NM_001146073 | 0.005998 | 5.32188 | 6.46478 | 5.6518  | 1.75684 | 0.812979 | 1.75684 |
|               | ---          | 0.005412 | 5.4763  | 6.79304 | 5.98009 | 1.7568  | 0.812951 | 1.7568  |
| Ano8          | NM_001164679 | 0.00302  | 6.42313 | 7.96755 | 7.15539 | 1.75584 | 0.812164 | 1.75584 |
| 1810037117Rik | NM_024461    | 0.000534 | 10.1308 | 10.7548 | 9.94272 | 1.7558  | 0.812128 | 1.7558  |
| Lman2l        | NM_001013374 | 0.001325 | 7.99781 | 8.85472 | 8.04318 | 1.75508 | 0.811533 | 1.75508 |
| Pex1          | NM_027777    | 0.001212 | 8.18696 | 7.25446 | 6.44328 | 1.75465 | 0.811185 | 1.75465 |
| Etv3          | NM_001083318 | 0.000226 | 12.6344 | 8.14841 | 7.33736 | 1.75449 | 0.81105  | 1.75449 |
| Ahcyl2        | NM_021414    | 0.000998 | 8.61421 | 9.09902 | 8.28871 | 1.75359 | 0.810309 | 1.75359 |
| 1110014N23Rik | NM_001081041 | 0.000476 | 10.4357 | 8.20746 | 7.39723 | 1.75348 | 0.810225 | 1.75348 |
| Arrb1         | NM_177231    | 0.00098  | 8.65477 | 6.85124 | 6.04141 | 1.753   | 0.809822 | 1.753   |
| Gm14403       | NR_036450    | 0.003856 | 6.01135 | 6.82991 | 6.02067 | 1.7523  | 0.809246 | 1.7523  |
| Gm14288       | NM_001033123 | 0.003856 | 6.01135 | 6.82991 | 6.02067 | 1.7523  | 0.809246 | 1.7523  |
| Lpin2         | NM_001164885 | 0.001147 | 8.30642 | 8.01734 | 7.20871 | 1.75154 | 0.808626 | 1.75154 |
| Inpp5k        | NM_008916    | 0.001742 | 7.44087 | 9.23007 | 8.42193 | 1.75096 | 0.808143 | 1.75096 |
| Mrps26        | NM_207207    | 0.00208  | 7.09897 | 8.45181 | 7.64381 | 1.75077 | 0.807992 | 1.75077 |
| Fam190a       | NM_183310    | 0.001852 | 7.32096 | 5.43687 | 4.62891 | 1.75073 | 0.807955 | 1.75073 |
| Snord104      | NR_030703    | 0.004877 | 5.63633 | 9.11389 | 8.30601 | 1.75065 | 0.807887 | 1.75065 |
| Fam178a       | BC060679     | 0.006444 | 5.21636 | 8.67102 | 7.86361 | 1.75007 | 0.807414 | 1.75007 |
| 2210009G21Rik | NM_001038641 | 0.003276 | 6.28341 | 6.35095 | 5.54356 | 1.75004 | 0.80739  | 1.75004 |
| Vsig10        | NM_001033311 | 3.56E-05 | 20.1786 | 6.35364 | 5.54649 | 1.74975 | 0.80715  | 1.74975 |
| Zfyve27       | NM_177319    | 0.000198 | 13.0642 | 8.23724 | 7.43106 | 1.74857 | 0.806178 | 1.74857 |

|               |              |          |         |         |         |         |          |         |
|---------------|--------------|----------|---------|---------|---------|---------|----------|---------|
| Ddx56         | NM_026538    | 0.001062 | 8.4768  | 8.86081 | 8.05463 | 1.74857 | 0.806175 | 1.74857 |
| Sorbs3        | NM_011366    | 1.87E-05 | 23.7442 | 7.44888 | 6.64422 | 1.74673 | 0.80466  | 1.74673 |
|               | ---          | 0.000609 | 9.79591 | 5.38618 | 4.58206 | 1.74608 | 0.80412  | 1.74608 |
| Polr2b        | NM_153798    | 0.000207 | 12.9179 | 10.3616 | 9.55756 | 1.74602 | 0.804072 | 1.74602 |
| Slc25a35      | NM_028048    | 0.00205  | 7.12634 | 5.40034 | 4.59639 | 1.74588 | 0.803952 | 1.74588 |
|               | ---          | 0.002757 | 6.58299 | 9.29402 | 8.49012 | 1.74581 | 0.8039   | 1.74581 |
| Atg2a         | NM_194348    | 0.000235 | 12.502  | 7.79693 | 6.99324 | 1.74556 | 0.803686 | 1.74556 |
| Mynn          | NM_030557    | 0.006169 | 5.28035 | 7.96459 | 7.16119 | 1.74521 | 0.803399 | 1.74521 |
| Ubxn8         | NM_178648    | 0.004166 | 5.88559 | 7.4006  | 6.59731 | 1.74508 | 0.803289 | 1.74508 |
| Pold2         | NM_008894    | 0.004913 | 5.62466 | 8.09179 | 7.28864 | 1.7449  | 0.803146 | 1.7449  |
| Btrc          | NM_001037758 | 1.69E-05 | 24.3565 | 8.54643 | 7.74374 | 1.74434 | 0.802682 | 1.74434 |
| Mms19         | NM_028152    | 0.000293 | 11.8243 | 8.597   | 7.79458 | 1.74402 | 0.802419 | 1.74402 |
| Tpi1          | NM_009415    | 0.000523 | 10.1889 | 12.0689 | 11.2669 | 1.74352 | 0.802004 | 1.74352 |
| Nfat5         | NM_133957    | 0.003454 | 6.19398 | 9.04683 | 8.24511 | 1.74318 | 0.801722 | 1.74318 |
| Nav2          | NM_175272    | 0.000139 | 14.287  | 6.0419  | 5.24041 | 1.7429  | 0.801489 | 1.7429  |
| Gm1943        | NR_002928    | 0.002839 | 6.53103 | 9.53242 | 8.73122 | 1.74255 | 0.801197 | 1.74255 |
| Fam160a2      | NM_199009    | 0.000308 | 11.6678 | 7.73338 | 6.93226 | 1.74245 | 0.801121 | 1.74245 |
| Rab3gap1      | NM_178690    | 0.000184 | 13.3044 | 9.10387 | 8.30328 | 1.74181 | 0.800587 | 1.74181 |
| Pdik1l        | NM_146156    | 0.000174 | 13.5129 | 6.79518 | 5.99477 | 1.7416  | 0.800412 | 1.7416  |
| 2310016M24Rik | NM_183256    | 0.000728 | 9.35187 | 8.64418 | 7.84507 | 1.74002 | 0.799104 | 1.74002 |
| Dhh           | NM_007857    | 0.000271 | 12.0608 | 5.63497 | 4.83592 | 1.73996 | 0.79905  | 1.73996 |
| Comt1         | NM_001111062 | 0.000757 | 9.257   | 9.04869 | 8.2498  | 1.73976 | 0.798887 | 1.73976 |
| Snrnp200      | NM_177214    | 0.000195 | 13.1126 | 9.75365 | 8.95492 | 1.73957 | 0.798728 | 1.73957 |
| Tmx2          | NM_025868    | 0.002326 | 6.89015 | 9.91502 | 9.11672 | 1.73905 | 0.798302 | 1.73905 |
| Lin7c         | NM_011699    | 0.001398 | 7.88676 | 9.62258 | 8.82449 | 1.7388  | 0.798091 | 1.7388  |
| Alg10b        | NM_001033441 | 0.000428 | 10.7261 | 9.83836 | 9.04041 | 1.73862 | 0.797944 | 1.73862 |
|               | ---          | 0.0034   | 6.22043 | 7.75628 | 6.95928 | 1.73748 | 0.796995 | 1.73748 |
| Dnajc10       | NM_024181    | 0.003217 | 6.31436 | 10.4035 | 9.6066  | 1.73733 | 0.796872 | 1.73733 |
| Clcn6         | NM_011929    | 0.000488 | 10.3733 | 7.56889 | 6.77211 | 1.73722 | 0.796783 | 1.73722 |
| Ndr3          | NM_180956    | 0.001435 | 7.83211 | 9.29241 | 8.4958  | 1.73701 | 0.796602 | 1.73701 |
| Prkcdpb       | NM_028444    | 0.000184 | 13.3059 | 10.3677 | 9.5712  | 1.73686 | 0.796486 | 1.73686 |

|               |              |          |         |         |         |         |          |         |
|---------------|--------------|----------|---------|---------|---------|---------|----------|---------|
| Brf2          | NM_025686    | 0.006754 | 5.1479  | 6.56509 | 5.76948 | 1.7358  | 0.795604 | 1.7358  |
| Slc25a33      | NM_027460    | 0.000848 | 8.98727 | 5.53307 | 4.73752 | 1.73574 | 0.795551 | 1.73574 |
| Lrch4         | NM_146164    | 0.006072 | 5.30362 | 6.92061 | 6.12567 | 1.73501 | 0.794942 | 1.73501 |
| Trem2         | NM_031254    | 0.000642 | 9.66113 | 6.73366 | 5.93878 | 1.73493 | 0.794878 | 1.73493 |
| Tmem231       | NM_001033321 | 0.001346 | 7.96507 | 8.02477 | 7.22995 | 1.73485 | 0.794815 | 1.73485 |
| Crnkl1        | NM_025820    | 6.21E-05 | 17.537  | 8.42207 | 7.62827 | 1.73364 | 0.793805 | 1.73364 |
| Ccdc102a      | NM_001033533 | 0.001627 | 7.57663 | 7.68101 | 6.88725 | 1.73358 | 0.79375  | 1.73358 |
| Speg          | NM_007463    | 0.003195 | 6.32622 | 6.64253 | 5.84914 | 1.73315 | 0.793393 | 1.73315 |
| Cep78         | NM_198019    | 0.004619 | 5.72116 | 6.67296 | 5.8798  | 1.73287 | 0.79316  | 1.73287 |
| 2310008H09Rik | NM_023197    | 7.29E-05 | 16.8397 | 7.28089 | 6.48786 | 1.73271 | 0.793032 | 1.73271 |
| Blvra         | NM_026678    | 6.44E-05 | 17.3736 | 8.74448 | 7.95147 | 1.73268 | 0.793006 | 1.73268 |
| Dcaf15        | NM_172502    | 0.000658 | 9.60147 | 6.80246 | 6.01001 | 1.73201 | 0.792451 | 1.73201 |
| Psme4         | NM_134013    | 5.20E-05 | 18.3376 | 9.38636 | 8.59432 | 1.73152 | 0.792042 | 1.73152 |
| Azin1         | NM_001102458 | 0.006561 | 5.19004 | 10.2748 | 9.48327 | 1.73086 | 0.79149  | 1.73086 |
| Srp68         | NM_146032    | 0.000874 | 8.91721 | 10.309  | 9.51803 | 1.7302  | 0.790935 | 1.7302  |
| Poldip3       | NM_178627    | 0.000703 | 9.43609 | 10.539  | 9.7485  | 1.72968 | 0.790504 | 1.72968 |
| Uba3          | NM_011666    | 0.005561 | 5.43499 | 10.3545 | 9.56414 | 1.72953 | 0.790377 | 1.72953 |
| Cyp39a1       | NM_018887    | 0.0003   | 11.7466 | 6.77909 | 5.9888  | 1.72943 | 0.790297 | 1.72943 |
| Zfml          | NM_008717    | 0.005684 | 5.40205 | 9.04032 | 8.25043 | 1.72895 | 0.789895 | 1.72895 |
| Stip1         | NM_016737    | 0.001011 | 8.586   | 9.95018 | 9.16062 | 1.72855 | 0.789561 | 1.72855 |
| Gcdh          | NM_008097    | 0.001337 | 7.97886 | 8.15865 | 7.36921 | 1.7284  | 0.789438 | 1.7284  |
| 2310043J07Rik | NM_027158    | 0.005984 | 5.32532 | 5.66321 | 4.87383 | 1.72833 | 0.789381 | 1.72833 |
| Zc3h6         | NM_178404    | 0.004902 | 5.62829 | 6.67482 | 5.88548 | 1.72829 | 0.789343 | 1.72829 |
| Tmx2          | NM_025868    | 0.001797 | 7.37988 | 9.93069 | 9.14145 | 1.72816 | 0.789236 | 1.72816 |
| Pgam1         | NM_023418    | 0.004852 | 5.64414 | 10.6388 | 9.84966 | 1.728   | 0.789107 | 1.728   |
| Pgam1         | NM_023418    | 0.004852 | 5.64414 | 10.6388 | 9.84966 | 1.728   | 0.789107 | 1.728   |
| Hs3st3a1      | NM_178870    | 0.001895 | 7.27646 | 5.74223 | 4.95346 | 1.7276  | 0.788768 | 1.7276  |
| Immp2l        | NM_053122    | 0.006138 | 5.28766 | 5.51916 | 4.73076 | 1.72716 | 0.788398 | 1.72716 |
| Zfp710        | NM_175433    | 0.002049 | 7.12732 | 6.2026  | 5.41444 | 1.72688 | 0.788165 | 1.72688 |
| Peo1          | NM_153796    | 0.001077 | 8.44513 | 8.01346 | 7.22552 | 1.72661 | 0.787939 | 1.72661 |
| Prpf38b       | NM_025845    | 4.94E-05 | 18.578  | 9.48226 | 8.69527 | 1.72546 | 0.786982 | 1.72546 |

|               |                   |          |         |         |         |         |          |         |
|---------------|-------------------|----------|---------|---------|---------|---------|----------|---------|
| Cnst          | NM_146105         | 0.000491 | 10.3541 | 6.8622  | 6.07545 | 1.72518 | 0.786745 | 1.72518 |
| Far1          | NM_026143         | 8.64E-05 | 16.1307 | 9.44169 | 8.65509 | 1.725   | 0.7866   | 1.725   |
| Imp4          | NM_178601         | 0.000261 | 12.1751 | 8.55741 | 7.7715  | 1.72419 | 0.785915 | 1.72419 |
| Chd7          | NM_001081417      | 0.001259 | 8.10585 | 5.94477 | 5.15895 | 1.72407 | 0.785818 | 1.72407 |
|               | ---               | 0.001926 | 7.24527 | 8.82831 | 8.04258 | 1.72396 | 0.785724 | 1.72396 |
| Fbf1          | NM_172571         | 0.005279 | 5.51428 | 7.3249  | 6.53929 | 1.72383 | 0.785617 | 1.72383 |
| Tmod3         | NM_016963         | 0.002049 | 7.12732 | 9.98013 | 9.19482 | 1.72346 | 0.785308 | 1.72346 |
| Rhot2         | NM_145999         | 0.001251 | 8.12056 | 6.97376 | 6.18994 | 1.72168 | 0.783818 | 1.72168 |
| Fam69a        | NM_026062         | 0.003337 | 6.25216 | 9.25368 | 8.46996 | 1.72156 | 0.783718 | 1.72156 |
| 0610007P22Rik | NM_026676         | 0.001017 | 8.57312 | 9.15707 | 8.37394 | 1.72086 | 0.783126 | 1.72086 |
| Stxbp3a       | NM_011504         | 0.003314 | 6.2637  | 9.1129  | 8.32998 | 1.72061 | 0.782916 | 1.72061 |
| Hs6st1        | NM_015818         | 0.007064 | 5.08341 | 8.14101 | 7.35922 | 1.71926 | 0.781789 | 1.71926 |
| Med13         | NM_001080931      | 0.001397 | 7.88792 | 9.55229 | 8.77092 | 1.71877 | 0.781375 | 1.71877 |
|               | ENSMUST0000010141 |          |         |         |         |         |          |         |
| Tra2a         | 7                 | 0.002637 | 6.66241 | 8.5504  | 7.76914 | 1.71863 | 0.781262 | 1.71863 |
| Cog1          | NM_013581         | 0.001704 | 7.48481 | 7.88973 | 7.10865 | 1.71842 | 0.78108  | 1.71842 |
| Dip2b         | NM_001159361      | 0.004881 | 5.63506 | 8.2642  | 7.48354 | 1.71792 | 0.780666 | 1.71792 |
| Zfp207        | NM_001130169      | 0.000546 | 10.074  | 9.42922 | 8.64918 | 1.71719 | 0.780046 | 1.71719 |
| Hus1          | NM_008316         | 0.006149 | 5.28517 | 7.00684 | 6.22742 | 1.71645 | 0.779424 | 1.71645 |
| Gm6194        | NR_033512         | 0.004643 | 5.71306 | 6.58364 | 5.8043  | 1.71635 | 0.779342 | 1.71635 |
| 2410089E03Rik | NM_001162906      | 0.00315  | 6.3508  | 7.65749 | 6.87846 | 1.71598 | 0.779031 | 1.71598 |
| Srsf2ip       | NM_028148         | 0.000543 | 10.0893 | 9.54876 | 8.76978 | 1.71591 | 0.778976 | 1.71591 |
| 1810013D10Rik | NM_001145433      | 0.001315 | 8.01378 | 7.07455 | 6.29581 | 1.71563 | 0.778739 | 1.71563 |
| Otud7b        | NM_001025613      | 0.000251 | 12.2965 | 8.07145 | 7.29281 | 1.71551 | 0.77864  | 1.71551 |
|               | ---               | 0.00395  | 5.97179 | 9.12879 | 8.35034 | 1.71529 | 0.778454 | 1.71529 |
|               | ---               | 0.003095 | 6.38063 | 9.61054 | 8.83232 | 1.71502 | 0.778228 | 1.71502 |
|               | ---               | 0.001574 | 7.64381 | 9.04464 | 8.26688 | 1.71448 | 0.777768 | 1.71448 |
| Ltv1          | NM_181470         | 0.005816 | 5.36774 | 7.94617 | 7.16866 | 1.71416 | 0.777501 | 1.71416 |
| Decr2         | NM_011933         | 0.000548 | 10.0634 | 9.51361 | 8.73687 | 1.71325 | 0.776739 | 1.71325 |
| Puf60         | NM_028364         | 0.000182 | 13.3442 | 10.6622 | 9.8855  | 1.71322 | 0.776709 | 1.71322 |
| Kptn          | NM_133727         | 0.002459 | 6.78847 | 6.92125 | 6.14454 | 1.71321 | 0.776705 | 1.71321 |

|               |              |          |         |         |         |         |          |         |
|---------------|--------------|----------|---------|---------|---------|---------|----------|---------|
| Tspan17       | NM_028841    | 0.000989 | 8.63428 | 7.40572 | 6.62915 | 1.71305 | 0.776567 | 1.71305 |
| Retsat        | NM_026159    | 0.000441 | 10.6432 | 7.96577 | 7.18958 | 1.71261 | 0.776197 | 1.71261 |
| Arhgap23      | NM_021493    | 0.001643 | 7.55706 | 8.11408 | 7.33813 | 1.71232 | 0.775953 | 1.71232 |
| Rhot1         | NM_001163354 | 0.000665 | 9.57367 | 8.65754 | 7.88197 | 1.71186 | 0.775564 | 1.71186 |
| Nucks1        | NM_175294    | 0.003012 | 6.4279  | 9.73166 | 8.95676 | 1.71107 | 0.774899 | 1.71107 |
| Cdipt         | NM_026638    | 0.000603 | 9.82056 | 9.60953 | 8.83475 | 1.71092 | 0.774776 | 1.71092 |
| Atf2          | NM_019717    | 0.000427 | 10.7366 | 9.26663 | 8.49208 | 1.71066 | 0.774553 | 1.71066 |
| Tmem183a      | NM_020588    | 0.000925 | 8.78809 | 8.31643 | 7.54196 | 1.71057 | 0.774477 | 1.71057 |
| Slc25a32      | NM_172402    | 0.00025  | 12.3174 | 8.93733 | 8.16359 | 1.7097  | 0.773743 | 1.7097  |
| Ccdc61        | NM_001033314 | 2.18E-06 | 40.6698 | 6.70147 | 5.92778 | 1.70964 | 0.773695 | 1.70964 |
| Taok1         | NM_144825    | 0.000347 | 11.3235 | 9.20717 | 8.43375 | 1.70932 | 0.773419 | 1.70932 |
| Gm14326       | NM_001190302 | 0.000913 | 8.81604 | 9.72564 | 8.9532  | 1.70816 | 0.772439 | 1.70816 |
| Ywhae         | NM_009536    | 8.02E-05 | 16.438  | 10.7908 | 10.0185 | 1.70789 | 0.772213 | 1.70789 |
| Mrpl9         | NM_030116    | 0.005066 | 5.57737 | 8.12807 | 7.35588 | 1.70786 | 0.772188 | 1.70786 |
| Smarcal1      | NM_018817    | 0.006082 | 5.30137 | 8.18712 | 7.41541 | 1.7073  | 0.771718 | 1.7073  |
| Smyd5         | NM_144918    | 0.005393 | 5.48156 | 8.09009 | 7.31868 | 1.70693 | 0.771404 | 1.70693 |
| Jmjd4         | NM_178659    | 0.000996 | 8.61828 | 6.9348  | 6.16365 | 1.70662 | 0.771142 | 1.70662 |
|               | ---          | 0.006773 | 5.14394 | 8.04079 | 7.27094 | 1.70509 | 0.76985  | 1.70509 |
| Wbscr27       | NM_024479    | 0.006151 | 5.28467 | 7.1516  | 6.38275 | 1.70391 | 0.768847 | 1.70391 |
|               | ---          | 0.005712 | 5.39482 | 10.0611 | 9.29267 | 1.7034  | 0.768413 | 1.7034  |
| Ktn1          | NM_008477    | 0.000557 | 10.0236 | 8.46897 | 7.70063 | 1.7033  | 0.768336 | 1.7033  |
| Ube2z         | NM_172300    | 6.31E-05 | 17.4633 | 9.23053 | 8.46239 | 1.70307 | 0.768139 | 1.70307 |
| Zbtb7c        | NM_145356    | 0.003702 | 6.07835 | 6.72786 | 5.96012 | 1.70259 | 0.767734 | 1.70259 |
| Zc3h3         | NM_172121    | 2.34E-05 | 22.4197 | 7.10811 | 6.34044 | 1.70253 | 0.767677 | 1.70253 |
|               | ---          | 0.003488 | 6.17763 | 10.5479 | 9.78032 | 1.70244 | 0.767603 | 1.70244 |
| 1200014J11Rik | NM_025818    | 0.001078 | 8.44266 | 8.75552 | 7.98796 | 1.7024  | 0.767568 | 1.7024  |
| Rhbdf1        | NM_010117    | 0.001393 | 7.89338 | 8.61962 | 7.85242 | 1.70196 | 0.767197 | 1.70196 |
| Lactb         | NM_030717    | 0.005974 | 5.32773 | 6.56581 | 5.79903 | 1.70148 | 0.766789 | 1.70148 |
| Sucg1         | NM_019879    | 0.003437 | 6.20236 | 8.97167 | 8.20504 | 1.70129 | 0.76663  | 1.70129 |
| Skil          | NM_011386    | 0.003735 | 6.06387 | 9.67864 | 8.91317 | 1.69992 | 0.76547  | 1.69992 |
| 1110002N22Rik | NM_183275    | 0.001565 | 7.65445 | 6.20469 | 5.43926 | 1.69987 | 0.765426 | 1.69987 |

|               |              |          |         |         |         |         |          |         |
|---------------|--------------|----------|---------|---------|---------|---------|----------|---------|
| Tmem116       | NM_001161627 | 0.000487 | 10.3779 | 5.28741 | 4.52204 | 1.69981 | 0.765371 | 1.69981 |
| Camta1        | NM_001081557 | 0.000541 | 10.0989 | 4.93717 | 4.17239 | 1.69911 | 0.764782 | 1.69911 |
| Arhgef19      | NM_172520    | 0.00217  | 7.019   | 6.45272 | 5.68832 | 1.69866 | 0.764396 | 1.69866 |
| Ppp1ca        | NM_031868    | 0.000204 | 12.9753 | 10.8599 | 10.0967 | 1.69725 | 0.763201 | 1.69725 |
| C1rl          | NM_181344    | 0.003128 | 6.36286 | 7.50487 | 6.74182 | 1.69708 | 0.763051 | 1.69708 |
| Ap2a1         | NM_007458    | 0.000455 | 10.5592 | 8.85331 | 8.09045 | 1.69685 | 0.762861 | 1.69685 |
| Rfc3          | NM_027009    | 0.003516 | 6.16395 | 7.07809 | 6.31528 | 1.69679 | 0.762809 | 1.69679 |
| Traf3ip1      | NM_028718    | 0.002785 | 6.56496 | 6.92709 | 6.16444 | 1.69661 | 0.762656 | 1.69661 |
| Arhgef18      | NM_133962    | 0.000714 | 9.39897 | 7.71018 | 6.94772 | 1.69638 | 0.762461 | 1.69638 |
| Ncaph2        | NM_001115132 | 4.38E-05 | 19.1512 | 9.0739  | 8.3116  | 1.6962  | 0.762302 | 1.6962  |
| 2310044H10Rik | NM_197991    | 0.002589 | 6.69505 | 9.08735 | 8.32511 | 1.69612 | 0.762237 | 1.69612 |
| Sars2         | NM_023637    | 0.001062 | 8.47531 | 6.545   | 5.78295 | 1.6959  | 0.76205  | 1.6959  |
| Dgat1         | NM_010046    | 0.005641 | 5.41364 | 8.4704  | 7.70896 | 1.69519 | 0.761448 | 1.69519 |
| Agpat3        | NM_053014    | 0.003133 | 6.35991 | 8.18048 | 7.4191  | 1.69512 | 0.761388 | 1.69512 |
| Smg6          | NM_001002764 | 0.005217 | 5.53224 | 8.83533 | 8.07405 | 1.69499 | 0.76128  | 1.69499 |
| Smarb1        | NM_011418    | 3.02E-05 | 21.0411 | 9.79743 | 9.03688 | 1.69414 | 0.760549 | 1.69414 |
|               | ---          | 0.000219 | 12.7408 | 11.15   | 10.3895 | 1.69409 | 0.760512 | 1.69409 |
| Ahsa2         | NM_172391    | 0.001025 | 8.55582 | 9.19597 | 8.43677 | 1.69255 | 0.759196 | 1.69255 |
| Gatsl3        | NM_028022    | 0.003453 | 6.19449 | 7.62404 | 6.86537 | 1.69193 | 0.758666 | 1.69193 |
| Rock2         | NM_009072    | 0.001464 | 7.7903  | 9.12793 | 8.36945 | 1.69171 | 0.758486 | 1.69171 |
| Arhgef2       | NM_008487    | 0.002225 | 6.97207 | 9.32022 | 8.56221 | 1.69117 | 0.758019 | 1.69117 |
| Ddx27         | NM_153065    | 0.001192 | 8.22355 | 8.59318 | 7.83519 | 1.69113 | 0.757989 | 1.69113 |
| Ppp6r1        | NM_172894    | 0.001449 | 7.81191 | 8.72893 | 7.97115 | 1.69089 | 0.757783 | 1.69089 |
| Trmt6         | NM_175113    | 0.002796 | 6.55845 | 6.98312 | 6.2257  | 1.69046 | 0.75742  | 1.69046 |
| Rbm16         | NM_134123    | 0.000679 | 9.52398 | 8.74144 | 7.98424 | 1.69021 | 0.757201 | 1.69021 |
|               | ---          | 0.002014 | 7.1601  | 10.4459 | 9.68905 | 1.68981 | 0.756859 | 1.68981 |
| Ing3          | NM_023626    | 0.005482 | 5.45688 | 7.63256 | 6.87583 | 1.68965 | 0.756723 | 1.68965 |
| Camkk1        | NM_018883    | 0.00356  | 6.14358 | 6.55449 | 5.79922 | 1.68795 | 0.755274 | 1.68795 |
| Exosc1        | NM_025644    | 0.000158 | 13.8386 | 9.53242 | 8.77762 | 1.68739 | 0.754797 | 1.68739 |
|               | ---          | 1.35E-05 | 25.7375 | 10.8188 | 10.064  | 1.68734 | 0.754749 | 1.68734 |
| Pop4          | NM_025390    | 0.000204 | 12.9668 | 7.35845 | 6.6038  | 1.68723 | 0.754653 | 1.68723 |

|          |              |          |         |         |         |         |          |         |
|----------|--------------|----------|---------|---------|---------|---------|----------|---------|
| Ufsp1    | NM_027356    | 0.002761 | 6.58042 | 6.11084 | 5.35623 | 1.68717 | 0.754607 | 1.68717 |
| Mknk2    | NM_021462    | 0.002157 | 7.03053 | 8.49638 | 7.74194 | 1.68698 | 0.75444  | 1.68698 |
| Fam38b   | NM_001039485 | 0.000699 | 9.4511  | 6.4491  | 5.69494 | 1.68665 | 0.75416  | 1.68665 |
| 5-Mar    | NM_027314    | 0.001325 | 7.99876 | 9.69309 | 8.93902 | 1.68654 | 0.754068 | 1.68654 |
| Gnao1    | NM_010308    | 0.004983 | 5.6029  | 7.24666 | 6.49331 | 1.68571 | 0.753355 | 1.68571 |
| Eif3c    | NM_146200    | 0.000197 | 13.0857 | 10.728  | 9.97483 | 1.68554 | 0.75321  | 1.68554 |
| Ap3s2    | NM_009682    | 0.001963 | 7.20846 | 6.85334 | 6.10215 | 1.68317 | 0.751184 | 1.68317 |
| Plekhb2  | NM_145516    | 0.002956 | 6.4608  | 9.16246 | 8.41132 | 1.68313 | 0.751147 | 1.68313 |
| Tmem161b | NM_175187    | 0.001803 | 7.3735  | 7.59431 | 6.8433  | 1.68297 | 0.75101  | 1.68297 |
| Atp13a3  | NM_001128096 | 0.00017  | 13.5942 | 9.5975  | 8.84688 | 1.68252 | 0.750621 | 1.68252 |
| Rabgga   | NM_019519    | 0.000902 | 8.84465 | 7.46497 | 6.71552 | 1.68115 | 0.749453 | 1.68115 |
| Mtmr3    | NM_028860    | 0.00048  | 10.416  | 9.21437 | 8.46517 | 1.68087 | 0.749204 | 1.68087 |
| Narfl    | NM_026238    | 0.001126 | 8.34731 | 7.19153 | 6.44245 | 1.68072 | 0.749081 | 1.68072 |
|          | ---          | 0.006363 | 5.23475 | 7.3938  | 6.64478 | 1.68065 | 0.749019 | 1.68065 |
| Ccndbp1  | NM_010761    | 0.001243 | 8.13418 | 7.99758 | 7.24888 | 1.68028 | 0.748698 | 1.68028 |
| Zc3h7b   | NM_001081016 | 0.001478 | 7.7709  | 8.20057 | 7.45189 | 1.68026 | 0.748683 | 1.68026 |
| Rrm2b    | NM_199476    | 0.005509 | 5.44929 | 7.79656 | 7.04818 | 1.67991 | 0.748382 | 1.67991 |
| Zfp329   | NM_026046    | 0.00348  | 6.18152 | 7.12353 | 6.3754  | 1.67962 | 0.748135 | 1.67962 |
| Ddx18    | NM_025860    | 0.000331 | 11.4599 | 10.0755 | 9.32783 | 1.6791  | 0.747688 | 1.6791  |
| Rhd      | NM_011270    | 0.006346 | 5.2387  | 4.97822 | 4.2319  | 1.6775  | 0.746314 | 1.6775  |
| Psmf1    | NM_212446    | 0.000654 | 9.61481 | 8.24308 | 7.49728 | 1.67691 | 0.745806 | 1.67691 |
| Map3k11  | NM_022012    | 0.000337 | 11.4039 | 7.47031 | 6.72509 | 1.67623 | 0.745223 | 1.67623 |
| Ppil4    | NM_026141    | 0.000239 | 12.4514 | 8.7367  | 7.99154 | 1.67616 | 0.745156 | 1.67616 |
| Chd7     | NM_001081417 | 0.004374 | 5.80751 | 5.05444 | 4.30953 | 1.67587 | 0.744912 | 1.67587 |
| Stxbp2   | NM_011503    | 0.000599 | 9.83871 | 7.83108 | 7.08628 | 1.67574 | 0.7448   | 1.67574 |
| Mov10    | NM_001163440 | 0.002692 | 6.62535 | 8.06138 | 7.31729 | 1.67491 | 0.744087 | 1.67491 |
| Mark2    | NM_007928    | 0.000517 | 10.2162 | 7.91516 | 7.17118 | 1.67479 | 0.743976 | 1.67479 |
| Dok1     | NM_010070    | 9.82E-05 | 15.617  | 8.90765 | 8.16387 | 1.67456 | 0.743783 | 1.67456 |
| Nop10    | NM_025403    | 0.001647 | 7.55292 | 9.44733 | 8.70376 | 1.67432 | 0.743576 | 1.67432 |
| Lmf1     | NM_029624    | 0.005685 | 5.40192 | 8.76449 | 8.02098 | 1.67425 | 0.743514 | 1.67425 |
|          | ---          | 0.001153 | 8.2954  | 8.76534 | 8.02215 | 1.67387 | 0.743188 | 1.67387 |



|               |              |          |         |         |         |         |          |         |
|---------------|--------------|----------|---------|---------|---------|---------|----------|---------|
| 4930528A17Rik | NR_028384    | 0.001242 | 8.135   | 5.03876 | 4.29607 | 1.67329 | 0.742685 | 1.67329 |
| Il17rc        | NM_134159    | 0.00306  | 6.40028 | 8.65037 | 7.908   | 1.67292 | 0.742365 | 1.67292 |
| E330009J07Rik | NM_175528    | 0.000169 | 13.6069 | 6.47978 | 5.7375  | 1.67282 | 0.742285 | 1.67282 |
| Btaf1         | NM_001080706 | 0.00149  | 7.75536 | 9.10226 | 8.3601  | 1.67269 | 0.742166 | 1.67269 |
| Axin1         | NM_009733    | 0.000659 | 9.59799 | 7.4141  | 6.67209 | 1.6725  | 0.742004 | 1.6725  |
| Ctnna1        | NM_009818    | 0.000121 | 14.8124 | 10.4559 | 9.7142  | 1.67212 | 0.741677 | 1.67212 |
| Rtn1          | NM_153457    | 0.003406 | 6.21762 | 5.80944 | 5.06786 | 1.672   | 0.741575 | 1.672   |
| Bop1          | NM_013481    | 0.000333 | 11.4432 | 8.92441 | 8.18314 | 1.67165 | 0.741277 | 1.67165 |
| 4922501C03Rik | NM_199316    | 0.000509 | 10.2595 | 6.11171 | 5.37053 | 1.67155 | 0.741187 | 1.67155 |
| Rtcd1         | NM_025517    | 0.003083 | 6.38741 | 8.84354 | 8.10249 | 1.67139 | 0.74105  | 1.67139 |
| Snord16a      | NR_028548    | 0.000575 | 9.94013 | 9.61994 | 8.87913 | 1.67112 | 0.740813 | 1.67112 |
| Med31         | NM_026068    | 0.00188  | 7.29207 | 8.0204  | 7.27961 | 1.67109 | 0.740787 | 1.67109 |
| Katnal2       | NM_027721    | 0.000108 | 15.2429 | 4.94832 | 4.20773 | 1.67087 | 0.740596 | 1.67087 |
| Agfg2         | NM_178162    | 0.001061 | 8.47844 | 7.75019 | 7.00998 | 1.67042 | 0.740213 | 1.67042 |
| Prkag1        | NM_016781    | 0.00157  | 7.64856 | 10.3421 | 9.602   | 1.67026 | 0.740076 | 1.67026 |
| Luc7l3        | NM_026313    | 0.000567 | 9.97734 | 10.1314 | 9.39175 | 1.66973 | 0.739617 | 1.66973 |
| Zswim1        | NM_028028    | 0.00278  | 6.56815 | 6.52588 | 5.78701 | 1.66887 | 0.738869 | 1.66887 |
| Rictor        | NM_030168    | 0.001533 | 7.69682 | 9.13222 | 8.39346 | 1.66875 | 0.738765 | 1.66875 |
| Zfyve20       | NM_030081    | 0.004445 | 5.78195 | 8.27345 | 7.53488 | 1.66853 | 0.738575 | 1.66853 |
| Sez6l2        | NM_144926    | 0.000555 | 10.0344 | 5.34558 | 4.60709 | 1.66844 | 0.738497 | 1.66844 |
| Prmt10        | NM_001081240 | 0.004212 | 5.86803 | 8.01151 | 7.27392 | 1.66738 | 0.737583 | 1.66738 |
| Exosc2        | NM_144886    | 0.003348 | 6.24683 | 8.11549 | 7.37855 | 1.66664 | 0.736939 | 1.66664 |
| Shprh         | NM_172937    | 0.000838 | 9.01589 | 8.17244 | 7.43614 | 1.6659  | 0.736302 | 1.6659  |
| Lrrc14b       | NM_001033042 | 0.000101 | 15.5233 | 6.06418 | 5.3281  | 1.66563 | 0.736071 | 1.66563 |
| Larp4         | NM_001024526 | 0.001326 | 7.99589 | 6.99842 | 6.26249 | 1.66548 | 0.735938 | 1.66548 |
| Xab2          | NM_026156    | 2.17E-05 | 22.8511 | 8.74687 | 8.01102 | 1.66538 | 0.735852 | 1.66538 |
| Frmd8         | NM_026169    | 0.001298 | 8.04204 | 7.82082 | 7.08521 | 1.66511 | 0.735617 | 1.66511 |
| Adam10        | NM_007399    | 0.000427 | 10.7352 | 10.4102 | 9.67476 | 1.66496 | 0.73549  | 1.66496 |
| Sqrdl         | NM_021507    | 0.004945 | 5.6147  | 8.15598 | 7.42116 | 1.66419 | 0.73482  | 1.66419 |
| Mis12         | NM_025993    | 0.002442 | 6.80124 | 8.04176 | 7.3071  | 1.66401 | 0.734661 | 1.66401 |
| Ranbp6        | NM_177721    | 0.001811 | 7.36512 | 8.02529 | 7.29109 | 1.66348 | 0.734202 | 1.66348 |

|          |              |          |         |         |         |         |          |         |
|----------|--------------|----------|---------|---------|---------|---------|----------|---------|
| Rg9mtd3  | NM_027266    | 0.001473 | 7.77897 | 6.93391 | 6.20038 | 1.6627  | 0.733529 | 1.6627  |
| Kcmf1    | NM_019715    | 0.001685 | 7.50734 | 10.1165 | 9.3834  | 1.66225 | 0.733138 | 1.66225 |
| Bcar1    | NM_009954    | 0.003794 | 6.03794 | 7.58017 | 6.84743 | 1.66179 | 0.732738 | 1.66179 |
| Dnajc7   | NM_019795    | 0.002178 | 7.01177 | 9.77187 | 9.03915 | 1.66177 | 0.732721 | 1.66177 |
| Cacna1b  | NM_001042528 | 0.003979 | 5.95998 | 5.66053 | 4.92818 | 1.66134 | 0.732349 | 1.66134 |
| Fmnl2    | NM_172409    | 0.000376 | 11.0891 | 8.35412 | 7.62181 | 1.6613  | 0.732314 | 1.6613  |
| Kpnb1    | NM_008379    | 0.000472 | 10.4612 | 10.2651 | 9.53308 | 1.66101 | 0.732062 | 1.66101 |
|          | ---          | 0.00681  | 5.13595 | 9.78201 | 9.05021 | 1.66071 | 0.731805 | 1.66071 |
| Sepx1    | NM_013759    | 0.002457 | 6.78971 | 8.93859 | 8.20742 | 1.65998 | 0.731162 | 1.65998 |
| Prpsap1  | NM_026364    | 0.000622 | 9.74096 | 9.54569 | 8.81466 | 1.65981 | 0.731022 | 1.65981 |
| Cyc1     | NM_025567    | 0.003106 | 6.37491 | 9.97057 | 9.23973 | 1.65961 | 0.730844 | 1.65961 |
| Slc12a6  | NM_133649    | 0.002503 | 6.75621 | 8.18129 | 7.45062 | 1.65941 | 0.730671 | 1.65941 |
| Srpk2    | NM_009274    | 0.006299 | 5.24953 | 9.31769 | 8.58736 | 1.65901 | 0.730323 | 1.65901 |
| Nfatc2ip | NM_010900    | 0.005821 | 5.36648 | 6.56822 | 5.83821 | 1.65865 | 0.730007 | 1.65865 |
| Rnf135   | NM_028019    | 0.002759 | 6.5817  | 6.75289 | 6.02296 | 1.65856 | 0.729929 | 1.65856 |
| Usp37    | NM_176972    | 0.000226 | 12.6294 | 6.93729 | 6.20834 | 1.65744 | 0.728956 | 1.65744 |
| Asb8     | NM_001170711 | 0.001796 | 7.38108 | 8.83323 | 8.10434 | 1.65736 | 0.728888 | 1.65736 |
| Psm11    | NM_178616    | 1.06E-06 | 48.7977 | 10.0744 | 9.346   | 1.65675 | 0.728353 | 1.65675 |
| Mrps7    | NM_025305    | 0.000531 | 10.1469 | 8.75718 | 8.02912 | 1.65642 | 0.728065 | 1.65642 |
| Anapc1   | NM_008569    | 0.001289 | 8.05669 | 10.0058 | 9.27772 | 1.65639 | 0.72804  | 1.65639 |
| Tmem93   | NM_025318    | 0.001025 | 8.55518 | 8.05299 | 7.32527 | 1.65601 | 0.727715 | 1.65601 |
| Eif3m    | NM_145380    | 0.000203 | 12.9843 | 9.8676  | 9.13995 | 1.65594 | 0.727647 | 1.65594 |
| Slc35b4  | NM_021435    | 0.001631 | 7.57146 | 9.32493 | 8.59754 | 1.65564 | 0.727386 | 1.65564 |
| Cds2     | NM_138651    | 0.001281 | 8.06925 | 8.75596 | 8.02908 | 1.65505 | 0.726876 | 1.65505 |
| Larp7    | NM_138593    | 0.005406 | 5.47799 | 7.53704 | 6.81037 | 1.65482 | 0.726673 | 1.65482 |
| Zfp568   | NM_001167872 | 0.002988 | 6.44169 | 6.711   | 5.98454 | 1.65457 | 0.726458 | 1.65457 |
| Ptk2     | NM_007982    | 0.000665 | 9.57577 | 8.84456 | 8.11909 | 1.65344 | 0.725472 | 1.65344 |
| Afmid    | NM_027827    | 0.006012 | 5.31847 | 5.80251 | 5.07763 | 1.65276 | 0.724876 | 1.65276 |
| Akap9    | NM_194462    | 0.001267 | 8.09361 | 7.94351 | 7.2198  | 1.65143 | 0.723712 | 1.65143 |
| Nras     | NM_010937    | 0.000407 | 10.8672 | 8.2855  | 7.5625  | 1.65061 | 0.722995 | 1.65061 |
| Lpcat3   | NM_145130    | 0.000835 | 9.02561 | 8.79736 | 8.07446 | 1.6505  | 0.722902 | 1.6505  |

|               |              |          |         |         |         |         |          |         |
|---------------|--------------|----------|---------|---------|---------|---------|----------|---------|
| 9130404D08Rik | NM_001167939 | 0.001621 | 7.58408 | 9.21146 | 8.48878 | 1.65025 | 0.722687 | 1.65025 |
| Phka1         | NM_008832    | 0.004404 | 5.79651 | 6.99069 | 6.26833 | 1.64988 | 0.722363 | 1.64988 |
| Anxa1         | NM_010730    | 0.001729 | 7.45634 | 12.2923 | 11.5703 | 1.64954 | 0.722064 | 1.64954 |
| Ints1         | NM_026748    | 0.000359 | 11.2213 | 7.21364 | 6.49165 | 1.64946 | 0.721992 | 1.64946 |
| Fuk           | NM_172283    | 0.003618 | 6.11642 | 7.40494 | 6.68394 | 1.64833 | 0.721001 | 1.64833 |
| Rbm14         | NM_019869    | 0.007078 | 5.08048 | 7.70598 | 6.98515 | 1.64813 | 0.720829 | 1.64813 |
| Ipo8          | NM_001081113 | 0.002827 | 6.5386  | 9.13083 | 8.41012 | 1.648   | 0.720712 | 1.648   |
| Als2          | NM_028717    | 0.003973 | 5.96241 | 7.13509 | 6.41444 | 1.64792 | 0.720645 | 1.64792 |
| Rorb          | NM_001043354 | 0.005122 | 5.56051 | 5.4266  | 4.70641 | 1.6474  | 0.720188 | 1.6474  |
| Mphosph6      | NM_026758    | 0.007066 | 5.08301 | 7.89673 | 7.17691 | 1.64697 | 0.719813 | 1.64697 |
| Eif1ad        | NM_027236    | 0.002352 | 6.86932 | 8.42444 | 7.70468 | 1.64691 | 0.71976  | 1.64691 |
| Zbtb7b        | NM_009565    | 0.000131 | 14.5112 | 7.78457 | 7.06581 | 1.64577 | 0.71876  | 1.64577 |
| Mktn2         | NM_023290    | 0.004477 | 5.77052 | 8.16581 | 7.44733 | 1.64544 | 0.718473 | 1.64544 |
|               | ---          | 0.001146 | 8.30819 | 10.2367 | 9.51847 | 1.64511 | 0.718187 | 1.64511 |
| Ndufb8        | NM_026061    | 0.004648 | 5.71128 | 7.97828 | 7.26072 | 1.64439 | 0.717555 | 1.64439 |
| Thoc6         | NM_001008425 | 0.001296 | 8.04553 | 7.94225 | 7.22506 | 1.64398 | 0.717192 | 1.64398 |
| Gltp          | NM_019821    | 0.002218 | 6.97819 | 7.97633 | 7.26061 | 1.64229 | 0.715711 | 1.64229 |
| Pkn2          | NM_178654    | 0.000957 | 8.70905 | 9.50457 | 8.78927 | 1.64182 | 0.715297 | 1.64182 |
| Wbscr16       | NM_033572    | 0.003047 | 6.40795 | 4.92849 | 4.21342 | 1.64156 | 0.715067 | 1.64156 |
| Atg9a         | NM_001003917 | 0.000138 | 14.3234 | 7.80003 | 7.08562 | 1.64081 | 0.714409 | 1.64081 |
|               | ---          | 0.003055 | 6.40353 | 9.83367 | 9.11957 | 1.64046 | 0.714101 | 1.64046 |
| Abhd8         | NM_022419    | 0.00523  | 5.52834 | 7.87275 | 7.15869 | 1.64042 | 0.714063 | 1.64042 |
| Wfikn1        | NM_001100454 | 0.002002 | 7.17133 | 6.8654  | 6.15147 | 1.64026 | 0.713926 | 1.64026 |
| 0610007P22Rik | NM_026676    | 6.12E-05 | 17.6002 | 7.68539 | 6.97146 | 1.64026 | 0.713923 | 1.64026 |
|               | ---          | 0.001661 | 7.53499 | 7.82268 | 7.10893 | 1.64006 | 0.713749 | 1.64006 |
| Drg1          | NM_007879    | 0.004615 | 5.72262 | 9.31307 | 8.59951 | 1.63985 | 0.713563 | 1.63985 |
| Actn4         | NM_021895    | 0.001566 | 7.65368 | 11.2937 | 10.5803 | 1.63966 | 0.713398 | 1.63966 |
| Ehd2          | NM_153068    | 0.001562 | 7.65938 | 10.5582 | 9.84548 | 1.63886 | 0.712696 | 1.63886 |
| Apbb1ip       | NM_019456    | 0.002223 | 6.97401 | 6.34091 | 5.62824 | 1.63884 | 0.712677 | 1.63884 |
| Unc13b        | NM_001081413 | 7.09E-05 | 16.9584 | 5.69303 | 4.98073 | 1.63842 | 0.712304 | 1.63842 |
| Wdr19         | NM_153391    | 0.005805 | 5.37067 | 8.05017 | 7.33827 | 1.63795 | 0.711892 | 1.63795 |

|               |              |          |         |         |         |         |          |         |
|---------------|--------------|----------|---------|---------|---------|---------|----------|---------|
| Bend4         | NM_001164806 | 0.001201 | 8.20704 | 6.10511 | 5.39341 | 1.63773 | 0.7117   | 1.63773 |
| Tnrc6a        | NM_144925    | 0.002004 | 7.16964 | 8.70172 | 7.99121 | 1.63638 | 0.710509 | 1.63638 |
|               | ---          | 0.002715 | 6.61025 | 11.2325 | 10.5222 | 1.63609 | 0.710249 | 1.63609 |
| Commd5        | NM_025536    | 0.000477 | 10.4321 | 7.91022 | 7.20021 | 1.63582 | 0.710015 | 1.63582 |
| Mrpl35        | NM_025430    | 0.002359 | 6.86422 | 8.70764 | 7.99779 | 1.63563 | 0.709847 | 1.63563 |
| 4930519F16Rik | BC107248     | 0.001362 | 7.93985 | 3.71759 | 3.0079  | 1.63545 | 0.709689 | 1.63545 |
| Pcbp2         | NM_001103165 | 0.000553 | 10.0422 | 12.202  | 11.4925 | 1.63527 | 0.709526 | 1.63527 |
| Tprn          | NM_175286    | 0.000172 | 13.5523 | 5.97239 | 5.26288 | 1.63525 | 0.709507 | 1.63525 |
| Cnot4         | NM_016877    | 0.000381 | 11.0498 | 7.97428 | 7.26496 | 1.63503 | 0.709316 | 1.63503 |
| Pus3          | NM_023292    | 0.001074 | 8.45112 | 7.36737 | 6.65836 | 1.63468 | 0.709007 | 1.63468 |
| Zfp120        | NM_181266    | 0.003594 | 6.12733 | 5.33857 | 4.62964 | 1.6346  | 0.708936 | 1.6346  |
| Ide           | NM_031156    | 0.000504 | 10.2875 | 9.69403 | 8.98545 | 1.63419 | 0.708578 | 1.63419 |
| Pdzk1ip1      | NM_001164557 | 0.00599  | 5.32383 | 5.38156 | 4.6732  | 1.63395 | 0.708362 | 1.63395 |
| Gm527         | BC099503     | 0.004767 | 5.67167 | 6.96226 | 6.25434 | 1.63345 | 0.707921 | 1.63345 |
| 2310061104Rik | NM_001033630 | 4.11E-06 | 34.7016 | 7.60986 | 6.90291 | 1.63234 | 0.706943 | 1.63234 |
| Ap2b1         | NM_001035854 | 4.17E-05 | 19.3897 | 9.83803 | 9.1311  | 1.63233 | 0.706932 | 1.63233 |
| Tnpo3         | NM_177296    | 0.000251 | 12.2982 | 10.2195 | 9.51321 | 1.63156 | 0.706256 | 1.63156 |
| Dyrk1b        | NM_001037957 | 0.00528  | 5.51379 | 7.35598 | 6.6498  | 1.63148 | 0.70618  | 1.63148 |
| Mrpl28        | NM_024227    | 0.000689 | 9.48531 | 7.81675 | 7.11138 | 1.63057 | 0.705374 | 1.63057 |
| Pms1          | NM_153556    | 0.005324 | 5.50106 | 6.30466 | 5.59981 | 1.62998 | 0.704858 | 1.62998 |
| Stxbp3a       | NM_011504    | 0.002687 | 6.62885 | 9.2948  | 8.59019 | 1.6297  | 0.704607 | 1.6297  |
| Trappc10      | NM_001081055 | 0.000216 | 12.7832 | 8.47237 | 7.76781 | 1.62966 | 0.704568 | 1.62966 |
| Erc2          | NM_177814    | 0.00331  | 6.26619 | 5.49074 | 4.78619 | 1.62963 | 0.704547 | 1.62963 |
| Wdr1          | NM_011715    | 0.000616 | 9.7664  | 11.0452 | 10.3408 | 1.62943 | 0.704367 | 1.62943 |
| Sun2          | NM_194342    | 0.006188 | 5.27584 | 8.7401  | 8.03672 | 1.62832 | 0.703384 | 1.62832 |
|               | ---          | 0.002885 | 6.50325 | 7.55071 | 6.84777 | 1.62782 | 0.702939 | 1.62782 |
| Dlgap1        | NM_177639    | 0.000915 | 8.8127  | 4.93816 | 4.23556 | 1.62744 | 0.702602 | 1.62744 |
| Nup62         | NM_053074    | 0.002071 | 7.1071  | 8.84512 | 8.14267 | 1.62727 | 0.70245  | 1.62727 |
| Ywhaz         | NM_011740    | 0.001109 | 8.38144 | 10.5631 | 9.86071 | 1.62722 | 0.702414 | 1.62722 |
| Lass2         | NM_029789    | 0.000341 | 11.3693 | 10.435  | 9.73303 | 1.62674 | 0.701987 | 1.62674 |
| Rnu1b1        | NR_004412    | 0.002725 | 6.60382 | 7.17456 | 6.47295 | 1.62632 | 0.701612 | 1.62632 |

|          |              |          |         |         |         |         |          |         |
|----------|--------------|----------|---------|---------|---------|---------|----------|---------|
| Rnu1b1   | NR_004412    | 0.002725 | 6.60382 | 7.17456 | 6.47295 | 1.62632 | 0.701612 | 1.62632 |
| Rnu1b1   | NR_004412    | 0.002725 | 6.60382 | 7.17456 | 6.47295 | 1.62632 | 0.701612 | 1.62632 |
| Rnu1b1   | NR_004412    | 0.002725 | 6.60382 | 7.17456 | 6.47295 | 1.62632 | 0.701612 | 1.62632 |
| Rnu1b1   | NR_004412    | 0.002725 | 6.60382 | 7.17456 | 6.47295 | 1.62632 | 0.701612 | 1.62632 |
| Fiz1     | NM_011813    | 0.000248 | 12.3353 | 7.61664 | 6.91512 | 1.62623 | 0.701528 | 1.62623 |
| Qk       | NM_021881    | 0.000402 | 10.904  | 9.0921  | 8.39141 | 1.62529 | 0.700699 | 1.62529 |
| Cops7b   | NM_172974    | 0.000184 | 13.3212 | 7.46368 | 6.76308 | 1.62518 | 0.700602 | 1.62518 |
| Hnrnp1   | NM_021510    | 0.000958 | 8.70678 | 11.4434 | 10.7428 | 1.62516 | 0.700583 | 1.62516 |
| Inpp5b   | NM_008385    | 0.000641 | 9.66518 | 7.79886 | 7.09833 | 1.62511 | 0.700536 | 1.62511 |
| Capza1   | NM_009797    | 0.000294 | 11.8173 | 10.8326 | 10.1331 | 1.62386 | 0.699429 | 1.62386 |
| Chd7     | NM_001081417 | 0.005624 | 5.41817 | 6.64274 | 5.94354 | 1.62361 | 0.699202 | 1.62361 |
| Mtif2    | NM_133767    | 0.006797 | 5.13875 | 8.29327 | 7.59408 | 1.6236  | 0.699198 | 1.6236  |
| Rint1    | NM_177323    | 0.000903 | 8.84269 | 7.82719 | 7.12802 | 1.62358 | 0.699176 | 1.62358 |
| Tuba1b   | NM_011654    | 0.003604 | 6.12271 | 12.2628 | 11.5639 | 1.62325 | 0.698882 | 1.62325 |
| Zfp740   | NM_153194    | 0.001536 | 7.69288 | 8.54164 | 7.84373 | 1.62215 | 0.697907 | 1.62215 |
| Hcn1     | NM_010408    | 0.005735 | 5.38879 | 4.88701 | 4.18939 | 1.62183 | 0.69762  | 1.62183 |
| Ubash3b  | NM_176860    | 0.00443  | 5.78737 | 4.90956 | 4.21229 | 1.62143 | 0.697267 | 1.62143 |
| Phf5a    | NM_026737    | 0.001344 | 7.96842 | 9.82985 | 9.13265 | 1.62135 | 0.697195 | 1.62135 |
| Tm6sf1   | NM_145375    | 0.000277 | 11.9967 | 5.36698 | 4.66981 | 1.62132 | 0.697172 | 1.62132 |
| Scamp5   | NM_020270    | 0.006061 | 5.30641 | 7.08229 | 6.38513 | 1.62131 | 0.697156 | 1.62131 |
|          | ---          | 0.00068  | 9.51745 | 10.5799 | 9.88309 | 1.62089 | 0.696787 | 1.62089 |
| Mpv17l2  | NM_183170    | 0.003139 | 6.35644 | 8.82143 | 8.12501 | 1.62047 | 0.696413 | 1.62047 |
| Trpc1    | NM_011643    | 0.003709 | 6.07528 | 6.99956 | 6.30325 | 1.62036 | 0.696315 | 1.62036 |
| Trp53bp1 | NM_013735    | 0.005495 | 5.45313 | 8.2002  | 7.50394 | 1.6203  | 0.696257 | 1.6203  |
| Paip2b   | NM_146169    | 0.003307 | 6.26759 | 8.56535 | 7.86925 | 1.62012 | 0.696103 | 1.62012 |
| Pex3     | NM_019961    | 0.001893 | 7.27839 | 9.01417 | 8.31837 | 1.61978 | 0.695797 | 1.61978 |
| Ubxn4    | NM_026390    | 0.003045 | 6.40917 | 10.0151 | 9.31935 | 1.61975 | 0.695775 | 1.61975 |
| Usp40    | NM_001198573 | 0.001702 | 7.48659 | 8.43207 | 7.73632 | 1.61973 | 0.695754 | 1.61973 |
| Klhl11   | NM_172565    | 0.000645 | 9.65178 | 8.79483 | 8.09928 | 1.6195  | 0.695549 | 1.6195  |
| Micall1  | NM_177461    | 0.006967 | 5.1033  | 7.24137 | 6.5461  | 1.61919 | 0.695269 | 1.61919 |
| Mkln1    | NM_013791    | 0.000124 | 14.7048 | 9.31235 | 8.6174  | 1.61883 | 0.694954 | 1.61883 |

|               |              |          |         |         |         |         |          |         |
|---------------|--------------|----------|---------|---------|---------|---------|----------|---------|
| 1300001101Rik | BC072573     | 0.004812 | 5.65715 | 8.82144 | 8.12654 | 1.61878 | 0.694905 | 1.61878 |
|               | ---          | 0.005234 | 5.52723 | 9.79671 | 9.10186 | 1.61872 | 0.694855 | 1.61872 |
| Bckdk         | NM_009739    | 0.000286 | 11.8953 | 9.58301 | 8.88828 | 1.61858 | 0.694731 | 1.61858 |
| Vps33a        | NM_029929    | 0.000716 | 9.39201 | 8.80102 | 8.10669 | 1.61813 | 0.694327 | 1.61813 |
| Bard1         | NM_007525    | 0.006387 | 5.22933 | 4.8675  | 4.17331 | 1.61798 | 0.694193 | 1.61798 |
| 2810422O20Rik | BC050143     | 0.003989 | 5.95566 | 5.87747 | 5.18394 | 1.61723 | 0.693528 | 1.61723 |
| Pdpx          | NM_020271    | 0.003189 | 6.32937 | 5.95027 | 5.25726 | 1.61665 | 0.693005 | 1.61665 |
|               | ---          | 0.006874 | 5.12257 | 10.6696 | 9.97674 | 1.61643 | 0.692815 | 1.61643 |
| Phf21b        | NR_030731    | 8.64E-05 | 16.1285 | 5.67194 | 4.97914 | 1.61642 | 0.692799 | 1.61642 |
| Gtf3c3        | NM_001033194 | 0.001298 | 8.04121 | 8.44694 | 7.75427 | 1.61627 | 0.692671 | 1.61627 |
| Sart1         | AF129931     | 0.002194 | 6.99878 | 6.14182 | 5.45044 | 1.61483 | 0.691379 | 1.61483 |
| Cse1l         | NM_023565    | 0.002778 | 6.56949 | 10.298  | 9.60664 | 1.61481 | 0.691368 | 1.61481 |
| Mtmr4         | NM_133215    | 0.004838 | 5.64862 | 8.58081 | 7.89067 | 1.61344 | 0.690138 | 1.61344 |
|               | ---          | 0.00086  | 8.95577 | 9.03281 | 8.34289 | 1.61319 | 0.689913 | 1.61319 |
| Sh3bp4        | NM_133816    | 0.000992 | 8.62918 | 7.61898 | 6.9291  | 1.61315 | 0.689884 | 1.61315 |
| Maf1          | NM_001164607 | 0.004721 | 5.68707 | 9.74405 | 9.05453 | 1.61275 | 0.689522 | 1.61275 |
| Cnot3         | NM_146176    | 0.003405 | 6.21829 | 8.09468 | 7.406   | 1.61181 | 0.688679 | 1.61181 |
|               | ---          | 0.000366 | 11.1639 | 11.0271 | 10.3387 | 1.61148 | 0.688383 | 1.61148 |
| 2310044G17Rik | NM_173735    | 0.000428 | 10.7281 | 7.34042 | 6.65204 | 1.61147 | 0.688378 | 1.61147 |
| Ppp1r7        | NM_023200    | 0.004467 | 5.77397 | 9.06465 | 8.3763  | 1.61144 | 0.688353 | 1.61144 |
| Nsmce2        | NM_026746    | 0.006259 | 5.25889 | 8.93764 | 8.24974 | 1.61094 | 0.687901 | 1.61094 |
| 2400003C14Rik | NM_028018    | 5.22E-05 | 18.3241 | 10.0219 | 9.33404 | 1.6109  | 0.687868 | 1.6109  |
| Kazald1       | NM_178929    | 0.000191 | 13.1837 | 6.83813 | 6.15035 | 1.61081 | 0.687786 | 1.61081 |
| Wdr54         | NM_023790    | 0.005425 | 5.47256 | 6.66538 | 5.97793 | 1.61044 | 0.687451 | 1.61044 |
| Gatad2b       | NM_139304    | 0.000344 | 11.3505 | 9.0134  | 8.32607 | 1.6103  | 0.687331 | 1.6103  |
| Fbxo25        | NM_025785    | 0.000242 | 12.4128 | 8.75173 | 8.06459 | 1.61009 | 0.687144 | 1.61009 |
| Slc6a13       | NM_144512    | 0.004898 | 5.62955 | 5.4546  | 4.76748 | 1.61007 | 0.687128 | 1.61007 |
|               | ---          | 0.000287 | 11.8887 | 10.097  | 9.41009 | 1.60981 | 0.686893 | 1.60981 |
| Otub1         | NM_134150    | 0.003695 | 6.08133 | 9.67821 | 8.9914  | 1.60973 | 0.686817 | 1.60973 |
| Rnu12         | NR_004432    | 0.002016 | 7.15769 | 7.02918 | 6.34299 | 1.60903 | 0.686193 | 1.60903 |
| Jazf1         | NM_001168277 | 0.004699 | 5.69431 | 6.62429 | 5.93831 | 1.6088  | 0.685982 | 1.6088  |

|               |                                   |          |         |         |         |         |          |         |
|---------------|-----------------------------------|----------|---------|---------|---------|---------|----------|---------|
| Pcbp3         | NM_021568<br>ENSMUST0000009809    | 0.002875 | 6.50904 | 7.34224 | 6.65652 | 1.60851 | 0.685721 | 1.60851 |
| Gm10589       | 6                                 | 0.003875 | 6.00329 | 6.37091 | 5.68649 | 1.60705 | 0.684414 | 1.60705 |
| Apol10b       | NM_177820                         | 0.000273 | 12.0336 | 5.37572 | 4.69137 | 1.60697 | 0.684342 | 1.60697 |
| Exoc7         | NM_016857                         | 0.000957 | 8.71001 | 8.20066 | 7.51668 | 1.60656 | 0.683979 | 1.60656 |
| Trmt112       | NM_001166370                      | 0.006141 | 5.28708 | 7.67295 | 6.98941 | 1.60608 | 0.683544 | 1.60608 |
| Maea          | NM_021500                         | 0.000242 | 12.4085 | 10.3982 | 9.71477 | 1.60594 | 0.683416 | 1.60594 |
| Noc4l         | NM_153570                         | 0.005166 | 5.54713 | 8.04234 | 7.35903 | 1.60582 | 0.68331  | 1.60582 |
| Cnot1         | NM_153164                         | 0.002194 | 6.99862 | 10.2088 | 9.5263  | 1.60494 | 0.68252  | 1.60494 |
| Stk16         | NM_011494                         | 0.000209 | 12.8885 | 8.63661 | 7.95413 | 1.6049  | 0.682487 | 1.6049  |
| Caskin2       | NM_080643                         | 0.001064 | 8.47125 | 6.74078 | 6.05881 | 1.60433 | 0.681975 | 1.60433 |
| Elk3          | NM_013508                         | 0.000588 | 9.8855  | 9.18528 | 8.50332 | 1.60432 | 0.681962 | 1.60432 |
| C2cd3         | NM_001017985                      | 0.001548 | 7.67724 | 7.86116 | 7.17923 | 1.60429 | 0.681935 | 1.60429 |
| Hr            | NM_021877                         | 0.002143 | 7.04249 | 5.66454 | 4.98282 | 1.60405 | 0.681719 | 1.60405 |
| Pwwp2b        | NM_001098636                      | 0.006329 | 5.24271 | 7.03866 | 6.35698 | 1.60401 | 0.681687 | 1.60401 |
| Stard10       | NM_019990                         | 0.004791 | 5.66382 | 7.41307 | 6.7315  | 1.60389 | 0.681571 | 1.60389 |
| Rad51l3       | NM_011235                         | 0.000435 | 10.6835 | 7.704   | 7.02272 | 1.60357 | 0.681287 | 1.60357 |
| Rdm1          | NM_025654                         | 0.000815 | 9.08125 | 6.81194 | 6.13071 | 1.60351 | 0.68123  | 1.60351 |
| Ywhaz         | NM_011740                         | 5.64E-05 | 17.9677 | 12.237  | 11.5563 | 1.6029  | 0.680682 | 1.6029  |
| Mad2l2        | NM_027985                         | 0.005207 | 5.53509 | 6.57249 | 5.89197 | 1.60271 | 0.680513 | 1.60271 |
| Nup85         | NM_001002929                      | 0.002527 | 6.73883 | 7.91606 | 7.23561 | 1.60264 | 0.680447 | 1.60264 |
| Tubgcp3       | NM_198031                         | 0.000352 | 11.282  | 8.30953 | 7.6292  | 1.6025  | 0.680327 | 1.6025  |
| Ralgps1       | NM_175211                         | 0.000804 | 9.11281 | 6.31217 | 5.63192 | 1.60241 | 0.680244 | 1.60241 |
|               | ---                               | 0.000767 | 9.22624 | 4.35271 | 3.67346 | 1.6013  | 0.679246 | 1.6013  |
| 1700013F07Rik | BC116223                          | 0.001255 | 8.1127  | 5.16817 | 4.48898 | 1.60124 | 0.679193 | 1.60124 |
| Dhrs13        | NM_183286                         | 0.002197 | 6.99571 | 6.02523 | 5.34627 | 1.60098 | 0.678958 | 1.60098 |
| Ankfy1        | NM_009671                         | 0.00309  | 6.38393 | 9.00961 | 8.33161 | 1.59992 | 0.678    | 1.59992 |
| 1500032L24Rik | BC092006                          | 0.002709 | 6.61447 | 10.8463 | 10.1686 | 1.59966 | 0.677764 | 1.59966 |
| Smcr8         | NM_001085440<br>ENSMUST0000013103 | 0.003251 | 6.29658 | 7.79821 | 7.12048 | 1.59963 | 0.677734 | 1.59963 |
| Rnf213        | 5                                 | 0.004634 | 5.71601 | 6.30969 | 5.63202 | 1.59956 | 0.677674 | 1.59956 |
|               | ---                               | 0.001621 | 7.58398 | 10.0594 | 9.38181 | 1.59943 | 0.677556 | 1.59943 |

|               |              |          |         |         |         |         |          |         |
|---------------|--------------|----------|---------|---------|---------|---------|----------|---------|
| Ndufa4        | NM_010886    | 0.00237  | 6.85559 | 10.9859 | 10.3084 | 1.59929 | 0.677434 | 1.59929 |
| Brd7          | NM_012047    | 0.004433 | 5.78629 | 8.31089 | 7.63468 | 1.59793 | 0.676205 | 1.59793 |
| Pphln1        | NM_146062    | 0.000884 | 8.89134 | 9.44625 | 8.77005 | 1.59793 | 0.676204 | 1.59793 |
| Psip1         | NM_133948    | 0.0029   | 6.49379 | 7.22124 | 6.54503 | 1.59793 | 0.676204 | 1.59793 |
| Ralgapb       | NM_177658    | 0.002725 | 6.60365 | 8.93118 | 8.2552  | 1.59768 | 0.675976 | 1.59768 |
| Psm12         | NM_025894    | 0.000259 | 12.2036 | 9.57054 | 8.89554 | 1.59659 | 0.674997 | 1.59659 |
| Dcaf7         | NM_027946    | 0.003332 | 6.25454 | 9.67259 | 8.99775 | 1.59642 | 0.674842 | 1.59642 |
|               | ---          | 7.07E-05 | 16.9714 | 7.28311 | 6.60834 | 1.59635 | 0.674777 | 1.59635 |
| 6720401G13Rik | NR_015505    | 0.001835 | 7.3393  | 7.79551 | 7.12084 | 1.59623 | 0.67467  | 1.59623 |
| Rps6kb2       | NM_021485    | 0.000244 | 12.3907 | 7.63054 | 6.95627 | 1.59579 | 0.67427  | 1.59579 |
| Smpd3         | NM_021491    | 0.000317 | 11.5881 | 5.41029 | 4.7361  | 1.5957  | 0.67419  | 1.5957  |
| Pafah2        | NM_133880    | 0.002494 | 6.76259 | 7.55332 | 6.87925 | 1.59556 | 0.674064 | 1.59556 |
| BC017647      | NM_145430    | 0.001906 | 7.26571 | 7.47326 | 6.79954 | 1.59518 | 0.673724 | 1.59518 |
| Th1l          | NM_020580    | 0.000158 | 13.8307 | 7.26944 | 6.59591 | 1.59498 | 0.673534 | 1.59498 |
| Zfp1          | NM_001037665 | 0.003361 | 6.24033 | 7.37388 | 6.70096 | 1.5943  | 0.672923 | 1.5943  |
| Ppp1r11       | NM_029632    | 0.001306 | 8.02814 | 7.88765 | 7.21485 | 1.59416 | 0.6728   | 1.59416 |
| Pcm1          | NM_023662    | 0.002354 | 6.86819 | 9.29552 | 8.6231  | 1.59374 | 0.672417 | 1.59374 |
| Mavs          | NM_144888    | 0.002416 | 6.82068 | 8.66547 | 7.99356 | 1.59318 | 0.67191  | 1.59318 |
| 1500011H22Rik | BC019498     | 0.000529 | 10.1569 | 8.56517 | 7.89344 | 1.59298 | 0.671729 | 1.59298 |
| 5430437P03Rik | NM_026636    | 0.000405 | 10.8841 | 9.93171 | 9.26001 | 1.59295 | 0.671698 | 1.59295 |
| Kdm5a         | NM_145997    | 0.002032 | 7.14272 | 9.2715  | 8.60007 | 1.59266 | 0.671436 | 1.59266 |
| Tcp11l1       | NM_177190    | 0.001391 | 7.89654 | 6.9292  | 6.25794 | 1.59246 | 0.671257 | 1.59246 |
| Alpk1         | NM_027808    | 0.005531 | 5.4434  | 7.54879 | 6.87768 | 1.5923  | 0.671112 | 1.5923  |
| Pppde2        | NM_134095    | 0.003871 | 6.0049  | 8.34013 | 7.66967 | 1.59158 | 0.670462 | 1.59158 |
| Osbp2         | NM_152818    | 0.002126 | 7.05732 | 6.44529 | 5.77547 | 1.59088 | 0.669822 | 1.59088 |
| Ubxn1         | NM_146093    | 0.002163 | 7.02469 | 9.18373 | 8.51398 | 1.5908  | 0.669753 | 1.5908  |
| Mrps5         | NM_029963    | 0.006349 | 5.23788 | 7.23252 | 6.56381 | 1.58965 | 0.668711 | 1.58965 |
| Pcyox1l       | NM_172832    | 0.000744 | 9.30006 | 7.16699 | 6.49838 | 1.58954 | 0.668606 | 1.58954 |
| lkbkb         | NM_010546    | 0.000921 | 8.79678 | 8.23455 | 7.56663 | 1.58878 | 0.667921 | 1.58878 |
| Phf12         | NM_174852    | 0.00076  | 9.2469  | 8.6401  | 7.97268 | 1.58823 | 0.667418 | 1.58823 |
| D330012F22Rik | NM_178752    | 0.005308 | 5.50569 | 5.30589 | 4.6385  | 1.5882  | 0.667388 | 1.5882  |



|               |                        |          |         |         |         |         |          |         |
|---------------|------------------------|----------|---------|---------|---------|---------|----------|---------|
| Tada3         | NM_133932              | 0.004003 | 5.95034 | 7.70276 | 7.03538 | 1.58819 | 0.667388 | 1.58819 |
| Rnf40         | NM_172281              | 0.000282 | 11.9419 | 8.25451 | 7.58716 | 1.58815 | 0.667343 | 1.58815 |
|               | ---                    | 0.007056 | 5.08511 | 10.6599 | 9.99303 | 1.58762 | 0.666868 | 1.58762 |
| Ghdc          | NM_031871              | 0.003842 | 6.01702 | 6.58521 | 5.91838 | 1.58758 | 0.666828 | 1.58758 |
| lqsec1        | NM_001134384           | 0.000806 | 9.10845 | 7.91638 | 7.24998 | 1.58711 | 0.666402 | 1.58711 |
| Xpo5          | NM_028198              | 0.001034 | 8.53605 | 8.52838 | 7.86205 | 1.58703 | 0.666328 | 1.58703 |
| Gm10615       | ENSMUST0000009835<br>5 | 0.000335 | 11.422  | 4.60118 | 3.93488 | 1.58699 | 0.666297 | 1.58699 |
| Ppp1r12b      | NM_001081307           | 0.00249  | 6.76588 | 6.68522 | 6.01903 | 1.58687 | 0.666186 | 1.58687 |
| D330041H03Rik | NR_033554              | 0.004247 | 5.85472 | 6.46994 | 5.80378 | 1.58685 | 0.666162 | 1.58685 |
|               | ---                    | 0.004788 | 5.66484 | 11.5708 | 10.9047 | 1.58677 | 0.666094 | 1.58677 |
| Tesk2         | NM_146151              | 0.0024   | 6.83266 | 6.76051 | 6.09517 | 1.58594 | 0.665341 | 1.58594 |
| lqgap1        | NM_016721              | 0.001075 | 8.45008 | 9.75647 | 9.09128 | 1.58578 | 0.665194 | 1.58578 |
| Tyk2          | NM_018793              | 0.005132 | 5.55737 | 6.78276 | 6.11774 | 1.58559 | 0.665019 | 1.58559 |
| Ddx20         | NM_017397              | 0.004292 | 5.83788 | 7.78435 | 7.1199  | 1.58497 | 0.664453 | 1.58497 |
| Strbp         | NM_009261              | 0.000438 | 10.663  | 5.43535 | 4.77142 | 1.58439 | 0.66393  | 1.58439 |
| Tsen54        | NM_029557              | 0.000132 | 14.4737 | 7.80549 | 7.14215 | 1.58374 | 0.663339 | 1.58374 |
|               | ---                    | 0.001964 | 7.20755 | 8.40538 | 7.74208 | 1.5837  | 0.663301 | 1.5837  |
|               | ---                    | 0.000143 | 14.1973 | 5.24635 | 4.58329 | 1.58344 | 0.66306  | 1.58344 |
| Med19         | NM_025885              | 0.002191 | 7.0008  | 7.84615 | 7.18314 | 1.58339 | 0.663016 | 1.58339 |
| Nr2c2ap       | NM_001025586           | 0.006129 | 5.28996 | 7.74432 | 7.08134 | 1.58336 | 0.662986 | 1.58336 |
| Disp2         | NM_170593              | 0.003397 | 6.22207 | 5.13945 | 4.47679 | 1.583   | 0.662662 | 1.583   |
| Ino80d        | NM_001114609           | 0.001554 | 7.66929 | 7.70052 | 7.03856 | 1.58223 | 0.66196  | 1.58223 |
| Letm1         | NM_019694              | 0.0036   | 6.12457 | 7.45055 | 6.78869 | 1.58211 | 0.661851 | 1.58211 |
| Cyhr1         | NM_019396              | 0.000287 | 11.8869 | 8.64238 | 7.98149 | 1.58106 | 0.660888 | 1.58106 |
| Tmem150a      | NM_144916              | 2.39E-05 | 22.3002 | 8.73435 | 8.07382 | 1.58067 | 0.660533 | 1.58067 |
|               | ---                    | 0.002574 | 6.70546 | 4.38347 | 3.72293 | 1.58066 | 0.660531 | 1.58066 |
| Vps52         | NM_172620              | 0.000175 | 13.4905 | 7.711   | 7.0507  | 1.58041 | 0.660299 | 1.58041 |
| Mrps18a       | NM_026768              | 0.004808 | 5.6583  | 8.05026 | 7.39044 | 1.57988 | 0.659817 | 1.57988 |
| Pds5b         | NM_175310              | 0.003076 | 6.39166 | 8.4291  | 7.77046 | 1.57859 | 0.658634 | 1.57859 |
| Cd3eap        | NM_145822              | 0.000492 | 10.3495 | 6.9358  | 6.27744 | 1.57829 | 0.65836  | 1.57829 |

|               |              |          |         |         |         |         |          |         |
|---------------|--------------|----------|---------|---------|---------|---------|----------|---------|
| Sall1         | NM_021390    | 0.003198 | 6.32488 | 5.73982 | 5.08146 | 1.57829 | 0.658358 | 1.57829 |
| Srrm2         | NM_175229    | 0.001232 | 8.15242 | 10.4003 | 9.74195 | 1.57827 | 0.658343 | 1.57827 |
| Arid2         | NM_175251    | 0.003008 | 6.42999 | 8.7297  | 8.0718  | 1.57779 | 0.657907 | 1.57779 |
| Triobp        | NM_001039156 | 0.002293 | 6.91651 | 7.32883 | 6.67112 | 1.57758 | 0.657709 | 1.57758 |
| Vps35         | NM_022997    | 0.002586 | 6.69749 | 10.3656 | 9.7086  | 1.57684 | 0.657039 | 1.57684 |
| Ttc12         | NM_172770    | 0.004857 | 5.64253 | 6.9628  | 6.30595 | 1.57664 | 0.656852 | 1.57664 |
| Plekha5       | NM_144920    | 0.000719 | 9.38059 | 7.65115 | 6.99447 | 1.57645 | 0.65668  | 1.57645 |
| Arb2          | NM_145429    | 0.001509 | 7.72831 | 6.43403 | 5.77873 | 1.57495 | 0.655302 | 1.57495 |
| Dhx36         | NM_028136    | 0.000588 | 9.88539 | 9.23304 | 8.57805 | 1.5746  | 0.654989 | 1.5746  |
| Pno1          | NM_025443    | 0.001525 | 7.70727 | 8.20897 | 7.55402 | 1.57457 | 0.654955 | 1.57457 |
| Obfc1         | NM_175360    | 0.002838 | 6.53187 | 8.27087 | 7.61595 | 1.57453 | 0.654923 | 1.57453 |
| Dppa2         | NM_028615    | 0.000509 | 10.2576 | 4.91519 | 4.26052 | 1.57426 | 0.654669 | 1.57426 |
| Tox4          | NM_023434    | 0.000726 | 9.36023 | 8.27462 | 7.62007 | 1.57412 | 0.654549 | 1.57412 |
| 4632419122Rik | BC067002     | 0.000486 | 10.3836 | 7.95498 | 7.30083 | 1.57369 | 0.654151 | 1.57369 |
| Dbndd2        | NM_001048227 | 0.00401  | 5.94748 | 5.37489 | 4.72133 | 1.57305 | 0.653565 | 1.57305 |
| Kdm4b         | NM_172132    | 0.002419 | 6.81847 | 8.19884 | 7.54587 | 1.5724  | 0.652966 | 1.5724  |
| Nek8          | NM_080849    | 0.000764 | 9.23583 | 6.62603 | 5.97317 | 1.57229 | 0.652869 | 1.57229 |
| Exosc5        | NM_138586    | 4.05E-05 | 19.5301 | 7.96961 | 7.31685 | 1.57217 | 0.652759 | 1.57217 |
| Ncoa2         | NM_008678    | 0.004803 | 5.66009 | 7.63807 | 6.98546 | 1.57201 | 0.652608 | 1.57201 |
| Eri2          | NM_027698    | 0.004578 | 5.7353  | 6.99945 | 6.34815 | 1.57058 | 0.651301 | 1.57058 |
| Kctd9         | NM_001111028 | 0.006461 | 5.2123  | 7.98247 | 7.3315  | 1.57021 | 0.650961 | 1.57021 |
| Pdhx          | NM_175094    | 0.002539 | 6.73026 | 7.37882 | 6.72829 | 1.56974 | 0.650528 | 1.56974 |
| Gtf3c1        | NM_207239    | 0.000508 | 10.2645 | 8.3463  | 7.69585 | 1.56966 | 0.65045  | 1.56966 |
| Med23         | NM_001166416 | 0.001218 | 8.17732 | 8.48496 | 7.8355  | 1.56858 | 0.649457 | 1.56858 |
| Atp5g2        | NM_026468    | 0.001173 | 8.25871 | 11.1402 | 10.4924 | 1.5668  | 0.647825 | 1.5668  |
|               | ---          | 0.000707 | 9.42356 | 6.29033 | 5.64294 | 1.56633 | 0.647389 | 1.56633 |
| Ehd1          | NM_010119    | 0.004802 | 5.66016 | 8.83676 | 8.18983 | 1.56583 | 0.646926 | 1.56583 |
|               | ---          | 0.001329 | 7.9912  | 11.7347 | 11.088  | 1.56556 | 0.646678 | 1.56556 |
| Pmpca         | NM_173180    | 0.001003 | 8.60356 | 9.2139  | 8.56729 | 1.56548 | 0.646608 | 1.56548 |
| 4931408A02Rik | AF358257     | 0.003676 | 6.09023 | 5.87352 | 5.22727 | 1.56509 | 0.64625  | 1.56509 |
| Nop56         | NM_024193    | 0.00591  | 5.34387 | 10.4049 | 9.75872 | 1.56504 | 0.646199 | 1.56504 |

|               |              |          |         |         |         |         |          |         |
|---------------|--------------|----------|---------|---------|---------|---------|----------|---------|
|               | ---          | 0.00704  | 5.08828 | 8.77686 | 8.13078 | 1.56492 | 0.646089 | 1.56492 |
| Rbm27         | NM_172626    | 0.006189 | 5.27541 | 8.22598 | 7.58052 | 1.56424 | 0.645465 | 1.56424 |
| Asna1         | NM_019652    | 0.000683 | 9.50648 | 9.66988 | 9.02455 | 1.56409 | 0.645327 | 1.56409 |
| Eps15         | NM_007943    | 4.74E-05 | 18.7746 | 9.1736  | 8.52847 | 1.56388 | 0.64513  | 1.56388 |
| Atp5b         | NM_016774    | 0.000652 | 9.62235 | 12.1286 | 11.4836 | 1.56379 | 0.64505  | 1.56379 |
| Pigw          | NM_027388    | 0.001486 | 7.76    | 6.69604 | 6.05114 | 1.56364 | 0.644905 | 1.56364 |
| Nkiras2       | NM_028024    | 0.006565 | 5.18915 | 6.86675 | 6.22236 | 1.56309 | 0.644396 | 1.56309 |
| Lnpep         | NM_172827    | 0.001016 | 8.57498 | 10.3647 | 9.72186 | 1.56135 | 0.642797 | 1.56135 |
| Rtn3          | NM_001003934 | 0.005418 | 5.47458 | 11.2686 | 10.6261 | 1.56104 | 0.642503 | 1.56104 |
| Phb           | NM_008831    | 0.000155 | 13.8982 | 10.0514 | 9.4091  | 1.56078 | 0.642263 | 1.56078 |
| Kdm1a         | NM_133872    | 0.000155 | 13.9107 | 9.29912 | 8.65705 | 1.56056 | 0.642067 | 1.56056 |
| Mapk3         | NM_011952    | 0.007069 | 5.08246 | 9.61694 | 8.97488 | 1.56056 | 0.642063 | 1.56056 |
| Acer3         | NM_025408    | 0.000279 | 11.9692 | 6.65053 | 6.00892 | 1.56007 | 0.64161  | 1.56007 |
| Lmnb2         | NM_010722    | 0.000728 | 9.35343 | 6.61895 | 5.97742 | 1.55998 | 0.641531 | 1.55998 |
| Ulk3          | NM_027895    | 0.000245 | 12.3823 | 6.40543 | 5.76413 | 1.55973 | 0.641297 | 1.55973 |
| Gak           | NM_153569    | 0.001569 | 7.65029 | 8.92423 | 8.28294 | 1.55972 | 0.641288 | 1.55972 |
| Zfp687        | NM_030074    | 0.004542 | 5.74772 | 7.37717 | 6.73596 | 1.55964 | 0.641217 | 1.55964 |
| St3gal3       | NM_009176    | 0.004109 | 5.90765 | 7.8578  | 7.21676 | 1.55945 | 0.641038 | 1.55945 |
| Capza1        | NM_009797    | 0.000453 | 10.5705 | 10.6516 | 10.0107 | 1.5593  | 0.640896 | 1.5593  |
| Cdk12         | NM_001109626 | 0.005025 | 5.58992 | 7.81503 | 7.17418 | 1.55925 | 0.640852 | 1.55925 |
| Sfxn3         | NM_053197    | 0.001512 | 7.72528 | 10.0375 | 9.39734 | 1.55853 | 0.640184 | 1.55853 |
| Anxa4         | NM_013471    | 0.002337 | 6.88169 | 10.307  | 9.66696 | 1.55834 | 0.640014 | 1.55834 |
| Rell1         | NM_145923    | 0.002395 | 6.83645 | 8.85596 | 8.21667 | 1.55756 | 0.639288 | 1.55756 |
| Rnf185        | NM_145355    | 0.003554 | 6.14631 | 8.23782 | 7.5988  | 1.55727 | 0.639022 | 1.55727 |
| Eif2ak2       | NM_011163    | 0.006054 | 5.30798 | 7.73121 | 7.0923  | 1.55715 | 0.638904 | 1.55715 |
| 2810407C02Rik | NM_001040396 | 0.000641 | 9.66742 | 11.0014 | 10.3626 | 1.55709 | 0.63885  | 1.55709 |
| Tnk2          | NM_016788    | 0.001928 | 7.2436  | 7.27919 | 6.64045 | 1.55697 | 0.638739 | 1.55697 |
| Gli3          | NM_008130    | 0.001468 | 7.78529 | 6.84412 | 6.20574 | 1.55659 | 0.638387 | 1.55659 |
| 1110006O24Rik | NR_027810    | 0.000478 | 10.4281 | 6.33325 | 5.69499 | 1.55645 | 0.638258 | 1.55645 |
| Psme3         | NM_011192    | 0.00065  | 9.6311  | 9.26617 | 8.62801 | 1.55635 | 0.638162 | 1.55635 |
| Atf6b         | NM_017406    | 0.000994 | 8.62339 | 8.23139 | 7.59338 | 1.55618 | 0.638011 | 1.55618 |

|               |              |          |         |         |         |         |          |         |
|---------------|--------------|----------|---------|---------|---------|---------|----------|---------|
| Tom1l2        | NM_153080    | 0.000707 | 9.422   | 8.16727 | 7.5307  | 1.55462 | 0.636563 | 1.55462 |
| Ftsj3         | NM_025310    | 0.004649 | 5.71096 | 9.87356 | 9.23707 | 1.55455 | 0.636496 | 1.55455 |
| Timm17a       | NM_011590    | 0.000372 | 11.1201 | 10.1876 | 9.55126 | 1.55442 | 0.636372 | 1.55442 |
| Idh3b         | NM_130884    | 0.002011 | 7.16236 | 10.8516 | 10.2153 | 1.55434 | 0.636298 | 1.55434 |
|               | ---          | 0.001787 | 7.39083 | 9.66715 | 9.03126 | 1.5539  | 0.635893 | 1.5539  |
| 1700081L11Rik | BC054752     | 2.03E-05 | 23.2464 | 8.69385 | 8.05834 | 1.55349 | 0.635515 | 1.55349 |
| Dhx35         | NM_145742    | 0.002343 | 6.8766  | 7.86592 | 7.23048 | 1.55341 | 0.63544  | 1.55341 |
| Shoc2         | NM_019658    | 0.001354 | 7.95329 | 9.58072 | 8.94533 | 1.55335 | 0.635383 | 1.55335 |
| Zfp707        | NM_001081065 | 0.003268 | 6.28759 | 6.91182 | 6.27689 | 1.55287 | 0.634933 | 1.55287 |
| 5830418K08Rik | NM_176976    | 0.006294 | 5.25076 | 6.20342 | 5.56851 | 1.55283 | 0.634902 | 1.55283 |
| Nup160        | NM_021512    | 0.00432  | 5.82745 | 8.7761  | 8.14142 | 1.5526  | 0.634683 | 1.5526  |
| Larp4         | NM_001024526 | 0.00101  | 8.58703 | 9.96743 | 9.3333  | 1.55201 | 0.634133 | 1.55201 |
| Slc4a3        | NM_009208    | 0.006023 | 5.31561 | 7.27409 | 6.64002 | 1.55194 | 0.634076 | 1.55194 |
|               | ---          | 0.002112 | 7.06968 | 9.72886 | 9.09534 | 1.55134 | 0.633516 | 1.55134 |
| H2-M3         | NM_013819    | 0.002629 | 6.66761 | 6.602   | 5.96849 | 1.55134 | 0.633512 | 1.55134 |
| Mff           | NM_029409    | 0.001479 | 7.76975 | 9.43233 | 8.79891 | 1.55123 | 0.633415 | 1.55123 |
| Syngt2        | NM_009304    | 0.000763 | 9.23824 | 9.8419  | 9.20936 | 1.5503  | 0.632544 | 1.5503  |
| Limk2         | NM_010718    | 0.001457 | 7.80143 | 7.83084 | 7.19884 | 1.5497  | 0.631993 | 1.5497  |
| Derl2         | NM_033562    | 0.005682 | 5.40281 | 9.07778 | 8.44601 | 1.54946 | 0.631764 | 1.54946 |
| Zmynd8        | NM_027230    | 0.003685 | 6.08596 | 9.26077 | 8.6296  | 1.54882 | 0.631173 | 1.54882 |
| Por           | NM_008898    | 0.002762 | 6.57999 | 9.31371 | 8.68266 | 1.54869 | 0.631048 | 1.54869 |
| Trabd         | NM_026485    | 0.006981 | 5.10035 | 8.10643 | 7.47572 | 1.54833 | 0.630714 | 1.54833 |
| Gmeb2         | NM_198169    | 0.000968 | 8.68398 | 6.9342  | 6.30385 | 1.54794 | 0.630346 | 1.54794 |
| B3gnt1        | NM_178664    | 0.003759 | 6.0531  | 5.91449 | 5.28438 | 1.54768 | 0.630107 | 1.54768 |
| Prmt2         | NM_133182    | 0.003116 | 6.36947 | 8.83788 | 8.20779 | 1.54766 | 0.630092 | 1.54766 |
| Ubl3          | NM_011908    | 0.00655  | 5.19241 | 9.2587  | 8.62939 | 1.54682 | 0.629309 | 1.54682 |
| Strn4         | NM_133789    | 0.000202 | 13.0074 | 7.71849 | 7.08929 | 1.54671 | 0.629202 | 1.54671 |
| Ssrp1         | NM_182990    | 0.000994 | 8.62359 | 9.70808 | 9.07897 | 1.54661 | 0.629106 | 1.54661 |
| Kctd15        | NM_146188    | 0.00069  | 9.48316 | 7.56836 | 6.93954 | 1.5463  | 0.628825 | 1.5463  |
| Hoxa7         | NM_010455    | 0.001517 | 7.71781 | 7.1678  | 6.53935 | 1.5459  | 0.628448 | 1.5459  |
| Rabl5         | NM_026073    | 0.002726 | 6.603   | 7.94114 | 7.31372 | 1.5448  | 0.627419 | 1.5448  |

|               |              |          |         |         |         |         |          |         |
|---------------|--------------|----------|---------|---------|---------|---------|----------|---------|
| Zfp689        | NM_175163    | 0.003278 | 6.28268 | 7.37691 | 6.74993 | 1.54433 | 0.626978 | 1.54433 |
| Cnm4          | NM_033570    | 0.001225 | 8.16482 | 6.55839 | 5.9315  | 1.54423 | 0.626884 | 1.54423 |
| Ubr1          | NM_009461    | 0.005033 | 5.58748 | 8.52292 | 7.89618 | 1.54407 | 0.626742 | 1.54407 |
| Camta1        | NM_001081557 | 0.001319 | 8.00838 | 8.36525 | 7.7386  | 1.54397 | 0.626648 | 1.54397 |
| Hip1r         | NM_145070    | 0.00457  | 5.73801 | 7.05705 | 6.43068 | 1.54367 | 0.626365 | 1.54367 |
| Wtap          | NM_001113533 | 0.000463 | 10.511  | 10.2655 | 9.63916 | 1.54367 | 0.626362 | 1.54367 |
| Gpi1          | NM_008155    | 0.00421  | 5.86879 | 11.4661 | 10.8405 | 1.54284 | 0.625587 | 1.54284 |
|               | ---          | 0.001178 | 8.24912 | 12.2398 | 11.6147 | 1.54237 | 0.625152 | 1.54237 |
| Dph1          | NM_144491    | 0.006589 | 5.18378 | 7.99544 | 7.37066 | 1.54198 | 0.624781 | 1.54198 |
| Psmc3ip       | NM_008949    | 0.003579 | 6.13431 | 5.64029 | 5.01554 | 1.54194 | 0.624747 | 1.54194 |
| Dcun1d2       | NM_001024504 | 0.006632 | 5.17429 | 7.87463 | 7.2501  | 1.54172 | 0.624537 | 1.54172 |
| Ctdspl2       | NM_212450    | 0.005725 | 5.39128 | 7.09895 | 6.47461 | 1.5415  | 0.624335 | 1.5415  |
| Grf1          | NM_172739    | 0.001734 | 7.44977 | 7.94536 | 7.32132 | 1.54118 | 0.624037 | 1.54118 |
| Ccdc86        | NM_023731    | 8.86E-05 | 16.0281 | 7.6854  | 7.06142 | 1.54111 | 0.623972 | 1.54111 |
| Myef2         | NM_001162417 | 0.005787 | 5.3752  | 8.03606 | 7.41236 | 1.54082 | 0.623703 | 1.54082 |
| Tubgcp2       | NM_133755    | 0.005182 | 5.5426  | 7.87067 | 7.24709 | 1.5407  | 0.623581 | 1.5407  |
| Recql5        | NM_130454    | 6.51E-05 | 17.3288 | 6.91971 | 6.2964  | 1.5404  | 0.623309 | 1.5404  |
|               | ---          | 0.00227  | 6.93489 | 11.1295 | 10.5063 | 1.54018 | 0.623102 | 1.54018 |
| Trpt1         | NM_153597    | 0.000387 | 11.0054 | 6.55029 | 5.92836 | 1.53894 | 0.621937 | 1.53894 |
|               | ---          | 0.003397 | 6.22198 | 3.88968 | 3.26885 | 1.53776 | 0.620834 | 1.53776 |
| Srsf2         | NM_011358    | 0.006931 | 5.11059 | 10.5929 | 9.97203 | 1.53775 | 0.620825 | 1.53775 |
| Atp6v0c       | NM_009729    | 0.004804 | 5.65964 | 11.2996 | 10.6789 | 1.53755 | 0.620631 | 1.53755 |
| Tuba1b        | NM_011654    | 0.006437 | 5.21776 | 12.536  | 11.9154 | 1.5375  | 0.620588 | 1.5375  |
| Btbd11        | NM_028709    | 0.001461 | 7.79577 | 6.30967 | 5.68938 | 1.53718 | 0.620289 | 1.53718 |
| 2310067B10Rik | NM_028014    | 0.004948 | 5.61364 | 7.99522 | 7.37548 | 1.5366  | 0.619738 | 1.5366  |
| Baiap2        | NM_130862    | 0.000726 | 9.35819 | 8.83909 | 8.21973 | 1.53619 | 0.619359 | 1.53619 |
| 1600027N09Rik | NM_028479    | 0.001719 | 7.46787 | 6.20564 | 5.58642 | 1.53605 | 0.619223 | 1.53605 |
| Dido1         | NM_175551    | 0.000636 | 9.68431 | 7.85903 | 7.24015 | 1.53568 | 0.618876 | 1.53568 |
| Ndufs8        | NM_144870    | 0.000666 | 9.57126 | 8.3894  | 7.77087 | 1.53532 | 0.618535 | 1.53532 |
| Ccng2         | NM_007635    | 0.002865 | 6.51501 | 8.9466  | 8.3283  | 1.53506 | 0.618297 | 1.53506 |
| Becn1         | NM_019584    | 0.00265  | 6.65364 | 9.06604 | 8.4479  | 1.5349  | 0.618145 | 1.5349  |

|               |              |          |         |         |         |         |          |         |
|---------------|--------------|----------|---------|---------|---------|---------|----------|---------|
| Med25         | NM_029365    | 0.002922 | 6.48047 | 8.1053  | 7.48817 | 1.53382 | 0.61713  | 1.53382 |
| Tnks1bp1      | NM_001081260 | 0.000125 | 14.6759 | 9.34595 | 8.72955 | 1.53305 | 0.616405 | 1.53305 |
| Atrn          | NM_009730    | 0.000991 | 8.63122 | 8.61486 | 7.99903 | 1.53244 | 0.615833 | 1.53244 |
| Srgap2        | NM_001081011 | 0.002413 | 6.82263 | 7.80301 | 7.18735 | 1.53225 | 0.615652 | 1.53225 |
| Mogat2        | NM_177448    | 0.001361 | 7.94188 | 5.30803 | 4.69273 | 1.53187 | 0.615292 | 1.53187 |
| Appbp2        | NM_025825    | 0.004893 | 5.63123 | 10.5137 | 9.89924 | 1.53096 | 0.614437 | 1.53096 |
| Crtc1         | NM_001004062 | 0.001434 | 7.83335 | 7.09343 | 6.4791  | 1.53084 | 0.614328 | 1.53084 |
| Rab11fip5     | NM_001003955 | 0.006872 | 5.12303 | 8.01338 | 7.39932 | 1.53056 | 0.614061 | 1.53056 |
| Fam134c       | BC016089     | 0.000946 | 8.73579 | 9.20584 | 8.59218 | 1.53014 | 0.613662 | 1.53014 |
| Kdm5c         | NM_013668    | 0.001493 | 7.75041 | 8.58142 | 7.96776 | 1.53013 | 0.613656 | 1.53013 |
|               | ---          | 0.000335 | 11.4264 | 9.15881 | 8.54534 | 1.52993 | 0.613465 | 1.52993 |
|               | ---          | 4.26E-05 | 19.2901 | 11.9604 | 11.3471 | 1.52968 | 0.613226 | 1.52968 |
| Atp5g2        | NM_026468    | 0.001623 | 7.5813  | 10.9729 | 10.3601 | 1.5292  | 0.612779 | 1.5292  |
| Smurf1        | NM_001038627 | 0.005143 | 5.5541  | 8.12929 | 7.51666 | 1.52905 | 0.612635 | 1.52905 |
|               | ---          | 0.001572 | 7.64561 | 9.87877 | 9.26644 | 1.52873 | 0.612332 | 1.52873 |
| Wdr59         | NM_001170743 | 0.000754 | 9.26796 | 7.96137 | 7.34954 | 1.52819 | 0.611828 | 1.52819 |
| Vrk2          | NM_027260    | 0.005691 | 5.40023 | 7.32309 | 6.7114  | 1.52805 | 0.61169  | 1.52805 |
| Wdfy1         | NM_001111279 | 0.002061 | 7.116   | 8.05277 | 7.44189 | 1.52719 | 0.610881 | 1.52719 |
| Ngrn          | NR_028053    | 0.000192 | 13.165  | 7.60165 | 6.99099 | 1.52696 | 0.610661 | 1.52696 |
| Fgd2          | NM_001159538 | 0.00597  | 5.3287  | 6.38351 | 5.77336 | 1.52642 | 0.61015  | 1.52642 |
| Rap2b         | NM_028712    | 0.005823 | 5.36609 | 8.43326 | 7.82328 | 1.52623 | 0.609977 | 1.52623 |
| Cant1         | NM_029502    | 0.002937 | 6.4719  | 7.49402 | 6.88411 | 1.52616 | 0.609905 | 1.52616 |
| Git2          | NM_019834    | 0.002648 | 6.65467 | 7.98419 | 7.37476 | 1.52565 | 0.609426 | 1.52565 |
| Mikl          | NM_029005    | 0.001185 | 8.23709 | 8.45303 | 7.84362 | 1.52563 | 0.609403 | 1.52563 |
| Cd9           | NM_007657    | 0.002722 | 6.60541 | 11.7469 | 11.1375 | 1.52563 | 0.609402 | 1.52563 |
| Gpi1          | NM_008155    | 0.001773 | 7.40677 | 11.111  | 10.5019 | 1.52536 | 0.609153 | 1.52536 |
| Shroom4       | NM_001040459 | 0.004804 | 5.65958 | 5.51228 | 4.90317 | 1.52532 | 0.609107 | 1.52532 |
| 1700021K19Rik | NM_172615    | 0.004094 | 5.91374 | 7.6092  | 7.00014 | 1.52527 | 0.609065 | 1.52527 |
|               | ---          | 0.000565 | 9.98486 | 9.42171 | 8.81277 | 1.52514 | 0.608942 | 1.52514 |
| Myo1d         | NM_177390    | 0.006767 | 5.14513 | 8.05322 | 7.44458 | 1.52482 | 0.608635 | 1.52482 |
| Dnajb1        | NM_018808    | 0.004767 | 5.6717  | 8.38172 | 7.77339 | 1.5245  | 0.608333 | 1.5245  |

|               |              |          |         |         |         |         |          |         |
|---------------|--------------|----------|---------|---------|---------|---------|----------|---------|
|               | ---          | 0.000174 | 13.51   | 11.5715 | 10.9636 | 1.52402 | 0.607885 | 1.52402 |
| Tomm22        | NM_172609    | 0.000522 | 10.1908 | 8.24323 | 7.6361  | 1.52322 | 0.607124 | 1.52322 |
| Mgea5         | NM_023799    | 0.000881 | 8.89878 | 8.85401 | 8.24691 | 1.5232  | 0.607102 | 1.5232  |
| D430042O09Rik | BC158019     | 0.00036  | 11.2139 | 7.05362 | 6.4467  | 1.523   | 0.606916 | 1.523   |
| Taok3         | NM_001081308 | 0.000207 | 12.9267 | 7.72287 | 7.11599 | 1.52297 | 0.606884 | 1.52297 |
| Heatr6        | NM_145432    | 5.99E-05 | 17.6993 | 8.16326 | 7.55673 | 1.52259 | 0.606525 | 1.52259 |
| Acp6          | NM_019800    | 0.000813 | 9.08766 | 8.13198 | 7.52705 | 1.5209  | 0.604927 | 1.5209  |
| Necap1        | NM_026267    | 0.002651 | 6.65271 | 8.984   | 8.37957 | 1.52038 | 0.604431 | 1.52038 |
| Nup50         | NM_016714    | 0.001257 | 8.10901 | 9.19285 | 8.58863 | 1.52015 | 0.60421  | 1.52015 |
| Gls2          | NM_001033264 | 0.005963 | 5.33061 | 5.45163 | 4.84745 | 1.52011 | 0.604179 | 1.52011 |
| Gtf3c2        | NM_027901    | 0.001618 | 7.58767 | 8.97421 | 8.37011 | 1.52004 | 0.604109 | 1.52004 |
| Csnk2a1       | NM_007788    | 7.26E-06 | 30.1006 | 10.2667 | 9.66274 | 1.51991 | 0.603988 | 1.51991 |
| Sipa1l3       | NM_001081028 | 5.05E-05 | 18.4778 | 7.36277 | 6.75921 | 1.51947 | 0.603566 | 1.51947 |
| Chfr          | NM_172717    | 0.005642 | 5.41325 | 8.03343 | 7.42988 | 1.51945 | 0.603548 | 1.51945 |
|               | ---          | 0.001193 | 8.22147 | 7.107   | 6.50358 | 1.51932 | 0.603422 | 1.51932 |
| Stub1         | NM_019719    | 0.001171 | 8.26176 | 9.67338 | 9.07001 | 1.51926 | 0.603373 | 1.51926 |
| Camk2b        | NM_007595    | 0.003387 | 6.22685 | 5.92917 | 5.32581 | 1.51925 | 0.603358 | 1.51925 |
| Suv420h2      | NM_146177    | 0.002633 | 6.66473 | 7.65126 | 7.04792 | 1.51923 | 0.603337 | 1.51923 |
| Csnk2a1       | NM_007788    | 1.62E-05 | 24.6136 | 10.506  | 9.90308 | 1.51874 | 0.602879 | 1.51874 |
| Srsf1         | NM_173374    | 0.001247 | 8.1275  | 10.5441 | 9.94185 | 1.51811 | 0.602281 | 1.51811 |
| Coq9          | NM_026452    | 0.000694 | 9.47018 | 8.94349 | 8.34167 | 1.51764 | 0.601826 | 1.51764 |
| Pmvk          | NM_026784    | 0.004227 | 5.86204 | 6.29366 | 5.69256 | 1.51687 | 0.601094 | 1.51687 |
| Caprin1       | NM_016739    | 0.00023  | 12.582  | 10.8581 | 10.2571 | 1.51676 | 0.600996 | 1.51676 |
| Gbgt1         | NM_139197    | 0.00513  | 5.55809 | 4.73149 | 4.13067 | 1.51658 | 0.60082  | 1.51658 |
| Zfp335        | NM_199027    | 0.000445 | 10.6198 | 6.99532 | 6.39453 | 1.51655 | 0.60079  | 1.51655 |
| Cmas          | NM_009908    | 0.001276 | 8.07852 | 8.92624 | 8.3257  | 1.51628 | 0.600541 | 1.51628 |
| Cytip1        | NM_001164661 | 0.000955 | 8.71485 | 9.22248 | 8.62206 | 1.51616 | 0.600421 | 1.51616 |
| Abcf1         | NM_013854    | 0.003905 | 5.99073 | 8.99615 | 8.39583 | 1.51606 | 0.600325 | 1.51606 |
| Psmc5         | NM_008950    | 0.004089 | 5.91554 | 9.85821 | 9.25843 | 1.51548 | 0.599779 | 1.51548 |
| Cox8a         | NM_007750    | 0.0011   | 8.39831 | 10.0698 | 9.47009 | 1.51538 | 0.599676 | 1.51538 |
|               | ---          | 0.0009   | 8.84907 | 5.28151 | 4.68191 | 1.5153  | 0.5996   | 1.5153  |

|               |                   |          |         |         |         |         |          |         |
|---------------|-------------------|----------|---------|---------|---------|---------|----------|---------|
| Cideb         | NM_009894         | 0.002801 | 6.5552  | 5.43207 | 4.83267 | 1.51509 | 0.599403 | 1.51509 |
| Palm          | NM_023128         | 0.006777 | 5.14306 | 7.59382 | 6.99449 | 1.51501 | 0.59933  | 1.51501 |
| 4632404H12Rik | ENSMUST0000003845 |          |         |         |         |         |          |         |
|               | 0                 | 0.001515 | 7.72112 | 5.40195 | 4.80263 | 1.515   | 0.599318 | 1.515   |
|               | ---               | 0.000361 | 11.208  | 9.44349 | 8.84554 | 1.51356 | 0.597943 | 1.51356 |
| Kdm2a         | NM_001001984      | 0.000169 | 13.5981 | 8.95946 | 8.36153 | 1.51354 | 0.597923 | 1.51354 |
| Lmln          | NM_172823         | 6.27E-05 | 17.4904 | 5.62355 | 5.02593 | 1.51322 | 0.597619 | 1.51322 |
|               | ---               | 0.000687 | 9.49262 | 11.8381 | 11.2406 | 1.5131  | 0.597506 | 1.5131  |
| Dstyk         | NM_172516         | 0.001371 | 7.9271  | 8.62193 | 8.02508 | 1.51241 | 0.59685  | 1.51241 |
| Anln          | NM_028390         | 0.000499 | 10.312  | 5.1433  | 4.54656 | 1.5123  | 0.596741 | 1.5123  |
| Nudt13        | NM_026341         | 0.000491 | 10.3536 | 7.63165 | 7.03493 | 1.51227 | 0.596715 | 1.51227 |
| Eif2c2        | NM_153178         | 0.000545 | 10.0815 | 8.37805 | 7.78186 | 1.51172 | 0.596193 | 1.51172 |
| Tuba1b        | NM_011654         | 0.006583 | 5.18512 | 12.237  | 11.6409 | 1.51162 | 0.596098 | 1.51162 |
| Ttc27         | NM_152817         | 0.001857 | 7.31573 | 8.12861 | 7.53319 | 1.51091 | 0.595415 | 1.51091 |
| Ccl17         | NM_011332         | 0.000172 | 13.5389 | 5.19051 | 4.59569 | 1.51028 | 0.59482  | 1.51028 |
| Atp11a        | NM_015804         | 0.001308 | 8.02604 | 8.73489 | 8.14034 | 1.51    | 0.59455  | 1.51    |
| Osbpl9        | NM_133885         | 0.001032 | 8.53912 | 9.72445 | 9.13001 | 1.50989 | 0.594443 | 1.50989 |
|               | ---               | 0.000259 | 12.1955 | 8.23311 | 7.63868 | 1.50988 | 0.59443  | 1.50988 |
| Otud4         | NM_001081164      | 0.005088 | 5.57073 | 9.22752 | 8.63326 | 1.5097  | 0.594267 | 1.5097  |
| 5730455P16Rik | NM_027472         | 0.00263  | 6.66686 | 8.37592 | 7.78242 | 1.50891 | 0.593503 | 1.50891 |
| Atrn          | NM_009730         | 0.001084 | 8.43028 | 8.29751 | 7.70449 | 1.5084  | 0.593017 | 1.5084  |
| Prcc          | NM_033573         | 0.001525 | 7.70724 | 8.61778 | 8.02483 | 1.50833 | 0.592955 | 1.50833 |
|               | ---               | 0.000672 | 9.54683 | 10.6578 | 10.0651 | 1.50803 | 0.592663 | 1.50803 |
| Phkb          | NM_199446         | 0.002095 | 7.08491 | 9.0497  | 8.45726 | 1.5078  | 0.592441 | 1.5078  |
| Bat1a         | NM_019693         | 0.005555 | 5.43681 | 10.0437 | 9.45142 | 1.50766 | 0.592313 | 1.50766 |
| Lars2         | NM_153168         | 0.002245 | 6.95596 | 7.29929 | 6.70705 | 1.50758 | 0.592239 | 1.50758 |
| Mrpl51        | NM_025595         | 0.002665 | 6.64307 | 9.37049 | 8.7783  | 1.50753 | 0.592186 | 1.50753 |
| Upf1          | NM_001122829      | 0.000756 | 9.26152 | 8.36412 | 7.77236 | 1.50709 | 0.591762 | 1.50709 |
| Sfmbt2        | NM_177386         | 0.007005 | 5.09535 | 5.06876 | 4.4776  | 1.50646 | 0.591163 | 1.50646 |
| Bbx           | NM_027444         | 0.006326 | 5.24333 | 7.96178 | 7.37106 | 1.506   | 0.590719 | 1.506   |
| Ppip5k2       | NM_173760         | 0.005049 | 5.58239 | 8.41561 | 7.82502 | 1.50586 | 0.590592 | 1.50586 |



|               |              |          |         |         |         |         |          |         |
|---------------|--------------|----------|---------|---------|---------|---------|----------|---------|
| Mat2a         | NM_145569    | 0.00021  | 12.8775 | 11.3805 | 10.7901 | 1.50571 | 0.590441 | 1.50571 |
|               | ---          | 0.001134 | 8.33111 | 7.4808  | 6.89094 | 1.50511 | 0.589869 | 1.50511 |
| Eml6          | NM_146016    | 4.18E-05 | 19.3744 | 6.24501 | 5.65546 | 1.50478 | 0.58955  | 1.50478 |
| Dot1l         | NM_199322    | 0.003472 | 6.18511 | 6.96773 | 6.37823 | 1.50472 | 0.589499 | 1.50472 |
| Calcoco2      | NM_029755    | 0.003318 | 6.2618  | 4.74658 | 4.15722 | 1.50457 | 0.589354 | 1.50457 |
| Tubb2b        | NM_023716    | 0.003548 | 6.14923 | 6.9356  | 6.34648 | 1.50432 | 0.589113 | 1.50432 |
|               | ---          | 0.002491 | 6.76513 | 8.4092  | 7.82025 | 1.50415 | 0.58895  | 1.50415 |
|               | ---          | 0.004153 | 5.89052 | 7.76295 | 7.17402 | 1.50414 | 0.588935 | 1.50414 |
| Leng8         | NM_172736    | 0.000355 | 11.2524 | 8.08733 | 7.49862 | 1.5039  | 0.588712 | 1.5039  |
| Pck2          | NM_028994    | 0.00655  | 5.19252 | 8.63178 | 8.04334 | 1.50362 | 0.588441 | 1.50362 |
|               | ---          | 0.002653 | 6.65134 | 11.5159 | 10.9275 | 1.50355 | 0.588374 | 1.50355 |
| C030016D13Rik | NR_027987    | 0.004093 | 5.91422 | 4.41424 | 3.82718 | 1.50218 | 0.587058 | 1.50218 |
| Gnaq          | NM_008139    | 6.20E-05 | 17.5409 | 8.82298 | 8.23618 | 1.50192 | 0.586804 | 1.50192 |
| Taco1         | NM_027346    | 0.001249 | 8.12332 | 7.44594 | 6.85929 | 1.50176 | 0.58665  | 1.50176 |
|               | ---          | 0.00642  | 5.2216  | 10.1395 | 9.55365 | 1.50095 | 0.585878 | 1.50095 |
| Mtfr1         | NM_026182    | 0.003162 | 6.34394 | 8.32474 | 7.73891 | 1.5009  | 0.585828 | 1.5009  |
| Zbed4         | NM_181412    | 0.001483 | 7.76514 | 6.58934 | 6.00356 | 1.50085 | 0.585784 | 1.50085 |
| Hlrf          | NM_009210    | 0.002122 | 7.06105 | 7.92995 | 7.34477 | 1.50023 | 0.585181 | 1.50023 |
| 2310039H08Rik | NM_025966    | 0.002177 | 7.01323 | 7.95169 | 7.36694 | 1.49977 | 0.584744 | 1.49977 |
| Spna2         | NM_001076554 | 0.000777 | 9.19626 | 10.2202 | 9.63579 | 1.49941 | 0.584399 | 1.49941 |
| Btbd10        | NM_133700    | 0.006968 | 5.10306 | 7.37373 | 6.7903  | 1.49841 | 0.583434 | 1.49841 |
| Cenpj         | NM_001014996 | 0.003001 | 6.43403 | 6.22711 | 5.64423 | 1.49783 | 0.582872 | 1.49783 |
| Fblim1        | NM_133754    | 0.004966 | 5.60824 | 6.78647 | 6.2043  | 1.49709 | 0.58216  | 1.49709 |
| Wwp2          | NM_025830    | 0.00279  | 6.56203 | 7.71464 | 7.13316 | 1.49638 | 0.581477 | 1.49638 |
| Shkbp1        | NM_138676    | 0.001669 | 7.52631 | 7.04613 | 6.46489 | 1.49614 | 0.581243 | 1.49614 |
| Glrp1         | NM_008132    | 0.000998 | 8.61495 | 4.71913 | 4.13807 | 1.49595 | 0.581059 | 1.49595 |
| Tmem188       | NM_029074    | 0.000264 | 12.1369 | 9.28382 | 8.70365 | 1.49503 | 0.580173 | 1.49503 |
| Atp6v0c       | NM_009729    | 0.002043 | 7.13274 | 11.1684 | 10.5885 | 1.49477 | 0.579928 | 1.49477 |
| Psm3          | NM_009439    | 0.000352 | 11.2784 | 8.48951 | 7.90962 | 1.49474 | 0.579895 | 1.49474 |
| Phrf1         | NM_001081118 | 0.001531 | 7.69987 | 8.26048 | 7.6807  | 1.49462 | 0.579775 | 1.49462 |
|               | ---          | 0.001804 | 7.37267 | 4.66384 | 4.08414 | 1.49454 | 0.579698 | 1.49454 |

|               |                                |          |         |         |         |         |          |         |
|---------------|--------------------------------|----------|---------|---------|---------|---------|----------|---------|
| Ccdc47        | NM_026009                      | 9.30E-05 | 15.8339 | 10.028  | 9.44858 | 1.49423 | 0.579403 | 1.49423 |
| Riok2         | NM_025934                      | 0.003378 | 6.23155 | 9.09922 | 8.52003 | 1.49401 | 0.579193 | 1.49401 |
| N4bp2l2       | NM_201369<br>ENSMUST0000003708 | 0.001656 | 7.54123 | 8.27275 | 7.69397 | 1.49359 | 0.578782 | 1.49359 |
| Fer1l6        | 6                              | 0.003282 | 6.2802  | 4.54273 | 3.96446 | 1.49305 | 0.578265 | 1.49305 |
| Brsk1         | NM_001003920                   | 0.002169 | 7.01998 | 7.33751 | 6.75961 | 1.49267 | 0.577899 | 1.49267 |
| Trim24        | NM_145076                      | 0.001053 | 8.49407 | 7.88253 | 7.30479 | 1.4925  | 0.577734 | 1.4925  |
| Ube3a         | NM_011668                      | 0.00564  | 5.41383 | 8.9763  | 8.39917 | 1.49188 | 0.577128 | 1.49188 |
| Arl2          | NM_019722                      | 0.00558  | 5.4299  | 9.35721 | 8.78017 | 1.49178 | 0.577037 | 1.49178 |
| Mars          | NM_001171582                   | 0.003225 | 6.31052 | 9.54184 | 8.96567 | 1.49089 | 0.576178 | 1.49089 |
| Cpsf7         | NM_172302                      | 0.000412 | 10.8301 | 7.75646 | 7.18065 | 1.49051 | 0.575803 | 1.49051 |
|               | ---                            | 0.000359 | 11.2228 | 12.7235 | 12.1483 | 1.48988 | 0.575192 | 1.48988 |
| D030016E14Rik | NM_177240                      | 0.004249 | 5.85386 | 8.20078 | 7.62567 | 1.48979 | 0.57511  | 1.48979 |
| Med30         | NM_027212                      | 0.001051 | 8.50013 | 6.59895 | 6.02401 | 1.48961 | 0.574937 | 1.48961 |
| Phb           | NM_008831                      | 9.83E-05 | 15.6122 | 9.96679 | 9.39233 | 1.48912 | 0.574459 | 1.48912 |
| Pnpt1         | NM_027869                      | 0.003202 | 6.32239 | 8.85049 | 8.27608 | 1.48908 | 0.574417 | 1.48908 |
| Hdgfrp2       | NM_008233                      | 0.002999 | 6.43524 | 7.89153 | 7.31745 | 1.48873 | 0.57408  | 1.48873 |
| Tns4          | NM_172564                      | 0.00211  | 7.07128 | 5.50875 | 4.93469 | 1.48871 | 0.57406  | 1.48871 |
| Cpsf6         | NM_001013391                   | 0.002979 | 6.44693 | 8.54123 | 7.9675  | 1.48836 | 0.573724 | 1.48836 |
| Nipsnap1      | NM_008698                      | 0.000902 | 8.84446 | 7.2837  | 6.71017 | 1.48816 | 0.573525 | 1.48816 |
| Ccdc66        | NM_177111                      | 0.006645 | 5.17145 | 7.04588 | 6.47325 | 1.48724 | 0.572633 | 1.48724 |
| Slc35f3       | NM_175434                      | 1.84E-05 | 23.815  | 5.58099 | 5.00883 | 1.48675 | 0.572162 | 1.48675 |
| Npepps        | NM_008942                      | 0.00018  | 13.379  | 9.68561 | 9.11471 | 1.48545 | 0.570899 | 1.48545 |
| Al846148      | NM_001033139                   | 0.006826 | 5.13271 | 6.6943  | 6.12365 | 1.4852  | 0.570655 | 1.4852  |
| Tpst2         | NM_009419                      | 0.002713 | 6.61148 | 8.18776 | 7.61795 | 1.48433 | 0.569812 | 1.48433 |
| Ccdc123       | NM_028120                      | 0.003291 | 6.27571 | 6.4246  | 5.85486 | 1.48425 | 0.569735 | 1.48425 |
| Zfp84         | NM_023750                      | 0.001427 | 7.84361 | 7.55746 | 6.98787 | 1.48411 | 0.569598 | 1.48411 |
|               | ---                            | 0.002041 | 7.13484 | 9.50385 | 8.93439 | 1.48397 | 0.569462 | 1.48397 |
| Fam199x       | NM_146261                      | 0.005167 | 5.54685 | 6.70045 | 6.13172 | 1.48322 | 0.568729 | 1.48322 |
| Gemin6        | NM_026053                      | 0.002553 | 6.72011 | 7.06514 | 6.49653 | 1.4831  | 0.568612 | 1.4831  |
| Gin1          | NM_026250                      | 0.006645 | 5.1715  | 6.28762 | 5.71922 | 1.48288 | 0.568399 | 1.48288 |

|               |                   |          |         |         |         |         |          |         |
|---------------|-------------------|----------|---------|---------|---------|---------|----------|---------|
| Cltc          | NM_001003908      | 0.001878 | 7.29381 | 11.572  | 11.0045 | 1.48198 | 0.567523 | 1.48198 |
| Zfp68         | NM_013844         | 0.005685 | 5.40199 | 8.809   | 8.24149 | 1.48195 | 0.567501 | 1.48195 |
|               | ---               | 0.000991 | 8.63051 | 10.3873 | 9.81979 | 1.48192 | 0.567466 | 1.48192 |
| Htt           | NM_010414         | 0.001109 | 8.37979 | 7.3195  | 6.75207 | 1.48188 | 0.567429 | 1.48188 |
| Ints3         | NM_145540         | 0.000459 | 10.5349 | 8.47822 | 7.91131 | 1.48134 | 0.566907 | 1.48134 |
|               | ---               | 0.002365 | 6.85978 | 7.15262 | 6.58572 | 1.48134 | 0.566901 | 1.48134 |
| Ergic1        | NM_026170         | 0.003899 | 5.99322 | 10.2993 | 9.73247 | 1.48122 | 0.566789 | 1.48122 |
| Nudcd3        | NM_173748         | 0.004156 | 5.88925 | 8.69171 | 8.12501 | 1.48114 | 0.566704 | 1.48114 |
|               | ---               | 0.001437 | 7.82952 | 9.59834 | 9.0321  | 1.48065 | 0.566231 | 1.48065 |
|               | ---               | 0.004965 | 5.60857 | 10.1003 | 9.53418 | 1.48056 | 0.56614  | 1.48056 |
| Cwc25         | NM_026186         | 0.002724 | 6.60454 | 6.87198 | 6.30592 | 1.48047 | 0.566058 | 1.48047 |
| Pdcd11        | NM_011053         | 0.001353 | 7.95506 | 8.43815 | 7.87233 | 1.48023 | 0.565818 | 1.48023 |
| Pam           | NM_013626         | 0.003117 | 6.36868 | 10.307  | 9.74136 | 1.48006 | 0.565659 | 1.48006 |
|               | ENSMUST0000009789 |          |         |         |         |         |          |         |
| Gm10572       | 4                 | 0.000267 | 12.1046 | 5.50645 | 4.94174 | 1.47909 | 0.564709 | 1.47909 |
| Otud1         | NM_027715         | 0.000529 | 10.1568 | 5.98667 | 5.4227  | 1.47834 | 0.563975 | 1.47834 |
| Plxna1        | NM_008881         | 0.002234 | 6.96492 | 8.99776 | 8.43411 | 1.47801 | 0.563652 | 1.47801 |
| Rbm15         | NM_001045807      | 0.005414 | 5.47558 | 7.67351 | 7.10999 | 1.47788 | 0.563525 | 1.47788 |
| Bptf          | NM_176850         | 0.004221 | 5.86458 | 7.91362 | 7.35099 | 1.47695 | 0.562623 | 1.47695 |
| Ube2k         | NM_016786         | 2.40E-05 | 22.2811 | 9.7739  | 9.21206 | 1.47614 | 0.561833 | 1.47614 |
| Dpp9          | NM_172624         | 0.002141 | 7.0439  | 7.93545 | 7.37378 | 1.47599 | 0.561678 | 1.47599 |
| Trp53inp2     | NM_178111         | 0.000745 | 9.29625 | 7.57149 | 7.01004 | 1.47575 | 0.561446 | 1.47575 |
| Ap1b1         | NM_007454         | 0.000459 | 10.5361 | 9.26563 | 8.70459 | 1.47533 | 0.561039 | 1.47533 |
| 4632411B12Rik | BC132293          | 0.000423 | 10.7584 | 8.53029 | 7.96953 | 1.47505 | 0.56076  | 1.47505 |
|               | ---               | 0.004076 | 5.92088 | 8.80994 | 8.25001 | 1.47421 | 0.559937 | 1.47421 |
| Rprd1b        | NM_027434         | 6.07E-05 | 17.6379 | 7.85121 | 7.29154 | 1.47394 | 0.559673 | 1.47394 |
| Trmt1         | NM_198020         | 0.000883 | 8.89516 | 9.0466  | 8.48711 | 1.47375 | 0.559487 | 1.47375 |
|               | ---               | 0.005087 | 5.57083 | 10.5871 | 10.0281 | 1.47324 | 0.55899  | 1.47324 |
| Eif1          | NM_011508         | 0.0039   | 5.99249 | 11.6535 | 11.0947 | 1.47305 | 0.558803 | 1.47305 |
| Srpk1         | NM_016795         | 0.002267 | 6.93739 | 9.33679 | 8.77812 | 1.47292 | 0.558676 | 1.47292 |
| Ddb1          | NM_015735         | 0.001904 | 7.26809 | 11.6391 | 11.0808 | 1.47253 | 0.558295 | 1.47253 |

|               | ENSMUST0000009811 |          |         |         |         |         |          |         |
|---------------|-------------------|----------|---------|---------|---------|---------|----------|---------|
| AA474408      | 0                 | 0.004066 | 5.92466 | 6.20237 | 5.64426 | 1.47233 | 0.5581   | 1.47233 |
| Raf1          | NM_029780         | 0.000905 | 8.83656 | 10.1478 | 9.58967 | 1.47232 | 0.55809  | 1.47232 |
| Hps1          | NM_019424         | 0.00017  | 13.5801 | 7.37249 | 6.81459 | 1.47212 | 0.557898 | 1.47212 |
| Nsmce4a       | NM_001162855      | 0.003303 | 6.26942 | 8.33811 | 7.78025 | 1.47208 | 0.557858 | 1.47208 |
| Ube3c         | NM_133907         | 0.002614 | 6.67777 | 9.4869  | 8.92929 | 1.47184 | 0.557617 | 1.47184 |
| Scn3a         | NM_018732         | 0.003078 | 6.39056 | 4.98765 | 4.43046 | 1.4714  | 0.557194 | 1.4714  |
|               | ---               | 0.002585 | 6.69791 | 9.87906 | 9.3233  | 1.46995 | 0.555766 | 1.46995 |
| Noc3l         | NM_021315         | 0.00134  | 7.97395 | 8.57924 | 8.02358 | 1.46984 | 0.55566  | 1.46984 |
| Gga3          | NM_173048         | 0.001526 | 7.70612 | 7.14987 | 6.59454 | 1.46951 | 0.555331 | 1.46951 |
| Ppia          | NM_008907         | 0.001133 | 8.33313 | 12.4942 | 11.9392 | 1.46923 | 0.555062 | 1.46923 |
| Klf8          | NM_173780         | 0.002604 | 6.68461 | 4.54618 | 3.99114 | 1.4692  | 0.555036 | 1.4692  |
| Sympk         | NM_026605         | 0.000603 | 9.82016 | 9.02848 | 8.47363 | 1.46902 | 0.55485  | 1.46902 |
| 1300010F03Rik | NM_027906         | 0.005898 | 5.34695 | 7.8055  | 7.2511  | 1.46856 | 0.554402 | 1.46856 |
| Atp6v0c       | NM_009729         | 0.003794 | 6.03797 | 11.3327 | 10.7783 | 1.46852 | 0.55436  | 1.46852 |
| Atf7          | NM_146065         | 0.00095  | 8.72542 | 9.53204 | 8.97784 | 1.46836 | 0.554207 | 1.46836 |
| Rab11fip3     | NM_001162869      | 0.002271 | 6.93455 | 7.21387 | 6.66024 | 1.46778 | 0.553634 | 1.46778 |
| Cstad         | NM_030137         | 0.004562 | 5.74084 | 5.04773 | 4.49507 | 1.46679 | 0.552666 | 1.46679 |
| Ccdc101       | NM_029339         | 0.00509  | 5.57018 | 7.16685 | 6.61504 | 1.46592 | 0.551809 | 1.46592 |
| 0610038B21Rik | NR_028125         | 0.001277 | 8.07656 | 5.75995 | 5.20821 | 1.46585 | 0.551741 | 1.46585 |
| Apoa1bp       | NM_144897         | 0.005399 | 5.47994 | 8.99761 | 8.44616 | 1.46556 | 0.55145  | 1.46556 |
| Usp39         | NM_138592         | 0.004843 | 5.64697 | 9.22989 | 8.67868 | 1.46532 | 0.551213 | 1.46532 |
| H3f3b         | NM_008211         | 3.74E-05 | 19.9312 | 11.4787 | 10.9277 | 1.46513 | 0.551026 | 1.46513 |
| Cstf3         | NM_145529         | 0.004055 | 5.92936 | 7.15029 | 6.59936 | 1.46503 | 0.55093  | 1.46503 |
| Pigo          | NM_020035         | 8.28E-05 | 16.3041 | 6.762   | 6.212   | 1.46409 | 0.55     | 1.46409 |
| Hist1h2be     | NM_001177653      | 0.00143  | 7.83932 | 6.51067 | 5.96071 | 1.46404 | 0.549953 | 1.46404 |
| Top3a         | NM_009410         | 0.003625 | 6.11326 | 7.15317 | 6.60337 | 1.46388 | 0.549802 | 1.46388 |
| Eif4ebp1      | NM_007918         | 0.00196  | 7.21211 | 9.12664 | 8.57686 | 1.46386 | 0.549779 | 1.46386 |
| Bub3          | NM_009774         | 0.001457 | 7.80027 | 10.0608 | 9.5112  | 1.46367 | 0.54959  | 1.46367 |
| Jmjd6         | NM_033398         | 0.0035   | 6.17177 | 7.98027 | 7.43095 | 1.4634  | 0.549326 | 1.4634  |
|               | ---               | 0.002089 | 7.09023 | 5.43484 | 4.88552 | 1.4634  | 0.54932  | 1.4634  |

|               |              |          |         |         |         |         |          |         |
|---------------|--------------|----------|---------|---------|---------|---------|----------|---------|
| Tmem184b      | NM_172608    | 0.004814 | 5.65633 | 9.18822 | 8.6391  | 1.46319 | 0.549121 | 1.46319 |
| Fam173a       | BC096050     | 0.0062   | 5.27282 | 8.55292 | 8.00421 | 1.46278 | 0.548715 | 1.46278 |
| Gm8995        | AK172683     | 0.004051 | 5.93065 | 4.34063 | 3.79219 | 1.4625  | 0.548439 | 1.4625  |
| Nudt22        | NM_026675    | 0.002907 | 6.48981 | 7.81272 | 7.26453 | 1.46225 | 0.548191 | 1.46225 |
| 2810046L04Rik | NM_173382    | 0.000494 | 10.3361 | 7.283   | 6.73507 | 1.46199 | 0.547933 | 1.46199 |
| Cstf1         | NM_024199    | 0.000398 | 10.9315 | 8.06925 | 7.52188 | 1.46142 | 0.547367 | 1.46142 |
|               | ---          | 0.000263 | 12.1584 | 12.0462 | 11.4989 | 1.46134 | 0.547292 | 1.46134 |
| Plekhm2       | NM_001033150 | 0.001596 | 7.61485 | 7.09466 | 6.54737 | 1.46133 | 0.547284 | 1.46133 |
| Nudt4         | NM_027722    | 5.52E-06 | 32.2348 | 10.969  | 10.4219 | 1.46115 | 0.547104 | 1.46115 |
| Gnaz          | NM_010311    | 0.004241 | 5.85691 | 5.27965 | 4.73282 | 1.46087 | 0.546828 | 1.46087 |
| Ikzf5         | NM_175115    | 0.005915 | 5.34265 | 8.74796 | 8.20127 | 1.46073 | 0.546692 | 1.46073 |
| Nsfl1c        | NM_198326    | 0.002466 | 6.78336 | 9.27844 | 8.73268 | 1.45979 | 0.545759 | 1.45979 |
| Vps18         | NM_172269    | 0.001873 | 7.29974 | 7.69847 | 7.15361 | 1.45888 | 0.544863 | 1.45888 |
| Mil2          | NM_001033276 | 0.001576 | 7.64105 | 6.71334 | 6.16877 | 1.45858 | 0.544568 | 1.45858 |
| Hps4          | NM_138646    | 0.00311  | 6.37282 | 7.56427 | 7.02003 | 1.45826 | 0.544248 | 1.45826 |
| Aplf          | NM_001170489 | 0.000196 | 13.1061 | 6.48998 | 5.94577 | 1.45822 | 0.544206 | 1.45822 |
| Etfdh         | NM_025794    | 0.004349 | 5.81669 | 9.65482 | 9.11102 | 1.45781 | 0.543801 | 1.45781 |
| Rbck1         | NM_019705    | 1.01E-05 | 27.7043 | 8.18851 | 7.64516 | 1.45735 | 0.543348 | 1.45735 |
| Cnm3          | NM_001039551 | 0.000388 | 10.9976 | 6.75493 | 6.2116  | 1.45734 | 0.543335 | 1.45734 |
| Lrrfip1       | NM_008515    | 0.002884 | 6.50338 | 7.20348 | 6.6608  | 1.45668 | 0.542683 | 1.45668 |
| Elk4          | NM_007923    | 0.002141 | 7.04439 | 7.5623  | 7.01967 | 1.45662 | 0.542628 | 1.45662 |
| Atp6v0a1      | NM_016920    | 0.000596 | 9.84836 | 8.45403 | 7.91148 | 1.45654 | 0.542546 | 1.45654 |
| Sart1         | NM_016882    | 0.004361 | 5.8123  | 7.76674 | 7.22428 | 1.45646 | 0.542467 | 1.45646 |
| Gpr172b       | NM_029643    | 0.001566 | 7.65384 | 7.09097 | 6.54872 | 1.45625 | 0.542255 | 1.45625 |
| Stk35         | NM_183262    | 0.001272 | 8.08525 | 8.02663 | 7.4846  | 1.45602 | 0.542033 | 1.45602 |
| Ndufa10       | NM_024197    | 0.000926 | 8.78443 | 9.85551 | 9.31388 | 1.45562 | 0.54163  | 1.45562 |
| Pcyt2         | NM_024229    | 0.006164 | 5.28159 | 7.39977 | 6.85833 | 1.45542 | 0.541434 | 1.45542 |
|               | ---          | 0.001871 | 7.30151 | 8.89896 | 8.35779 | 1.45514 | 0.541163 | 1.45514 |
| Pvr           | NM_027514    | 0.005676 | 5.40426 | 9.60174 | 9.06069 | 1.45503 | 0.541052 | 1.45503 |
| Chac2         | NM_026527    | 0.002248 | 6.95328 | 5.97668 | 5.43585 | 1.45482 | 0.540836 | 1.45482 |
| Pes1          | NM_022889    | 0.000546 | 10.0761 | 9.34038 | 8.7996  | 1.45476 | 0.540786 | 1.45476 |

|               |              |          |         |         |         |         |          |         |
|---------------|--------------|----------|---------|---------|---------|---------|----------|---------|
| Atp5g2        | NM_026468    | 0.001033 | 8.53671 | 10.6118 | 10.0713 | 1.45447 | 0.540495 | 1.45447 |
|               | ---          | 0.001664 | 7.53214 | 5.47147 | 4.93115 | 1.45429 | 0.540314 | 1.45429 |
|               | ---          | 0.005658 | 5.40914 | 6.53878 | 5.99889 | 1.45386 | 0.539884 | 1.45386 |
| Sap130        | NM_172965    | 0.006107 | 5.2952  | 7.98063 | 7.44088 | 1.45372 | 0.539752 | 1.45372 |
| Plac1         | NM_019538    | 0.004122 | 5.90281 | 4.36393 | 3.82477 | 1.45312 | 0.539158 | 1.45312 |
| Uqcrc2        | NM_025899    | 2.34E-05 | 22.4274 | 10.6184 | 10.0793 | 1.45307 | 0.539102 | 1.45307 |
| Eif5a2        | NM_177586    | 0.003692 | 6.08277 | 7.29805 | 6.75944 | 1.45257 | 0.538603 | 1.45257 |
| Fam120b       | NR_033586    | 0.006721 | 5.15496 | 7.55257 | 7.01424 | 1.45229 | 0.538326 | 1.45229 |
| Pld4          | NM_178911    | 0.005908 | 5.34423 | 4.51682 | 3.97977 | 1.451   | 0.53705  | 1.451   |
| Dmwd          | NM_010058    | 0.000692 | 9.47427 | 7.27504 | 6.73859 | 1.45041 | 0.536459 | 1.45041 |
| Itrip         | NM_001001738 | 0.006543 | 5.19398 | 6.2126  | 5.67618 | 1.45036 | 0.536413 | 1.45036 |
| Flii          | NM_022009    | 0.000718 | 9.38719 | 9.39349 | 8.85735 | 1.45008 | 0.536136 | 1.45008 |
| Casc3         | NM_138660    | 0.000347 | 11.3219 | 7.35133 | 6.81572 | 1.44955 | 0.535607 | 1.44955 |
| F630110N24Rik | BC119790     | 0.003288 | 6.27707 | 7.10006 | 6.56462 | 1.44939 | 0.535444 | 1.44939 |
| Tars2         | NM_027931    | 0.002606 | 6.6831  | 8.01157 | 7.47711 | 1.4484  | 0.534459 | 1.4484  |
| Timm22        | NM_019818    | 0.005297 | 5.50882 | 7.55194 | 7.01794 | 1.44794 | 0.534002 | 1.44794 |
| Aldoa         | NM_001177307 | 0.003208 | 6.31907 | 12.1066 | 11.5726 | 1.44792 | 0.533982 | 1.44792 |
| Psmc4         | NM_011874    | 0.002684 | 6.63065 | 9.08221 | 8.549   | 1.44715 | 0.533212 | 1.44715 |
| Dcaf13        | NM_198606    | 0.00053  | 10.1512 | 9.27558 | 8.74241 | 1.44711 | 0.533177 | 1.44711 |
| Timm50        | NM_025616    | 0.002104 | 7.07693 | 7.67742 | 7.14465 | 1.44671 | 0.532775 | 1.44671 |
| Acox1         | NM_015729    | 0.003053 | 6.40438 | 9.49988 | 8.96726 | 1.44655 | 0.532614 | 1.44655 |
|               | ---          | 0.000245 | 12.3788 | 9.65279 | 9.1203  | 1.44643 | 0.532496 | 1.44643 |
| Mvk           | NM_023556    | 0.000291 | 11.8473 | 7.02837 | 6.49616 | 1.44614 | 0.532206 | 1.44614 |
|               | ---          | 0.001832 | 7.34286 | 9.29976 | 8.76763 | 1.44606 | 0.53213  | 1.44606 |
| Ddx54         | NM_028041    | 0.001144 | 8.31176 | 8.36377 | 7.83193 | 1.44577 | 0.531842 | 1.44577 |
| Adar          | NM_001038587 | 0.000993 | 8.62509 | 7.71017 | 7.1786  | 1.4455  | 0.531569 | 1.4455  |
| Slc25a26      | NM_026255    | 0.005459 | 5.46299 | 7.26956 | 6.73807 | 1.44542 | 0.531489 | 1.44542 |
| Smpd1         | NM_011421    | 0.002124 | 7.05953 | 9.48297 | 8.95154 | 1.44536 | 0.531432 | 1.44536 |
| Cep152        | NM_001081091 | 0.004459 | 5.77703 | 5.63585 | 5.10445 | 1.44533 | 0.531401 | 1.44533 |
| Rnf139        | NM_175226    | 0.000691 | 9.47981 | 8.74354 | 8.21251 | 1.44496 | 0.53103  | 1.44496 |
| Mast3         | NM_199308    | 0.000733 | 9.33539 | 6.76927 | 6.23839 | 1.44481 | 0.53088  | 1.44481 |

|               |              |          |         |         |         |         |          |         |
|---------------|--------------|----------|---------|---------|---------|---------|----------|---------|
| 9130401M01Rik | BC050895     | 0.003766 | 6.04991 | 8.12003 | 7.58918 | 1.44478 | 0.530854 | 1.44478 |
| Fam40a        | NM_153563    | 0.002702 | 6.6189  | 8.30223 | 7.77176 | 1.4444  | 0.530467 | 1.4444  |
| Calcb         | NM_054084    | 0.001281 | 8.07018 | 5.0202  | 4.48993 | 1.4442  | 0.530271 | 1.4442  |
| Trove2        | NM_013835    | 0.004531 | 5.75153 | 8.76887 | 8.23869 | 1.44411 | 0.530178 | 1.44411 |
| Gzf1          | NM_028986    | 0.003265 | 6.28941 | 8.11241 | 7.58225 | 1.44409 | 0.530164 | 1.44409 |
| Arfgef1       | NM_001102430 | 0.001568 | 7.65076 | 8.95967 | 8.42957 | 1.44403 | 0.530097 | 1.44403 |
| Ciao1         | NM_025296    | 0.006537 | 5.19529 | 8.72713 | 8.19735 | 1.44371 | 0.529782 | 1.44371 |
| Pigg          | NM_001081234 | 0.000317 | 11.5877 | 8.02531 | 7.49556 | 1.44368 | 0.529754 | 1.44368 |
| Ogfod1        | NM_177767    | 0.000715 | 9.39675 | 8.00063 | 7.47094 | 1.44362 | 0.52969  | 1.44362 |
| Usp15         | NM_027604    | 0.0022   | 6.99332 | 8.88132 | 8.35175 | 1.4435  | 0.529571 | 1.4435  |
| Poll          | NM_020032    | 0.003242 | 6.30107 | 5.99589 | 5.46634 | 1.44348 | 0.529554 | 1.44348 |
| Farsa         | NM_025648    | 0.00021  | 12.8743 | 8.01498 | 7.48554 | 1.44337 | 0.529442 | 1.44337 |
| Dlg4          | NM_007864    | 0.001412 | 7.8661  | 8.31732 | 7.78838 | 1.44286 | 0.528936 | 1.44286 |
| Kirrel3       | NM_001190911 | 0.000126 | 14.649  | 5.41291 | 4.88411 | 1.44274 | 0.528808 | 1.44274 |
| Mrps23        | NM_024174    | 0.001126 | 8.3471  | 8.80211 | 8.27357 | 1.44247 | 0.528541 | 1.44247 |
| Tbc1d22b      | NM_198647    | 0.002751 | 6.58698 | 6.69444 | 6.16607 | 1.44229 | 0.528363 | 1.44229 |
| Mll2          | NM_001033276 | 0.006145 | 5.28591 | 7.23433 | 6.70637 | 1.44189 | 0.52796  | 1.44189 |
| Galk1         | NM_016905    | 0.000257 | 12.2252 | 7.8488  | 7.32146 | 1.44127 | 0.527336 | 1.44127 |
| Depdc5        | NM_001025426 | 0.000295 | 11.8066 | 6.91468 | 6.38803 | 1.44058 | 0.526648 | 1.44058 |
| Gipc1         | NM_018771    | 0.000818 | 9.07388 | 8.42789 | 7.90125 | 1.44058 | 0.526645 | 1.44058 |
| Fbxo7         | NM_153195    | 0.003451 | 6.19537 | 7.83633 | 7.31015 | 1.44011 | 0.526182 | 1.44011 |
| Ubr5          | NM_001081359 | 0.003464 | 6.18916 | 9.92085 | 9.39476 | 1.44002 | 0.526093 | 1.44002 |
| Eny2          | NM_175009    | 0.004467 | 5.7741  | 9.51403 | 8.98839 | 1.43957 | 0.52564  | 1.43957 |
| Csrp2bp       | NM_181417    | 0.001639 | 7.5626  | 8.0421  | 7.51659 | 1.43943 | 0.525502 | 1.43943 |
| Wdr43         | NM_175639    | 0.006404 | 5.22528 | 9.74221 | 9.21694 | 1.4392  | 0.52527  | 1.4392  |
| Ppargc1a      | NR_027710    | 0.003238 | 6.30319 | 4.79276 | 4.26755 | 1.43915 | 0.525219 | 1.43915 |
| Bicd2         | NM_001039179 | 0.001603 | 7.60665 | 7.64139 | 7.1164  | 1.43892 | 0.52499  | 1.43892 |
| Mrpl44        | NM_001081210 | 0.006134 | 5.28864 | 7.03688 | 6.5123  | 1.43851 | 0.52458  | 1.43851 |
| Tmem57        | NM_025382    | 0.0007   | 9.44664 | 8.38205 | 7.85752 | 1.43846 | 0.524525 | 1.43846 |
| Cct6a         | NM_009838    | 0.006255 | 5.25993 | 10.1196 | 9.5952  | 1.43834 | 0.524406 | 1.43834 |
| Gclm          | NM_008129    | 0.004468 | 5.77354 | 8.94054 | 8.41636 | 1.43812 | 0.524186 | 1.43812 |

|          |              |          |         |         |         |         |          |         |
|----------|--------------|----------|---------|---------|---------|---------|----------|---------|
| Luc7l    | NM_028190    | 0.004743 | 5.67979 | 8.62132 | 8.09768 | 1.43758 | 0.523641 | 1.43758 |
| Rnps1    | NM_009070    | 0.003328 | 6.25686 | 9.36032 | 8.83682 | 1.43745 | 0.523507 | 1.43745 |
| Atf7ip   | NM_019426    | 0.000638 | 9.6761  | 9.64686 | 9.12367 | 1.43712 | 0.523183 | 1.43712 |
| Ndufv1   | NM_133666    | 0.000866 | 8.93844 | 9.57453 | 9.05156 | 1.43692 | 0.522976 | 1.43692 |
|          | ---          | 0.000548 | 10.0651 | 12.3648 | 11.8418 | 1.43689 | 0.522951 | 1.43689 |
| Atf3     | NM_146091    | 0.000258 | 12.2155 | 10.5439 | 10.0216 | 1.43629 | 0.522349 | 1.43629 |
|          | ---          | 0.004547 | 5.74583 | 10.1798 | 9.65752 | 1.43619 | 0.522243 | 1.43619 |
|          | ---          | 0.004899 | 5.62922 | 9.81908 | 9.2969  | 1.43613 | 0.522182 | 1.43613 |
| Foxp4    | NM_001110824 | 0.001466 | 7.78816 | 6.88167 | 6.36013 | 1.43548 | 0.521538 | 1.43548 |
|          | ---          | 0.000163 | 13.7295 | 12.1332 | 11.6118 | 1.43534 | 0.521388 | 1.43534 |
| Mrps5    | NM_029963    | 0.002103 | 7.07836 | 7.46072 | 6.9402  | 1.43447 | 0.520522 | 1.43447 |
| Wdr81    | NM_138950    | 0.003292 | 6.27516 | 7.4899  | 6.97097 | 1.43289 | 0.518933 | 1.43289 |
| Wdtdc1   | NM_199306    | 0.002983 | 6.44462 | 7.16432 | 6.64568 | 1.43261 | 0.518646 | 1.43261 |
|          | ---          | 0.003052 | 6.40495 | 11.6101 | 11.0916 | 1.43252 | 0.518551 | 1.43252 |
| Ppp1r13l | NM_001010836 | 0.004883 | 5.63443 | 6.26233 | 5.7441  | 1.4322  | 0.518231 | 1.4322  |
| Unk      | NM_172569    | 0.000607 | 9.80308 | 7.31978 | 6.80158 | 1.43216 | 0.518195 | 1.43216 |
| Casp8    | NM_009812    | 0.002264 | 6.93979 | 8.76309 | 8.24515 | 1.43191 | 0.517942 | 1.43191 |
| Tmem85   | NM_026519    | 0.003887 | 5.99799 | 9.8616  | 9.34377 | 1.43181 | 0.517837 | 1.43181 |
|          | ---          | 0.000672 | 9.54788 | 6.18045 | 5.66275 | 1.43167 | 0.517695 | 1.43167 |
| Ccdc13   | NM_028384    | 0.00547  | 5.45994 | 5.27895 | 4.76205 | 1.43088 | 0.516902 | 1.43088 |
| Tsku     | NM_001168541 | 0.000732 | 9.33802 | 7.36309 | 6.84651 | 1.43057 | 0.516586 | 1.43057 |
| H3f3b    | NM_008211    | 0.002447 | 6.79749 | 11.8308 | 11.3147 | 1.43008 | 0.516091 | 1.43008 |
| Xrcc1    | NM_009532    | 0.005396 | 5.4806  | 7.20207 | 6.68605 | 1.43    | 0.516013 | 1.43    |
|          | ---          | 0.007039 | 5.08854 | 3.33535 | 2.81943 | 1.42991 | 0.51592  | 1.42991 |
| Cisd1    | BC013522     | 0.002743 | 6.59183 | 5.98598 | 5.47137 | 1.42861 | 0.514611 | 1.42861 |
| Mafg     | NM_010756    | 0.002509 | 6.75146 | 8.42094 | 7.90646 | 1.42848 | 0.514481 | 1.42848 |
| Clptm1   | NM_019649    | 0.000525 | 10.1765 | 10.1902 | 9.6758  | 1.42838 | 0.514379 | 1.42838 |
| Klhl7    | NM_026448    | 0.005924 | 5.3402  | 8.75204 | 8.23829 | 1.42776 | 0.513751 | 1.42776 |
| Vmn2r43  | NM_198961    | 0.001003 | 8.60455 | 3.84029 | 3.32687 | 1.42743 | 0.513421 | 1.42743 |
| Smarcad1 | NM_007958    | 0.004771 | 5.67037 | 9.1253  | 8.61196 | 1.42735 | 0.51334  | 1.42735 |
|          | ---          | 0.00219  | 7.00214 | 9.49065 | 8.9778  | 1.42686 | 0.512848 | 1.42686 |



|               |              |          |         |         |         |         |          |         |
|---------------|--------------|----------|---------|---------|---------|---------|----------|---------|
| Pcdh10        | NM_001098171 | 0.001651 | 7.54753 | 4.67638 | 4.16357 | 1.42682 | 0.512806 | 1.42682 |
| Samm50        | NM_178614    | 0.001262 | 8.101   | 8.66375 | 8.15095 | 1.42682 | 0.512803 | 1.42682 |
| Tug1          | NR_002321    | 0.005058 | 5.57989 | 10.1268 | 9.61514 | 1.42572 | 0.511695 | 1.42572 |
| Ccdc97        | NM_028771    | 0.000335 | 11.4196 | 7.42374 | 6.9121  | 1.42567 | 0.51164  | 1.42567 |
| Tubgcp4       | NM_153387    | 0.003458 | 6.1922  | 7.99414 | 7.48256 | 1.42561 | 0.511576 | 1.42561 |
| Prmt6         | NM_178891    | 0.001714 | 7.47265 | 6.70654 | 6.19515 | 1.42542 | 0.511389 | 1.42542 |
| Mrgpre        | NM_175534    | 0.001442 | 7.82171 | 5.69266 | 5.1813  | 1.4254  | 0.511368 | 1.4254  |
|               | ---          | 0.002439 | 6.8033  | 9.73222 | 9.22086 | 1.42539 | 0.511354 | 1.42539 |
| Mrpl16        | NM_025606    | 0.004487 | 5.76695 | 7.70253 | 7.19168 | 1.42489 | 0.510852 | 1.42489 |
| Ipo11         | NM_029665    | 0.000812 | 9.0917  | 8.63049 | 8.11977 | 1.42476 | 0.510722 | 1.42476 |
| Msh6          | NM_010830    | 0.006347 | 5.23846 | 7.46296 | 6.95356 | 1.42347 | 0.509408 | 1.42347 |
|               | ---          | 0.003065 | 6.39797 | 9.16964 | 8.66025 | 1.42345 | 0.509392 | 1.42345 |
| Trappc9       | NM_180662    | 0.002155 | 7.03206 | 7.67991 | 7.17074 | 1.42322 | 0.509162 | 1.42322 |
| Sbno1         | NM_001081203 | 0.003147 | 6.35213 | 9.20276 | 8.69372 | 1.42311 | 0.509043 | 1.42311 |
| Eri1          | NM_026067    | 0.000514 | 10.2325 | 8.30344 | 7.79485 | 1.42266 | 0.508591 | 1.42266 |
| Pnpla6        | NM_001122818 | 0.002204 | 6.99011 | 7.8522  | 7.34394 | 1.42234 | 0.508264 | 1.42234 |
| Uba2          | NM_016682    | 0.002172 | 7.0169  | 9.50313 | 8.99546 | 1.42175 | 0.507667 | 1.42175 |
| 4933407H18Rik | NM_001081101 | 0.000107 | 15.2929 | 6.9268  | 6.41949 | 1.4214  | 0.507315 | 1.4214  |
| Eif3d         | NM_018749    | 0.005227 | 5.52919 | 9.95156 | 9.44432 | 1.42132 | 0.507234 | 1.42132 |
| Mlx           | NM_011550    | 0.004429 | 5.78776 | 8.42681 | 7.92005 | 1.42085 | 0.506752 | 1.42085 |
| Dnajc5        | NM_016775    | 0.00355  | 6.14825 | 8.8182  | 8.31151 | 1.42078 | 0.506687 | 1.42078 |
| Spats2        | NM_139140    | 0.000961 | 8.69901 | 9.10133 | 8.59471 | 1.42072 | 0.506618 | 1.42072 |
| Ankrd40       | NM_027799    | 0.002374 | 6.85218 | 8.61667 | 8.11009 | 1.42068 | 0.506585 | 1.42068 |
| Btbd2         | NM_145361    | 0.00052  | 10.201  | 8.03788 | 7.53178 | 1.4202  | 0.506095 | 1.4202  |
| Fastkd5       | NM_198176    | 0.002447 | 6.7972  | 6.96759 | 6.46167 | 1.42003 | 0.50592  | 1.42003 |
| Timm17a       | NM_011590    | 0.000978 | 8.66019 | 9.13579 | 8.62991 | 1.41998 | 0.505872 | 1.41998 |
| Snd1          | NM_019776    | 0.000692 | 9.47644 | 10.0898 | 9.58444 | 1.4195  | 0.50538  | 1.4195  |
| Spred1        | NM_033524    | 0.005232 | 5.52769 | 8.8059  | 8.30083 | 1.41919 | 0.505068 | 1.41919 |
| Ncbp1         | NM_001033201 | 0.003246 | 6.29901 | 8.76974 | 8.26477 | 1.41909 | 0.504967 | 1.41909 |
| Tmed4         | NM_134020    | 0.000923 | 8.79309 | 10.137  | 9.63214 | 1.41902 | 0.504896 | 1.41902 |
| Mrpl46        | NM_023331    | 0.005898 | 5.34687 | 6.7915  | 6.2868  | 1.41883 | 0.504706 | 1.41883 |

|          |              |          |         |         |         |         |          |         |
|----------|--------------|----------|---------|---------|---------|---------|----------|---------|
| Wdr70    | NM_001081402 | 0.000196 | 13.1    | 8.90549 | 8.40102 | 1.4186  | 0.504469 | 1.4186  |
| Mrpl49   | NM_026246    | 0.002587 | 6.69652 | 8.52968 | 8.02535 | 1.41846 | 0.504329 | 1.41846 |
| Crtc2    | NM_028881    | 0.000465 | 10.4984 | 7.80001 | 7.29591 | 1.41824 | 0.504105 | 1.41824 |
| Gpatch8  | NM_001159492 | 0.003631 | 6.11044 | 7.44835 | 6.94427 | 1.41822 | 0.50408  | 1.41822 |
| Olfr1392 | NM_146470    | 0.004263 | 5.84844 | 4.35552 | 3.85147 | 1.41819 | 0.504055 | 1.41819 |
| Akap8l   | NM_017476    | 0.003723 | 6.06887 | 8.14544 | 7.64203 | 1.41757 | 0.503418 | 1.41757 |
| Rnps1    | NM_009070    | 0.005729 | 5.39037 | 9.34856 | 8.84532 | 1.41739 | 0.503239 | 1.41739 |
| Polr1c   | NM_009085    | 0.00137  | 7.92831 | 9.0338  | 8.53064 | 1.41732 | 0.50316  | 1.41732 |
|          | ---          | 0.000555 | 10.0313 | 6.39095 | 5.88811 | 1.417   | 0.502836 | 1.417   |
| Urgcp    | NM_178623    | 0.003582 | 6.133   | 7.67185 | 7.16915 | 1.41686 | 0.502698 | 1.41686 |
| Fam193a  | BC099925     | 0.005624 | 5.4181  | 6.89404 | 6.39141 | 1.4168  | 0.502632 | 1.4168  |
| Rgl2     | NM_009059    | 0.000877 | 8.91093 | 7.69096 | 7.18864 | 1.41649 | 0.50232  | 1.41649 |
| Dpf2     | NM_011262    | 0.002447 | 6.79751 | 9.30188 | 8.79979 | 1.41626 | 0.502087 | 1.41626 |
| Ddx18    | NM_025860    | 0.004305 | 5.83279 | 9.63703 | 9.13516 | 1.41605 | 0.501869 | 1.41605 |
| Sumf1    | NM_145937    | 0.002575 | 6.70495 | 9.66604 | 9.16418 | 1.41603 | 0.501855 | 1.41603 |
| Ube2q1   | NM_027315    | 0.00072  | 9.37736 | 8.61579 | 8.11424 | 1.41573 | 0.501547 | 1.41573 |
| Ptpn12   | NM_011203    | 0.000969 | 8.68133 | 9.28845 | 8.78729 | 1.41535 | 0.501159 | 1.41535 |
| Vps39    | NM_147153    | 0.000707 | 9.42338 | 8.65572 | 8.15492 | 1.415   | 0.500801 | 1.415   |
| Mark3    | NM_021516    | 0.005258 | 5.52031 | 8.37811 | 7.87811 | 1.41422 | 0.500007 | 1.41422 |
| Ggnbp2   | NM_153144    | 0.000622 | 9.7405  | 9.66015 | 9.16026 | 1.41411 | 0.499892 | 1.41411 |
|          | ---          | 0.004056 | 5.92879 | 10.5446 | 10.045  | 1.41381 | 0.499589 | 1.41381 |
| Ganab    | NM_008060    | 0.004302 | 5.83388 | 10.9642 | 10.4647 | 1.41367 | 0.499447 | 1.41367 |
|          | ---          | 0.006813 | 5.1353  | 9.92119 | 9.42244 | 1.41299 | 0.498754 | 1.41299 |
| Nr3c1    | NM_008173    | 0.001565 | 7.65485 | 9.45186 | 8.95311 | 1.41298 | 0.498746 | 1.41298 |
| Itfg3    | NM_207217    | 0.000143 | 14.1982 | 9.41352 | 8.91489 | 1.41287 | 0.498625 | 1.41287 |
| Rad23b   | NM_009011    | 0.000716 | 9.39319 | 9.20388 | 8.7057  | 1.41243 | 0.498181 | 1.41243 |
| Gde1     | NM_019580    | 0.000579 | 9.92228 | 9.05853 | 8.56105 | 1.41175 | 0.497481 | 1.41175 |
| Pptc7    | NM_177242    | 0.000578 | 9.92926 | 8.09793 | 7.60081 | 1.4114  | 0.497123 | 1.4114  |
| Sin3b    | NM_009188    | 0.004522 | 5.75473 | 8.73078 | 8.23373 | 1.41133 | 0.497052 | 1.41133 |
| Fam116b  | NM_027081    | 0.000337 | 11.4097 | 6.03749 | 5.54129 | 1.4105  | 0.496204 | 1.4105  |
| Tbc1d25  | NM_172478    | 4.04E-05 | 19.5479 | 6.85888 | 6.36273 | 1.41045 | 0.496156 | 1.41045 |

|        |                   |          |         |         |         |         |          |         |
|--------|-------------------|----------|---------|---------|---------|---------|----------|---------|
| Nhp2l1 | NM_011482         | 0.002299 | 6.91195 | 11.3732 | 10.8771 | 1.41038 | 0.496084 | 1.41038 |
|        | ---               | 0.003031 | 6.41684 | 10.9549 | 10.4592 | 1.41    | 0.495696 | 1.41    |
| Smek2  | NM_134034         | 0.004918 | 5.62328 | 9.28796 | 8.79249 | 1.40978 | 0.495468 | 1.40978 |
| Ptpn3  | NM_011207         | 0.002975 | 6.44934 | 6.21355 | 5.71845 | 1.40942 | 0.495105 | 1.40942 |
| Cox4nb | NM_010926         | 0.006499 | 5.20378 | 7.79663 | 7.3023  | 1.40866 | 0.494324 | 1.40866 |
| Pthr1  | NM_178595         | 0.001036 | 8.53013 | 7.89144 | 7.3972  | 1.40857 | 0.494236 | 1.40857 |
| Nfe2l1 | NM_008686         | 0.006656 | 5.16912 | 10.3661 | 9.87202 | 1.4084  | 0.494053 | 1.4084  |
| Cnot7  | NM_011135         | 0.000381 | 11.054  | 9.15517 | 8.66159 | 1.40794 | 0.493583 | 1.40794 |
| Ube2v1 | NM_023230         | 0.000904 | 8.83958 | 9.08271 | 8.5893  | 1.40776 | 0.493402 | 1.40776 |
| Lass5  | NM_028015         | 0.001006 | 8.59684 | 10.1517 | 9.65844 | 1.40764 | 0.493274 | 1.40764 |
| Gatad1 | NM_026033         | 0.001863 | 7.30974 | 9.51028 | 9.01802 | 1.40665 | 0.492259 | 1.40665 |
| Mrpl10 | NM_026154         | 0.002043 | 7.13244 | 8.75527 | 8.26309 | 1.40657 | 0.492181 | 1.40657 |
| Kif13a | NM_010617         | 0.006335 | 5.24123 | 7.08033 | 6.5884  | 1.40633 | 0.491932 | 1.40633 |
| Ppp3r1 | NM_024459         | 0.003341 | 6.25037 | 9.2614  | 8.76949 | 1.40631 | 0.491912 | 1.40631 |
| Prpf3  | NM_027541         | 0.001567 | 7.65239 | 7.96606 | 7.47524 | 1.40524 | 0.49082  | 1.40524 |
| Arl2bp | NM_024191         | 0.003689 | 6.08408 | 10.187  | 9.69645 | 1.40493 | 0.490503 | 1.40493 |
|        | ---               | 0.001912 | 7.25942 | 8.78294 | 8.29315 | 1.40424 | 0.489792 | 1.40424 |
| Ppia   | NM_008907         | 0.000516 | 10.2221 | 12.4706 | 11.9827 | 1.40236 | 0.487856 | 1.40236 |
| Emp3   | NM_010129         | 0.005108 | 5.56467 | 11.4358 | 10.9482 | 1.40208 | 0.487569 | 1.40208 |
| Paf1   | NM_019458         | 7.69E-05 | 16.6128 | 9.39656 | 8.9091  | 1.40197 | 0.487456 | 1.40197 |
| Stat6  | NM_009284         | 0.002889 | 6.5007  | 9.29444 | 8.807   | 1.40196 | 0.487443 | 1.40196 |
| Helz   | NM_198298         | 0.004719 | 5.68773 | 8.06703 | 7.57993 | 1.40163 | 0.487102 | 1.40163 |
| Mut    | NM_008650         | 0.000425 | 10.747  | 9.0398  | 8.55282 | 1.40151 | 0.486981 | 1.40151 |
|        | ENSMUST0000010533 |          |         |         |         |         |          |         |
| Dot1l  | 6                 | 0.002844 | 6.52836 | 6.88032 | 6.39407 | 1.40079 | 0.486243 | 1.40079 |
| Strada | NM_028126         | 0.00152  | 7.7146  | 7.7539  | 7.2685  | 1.39997 | 0.485398 | 1.39997 |
| Nhp2l1 | NM_011482         | 0.002813 | 6.5476  | 11.0823 | 10.5969 | 1.39996 | 0.485388 | 1.39996 |
| Paics  | NM_025939         | 0.005798 | 5.37232 | 11.8101 | 11.3247 | 1.39995 | 0.485379 | 1.39995 |
| Rbm28  | NM_133925         | 0.000837 | 9.01847 | 7.46789 | 6.98367 | 1.39884 | 0.484227 | 1.39884 |
| Csnk1e | NM_013767         | 0.00232  | 6.89495 | 9.13701 | 8.6528  | 1.39882 | 0.48421  | 1.39882 |
| Sec24b | NM_207209         | 0.004136 | 5.89715 | 8.76239 | 8.27861 | 1.39841 | 0.483786 | 1.39841 |

|               |                                |          |         |         |         |         |          |         |
|---------------|--------------------------------|----------|---------|---------|---------|---------|----------|---------|
| Ewsr1         | NM_007968                      | 0.003805 | 6.03297 | 6.81941 | 6.33608 | 1.39796 | 0.483328 | 1.39796 |
| Cct2          | NM_007636                      | 0.003902 | 5.99172 | 11.571  | 11.0877 | 1.39791 | 0.483269 | 1.39791 |
| Gcn111        | NM_172719<br>ENSMUST0000002518 | 0.000566 | 9.98076 | 8.37501 | 7.89179 | 1.39786 | 0.483221 | 1.39786 |
| Dsc1          | 7                              | 0.002573 | 6.70662 | 6.8465  | 6.3633  | 1.39784 | 0.4832   | 1.39784 |
| Casq2         | NM_009814                      | 0.001382 | 7.91043 | 4.85138 | 4.36837 | 1.39766 | 0.483017 | 1.39766 |
| Smarce1       | NM_020618                      | 0.001148 | 8.30494 | 10.0583 | 9.57543 | 1.39756 | 0.482909 | 1.39756 |
|               | ---                            | 0.004632 | 5.71674 | 9.0993  | 8.61716 | 1.39682 | 0.482141 | 1.39682 |
| Snmp48        | NM_026382                      | 0.002533 | 6.73441 | 6.60589 | 6.12384 | 1.39672 | 0.48204  | 1.39672 |
| Rnf115        | NM_026406                      | 0.004779 | 5.66784 | 8.68645 | 8.20453 | 1.3966  | 0.481922 | 1.3966  |
| St13          | NM_133726                      | 0.003632 | 6.11014 | 10.0903 | 9.60884 | 1.39616 | 0.481465 | 1.39616 |
| Iffo1         | NM_178787                      | 0.003815 | 6.02872 | 7.11501 | 6.63407 | 1.39566 | 0.480948 | 1.39566 |
| Snx17         | NM_153680                      | 0.005301 | 5.5079  | 9.69137 | 9.21101 | 1.3951  | 0.480364 | 1.3951  |
| Oscp1         | NM_172701                      | 0.000404 | 10.8853 | 6.13768 | 5.65739 | 1.39502 | 0.480291 | 1.39502 |
| Flywch1       | NM_153791                      | 0.006953 | 5.10602 | 7.38096 | 6.90089 | 1.39481 | 0.480064 | 1.39481 |
| 4931428F04Rik | NM_028888                      | 0.004999 | 5.59786 | 5.64794 | 5.16876 | 1.39395 | 0.47918  | 1.39395 |
| Haus5         | NM_027999                      | 0.004986 | 5.60183 | 6.23808 | 5.75903 | 1.39382 | 0.479046 | 1.39382 |
| Lym7          | NM_029327                      | 0.001478 | 7.77152 | 4.38829 | 3.90941 | 1.39366 | 0.478879 | 1.39366 |
| Eif4enif1     | NM_023743                      | 0.000682 | 9.51305 | 8.0339  | 7.55508 | 1.3936  | 0.478818 | 1.3936  |
|               | ---                            | 0.000105 | 15.347  | 6.67894 | 6.20142 | 1.39235 | 0.477522 | 1.39235 |
| Ube2v1        | NM_023230                      | 0.001203 | 8.20293 | 9.34742 | 8.87003 | 1.39222 | 0.477386 | 1.39222 |
| Xpnpep1       | NM_133216                      | 0.002535 | 6.73334 | 9.56006 | 9.08278 | 1.39211 | 0.477274 | 1.39211 |
|               | ---                            | 0.003314 | 6.26376 | 5.15139 | 4.67423 | 1.39201 | 0.477168 | 1.39201 |
| Dthd1         | NM_001170705                   | 0.004714 | 5.68919 | 3.52717 | 3.05018 | 1.39183 | 0.476985 | 1.39183 |
| Tasp1         | NM_175225                      | 0.000319 | 11.5645 | 7.00403 | 6.52752 | 1.39138 | 0.476517 | 1.39138 |
| Smarce1       | NM_020618                      | 0.00146  | 7.79651 | 10.053  | 9.57659 | 1.39127 | 0.476399 | 1.39127 |
| Pabpn1        | NM_019402                      | 0.000813 | 9.08719 | 9.23258 | 8.75621 | 1.39124 | 0.476368 | 1.39124 |
| Tph1          | NM_009414                      | 0.003053 | 6.40443 | 4.4529  | 3.97662 | 1.39115 | 0.476278 | 1.39115 |
| Tapt1         | NM_173764                      | 0.000676 | 9.53204 | 9.53929 | 9.06332 | 1.39085 | 0.475971 | 1.39085 |
| Ppia          | NM_008907                      | 0.000515 | 10.2302 | 12.5868 | 12.1108 | 1.39082 | 0.475937 | 1.39082 |
| Rabif         | NM_145510                      | 0.002332 | 6.88497 | 8.05526 | 7.57939 | 1.39076 | 0.475871 | 1.39076 |

|               |              |          |         |         |         |         |          |         |
|---------------|--------------|----------|---------|---------|---------|---------|----------|---------|
| Rev1          | NM_019570    | 0.002184 | 7.00729 | 8.30369 | 7.82807 | 1.39051 | 0.475618 | 1.39051 |
| Mxra8         | NM_024263    | 0.006007 | 5.31971 | 11.2056 | 10.7302 | 1.39029 | 0.475383 | 1.39029 |
| Parp4         | NM_001145978 | 0.001222 | 8.17028 | 7.43385 | 6.95863 | 1.39013 | 0.475222 | 1.39013 |
| Pdxp          | NM_020271    | 0.001191 | 8.22622 | 6.02229 | 5.54712 | 1.39008 | 0.475172 | 1.39008 |
| Secisbp2l     | NM_177608    | 0.002157 | 7.02983 | 8.18215 | 7.70861 | 1.38852 | 0.473544 | 1.38852 |
| Ppp4r1        | NM_146081    | 0.000143 | 14.1971 | 9.31413 | 8.84076 | 1.38835 | 0.473374 | 1.38835 |
| Gabbr1        | NM_019439    | 0.002275 | 6.93061 | 7.18045 | 6.70744 | 1.38801 | 0.473015 | 1.38801 |
| Gnb1          | NM_008142    | 0.005992 | 5.32338 | 11.654  | 11.1812 | 1.38781 | 0.472805 | 1.38781 |
| Efna5         | NM_207654    | 0.001471 | 7.78085 | 6.75804 | 6.28574 | 1.38732 | 0.472297 | 1.38732 |
| Eps15l1       | NM_007944    | 0.000704 | 9.4347  | 8.01023 | 7.538   | 1.38725 | 0.472231 | 1.38725 |
| 3000002C10Rik | NR_033215    | 0.006387 | 5.22922 | 5.62547 | 5.15368 | 1.38683 | 0.471786 | 1.38683 |
|               | ---          | 0.00034  | 11.384  | 12.207  | 11.7352 | 1.38677 | 0.471731 | 1.38677 |
| B230315N10Rik | NM_001105557 | 0.004834 | 5.64997 | 8.67178 | 8.2004  | 1.38644 | 0.471382 | 1.38644 |
| Smarce1       | NM_020618    | 0.001502 | 7.73839 | 10.1731 | 9.70174 | 1.38642 | 0.471365 | 1.38642 |
| Ptdss2        | NM_013782    | 0.000458 | 10.539  | 7.8344  | 7.36325 | 1.38622 | 0.471152 | 1.38622 |
| Snrpb2        | NM_021335    | 0.004034 | 5.93758 | 9.17606 | 8.70672 | 1.38448 | 0.469348 | 1.38448 |
| Zkscan17      | NM_172941    | 0.000819 | 9.06959 | 7.52047 | 7.05117 | 1.38444 | 0.469305 | 1.38444 |
| Tomm40        | NM_001109748 | 0.001452 | 7.80741 | 8.49058 | 8.02168 | 1.38405 | 0.468899 | 1.38405 |
| Fbxo11        | NM_001081034 | 0.004588 | 5.7318  | 9.38961 | 8.92089 | 1.38388 | 0.46872  | 1.38388 |
| Stac2         | NM_146028    | 0.005385 | 5.48374 | 5.686   | 5.21752 | 1.38365 | 0.468482 | 1.38365 |
| BC053749      | BC053749     | 0.002064 | 7.11351 | 5.70527 | 5.23679 | 1.38365 | 0.468482 | 1.38365 |
| Eif1          | NM_011508    | 0.003714 | 6.07311 | 10.6212 | 10.1528 | 1.38365 | 0.468481 | 1.38365 |
| Micall2       | NM_174850    | 0.004232 | 5.86027 | 6.37794 | 5.91011 | 1.38302 | 0.467823 | 1.38302 |
| Brd1          | NM_001033274 | 0.003684 | 6.08665 | 8.73945 | 8.27215 | 1.38252 | 0.4673   | 1.38252 |
| Ppp1r12b      | NM_001081307 | 0.001265 | 8.0956  | 5.04159 | 4.57553 | 1.38133 | 0.466056 | 1.38133 |
| Ube2n         | NM_080560    | 0.004946 | 5.61441 | 8.98163 | 8.51565 | 1.38126 | 0.465982 | 1.38126 |
| Mpv17l        | NM_033564    | 0.007062 | 5.08372 | 5.99487 | 5.52907 | 1.38108 | 0.465797 | 1.38108 |
| Dhx57         | NM_001163759 | 0.005509 | 5.44929 | 8.29157 | 7.82584 | 1.38101 | 0.465724 | 1.38101 |
| Diablo        | NM_023232    | 0.005983 | 5.32568 | 6.77615 | 6.31137 | 1.38011 | 0.46478  | 1.38011 |
| Prpf6         | NM_133701    | 0.002714 | 6.61061 | 9.47406 | 9.00958 | 1.37983 | 0.464487 | 1.37983 |
| Zfp384        | NM_175557    | 0.001959 | 7.21244 | 8.8639  | 8.39942 | 1.37982 | 0.464477 | 1.37982 |

|               |                        |          |         |         |         |         |          |         |
|---------------|------------------------|----------|---------|---------|---------|---------|----------|---------|
|               | ---                    | 0.004768 | 5.6714  | 9.41046 | 8.94614 | 1.37967 | 0.464322 | 1.37967 |
|               | ---                    | 0.001646 | 7.55307 | 9.90512 | 9.44113 | 1.37935 | 0.463988 | 1.37935 |
| Stx11         | NM_029075              | 0.005675 | 5.40468 | 7.54806 | 7.08412 | 1.37931 | 0.463944 | 1.37931 |
| Csn3          | NM_007786              | 0.001715 | 7.47172 | 3.60442 | 3.14083 | 1.37897 | 0.463586 | 1.37897 |
| Tcf3          | NM_001164147           | 0.005666 | 5.40689 | 8.49109 | 8.02815 | 1.37835 | 0.462943 | 1.37835 |
| Gm5113        | NM_001033540           | 0.001671 | 7.52331 | 5.83681 | 5.37568 | 1.37662 | 0.46113  | 1.37662 |
| Ctbs          | NM_028836              | 0.001375 | 7.92064 | 7.19604 | 6.73518 | 1.37636 | 0.460859 | 1.37636 |
| Scyl2         | NM_198021              | 0.003467 | 6.18772 | 9.00352 | 8.54352 | 1.37554 | 0.46     | 1.37554 |
| Gcap14        | NM_027045              | 0.000928 | 8.78062 | 9.24221 | 8.78227 | 1.37549 | 0.459942 | 1.37549 |
| AY358078      | AY358078               | 0.004596 | 5.72909 | 3.18368 | 2.72418 | 1.37506 | 0.459495 | 1.37506 |
| Ispd          | NM_178629              | 0.004873 | 5.63753 | 4.82567 | 4.36641 | 1.37483 | 0.459257 | 1.37483 |
| Tom1          | NM_011622              | 0.004407 | 5.7957  | 8.06496 | 7.60611 | 1.37444 | 0.458848 | 1.37444 |
| Rela          | NM_009045              | 0.00107  | 8.46042 | 8.39139 | 7.93275 | 1.37424 | 0.458632 | 1.37424 |
| Ipo9          | NM_153774              | 0.005099 | 5.56722 | 9.65688 | 9.19846 | 1.37403 | 0.458415 | 1.37403 |
| Supt5h        | NM_013676              | 0.001456 | 7.80279 | 9.61244 | 9.15409 | 1.37397 | 0.458349 | 1.37397 |
| Atad1         | NM_026487              | 0.002698 | 6.6211  | 9.9092  | 9.45144 | 1.3734  | 0.457754 | 1.3734  |
| Cd200         | NM_010818              | 0.001858 | 7.31517 | 4.11555 | 3.65799 | 1.37323 | 0.457569 | 1.37323 |
| D830014E11Rik | ENSMUST0000005599<br>4 | 0.005706 | 5.39646 | 4.56104 | 4.10359 | 1.37312 | 0.457457 | 1.37312 |
| Vti1a         | NM_016862              | 0.004493 | 5.76477 | 7.30557 | 6.84858 | 1.37268 | 0.456991 | 1.37268 |
| Nedd8         | NM_008683              | 0.000524 | 10.1825 | 10.3637 | 9.9068  | 1.37258 | 0.456895 | 1.37258 |
| Zfp511        | NM_027201              | 0.001647 | 7.55195 | 8.12975 | 7.67309 | 1.37236 | 0.456659 | 1.37236 |
| Fam100b       | NM_176902              | 8.46E-05 | 16.2159 | 7.59915 | 7.14253 | 1.37232 | 0.456622 | 1.37232 |
| Hsp90ab1      | NM_008302              | 0.001541 | 7.68568 | 12.2834 | 11.827  | 1.3721  | 0.456388 | 1.3721  |
| Ngdn          | NM_026890              | 0.005088 | 5.57077 | 7.40303 | 6.94666 | 1.37208 | 0.456368 | 1.37208 |
| Lsg1          | NM_178069              | 0.00535  | 5.49388 | 8.56411 | 8.10812 | 1.37173 | 0.455992 | 1.37173 |
| Abcf2         | NM_013853              | 0.000814 | 9.08399 | 9.55832 | 9.10239 | 1.37166 | 0.455928 | 1.37166 |
| Ikzf5         | NM_175115              | 0.001703 | 7.48557 | 9.39248 | 8.93662 | 1.3716  | 0.455857 | 1.3716  |
| Stk11         | NM_011492              | 0.00525  | 5.52259 | 9.47773 | 9.02187 | 1.37159 | 0.455854 | 1.37159 |
| Cul4a         | NM_146207              | 0.002991 | 6.44022 | 8.6326  | 8.17688 | 1.37146 | 0.455712 | 1.37146 |
| Cabin1        | NM_172549              | 0.006104 | 5.29601 | 7.66016 | 7.20464 | 1.37128 | 0.455522 | 1.37128 |

|               |              |          |         |         |         |         |          |         |
|---------------|--------------|----------|---------|---------|---------|---------|----------|---------|
| 1700001G17Rik | NR_033199    | 0.00657  | 5.18798 | 5.9971  | 5.54217 | 1.37072 | 0.454929 | 1.37072 |
| Mks1          | NM_001039684 | 0.00519  | 5.54019 | 6.57498 | 6.12046 | 1.37033 | 0.454521 | 1.37033 |
| Cpne1         | NM_170588    | 0.002329 | 6.88789 | 9.18706 | 8.73259 | 1.37028 | 0.454469 | 1.37028 |
| Vta1          | NM_025418    | 0.000569 | 9.96668 | 9.10092 | 8.64669 | 1.37006 | 0.454236 | 1.37006 |
| Atp13a1       | NM_133224    | 0.0051   | 5.567   | 8.07611 | 7.62203 | 1.36991 | 0.454082 | 1.36991 |
| Wbp11         | NM_021714    | 0.001238 | 8.14282 | 8.328   | 7.87478 | 1.3691  | 0.453223 | 1.3691  |
| Zfp668        | NM_146259    | 0.001999 | 7.17455 | 5.71224 | 5.25972 | 1.36843 | 0.452525 | 1.36843 |
| Lrpprc        | NM_028233    | 0.004856 | 5.64293 | 9.13513 | 8.68475 | 1.3664  | 0.45038  | 1.3664  |
| Rnf6          | NM_028774    | 0.002631 | 6.66607 | 9.01827 | 8.56933 | 1.36504 | 0.448945 | 1.36504 |
| Wdr92         | NM_178909    | 0.001309 | 8.02423 | 7.01658 | 6.5679  | 1.36478 | 0.448671 | 1.36478 |
| Doc2g         | NM_021791    | 0.000686 | 9.49607 | 6.42844 | 5.98003 | 1.36453 | 0.448404 | 1.36453 |
| Ppia          | NM_008907    | 0.002188 | 7.00334 | 12.7013 | 12.253  | 1.36444 | 0.448305 | 1.36444 |
| Rfk           | NM_019437    | 0.002841 | 6.53021 | 9.07292 | 8.62528 | 1.36381 | 0.44764  | 1.36381 |
| Dhrs7b        | NM_001172112 | 0.000667 | 9.56735 | 7.99766 | 7.55023 | 1.3636  | 0.447425 | 1.3636  |
| Dak           | NM_145496    | 0.004678 | 5.70133 | 7.73833 | 7.29107 | 1.36345 | 0.447263 | 1.36345 |
|               | ---          | 0.0031   | 6.37802 | 5.86793 | 5.42074 | 1.36338 | 0.447193 | 1.36338 |
| Dhx34         | NM_027883    | 0.003764 | 6.05095 | 6.84031 | 6.39318 | 1.36333 | 0.447132 | 1.36333 |
| B4galt2       | NM_017377    | 0.00311  | 6.37242 | 7.20448 | 6.75745 | 1.36323 | 0.447029 | 1.36323 |
| Rpl30         | NM_009083    | 0.000836 | 9.02102 | 9.013   | 8.56638 | 1.36285 | 0.446625 | 1.36285 |
| Xrcc2         | NM_020570    | 0.001846 | 7.32769 | 5.97054 | 5.52421 | 1.36257 | 0.446327 | 1.36257 |
| 1810009A15Rik | BC047099     | 0.001255 | 8.1135  | 6.37809 | 5.93266 | 1.36172 | 0.44543  | 1.36172 |
|               | ---          | 0.003742 | 6.0608  | 9.13988 | 8.69462 | 1.36155 | 0.445254 | 1.36155 |
|               | ---          | 0.005214 | 5.53303 | 9.59686 | 9.15217 | 1.36102 | 0.444692 | 1.36102 |
| Acyp1         | NM_025421    | 0.004716 | 5.68861 | 6.34363 | 5.89913 | 1.36084 | 0.444499 | 1.36084 |
| Ankrd50       | NM_001167883 | 0.003901 | 5.99216 | 7.92148 | 7.47701 | 1.36081 | 0.444465 | 1.36081 |
| Ube2n         | NM_080560    | 0.00415  | 5.89185 | 8.93447 | 8.4901  | 1.36071 | 0.444365 | 1.36071 |
| Mkks          | NM_021527    | 0.00237  | 6.8554  | 7.6616  | 7.21728 | 1.36067 | 0.444319 | 1.36067 |
| Grsf1         | NM_178700    | 0.003627 | 6.11246 | 8.79569 | 8.35182 | 1.36024 | 0.443864 | 1.36024 |
| Sugp1         | NM_027481    | 0.005538 | 5.4415  | 7.36565 | 6.92229 | 1.35976 | 0.443354 | 1.35976 |
| Pfn1          | NM_011072    | 0.00685  | 5.12751 | 10.3755 | 9.9322  | 1.3597  | 0.443289 | 1.3597  |
| BC030336      | NM_001164580 | 0.004144 | 5.89408 | 8.59415 | 8.15105 | 1.35952 | 0.443097 | 1.35952 |

|               |           |          |         |         |         |         |          |         |
|---------------|-----------|----------|---------|---------|---------|---------|----------|---------|
| Tom1          | NM_011622 | 0.004753 | 5.67648 | 8.10915 | 7.66643 | 1.35916 | 0.442714 | 1.35916 |
| Akap8         | NM_019774 | 0.000858 | 8.96216 | 9.25632 | 8.81363 | 1.35914 | 0.442691 | 1.35914 |
|               | ---       | 0.001879 | 7.29265 | 7.24387 | 6.80184 | 1.35852 | 0.442031 | 1.35852 |
| Zfp64         | NM_009564 | 0.003079 | 6.39003 | 6.93075 | 6.48898 | 1.35827 | 0.441774 | 1.35827 |
| Cfl1          | NM_007687 | 0.00052  | 10.2044 | 11.5485 | 11.1071 | 1.35792 | 0.441402 | 1.35792 |
| Ewsr1         | NM_007968 | 0.006499 | 5.20379 | 10.558  | 10.1171 | 1.35747 | 0.44092  | 1.35747 |
| Kif3b         | NM_008444 | 0.002846 | 6.52707 | 8.29512 | 7.85466 | 1.35704 | 0.440466 | 1.35704 |
| Asb7          | NR_003961 | 0.006271 | 5.2562  | 5.90169 | 5.46143 | 1.35685 | 0.440264 | 1.35685 |
| Glt25d1       | NM_146211 | 0.005325 | 5.5009  | 9.84253 | 9.40262 | 1.35652 | 0.439914 | 1.35652 |
| Klhdc3        | NM_027910 | 0.000194 | 13.143  | 8.73126 | 8.29141 | 1.35646 | 0.439847 | 1.35646 |
| Rgs19         | NM_026446 | 0.005811 | 5.36894 | 8.0015  | 7.56216 | 1.35599 | 0.439344 | 1.35599 |
| Sharpin       | NM_025340 | 0.00303  | 6.4174  | 9.23566 | 8.79639 | 1.35592 | 0.43927  | 1.35592 |
| 2310057M21Rik | BC044749  | 0.00134  | 7.97482 | 7.71308 | 7.2739  | 1.35584 | 0.439182 | 1.35584 |
| Cdk17         | NM_146239 | 0.0053   | 5.50805 | 8.29952 | 7.8607  | 1.3555  | 0.438823 | 1.3555  |
| Nap1l2        | NM_008671 | 0.003113 | 6.37109 | 3.32226 | 2.88362 | 1.35533 | 0.43864  | 1.35533 |
| Pi4k2a        | NM_145501 | 0.003257 | 6.29367 | 8.6903  | 8.25249 | 1.35455 | 0.437816 | 1.35455 |
| Ndufa3        | NM_025348 | 7.28E-06 | 30.0709 | 8.81037 | 8.37266 | 1.35445 | 0.437711 | 1.35445 |
| Gatsl2        | NM_030719 | 0.002443 | 6.80012 | 6.93196 | 6.49446 | 1.35426 | 0.4375   | 1.35426 |
| Fxr2          | NM_011814 | 0.004111 | 5.90708 | 8.66918 | 8.23203 | 1.35392 | 0.437148 | 1.35392 |
| CommD9        | NM_029635 | 0.003039 | 6.41236 | 7.24792 | 6.81113 | 1.35359 | 0.436789 | 1.35359 |
| G3bp2         | NM_011816 | 0.003199 | 6.32406 | 9.79979 | 9.36386 | 1.35279 | 0.435937 | 1.35279 |
| Zbtb49        | NM_029162 | 0.000555 | 10.0319 | 6.43215 | 5.9976  | 1.35149 | 0.434549 | 1.35149 |
|               | ---       | 0.004713 | 5.68967 | 10.4328 | 9.99856 | 1.35115 | 0.43419  | 1.35115 |
| Ces2f         | BC117742  | 4.58E-05 | 18.9358 | 3.77467 | 3.34073 | 1.35092 | 0.43394  | 1.35092 |
| Tpp2          | NM_009418 | 0.00043  | 10.7149 | 8.89865 | 8.46488 | 1.35075 | 0.433764 | 1.35075 |
| 4933434E20Rik | NM_025762 | 0.000745 | 9.29478 | 9.69649 | 9.26308 | 1.35042 | 0.433412 | 1.35042 |
|               | ---       | 0.001575 | 7.64211 | 4.37349 | 3.94091 | 1.34964 | 0.432578 | 1.34964 |
| Mmab          | NM_029956 | 0.001358 | 7.94646 | 7.14994 | 6.71743 | 1.34958 | 0.432511 | 1.34958 |
| Ppia          | NM_008907 | 0.00565  | 5.4113  | 12.3399 | 11.9075 | 1.34947 | 0.432388 | 1.34947 |
| Terf2         | NM_009353 | 0.0003   | 11.756  | 7.67265 | 7.2407  | 1.34906 | 0.431958 | 1.34906 |
| Evi5          | NM_007964 | 0.004811 | 5.6575  | 8.30081 | 7.86903 | 1.34889 | 0.431773 | 1.34889 |



|               |              |          |         |         |         |         |          |         |
|---------------|--------------|----------|---------|---------|---------|---------|----------|---------|
|               | ---          | 0.004259 | 5.85006 | 10.8395 | 10.4084 | 1.34823 | 0.431066 | 1.34823 |
| Slc45a4       | NM_001033219 | 0.001091 | 8.41617 | 7.807   | 7.37606 | 1.34811 | 0.430941 | 1.34811 |
| Ppm1h         | NM_001110218 | 0.000623 | 9.73829 | 5.76801 | 5.33725 | 1.34795 | 0.430762 | 1.34795 |
| Mrpl21        | NM_172252    | 0.003906 | 5.99006 | 7.46954 | 7.03897 | 1.34776 | 0.430563 | 1.34776 |
| Atp1a1        | NM_144900    | 0.007019 | 5.09264 | 9.95705 | 9.52657 | 1.34768 | 0.430479 | 1.34768 |
| Lcmt1         | NM_025304    | 0.000156 | 13.8901 | 7.25517 | 6.82566 | 1.34677 | 0.429507 | 1.34677 |
| Usp47         | NM_133758    | 0.00015  | 14.0237 | 10.0301 | 9.60107 | 1.34634 | 0.429044 | 1.34634 |
| Rras          | NM_009101    | 0.00037  | 11.1393 | 9.48749 | 9.05845 | 1.34634 | 0.429042 | 1.34634 |
| Usp30         | NM_001033202 | 0.0003   | 11.7533 | 7.53709 | 7.10848 | 1.34594 | 0.42861  | 1.34594 |
|               | ---          | 0.00512  | 5.56097 | 4.16801 | 3.73944 | 1.3459  | 0.428575 | 1.3459  |
|               | ---          | 0.000682 | 9.5103  | 9.1225  | 8.69488 | 1.34501 | 0.427615 | 1.34501 |
| E2f3          | NM_010093    | 0.005948 | 5.33439 | 7.10491 | 6.67738 | 1.34493 | 0.427526 | 1.34493 |
| Adipor1       | NM_028320    | 0.000618 | 9.75646 | 9.24931 | 8.82214 | 1.34459 | 0.42717  | 1.34459 |
| Rnf20         | NM_001163263 | 0.004843 | 5.64709 | 8.56001 | 8.13345 | 1.34402 | 0.426556 | 1.34402 |
| Rai12         | NM_018740    | 0.003365 | 6.23801 | 9.03535 | 8.60935 | 1.34351 | 0.426006 | 1.34351 |
| Acd           | NM_001012638 | 0.005146 | 5.55336 | 6.82473 | 6.39934 | 1.34293 | 0.425381 | 1.34293 |
| Vps11         | NM_027889    | 0.00423  | 5.86119 | 9.06924 | 8.64448 | 1.34235 | 0.42476  | 1.34235 |
| Utp6          | NM_144826    | 0.000852 | 8.97751 | 8.84631 | 8.42383 | 1.34023 | 0.422479 | 1.34023 |
|               | ---          | 0.001927 | 7.24425 | 9.24664 | 8.82419 | 1.34021 | 0.422456 | 1.34021 |
| 1500002O20Rik | NM_028047    | 0.000315 | 11.6037 | 6.76438 | 6.34233 | 1.33982 | 0.422044 | 1.33982 |
| Inpp1         | NM_010567    | 8.18E-05 | 16.3542 | 5.24052 | 4.81853 | 1.33977 | 0.421985 | 1.33977 |
| Lins          | NM_152815    | 0.005325 | 5.50085 | 6.99221 | 6.57112 | 1.33893 | 0.421084 | 1.33893 |
| Calm1         | NM_009790    | 0.001447 | 7.81516 | 10.6882 | 10.2679 | 1.33818 | 0.420274 | 1.33818 |
| Ppp1r12b      | NM_001081307 | 0.000746 | 9.29137 | 6.84792 | 6.4277  | 1.33813 | 0.420218 | 1.33813 |
| Notch2        | NM_010928    | 0.000134 | 14.4332 | 9.19304 | 8.77308 | 1.33789 | 0.419957 | 1.33789 |
| Flot2         | NM_008028    | 0.001416 | 7.85919 | 7.62245 | 7.20268 | 1.33771 | 0.419771 | 1.33771 |
| Tti1          | NM_029282    | 0.005454 | 5.46464 | 7.66489 | 7.24537 | 1.33748 | 0.41952  | 1.33748 |
| Plp2          | NM_019755    | 0.006293 | 5.25097 | 10.8731 | 10.4538 | 1.33734 | 0.419368 | 1.33734 |
| Vps4b         | NM_009190    | 0.002151 | 7.03529 | 10.1005 | 9.68231 | 1.33627 | 0.418206 | 1.33627 |
| Suv420h1      | NM_001167885 | 0.001254 | 8.11488 | 8.45282 | 8.03543 | 1.3355  | 0.417381 | 1.3355  |
| Dnttip2       | NM_153806    | 0.005658 | 5.40898 | 7.52182 | 7.105   | 1.33499 | 0.416824 | 1.33499 |

|          |              |          |         |         |         |         |          |         |
|----------|--------------|----------|---------|---------|---------|---------|----------|---------|
| Prdx3    | NM_007452    | 0.000754 | 9.26647 | 10.2169 | 9.8005  | 1.33455 | 0.416359 | 1.33455 |
| Ctbp2    | NM_009980    | 0.002722 | 6.60586 | 7.98643 | 7.57092 | 1.33378 | 0.415517 | 1.33378 |
| Insc     | NM_173767    | 0.001457 | 7.80138 | 5.46415 | 5.04892 | 1.33351 | 0.415227 | 1.33351 |
| Hdac10   | NM_199198    | 0.003793 | 6.0382  | 7.22221 | 6.80789 | 1.33267 | 0.414316 | 1.33267 |
| Zfand3   | NM_148926    | 0.006183 | 5.27697 | 8.12174 | 7.70752 | 1.33258 | 0.414222 | 1.33258 |
| Itch     | NM_008395    | 0.005835 | 5.36302 | 9.4138  | 9.00168 | 1.33063 | 0.412113 | 1.33063 |
| Glg1     | NM_009149    | 0.000108 | 15.2492 | 10.4445 | 10.0324 | 1.33062 | 0.412102 | 1.33062 |
|          | ---          | 0.00161  | 7.59796 | 2.99573 | 2.58399 | 1.33028 | 0.411734 | 1.33028 |
| Mthfsd   | NM_172761    | 0.005736 | 5.38843 | 7.35461 | 6.94312 | 1.33006 | 0.41149  | 1.33006 |
| Xpnpep3  | NM_177310    | 0.002979 | 6.44681 | 7.47776 | 7.06644 | 1.3299  | 0.411319 | 1.3299  |
| Psma5    | NM_011967    | 0.00422  | 5.86503 | 8.94953 | 8.53878 | 1.32938 | 0.410752 | 1.32938 |
| Sgcb     | NM_011890    | 0.005042 | 5.58466 | 9.29093 | 8.88126 | 1.32839 | 0.409674 | 1.32839 |
| Dpp3     | NM_133803    | 6.84E-05 | 17.1126 | 8.50822 | 8.09865 | 1.32829 | 0.409575 | 1.32829 |
| Naf1     | NM_001163564 | 0.003033 | 6.4159  | 6.95454 | 6.54585 | 1.32748 | 0.408693 | 1.32748 |
| Pvrl3    | NM_021496    | 0.004172 | 5.88336 | 7.48997 | 7.08176 | 1.32704 | 0.408213 | 1.32704 |
| Mett11d1 | NM_001029990 | 0.006909 | 5.11527 | 7.05149 | 6.64362 | 1.32673 | 0.407874 | 1.32673 |
| Trpc4ap  | NM_001163452 | 0.002773 | 6.57292 | 10.2664 | 9.85947 | 1.32583 | 0.406898 | 1.32583 |
|          | ---          | 0.000408 | 10.8593 | 10.1994 | 9.79267 | 1.32568 | 0.406738 | 1.32568 |
|          | ---          | 0.001787 | 7.39127 | 10.5257 | 10.1192 | 1.32545 | 0.406482 | 1.32545 |
| Gm13034  | NR_030771    | 0.003378 | 6.23167 | 7.92736 | 7.52093 | 1.3254  | 0.40643  | 1.3254  |
| Slmo2    | NM_025531    | 0.005472 | 5.45953 | 8.38104 | 7.9747  | 1.32532 | 0.406343 | 1.32532 |
|          | ---          | 0.006019 | 5.31659 | 10.8524 | 10.4468 | 1.3247  | 0.405665 | 1.3247  |
| Trmt112  | NM_001166370 | 0.000985 | 8.64468 | 10.4977 | 10.0921 | 1.32464 | 0.405602 | 1.32464 |
| Pycl     | NM_025412    | 0.00421  | 5.8688  | 8.28822 | 7.88272 | 1.32455 | 0.405504 | 1.32455 |
| Ing5     | NM_025454    | 0.004893 | 5.63097 | 7.46499 | 7.05958 | 1.32447 | 0.405412 | 1.32447 |
| Trmt112  | NM_001166370 | 0.001417 | 7.85825 | 10.4936 | 10.0889 | 1.32377 | 0.404647 | 1.32377 |
| Alg14    | NM_024178    | 0.004911 | 5.62547 | 7.89774 | 7.49354 | 1.32336 | 0.404208 | 1.32336 |
| Nutf2    | NM_026532    | 0.002894 | 6.49743 | 10.049  | 9.64487 | 1.32325 | 0.404086 | 1.32325 |
| Nprl3    | NM_181569    | 0.003735 | 6.06365 | 8.18025 | 7.77671 | 1.32275 | 0.403541 | 1.32275 |
| Fbxo3    | NM_212433    | 0.005173 | 5.54516 | 9.23835 | 8.83516 | 1.32243 | 0.403189 | 1.32243 |
| Bzw1     | NM_025824    | 0.004994 | 5.59943 | 11.3141 | 10.9111 | 1.32228 | 0.403025 | 1.32228 |

|               |              |          |         |         |         |         |          |         |
|---------------|--------------|----------|---------|---------|---------|---------|----------|---------|
| Cops3         | NM_011991    | 0.003286 | 6.27814 | 9.02562 | 8.62355 | 1.3214  | 0.402071 | 1.3214  |
| Agpat4        | NM_026644    | 0.004222 | 5.86402 | 7.90696 | 7.5049  | 1.32139 | 0.40206  | 1.32139 |
| Brpf3         | NM_001081315 | 5.82E-05 | 17.8242 | 6.36679 | 5.96478 | 1.32135 | 0.40201  | 1.32135 |
| 1110018G07Rik | NM_178065    | 0.00296  | 6.45813 | 8.22759 | 7.82647 | 1.32053 | 0.401119 | 1.32053 |
| Ifne          | NM_177348    | 0.004443 | 5.78252 | 5.15175 | 4.75088 | 1.3203  | 0.40087  | 1.3203  |
| Pacrgl        | NM_025755    | 0.003148 | 6.3519  | 6.81354 | 6.41309 | 1.31992 | 0.400448 | 1.31992 |
| Chd1          | NM_007690    | 0.004705 | 5.69218 | 8.66455 | 8.26512 | 1.31899 | 0.399435 | 1.31899 |
| Med9          | NM_138675    | 0.002938 | 6.47149 | 6.98304 | 6.58395 | 1.31867 | 0.399087 | 1.31867 |
| Poldip2       | NM_026389    | 0.000818 | 9.07195 | 9.08278 | 8.68392 | 1.31847 | 0.398861 | 1.31847 |
| Rag1ap1       | NM_009057    | 0.00372  | 6.07034 | 9.97394 | 9.57539 | 1.31818 | 0.398544 | 1.31818 |
| Ceacam2       | NM_001113368 | 0.003725 | 6.06835 | 4.83964 | 4.44244 | 1.31695 | 0.397205 | 1.31695 |
| Ccdc129       | NM_001081665 | 0.000147 | 14.1083 | 3.95432 | 3.55739 | 1.3167  | 0.396928 | 1.3167  |
| Tecpr1        | NM_027410    | 0.003965 | 5.96569 | 7.54516 | 7.14877 | 1.3162  | 0.396382 | 1.3162  |
| 2210404J11Rik | NM_001039552 | 0.005511 | 5.44863 | 7.91551 | 7.5192  | 1.31614 | 0.396312 | 1.31614 |
| Usp36         | NM_001033528 | 0.000427 | 10.7315 | 7.47554 | 7.07934 | 1.31604 | 0.396208 | 1.31604 |
| Ewsr1         | NM_007968    | 0.002046 | 7.12999 | 6.65109 | 6.25539 | 1.31558 | 0.395702 | 1.31558 |
| Lpxn          | NM_134152    | 0.001332 | 7.98722 | 4.53736 | 4.14166 | 1.31558 | 0.395698 | 1.31558 |
| Nt5c3l        | NM_026561    | 0.001554 | 7.66952 | 8.13857 | 7.7429  | 1.31555 | 0.395668 | 1.31555 |
| Acot10        | NM_022816    | 0.00456  | 5.74136 | 5.66921 | 5.27396 | 1.31518 | 0.395255 | 1.31518 |
| Alkbh6        | NM_198027    | 0.003571 | 6.13803 | 6.75855 | 6.36334 | 1.31513 | 0.395207 | 1.31513 |
| Lgtn          | NM_001136070 | 0.000273 | 12.0371 | 6.89073 | 6.49554 | 1.31511 | 0.395187 | 1.31511 |
| Cyp4b1        | NM_007823    | 0.002298 | 6.912   | 4.98427 | 4.58919 | 1.31501 | 0.395077 | 1.31501 |
| Ogg1          | NM_010957    | 0.002421 | 6.81644 | 6.81523 | 6.4202  | 1.31497 | 0.395029 | 1.31497 |
| Lias          | NM_024471    | 0.002488 | 6.76733 | 8.18517 | 7.79057 | 1.31458 | 0.394605 | 1.31458 |
| Tdg           | NM_011561    | 0.004041 | 5.93495 | 7.92839 | 7.53383 | 1.31454 | 0.394561 | 1.31454 |
| Pax2          | NM_011037    | 0.002298 | 6.9124  | 5.65494 | 5.26108 | 1.3139  | 0.393855 | 1.3139  |
| Usp5          | NM_013700    | 0.002958 | 6.45924 | 9.24689 | 8.85309 | 1.31385 | 0.393802 | 1.31385 |
| Scarna17      | NR_028560    | 0.001192 | 8.22291 | 11.0699 | 10.6763 | 1.31366 | 0.393597 | 1.31366 |
| Scarna17      | NR_028560    | 0.001192 | 8.22291 | 11.0699 | 10.6763 | 1.31366 | 0.393597 | 1.31366 |
| Tdg           | NM_011561    | 0.002679 | 6.63415 | 8.00879 | 7.61523 | 1.31363 | 0.393558 | 1.31363 |
| Tceb2         | NM_026305    | 0.001651 | 7.54806 | 10.1407 | 9.74747 | 1.31337 | 0.393271 | 1.31337 |

|               |              |          |         |         |         |         |          |         |
|---------------|--------------|----------|---------|---------|---------|---------|----------|---------|
| Slc28a2       | NM_172980    | 0.004297 | 5.83573 | 4.87162 | 4.47881 | 1.31295 | 0.392817 | 1.31295 |
| Dvl2          | NM_007888    | 0.003629 | 6.11136 | 7.89794 | 7.5052  | 1.31289 | 0.392742 | 1.31289 |
| Klhl32        | NM_001163020 | 0.003933 | 5.9789  | 4.36054 | 3.9699  | 1.31097 | 0.39064  | 1.31097 |
| Helb          | NM_080446    | 0.004638 | 5.71479 | 7.93987 | 7.54964 | 1.3106  | 0.390226 | 1.3106  |
| Psmdb         | NM_026545    | 0.004339 | 5.82045 | 9.31976 | 8.92962 | 1.31052 | 0.390137 | 1.31052 |
| Stradb        | NM_172656    | 0.001651 | 7.54791 | 7.07253 | 6.68278 | 1.31017 | 0.38975  | 1.31017 |
| Nlrp4e        | NM_001004194 | 0.002568 | 6.70951 | 3.66046 | 3.27072 | 1.31016 | 0.38974  | 1.31016 |
| Snf8          | NM_033568    | 0.004774 | 5.66944 | 7.92705 | 7.53734 | 1.31013 | 0.389715 | 1.31013 |
| Nsfl1c        | NM_198326    | 0.006265 | 5.2576  | 9.35445 | 8.9653  | 1.30963 | 0.389158 | 1.30963 |
|               | ---          | 0.00062  | 9.75109 | 5.08675 | 4.69773 | 1.30951 | 0.389024 | 1.30951 |
|               | ---          | 0.00062  | 9.75109 | 5.08675 | 4.69773 | 1.30951 | 0.389024 | 1.30951 |
| Wdr45         | NM_172372    | 0.004116 | 5.90517 | 8.94643 | 8.55775 | 1.3092  | 0.388686 | 1.3092  |
| Sf3b3         | NM_133953    | 0.007035 | 5.0893  | 10.49   | 10.1014 | 1.30914 | 0.388621 | 1.30914 |
| Bat3          | NM_057171    | 0.00048  | 10.4148 | 9.49049 | 9.10248 | 1.30859 | 0.388013 | 1.30859 |
| Aktip         | NM_010241    | 0.006067 | 5.30496 | 8.47859 | 8.09075 | 1.30843 | 0.38784  | 1.30843 |
| Glyr1         | NM_001079814 | 0.000181 | 13.3783 | 9.2831  | 8.89528 | 1.30841 | 0.387818 | 1.30841 |
|               | ---          | 0.001078 | 8.44226 | 5.57919 | 5.19178 | 1.30804 | 0.387408 | 1.30804 |
| Hnrnpul1      | NM_144922    | 0.002253 | 6.94926 | 9.25138 | 8.86562 | 1.30655 | 0.385767 | 1.30655 |
| Fbxw11        | NM_134015    | 0.002702 | 6.61897 | 8.75956 | 8.37382 | 1.30653 | 0.385744 | 1.30653 |
| Eif4h         | NM_033561    | 0.005071 | 5.57569 | 10.7591 | 10.3746 | 1.30536 | 0.384443 | 1.30536 |
| Nhp2l1        | NM_011482    | 0.005745 | 5.38625 | 10.8817 | 10.498  | 1.30469 | 0.383707 | 1.30469 |
| C330006K01Rik | NM_172725    | 0.002384 | 6.84488 | 6.88125 | 6.49815 | 1.30414 | 0.383096 | 1.30414 |
|               | ---          | 0.007012 | 5.0939  | 10.3766 | 9.99377 | 1.30387 | 0.382799 | 1.30387 |
| 1700037H04Rik | BC071212     | 0.002693 | 6.62496 | 7.03789 | 6.65553 | 1.30347 | 0.382353 | 1.30347 |
| 4732418C07Rik | BC059213     | 0.000818 | 9.0736  | 7.56152 | 7.18003 | 1.30268 | 0.381488 | 1.30268 |
| Stim1         | NM_009287    | 0.005287 | 5.51168 | 7.58644 | 7.20618 | 1.30158 | 0.380262 | 1.30158 |
| Olfr368       | NM_146374    | 0.000904 | 8.84118 | 4.86517 | 4.48514 | 1.30137 | 0.380035 | 1.30137 |
| Ppapdc2       | NM_028922    | 0.000182 | 13.3418 | 6.81201 | 6.43198 | 1.30137 | 0.380032 | 1.30137 |
| Pofut1        | NM_080463    | 0.005353 | 5.49299 | 7.13961 | 6.75981 | 1.30116 | 0.379798 | 1.30116 |
| Brf1          | NM_028193    | 0.002301 | 6.90981 | 8.07867 | 7.70041 | 1.29977 | 0.378261 | 1.29977 |
| Znrf2         | NM_199143    | 0.004276 | 5.84389 | 8.12868 | 7.75073 | 1.2995  | 0.377958 | 1.2995  |

|               |              |          |         |         |         |         |          |         |
|---------------|--------------|----------|---------|---------|---------|---------|----------|---------|
|               | ---          | 0.005713 | 5.39453 | 2.72348 | 2.3457  | 1.29934 | 0.377775 | 1.29934 |
| Psm1          | NM_011965    | 0.000115 | 14.9897 | 9.68115 | 9.30346 | 1.29926 | 0.377694 | 1.29926 |
| Ube2i         | NM_011665    | 0.001414 | 7.86204 | 10.5488 | 10.1719 | 1.2986  | 0.376954 | 1.2986  |
| Trim41        | NM_145377    | 0.001048 | 8.50594 | 8.39756 | 8.02123 | 1.29803 | 0.376326 | 1.29803 |
| Ube2m         | NM_145578    | 0.003539 | 6.15325 | 8.97129 | 8.59563 | 1.29743 | 0.375662 | 1.29743 |
| Kif3c         | NM_008445    | 0.007011 | 5.09418 | 6.71014 | 6.33484 | 1.29711 | 0.375299 | 1.29711 |
| 6330577E15Rik | NM_026377    | 0.003821 | 6.02639 | 9.5082  | 9.13332 | 1.29673 | 0.374883 | 1.29673 |
|               | ---          | 0.004386 | 5.80306 | 9.97933 | 9.60474 | 1.29647 | 0.374587 | 1.29647 |
| Gm6682        | NR_033599    | 0.004256 | 5.8512  | 9.32129 | 8.94679 | 1.29639 | 0.374498 | 1.29639 |
| D11Wsu99e     | NM_138598    | 0.004795 | 5.6625  | 7.76628 | 7.3919  | 1.29628 | 0.374378 | 1.29628 |
| Eif4a3        | NM_138669    | 0.000307 | 11.6823 | 9.13765 | 8.76353 | 1.29605 | 0.374123 | 1.29605 |
| Psme2         | NM_011190    | 0.006377 | 5.23159 | 8.93858 | 8.56522 | 1.29536 | 0.373358 | 1.29536 |
| Nutf2         | NM_026532    | 0.004441 | 5.78323 | 10.0298 | 9.65711 | 1.29475 | 0.372677 | 1.29475 |
| Nutf2         | NM_026532    | 0.004441 | 5.78323 | 10.0298 | 9.65711 | 1.29475 | 0.372677 | 1.29475 |
|               | ---          | 0.003149 | 6.35106 | 11.0293 | 10.6574 | 1.29411 | 0.37196  | 1.29411 |
| Ccdc109b      | NM_025779    | 0.0009   | 8.8497  | 6.35749 | 5.98558 | 1.29407 | 0.371912 | 1.29407 |
| Plagl2        | NM_018807    | 0.001754 | 7.42765 | 6.55183 | 6.18042 | 1.29362 | 0.371416 | 1.29362 |
| Abi2          | NM_001198571 | 0.00162  | 7.58604 | 7.55206 | 7.18177 | 1.29261 | 0.370288 | 1.29261 |
|               | ---          | 0.001007 | 8.59422 | 11.4534 | 11.0832 | 1.29252 | 0.370185 | 1.29252 |
| Tm9sf3        | NM_133352    | 0.000641 | 9.66597 | 10.9614 | 10.5919 | 1.29193 | 0.36953  | 1.29193 |
| Whamm         | NM_001004185 | 0.006111 | 5.29423 | 6.83165 | 6.46245 | 1.29163 | 0.369198 | 1.29163 |
| Creb1         | NM_133828    | 0.005872 | 5.3535  | 8.60323 | 8.23441 | 1.2913  | 0.368826 | 1.2913  |
| Eif3a         | NM_010123    | 0.001047 | 8.50767 | 11.1161 | 10.7492 | 1.28954 | 0.366858 | 1.28954 |
| Lsm12         | NM_172947    | 0.004004 | 5.94962 | 10.3255 | 9.95923 | 1.28899 | 0.366244 | 1.28899 |
|               | ---          | 0.005021 | 5.59108 | 9.83942 | 9.47525 | 1.28715 | 0.364175 | 1.28715 |
| Fkbp1a        | NM_008019    | 0.002357 | 6.86593 | 8.96963 | 8.60565 | 1.28697 | 0.363975 | 1.28697 |
| Tmem120b      | NM_001039723 | 0.001646 | 7.55343 | 6.9067  | 6.54305 | 1.28668 | 0.363653 | 1.28668 |
| Erich1        | NM_001034862 | 0.005381 | 5.48505 | 6.8562  | 6.4932  | 1.2861  | 0.363005 | 1.2861  |
| Mapk1         | NM_011949    | 0.001402 | 7.88038 | 10.1386 | 9.77612 | 1.28563 | 0.362472 | 1.28563 |
| Hist1h2ba     | NM_175663    | 0.000898 | 8.85481 | 4.72151 | 4.3596  | 1.28512 | 0.361909 | 1.28512 |
|               | ---          | 0.00064  | 9.67027 | 10.1014 | 9.74072 | 1.28405 | 0.360703 | 1.28405 |

|               |                   |          |         |         |         |         |          |         |
|---------------|-------------------|----------|---------|---------|---------|---------|----------|---------|
| Mrpl2         | NM_025302         | 0.001903 | 7.26834 | 8.57199 | 8.21188 | 1.28353 | 0.360117 | 1.28353 |
| Nhp2l1        | NM_011482         | 0.006298 | 5.24976 | 10.8801 | 10.52   | 1.28347 | 0.360045 | 1.28347 |
| Rfng          | NM_009053         | 0.000593 | 9.86122 | 7.07235 | 6.71336 | 1.28252 | 0.358986 | 1.28252 |
| Ncoa5         | NM_144892         | 0.000191 | 13.1829 | 8.11193 | 7.75347 | 1.28205 | 0.358455 | 1.28205 |
| Gm12070       | NR_002890         | 0.000782 | 9.17955 | 12.2033 | 11.8451 | 1.2818  | 0.35817  | 1.2818  |
|               | ---               | 0.001796 | 7.38078 | 3.49105 | 3.13293 | 1.28175 | 0.358119 | 1.28175 |
| Mtap1s        | NM_173013         | 1.97E-06 | 41.7264 | 7.4054  | 7.04761 | 1.28146 | 0.357793 | 1.28146 |
|               | ---               | 0.001082 | 8.43499 | 10.1887 | 9.83099 | 1.28135 | 0.35766  | 1.28135 |
| Pias4         | NM_021501         | 0.005109 | 5.56437 | 7.95339 | 7.59575 | 1.28132 | 0.357636 | 1.28132 |
| Zfr           | NM_011767         | 0.002662 | 6.64505 | 9.64052 | 9.28405 | 1.28029 | 0.35647  | 1.28029 |
| Tgfbrap1      | NM_001013025      | 0.000935 | 8.7618  | 6.86727 | 6.51098 | 1.28013 | 0.356289 | 1.28013 |
| Dnajc14       | NM_028873         | 9.78E-05 | 15.6302 | 9.19575 | 8.83974 | 1.27989 | 0.356015 | 1.27989 |
| C030006K11Rik | NM_145472         | 0.000465 | 10.499  | 7.2763  | 6.92117 | 1.2791  | 0.355134 | 1.2791  |
| Ftsjd2        | NM_028791         | 0.004651 | 5.71023 | 9.11833 | 8.76552 | 1.27704 | 0.352808 | 1.27704 |
| Nhlrc2        | NM_025811         | 0.004222 | 5.86422 | 8.28695 | 7.93424 | 1.27696 | 0.352711 | 1.27696 |
|               | ---               | 0.003698 | 6.08022 | 3.02395 | 2.67127 | 1.27693 | 0.352685 | 1.27693 |
| 1810030O07Rik | BC137660          | 0.001137 | 8.32615 | 8.80991 | 8.45734 | 1.27684 | 0.352575 | 1.27684 |
|               | ---               | 0.00442  | 5.7908  | 11.4714 | 11.1189 | 1.27679 | 0.352516 | 1.27679 |
| Oaz1          | NM_008753         | 1.75E-06 | 42.9979 | 11.4789 | 11.1276 | 1.27571 | 0.351304 | 1.27571 |
| Smarca5       | NM_053124         | 0.003432 | 6.20483 | 9.48609 | 9.13577 | 1.27484 | 0.350319 | 1.27484 |
| Rrp7a         | NM_029101         | 0.002148 | 7.03845 | 8.40466 | 8.0549  | 1.27435 | 0.349757 | 1.27435 |
| Eftud1        | NM_175317         | 0.00023  | 12.5833 | 8.06673 | 7.71776 | 1.27365 | 0.348967 | 1.27365 |
| Eif4a3        | NM_138669         | 3.68E-05 | 20.0135 | 9.28233 | 8.9364  | 1.27097 | 0.345929 | 1.27097 |
| Nupl1         | NM_170591         | 0.003378 | 6.23146 | 8.43468 | 8.08929 | 1.27049 | 0.345382 | 1.27049 |
| Smg7          | NM_001160257      | 0.004026 | 5.94083 | 7.90907 | 7.56375 | 1.27043 | 0.345314 | 1.27043 |
| Sdcbp2        | NM_145535         | 3.79E-05 | 19.8599 | 5.88069 | 5.5355  | 1.27032 | 0.345189 | 1.27032 |
| Chchd2        | NM_024166         | 0.004494 | 5.76461 | 10.7837 | 10.4402 | 1.2689  | 0.343578 | 1.2689  |
|               | ENSMUST0000003153 |          |         |         |         |         |          |         |
| Hnf1a         | 5                 | 0.001119 | 8.36003 | 8.11406 | 7.77056 | 1.26883 | 0.343501 | 1.26883 |
|               | ---               | 0.000971 | 8.67627 | 4.01239 | 3.66918 | 1.26857 | 0.343204 | 1.26857 |
| 2310003H01Rik | NM_027980         | 0.000425 | 10.7448 | 6.41726 | 6.07423 | 1.26842 | 0.343032 | 1.26842 |

|          | ENSMUST0000000919 |          |         |         |         |         |          |         |
|----------|-------------------|----------|---------|---------|---------|---------|----------|---------|
| Gm5965   | 1                 | 0.005031 | 5.58794 | 4.12288 | 3.78021 | 1.26811 | 0.342677 | 1.26811 |
| Taf10    | NM_020024         | 0.001893 | 7.27883 | 6.23153 | 5.88952 | 1.26752 | 0.34201  | 1.26752 |
| Agap3    | NM_139153         | 0.00192  | 7.25166 | 7.15404 | 6.81286 | 1.2668  | 0.341186 | 1.2668  |
|          | ---               | 0.004173 | 5.88286 | 5.09223 | 4.75149 | 1.26641 | 0.340741 | 1.26641 |
| Mett10d  | NM_026197         | 0.004175 | 5.8822  | 7.96561 | 7.6252  | 1.26612 | 0.340408 | 1.26612 |
| Map3k10  | NM_001081292      | 0.002141 | 7.04381 | 6.45483 | 6.11499 | 1.26561 | 0.339837 | 1.26561 |
| Mad111   | NM_010752         | 0.001502 | 7.73818 | 6.93482 | 6.59545 | 1.2652  | 0.339364 | 1.2652  |
| Nol9     | NM_028727         | 0.003975 | 5.96146 | 8.42889 | 8.08967 | 1.26507 | 0.339221 | 1.26507 |
| Hadha    | NM_178878         | 0.00708  | 5.08006 | 9.55085 | 9.21248 | 1.26433 | 0.33837  | 1.26433 |
| Sf3b1    | NM_031179         | 0.003653 | 6.10025 | 10.9683 | 10.6311 | 1.26324 | 0.337126 | 1.26324 |
| Rrp1     | NM_010925         | 0.002144 | 7.042   | 9.94504 | 9.60898 | 1.2623  | 0.336053 | 1.2623  |
| Trim26   | NM_001025599      | 6.29E-05 | 17.4787 | 6.60331 | 6.26751 | 1.26208 | 0.335805 | 1.26208 |
| Gm5072   | NM_001114678      | 0.00394  | 5.9758  | 3.65244 | 3.31823 | 1.26069 | 0.33421  | 1.26069 |
| Zdhhc6   | NM_001033573      | 9.41E-05 | 15.7841 | 8.60614 | 8.27246 | 1.26023 | 0.333688 | 1.26023 |
| Ctnnb1   | NM_025680         | 0.001942 | 7.22976 | 8.15111 | 7.81754 | 1.26013 | 0.333571 | 1.26013 |
| Anapc4   | NM_024213         | 0.002332 | 6.88544 | 9.55722 | 9.22367 | 1.26011 | 0.33355  | 1.26011 |
| Hspa4    | NM_008300         | 0.004325 | 5.82541 | 9.49686 | 9.1634  | 1.26003 | 0.333457 | 1.26003 |
| Ccl25    | NR_033527         | 0.006017 | 5.31728 | 6.24753 | 5.91421 | 1.25991 | 0.333323 | 1.25991 |
| Lce1h    | NM_026335         | 0.00355  | 6.14819 | 5.82335 | 5.49004 | 1.2599  | 0.333307 | 1.2599  |
| Agl      | NM_001081326      | 0.005928 | 5.33929 | 7.82182 | 7.48997 | 1.25863 | 0.331851 | 1.25863 |
| Mrps18b  | NM_025878         | 0.003017 | 6.42496 | 9.15748 | 8.82585 | 1.25844 | 0.331634 | 1.25844 |
| Oaz1     | NM_008753         | 0.000343 | 11.357  | 11.1831 | 10.8521 | 1.25785 | 0.330959 | 1.25785 |
| Chchd2   | NM_024166         | 0.003021 | 6.42274 | 11.2865 | 10.957  | 1.25659 | 0.329519 | 1.25659 |
| Atg9b    | NM_001002897      | 7.33E-05 | 16.8181 | 5.94634 | 5.61684 | 1.25658 | 0.329499 | 1.25658 |
| Slc4a1ap | NM_009206         | 0.001407 | 7.87341 | 7.4111  | 7.08173 | 1.25646 | 0.329366 | 1.25646 |
| Polr2c   | NM_009090         | 0.000774 | 9.20538 | 8.66063 | 8.33224 | 1.25561 | 0.328384 | 1.25561 |
| Gapdh    | GU214026          | 0.000941 | 8.74833 | 12.0959 | 11.7687 | 1.25458 | 0.32721  | 1.25458 |
| Gm5072   | NM_001114678      | 0.001454 | 7.80437 | 4.03068 | 3.70424 | 1.25392 | 0.326446 | 1.25392 |
| Rbm42    | NM_133693         | 0.003552 | 6.14709 | 7.92135 | 7.59597 | 1.25299 | 0.325379 | 1.25299 |
| Ppia     | NM_008907         | 0.003823 | 6.02542 | 12.393  | 12.0679 | 1.25276 | 0.32511  | 1.25276 |

|         |                   |          |         |         |         |         |          |         |
|---------|-------------------|----------|---------|---------|---------|---------|----------|---------|
| Atpaf2  | NM_145427         | 0.000735 | 9.32767 | 7.63804 | 7.31335 | 1.25239 | 0.324687 | 1.25239 |
| Mki67ip | NM_026472         | 0.000361 | 11.2093 | 8.74782 | 8.42377 | 1.25184 | 0.324049 | 1.25184 |
| Dhx15   | NM_007839         | 0.006343 | 5.23941 | 10.6987 | 10.3764 | 1.25034 | 0.322315 | 1.25034 |
| Prkcsh  | NM_008925         | 0.00269  | 6.62639 | 9.8035  | 9.48119 | 1.25033 | 0.32231  | 1.25033 |
| Chchd2  | NM_024166         | 0.004102 | 5.91061 | 11.0829 | 10.762  | 1.24912 | 0.320917 | 1.24912 |
| Rnh1    | NM_001172101      | 0.001071 | 8.45733 | 9.53836 | 9.21851 | 1.2482  | 0.319852 | 1.2482  |
|         | ---               | 0.002431 | 6.8093  | 8.06028 | 7.74217 | 1.2467  | 0.318109 | 1.2467  |
| Tomm34  | NM_025996         | 0.004171 | 5.88362 | 8.75829 | 8.44047 | 1.24645 | 0.317821 | 1.24645 |
| Ankrd46 | NM_175134         | 0.006374 | 5.23225 | 8.99774 | 8.68185 | 1.24478 | 0.315887 | 1.24478 |
| Casp6   | NM_009811         | 0.003949 | 5.97224 | 7.50474 | 7.18916 | 1.24451 | 0.315576 | 1.24451 |
| Megf8   | NM_001160400      | 0.00402  | 5.94335 | 7.70621 | 7.39106 | 1.24415 | 0.315156 | 1.24415 |
| Cops6   | NM_012002         | 0.006259 | 5.25894 | 9.64487 | 9.3302  | 1.24372 | 0.314664 | 1.24372 |
| Pomp    | NM_025624         | 0.006995 | 5.0975  | 10.4036 | 10.0896 | 1.24313 | 0.313975 | 1.24313 |
|         | ---               | 0.005417 | 5.47484 | 4.36769 | 4.05416 | 1.24274 | 0.31353  | 1.24274 |
| Atxn2   | NM_009125         | 0.001634 | 7.56787 | 8.54231 | 8.22918 | 1.2424  | 0.313135 | 1.2424  |
|         | ---               | 0.0014   | 7.88261 | 3.24416 | 2.93121 | 1.24225 | 0.312951 | 1.24225 |
|         | ENSMUST0000013103 |          |         |         |         |         |          |         |
| Rnf213  | 5                 | 0.004836 | 5.64945 | 7.28798 | 6.97605 | 1.24137 | 0.311928 | 1.24137 |
| Mfsd1   | NM_025813         | 0.001438 | 7.82789 | 10.6825 | 10.3731 | 1.23915 | 0.309351 | 1.23915 |
| Chd8    | NM_201637         | 0.001828 | 7.34632 | 8.26606 | 7.95774 | 1.23826 | 0.308317 | 1.23826 |
| Cspp1   | NM_026493         | 0.006423 | 5.22099 | 7.27843 | 6.97086 | 1.23762 | 0.307564 | 1.23762 |
| Scaf1   | NM_001008422      | 0.005807 | 5.37004 | 7.37697 | 7.07    | 1.2371  | 0.306965 | 1.2371  |
| Cpt1b   | NM_009948         | 0.004397 | 5.79914 | 5.68374 | 5.37724 | 1.2367  | 0.306498 | 1.2367  |
|         | ---               | 0.00073  | 9.34436 | 3.24545 | 2.93908 | 1.2366  | 0.306377 | 1.2366  |
| Coro1b  | NM_011778         | 0.004087 | 5.9166  | 10.4326 | 10.1276 | 1.23546 | 0.305047 | 1.23546 |
|         | ---               | 0.004829 | 5.6517  | 10.2606 | 9.95632 | 1.23484 | 0.30432  | 1.23484 |
| Rpl13a  | NM_009438         | 0.001519 | 7.71611 | 12.5718 | 12.2685 | 1.23395 | 0.303288 | 1.23395 |
| Edc4    | NM_181594         | 0.00391  | 5.9886  | 7.99511 | 7.69227 | 1.23357 | 0.302845 | 1.23357 |
| Nit1    | NR_033728         | 0.003258 | 6.29276 | 7.84955 | 7.54877 | 1.23181 | 0.300783 | 1.23181 |
| Zfp106  | NM_011743         | 0.002459 | 6.78856 | 8.29844 | 7.99821 | 1.23133 | 0.300221 | 1.23133 |
| Rnf168  | NM_027355         | 0.000863 | 8.94863 | 7.74195 | 7.44288 | 1.23035 | 0.299074 | 1.23035 |



|            |              |          |         |         |         |         |          |         |
|------------|--------------|----------|---------|---------|---------|---------|----------|---------|
| Zbtb2      | NM_001033466 | 0.001007 | 8.59493 | 6.7117  | 6.41271 | 1.23028 | 0.298983 | 1.23028 |
| Mrps15     | NM_025544    | 0.007005 | 5.09543 | 9.15115 | 8.85248 | 1.23001 | 0.298671 | 1.23001 |
| Tdg        | NM_172552    | 0.000869 | 8.93107 | 7.89041 | 7.59272 | 1.22918 | 0.297692 | 1.22918 |
| Vps37a     | NM_033560    | 0.000335 | 11.4259 | 7.53485 | 7.23885 | 1.22773 | 0.295999 | 1.22773 |
| Rbm33      | NM_028234    | 9.78E-05 | 15.6325 | 7.61128 | 7.3171  | 1.22618 | 0.294172 | 1.22618 |
| Ctu1       | NM_145582    | 0.006066 | 5.30519 | 6.22464 | 5.93054 | 1.22612 | 0.2941   | 1.22612 |
| Ppp5c      | NM_011155    | 0.002472 | 6.77867 | 9.62743 | 9.33359 | 1.2259  | 0.293838 | 1.2259  |
| Vmn2r-ps14 | NR_002888    | 0.002426 | 6.81276 | 9.6729  | 9.38031 | 1.22485 | 0.2926   | 1.22485 |
|            | ---          | 0.004895 | 5.63044 | 5.17686 | 4.88481 | 1.22438 | 0.292054 | 1.22438 |
| Dctn3      | NM_016890    | 0.002648 | 6.65494 | 8.02984 | 7.73988 | 1.2226  | 0.289957 | 1.2226  |
| Gapdh      | NM_008084    | 0.002912 | 6.4866  | 12.9568 | 12.668  | 1.22161 | 0.288789 | 1.22161 |
| Aspscr1    | NM_026877    | 0.005122 | 5.56028 | 8.22163 | 7.93317 | 1.22134 | 0.288464 | 1.22134 |
| Tyw1       | NM_001015876 | 0.006642 | 5.17227 | 7.52045 | 7.23233 | 1.22104 | 0.288116 | 1.22104 |
| Sumo2      | NM_133354    | 0.005027 | 5.58924 | 10.7293 | 10.4457 | 1.21724 | 0.283615 | 1.21724 |
|            | ---          | 0.000746 | 9.2941  | 9.98884 | 9.70569 | 1.21685 | 0.283153 | 1.21685 |
| R3hdm1     | NM_181750    | 0.003384 | 6.22874 | 7.55425 | 7.27166 | 1.21637 | 0.282584 | 1.21637 |
| Sh2b1      | NM_011363    | 0.002302 | 6.90899 | 7.47434 | 7.19278 | 1.21551 | 0.281561 | 1.21551 |
| Gm12070    | NR_002890    | 0.006098 | 5.29726 | 12.863  | 12.582  | 1.21507 | 0.281043 | 1.21507 |
| Spats1     | NM_027649    | 0.001265 | 8.09594 | 4.19433 | 3.91338 | 1.215   | 0.280951 | 1.215   |
| Mlf2       | NM_145385    | 0.000213 | 12.8205 | 10.0719 | 9.79237 | 1.21383 | 0.279566 | 1.21383 |
|            | ---          | 0.004923 | 5.62159 | 2.90862 | 2.62953 | 1.21343 | 0.279091 | 1.21343 |
| Fau        | NM_007990    | 0.006302 | 5.2489  | 10.878  | 10.6012 | 1.21147 | 0.276758 | 1.21147 |
| BC067068   | NM_207522    | 0.002899 | 6.49463 | 5.87714 | 5.60099 | 1.21096 | 0.276154 | 1.21096 |
| Eif4g2     | NM_013507    | 0.004357 | 5.81378 | 11.4551 | 11.18   | 1.21007 | 0.275089 | 1.21007 |
| AW209491   | NM_134067    | 0.005719 | 5.39294 | 6.52754 | 6.25264 | 1.20991 | 0.274899 | 1.20991 |
| Abce1      | NM_015751    | 0.001328 | 7.99356 | 10.413  | 10.1388 | 1.20933 | 0.274213 | 1.20933 |
| Dvl3       | NM_007889    | 0.006873 | 5.12282 | 7.22317 | 6.94954 | 1.20884 | 0.273629 | 1.20884 |
| Cdc73      | NM_145991    | 0.003508 | 6.16809 | 8.77441 | 8.50204 | 1.20779 | 0.272369 | 1.20779 |
| D19Wsu162e | NM_001177812 | 0.005085 | 5.57149 | 9.30656 | 9.03461 | 1.20745 | 0.271958 | 1.20745 |
| Mast4      | NM_175171    | 0.00391  | 5.98858 | 7.1621  | 6.89047 | 1.20717 | 0.271631 | 1.20717 |
| Qars       | NM_133794    | 0.005824 | 5.36565 | 9.88122 | 9.60964 | 1.20713 | 0.271576 | 1.20713 |

|          |              |          |         |         |         |         |          |         |
|----------|--------------|----------|---------|---------|---------|---------|----------|---------|
| Ctbp1    | NM_013502    | 0.000684 | 9.50336 | 9.51591 | 9.24807 | 1.20401 | 0.267844 | 1.20401 |
| Eif4e    | NM_007917    | 0.002884 | 6.50345 | 10.2285 | 9.96267 | 1.20229 | 0.265786 | 1.20229 |
| Zfp507   | NM_177739    | 0.001437 | 7.82988 | 8.1631  | 7.90276 | 1.19776 | 0.260335 | 1.19776 |
|          | ---          | 0.006174 | 5.27896 | 3.72651 | 3.46694 | 1.19712 | 0.259573 | 1.19712 |
|          | ---          | 0.004116 | 5.90504 | 6.84686 | 6.58801 | 1.19652 | 0.258848 | 1.19652 |
| Serpinb7 | NM_027548    | 0.00057  | 9.96473 | 2.76385 | 2.50618 | 1.19555 | 0.257679 | 1.19555 |
| Al894139 | NM_178898    | 0.000411 | 10.8405 | 5.52249 | 5.26685 | 1.19386 | 0.255638 | 1.19386 |
| Brd8     | NM_030147    | 0.004651 | 5.71031 | 7.79185 | 7.53626 | 1.19383 | 0.255593 | 1.19383 |
| Fam168a  | BC079886     | 0.000565 | 9.98737 | 7.449   | 7.19484 | 1.19264 | 0.254159 | 1.19264 |
| Tmco7    | NM_173037    | 0.001563 | 7.65811 | 6.53026 | 6.27625 | 1.19252 | 0.254015 | 1.19252 |
| Gm13637  | XM_911155    | 6.87E-05 | 17.093  | 4.81622 | 4.56381 | 1.1912  | 0.25241  | 1.1912  |
| Nudt9    | NM_028794    | 0.004604 | 5.72642 | 8.77828 | 8.52631 | 1.19084 | 0.251976 | 1.19084 |
| Rpl41    | NM_018860    | 0.005714 | 5.39415 | 11.42   | 11.1681 | 1.19079 | 0.251919 | 1.19079 |
| Rpl41    | NM_018860    | 0.005714 | 5.39415 | 11.42   | 11.1681 | 1.19079 | 0.251919 | 1.19079 |
| Rpl41    | NM_018860    | 0.005714 | 5.39415 | 11.42   | 11.1681 | 1.19079 | 0.251919 | 1.19079 |
| Sufu     | NM_015752    | 0.000665 | 9.57407 | 7.07786 | 6.82678 | 1.1901  | 0.251081 | 1.1901  |
| Srsf10   | NM_001080387 | 0.004131 | 5.89905 | 9.96163 | 9.71091 | 1.1898  | 0.250724 | 1.1898  |
|          | ---          | 0.000412 | 10.8297 | 3.47758 | 3.22746 | 1.18931 | 0.25012  | 1.18931 |
| Rnf41    | NM_001164237 | 0.004658 | 5.70789 | 7.90005 | 7.65073 | 1.18864 | 0.249313 | 1.18864 |
| Sepn1    | NM_029100    | 0.000531 | 10.1457 | 7.22454 | 6.97555 | 1.18837 | 0.24899  | 1.18837 |
| Mfap3    | NM_145426    | 0.005419 | 5.47415 | 8.26271 | 8.01488 | 1.18742 | 0.247825 | 1.18742 |
| Srsf11   | NM_001093752 | 0.000455 | 10.5589 | 8.90873 | 8.66216 | 1.18638 | 0.246563 | 1.18638 |
| BC002230 | NM_183155    | 0.005253 | 5.52175 | 7.06031 | 6.81551 | 1.18494 | 0.24481  | 1.18494 |
| Gm10046  | NR_033484    | 0.006919 | 5.11306 | 5.85614 | 5.6156  | 1.18143 | 0.240538 | 1.18143 |
| Ube2d3   | NM_025356    | 0.000999 | 8.61312 | 11.6271 | 11.3872 | 1.18086 | 0.239832 | 1.18086 |
| Olf1034  | NM_001011872 | 0.001887 | 7.28498 | 3.15799 | 2.91916 | 1.18003 | 0.238829 | 1.18003 |
| Gira1    | NM_020492    | 0.003948 | 5.97268 | 3.78758 | 3.5493  | 1.17958 | 0.238273 | 1.17958 |
| Dld      | NM_007861    | 0.005647 | 5.41211 | 9.45519 | 9.21711 | 1.17942 | 0.238078 | 1.17942 |
|          | ---          | 0.005495 | 5.45321 | 2.57443 | 2.33637 | 1.1794  | 0.238054 | 1.1794  |
| Rnf4     | NM_011278    | 0.003257 | 6.29338 | 10.5499 | 10.3156 | 1.17633 | 0.234299 | 1.17633 |
| Ces2b    | NM_198171    | 0.005502 | 5.45134 | 4.07172 | 3.83756 | 1.17622 | 0.234159 | 1.17622 |

|               |              |          |         |         |         |         |          |         |
|---------------|--------------|----------|---------|---------|---------|---------|----------|---------|
|               | ---          | 0.003551 | 6.14741 | 3.35279 | 3.1214  | 1.17396 | 0.231384 | 1.17396 |
|               | ---          | 0.005821 | 5.36642 | 5.82903 | 5.59931 | 1.1726  | 0.229714 | 1.1726  |
|               | ---          | 0.002294 | 6.91566 | 5.85052 | 5.62208 | 1.17157 | 0.228439 | 1.17157 |
|               | ---          | 0.006852 | 5.12717 | 2.94339 | 2.71544 | 1.17117 | 0.227954 | 1.17117 |
| Clns1a        | NM_023671    | 0.006735 | 5.15213 | 8.31579 | 8.09367 | 1.16645 | 0.222123 | 1.16645 |
|               | ---          | 0.004206 | 5.87028 | 5.84773 | 5.62577 | 1.16632 | 0.221963 | 1.16632 |
|               | ---          | 0.002482 | 6.77128 | 5.82591 | 5.60418 | 1.16614 | 0.221735 | 1.16614 |
|               | ---          | 0.002482 | 6.77128 | 5.82591 | 5.60418 | 1.16614 | 0.221735 | 1.16614 |
|               | ---          | 0.002482 | 6.77128 | 5.82591 | 5.60418 | 1.16614 | 0.221735 | 1.16614 |
|               | ---          | 0.002482 | 6.77128 | 5.82591 | 5.60418 | 1.16614 | 0.221735 | 1.16614 |
| Mapk1ip1      | NM_001045483 | 0.007001 | 5.09615 | 6.61269 | 6.39514 | 1.16276 | 0.217551 | 1.16276 |
| Raly          | NM_001139513 | 0.002897 | 6.49551 | 9.46514 | 9.24811 | 1.16234 | 0.217037 | 1.16234 |
| E4f1          | NM_007893    | 0.004858 | 5.64241 | 7.8338  | 7.61694 | 1.1622  | 0.216861 | 1.1622  |
| Slc15a5       | NM_177787    | 0.003967 | 5.96493 | 4.59709 | 4.38268 | 1.16023 | 0.214411 | 1.16023 |
| Nop14         | NM_029278    | 0.000478 | 10.4251 | 9.0134  | 8.80423 | 1.15602 | 0.209171 | 1.15602 |
| Slc10a7       | NM_029736    | 0.006053 | 5.30843 | 7.42683 | 7.21779 | 1.15592 | 0.209038 | 1.15592 |
| Tmem49        | NM_029478    | 0.002166 | 7.02243 | 10.2515 | 10.0464 | 1.15276 | 0.205088 | 1.15276 |
| Gm5177        | NR_033630    | 0.000591 | 9.87039 | 11.8775 | 11.6753 | 1.15044 | 0.202189 | 1.15044 |
| Gm8994        | NM_001142734 | 0.004334 | 5.82225 | 5.50843 | 5.30913 | 1.14814 | 0.199298 | 1.14814 |
|               | ---          | 0.001782 | 7.39655 | 2.81325 | 2.62092 | 1.1426  | 0.192325 | 1.1426  |
| Flad1         | NM_177041    | 0.005698 | 5.39856 | 6.24518 | 6.05447 | 1.14133 | 0.190711 | 1.14133 |
| Cttnbp2nl     | NM_030249    | 0.006833 | 5.13122 | 7.29713 | 7.11024 | 1.13831 | 0.18689  | 1.13831 |
| 1700024P16Rik | NM_001162980 | 0.00062  | 9.75004 | 3.54951 | 3.36512 | 1.13634 | 0.184395 | 1.13634 |
| Rnf103        | NM_009543    | 0.003861 | 6.00895 | 8.07305 | 7.88895 | 1.13611 | 0.184103 | 1.13611 |
| Wdr18         | NM_175450    | 0.006606 | 5.18002 | 8.05832 | 7.87861 | 1.13265 | 0.179708 | 1.13265 |
| Ube2d3        | NM_025356    | 0.004364 | 5.81111 | 11.4565 | 11.2778 | 1.13181 | 0.178632 | 1.13181 |
| Amfr          | NM_011787    | 0.004289 | 5.83882 | 4.86822 | 4.69709 | 1.12594 | 0.171131 | 1.12594 |
| Phf1          | NM_013629    | 0.005011 | 5.59407 | 7.192   | 7.02564 | 1.12222 | 0.166357 | 1.12222 |
|               | ---          | 0.002793 | 6.56    | 5.4237  | 5.26298 | 1.11785 | 0.160723 | 1.11785 |
| Rnf187        | NM_022423    | 0.004449 | 5.78051 | 8.8041  | 8.64468 | 1.11684 | 0.159422 | 1.11684 |
|               | ---          | 0.000748 | 9.28668 | 4.4568  | 4.29838 | 1.11607 | 0.158426 | 1.11607 |

|               |              |          |          |         |         |          |          |          |
|---------------|--------------|----------|----------|---------|---------|----------|----------|----------|
| Olf1r723      | NM_001011530 | 0.005359 | 5.49123  | 3.58017 | 3.42488 | 1.11365  | 0.15529  | 1.11365  |
| Mageb18       | NM_173783    | 0.003796 | 6.03714  | 3.09643 | 2.9438  | 1.11159  | 0.152624 | 1.11159  |
|               | ---          | 0.002963 | 6.45628  | 2.7949  | 2.6436  | 1.11057  | 0.151299 | 1.11057  |
| Zfp397        | NM_027007    | 0.006467 | 5.21097  | 7.743   | 7.59502 | 1.10802  | 0.147981 | 1.10802  |
| Bloc1s3       | NM_177692    | 0.002381 | 6.84745  | 7.90172 | 7.75639 | 1.10599  | 0.145332 | 1.10599  |
| Slc25a34      | NM_001013780 | 0.002215 | 6.98103  | 5.11254 | 4.97889 | 1.09706  | 0.133643 | 1.09706  |
| 4921521F21Rik | BC051128     | 0.000737 | 9.32099  | 3.53419 | 3.40514 | 1.09357  | 0.129043 | 1.09357  |
| Llgl1         | NM_008502    | 0.005481 | 5.45708  | 7.38207 | 7.25949 | 1.08869  | 0.122589 | 1.08869  |
| Imm1p1        | NM_028260    | 0.004161 | 5.88756  | 4.1676  | 4.04503 | 1.08868  | 0.122576 | 1.08868  |
| Heph1         | NM_001164797 | 0.003144 | 6.35409  | 3.38444 | 3.2688  | 1.08345  | 0.115638 | 1.08345  |
| Adam3         | NM_009619    | 0.002053 | 7.12374  | 3.41739 | 3.30736 | 1.07925  | 0.110031 | 1.07925  |
| Gypa          | NM_010369    | 0.005716 | 5.3938   | 2.84613 | 2.73945 | 1.07675  | 0.106687 | 1.07675  |
|               | ---          | 0.004695 | 5.69571  | 4.51181 | 4.41516 | 1.06929  | 0.09665  | 1.06929  |
| Olf1r1257     | NM_146982    | 0.005505 | 5.4503   | 2.92327 | 2.82831 | 1.06804  | 0.09496  | 1.06804  |
| Mir106a       | NR_029657    | 0.004678 | -5.70142 | 2.65739 | 2.74192 | 0.943089 | -0.08453 | -1.06035 |
| Sdccag3       | NM_026563    | 0.004927 | -5.62031 | 7.65128 | 7.73847 | 0.941357 | -0.08719 | -1.0623  |
| Spam1         | NM_001079875 | 0.003636 | -6.10804 | 2.65983 | 2.74903 | 0.940043 | -0.0892  | -1.06378 |
| Olf1r994      | NM_146433    | 0.006914 | -5.11427 | 2.6584  | 2.74832 | 0.939571 | -0.08993 | -1.06432 |
|               | ---          | 0.002157 | -7.02981 | 2.8058  | 2.90289 | 0.934914 | -0.0971  | -1.06962 |
|               | ---          | 0.005722 | -5.39216 | 2.95877 | 3.05897 | 0.932907 | -0.1002  | -1.07192 |
| 8030411F24Rik | NM_030135    | 0.001362 | -7.94123 | 3.26259 | 3.36738 | 0.929941 | -0.10479 | -1.07534 |
| Fam32a        | NM_026455    | 0.00505  | -5.58232 | 8.12597 | 8.2533  | 0.915526 | -0.12733 | -1.09227 |
| Galnt16       | NM_175032    | 0.005876 | -5.35257 | 3.90037 | 4.03175 | 0.912958 | -0.13138 | -1.09534 |
| Ak4           | NM_001177602 | 0.00019  | -13.1999 | 6.03268 | 6.16619 | 0.911609 | -0.13351 | -1.09696 |
| Wfikkn2       | NM_181819    | 0.004844 | -5.64662 | 4.02248 | 4.16576 | 0.905454 | -0.14329 | -1.10442 |
| Olf1r376      | NM_001172686 | 0.000791 | -9.15134 | 3.15902 | 3.30414 | 0.904301 | -0.14513 | -1.10583 |
| Ube2d2        | NM_019912    | 0.001833 | -7.34118 | 9.19007 | 9.33638 | 0.903556 | -0.14631 | -1.10674 |
| Tbc1d9b       | NM_029745    | 0.003081 | -6.38846 | 7.94346 | 8.09341 | 0.901281 | -0.14995 | -1.10953 |
| Isy1          | NM_133934    | 0.005285 | -5.51241 | 7.83386 | 7.98529 | 0.900355 | -0.15144 | -1.11067 |
|               | ---          | 0.002278 | -6.92826 | 3.76713 | 3.92322 | 0.897453 | -0.15609 | -1.11426 |
| Cyp4f39       | NM_177307    | 0.002142 | -7.04291 | 3.7743  | 3.93112 | 0.897    | -0.15682 | -1.11483 |

|               |                                   |          |          |         |         |          |          |          |
|---------------|-----------------------------------|----------|----------|---------|---------|----------|----------|----------|
| Zfp408        | NM_001033451<br>ENSMUST0000010333 | 0.003618 | -6.11668 | 6.15439 | 6.31234 | 0.896297 | -0.15795 | -1.1157  |
| Gm459         | 7                                 | 0.003203 | -6.32186 | 4.45223 | 4.61093 | 0.895835 | -0.1587  | -1.11628 |
| Olfr1219      | NM_146899                         | 0.004079 | -5.91972 | 3.01043 | 3.16948 | 0.895616 | -0.15905 | -1.11655 |
| Gm5820        | NM_001033789                      | 0.000179 | -13.4059 | 3.92534 | 4.08545 | 0.894956 | -0.16011 | -1.11737 |
| Olfr1509      | NM_020514                         | 0.005122 | -5.56029 | 2.77962 | 2.94253 | 0.893222 | -0.16291 | -1.11954 |
|               | ---                               | 0.005075 | -5.57455 | 2.49032 | 2.67187 | 0.881757 | -0.18155 | -1.1341  |
| Olfr1066      | NM_001011735                      | 0.002953 | -6.46251 | 2.50045 | 2.68553 | 0.879598 | -0.18508 | -1.13688 |
| Tmem18        | NM_172049                         | 0.00077  | -9.21728 | 8.14395 | 8.33045 | 0.878738 | -0.1865  | -1.138   |
|               | ---                               | 0.001461 | -7.79454 | 6.62123 | 6.80962 | 0.87758  | -0.1884  | -1.1395  |
| Atp9b         | NM_015805                         | 0.000158 | -13.8499 | 7.89204 | 8.08121 | 0.87711  | -0.18917 | -1.14011 |
|               | ---                               | 0.001629 | -7.57403 | 3.46656 | 3.65607 | 0.876905 | -0.18951 | -1.14038 |
|               | ---                               | 0.004191 | -5.87583 | 3.33575 | 3.52532 | 0.876868 | -0.18957 | -1.14042 |
| Mir379        | NR_029880                         | 0.001109 | -8.3809  | 2.62965 | 2.82432 | 0.873772 | -0.19467 | -1.14446 |
|               | ---                               | 0.001914 | -7.25714 | 2.56822 | 2.76305 | 0.873674 | -0.19483 | -1.14459 |
| Naa35         | NM_030153                         | 0.004183 | -5.87908 | 8.74231 | 8.94168 | 0.87093  | -0.19937 | -1.1482  |
|               | ---                               | 0.003111 | -6.37184 | 4.94273 | 5.14287 | 0.870466 | -0.20014 | -1.14881 |
| Cox16         | NM_025461                         | 0.003429 | -6.20648 | 6.13772 | 6.33845 | 0.87011  | -0.20073 | -1.14928 |
|               | ---                               | 0.002521 | -6.74285 | 3.29222 | 3.49634 | 0.868072 | -0.20411 | -1.15198 |
| Tal1          | NM_011527                         | 0.004487 | -5.76688 | 5.4998  | 5.70393 | 0.868059 | -0.20414 | -1.152   |
| Ndfip2        | NM_029561                         | 0.003594 | -6.12767 | 8.00882 | 8.21344 | 0.867766 | -0.20462 | -1.15238 |
|               | ---                               | 0.002487 | -6.76802 | 7.54181 | 7.74645 | 0.867753 | -0.20464 | -1.1524  |
| Nek9          | NM_145138                         | 0.007094 | -5.0774  | 8.80371 | 9.00953 | 0.867048 | -0.20582 | -1.15334 |
| Tnfsf4        | NM_009452                         | 0.000797 | -9.13557 | 3.43005 | 3.63754 | 0.866041 | -0.20749 | -1.15468 |
| Ppm1a         | NM_008910                         | 0.00502  | -5.59129 | 8.61893 | 8.82711 | 0.865627 | -0.20818 | -1.15523 |
| Hbxip         | NM_026774                         | 0.003735 | -6.06383 | 7.73191 | 7.9435  | 0.863584 | -0.21159 | -1.15797 |
| Trappc2       | NM_025432                         | 0.006608 | -5.17959 | 7.95413 | 8.16615 | 0.863329 | -0.21202 | -1.15831 |
| Atg4a         | NM_174875<br>ENSMUST0000004335    | 0.006447 | -5.21563 | 7.5565  | 7.76974 | 0.862597 | -0.21324 | -1.15929 |
| Tmem156       | 2                                 | 0.000462 | -10.5168 | 2.94589 | 3.16231 | 0.860698 | -0.21642 | -1.16185 |
|               | ---                               | 0.005656 | -5.40958 | 5.36884 | 5.58801 | 0.85906  | -0.21917 | -1.16406 |
| 9430053O09Rik | AK140789                          | 0.006114 | -5.29358 | 3.16526 | 3.38617 | 0.85802  | -0.22092 | -1.16547 |

|               |                   |          |          |         |         |          |          |          |
|---------------|-------------------|----------|----------|---------|---------|----------|----------|----------|
| Ttc17         | NM_183106         | 0.000799 | -9.12963 | 7.74866 | 7.96965 | 0.857979 | -0.22099 | -1.16553 |
|               | ---               | 0.00621  | -5.2704  | 2.55869 | 2.7799  | 0.857846 | -0.22121 | -1.16571 |
| Rps2          | NM_008503         | 0.006978 | -5.10086 | 12.5853 | 12.807  | 0.857534 | -0.22174 | -1.16614 |
|               | ---               | 0.000431 | -10.7112 | 5.08821 | 5.31003 | 0.857488 | -0.22181 | -1.1662  |
| Morf4l1       | NM_001039147      | 0.005906 | -5.34474 | 11.0763 | 11.2987 | 0.857146 | -0.22239 | -1.16666 |
| Tmem29        | NM_001164684      | 0.000585 | -9.89538 | 4.15064 | 4.37432 | 0.856382 | -0.22367 | -1.1677  |
| Gm10445       | ENSMUST0000010122 |          |          |         |         |          |          |          |
|               | 9                 | 0.005279 | -5.51405 | 4.18342 | 4.41328 | 0.852718 | -0.22986 | -1.17272 |
| Slc17a4       | NM_177016         | 0.001251 | -8.11959 | 3.58005 | 3.8131  | 0.850833 | -0.23305 | -1.17532 |
|               | ---               | 0.002203 | -6.99042 | 12.8278 | 13.0619 | 0.850205 | -0.23412 | -1.17619 |
| Tysnd1        | NM_027912         | 0.001924 | -7.24761 | 7.49788 | 7.73229 | 0.85003  | -0.23441 | -1.17643 |
|               | 10-Mar NM_172568  | 0.002826 | -6.53931 | 3.74095 | 3.97695 | 0.849096 | -0.236   | -1.17772 |
| Olf472        | NM_146774         | 0.001088 | -8.42276 | 2.28264 | 2.51964 | 0.848508 | -0.237   | -1.17854 |
| P2rx5         | NM_033321         | 0.002002 | -7.17084 | 4.99044 | 5.22766 | 0.848378 | -0.23722 | -1.17872 |
| Supv3l1       | NM_181423         | 0.00037  | -11.1351 | 6.769   | 7.00991 | 0.846209 | -0.24091 | -1.18174 |
| Fbxl3         | NM_015822         | 0.006197 | -5.27356 | 8.3301  | 8.57338 | 0.844825 | -0.24328 | -1.18368 |
| Gnpda1        | NM_011937         | 0.000583 | -9.90476 | 7.2499  | 7.49388 | 0.844414 | -0.24398 | -1.18425 |
| Wdr34         | NM_001008498      | 0.004419 | -5.79121 | 7.45822 | 7.70245 | 0.844266 | -0.24423 | -1.18446 |
| Klhl20        | NM_001039482      | 0.003397 | -6.22227 | 7.35477 | 7.59932 | 0.844081 | -0.24455 | -1.18472 |
| Stac          | NM_016853         | 0.006722 | -5.15491 | 4.00346 | 4.24816 | 0.843991 | -0.2447  | -1.18485 |
|               | ---               | 0.003964 | -5.96594 | 3.71677 | 3.9619  | 0.843741 | -0.24513 | -1.1852  |
| 4930408F14Rik | BC117727          | 0.002884 | -6.50352 | 5.92565 | 6.1709  | 0.843668 | -0.24525 | -1.1853  |
| Mcm3ap        | NM_019434         | 0.005967 | -5.32953 | 6.79789 | 7.04331 | 0.843566 | -0.24543 | -1.18544 |
| Timm13        | NM_013895         | 8.69E-05 | -16.1092 | 7.86914 | 8.11662 | 0.842365 | -0.24748 | -1.18713 |
| Pdcd6         | NM_011051         | 8.03E-05 | -16.4309 | 8.0319  | 8.28384 | 0.839768 | -0.25194 | -1.19081 |
|               | ---               | 0.002334 | -6.88334 | 5.42828 | 5.68111 | 0.839247 | -0.25283 | -1.19154 |
| Csnk1a1       | NM_146087         | 0.004634 | -5.71625 | 10.2966 | 10.5515 | 0.838044 | -0.2549  | -1.19326 |
| Nckap1        | NM_016965         | 0.005061 | -5.57892 | 10.0416 | 10.2982 | 0.837053 | -0.25661 | -1.19467 |
| 4930403L05Rik | NR_033171         | 0.002153 | -7.03386 | 4.86537 | 5.1226  | 0.83669  | -0.25723 | -1.19519 |
| Gm626         | XM_985917         | 0.001269 | -8.09019 | 3.58112 | 3.83956 | 0.835989 | -0.25844 | -1.19619 |
| Atp5o         | NM_138597         | 0.000993 | -8.6268  | 8.49484 | 8.75585 | 0.834503 | -0.26101 | -1.19832 |

|               |                                   |          |          |         |         |          |          |          |
|---------------|-----------------------------------|----------|----------|---------|---------|----------|----------|----------|
| Ucn           | NM_021290                         | 0.002561 | -6.71467 | 5.39945 | 5.66055 | 0.834447 | -0.26111 | -1.1984  |
| Zfp592        | NM_178707                         | 0.002212 | -6.98287 | 7.19355 | 7.45489 | 0.834316 | -0.26133 | -1.19859 |
| Cacnb4        | NM_001037099<br>ENSMUST0000010334 | 0.004217 | -5.86604 | 3.93011 | 4.19249 | 0.833717 | -0.26237 | -1.19945 |
| Gm10880       | 4                                 | 0.001966 | -7.20581 | 3.65211 | 3.91631 | 0.832658 | -0.2642  | -1.20097 |
| Mir98         | NR_029753                         | 0.003725 | -6.068   | 3.59906 | 3.86492 | 0.831697 | -0.26587 | -1.20236 |
| Cdk16         | NM_011049                         | 0.003751 | -6.05675 | 7.96607 | 8.23365 | 0.830711 | -0.26758 | -1.20379 |
| Ysk4          | NM_011737                         | 5.38E-05 | -18.1828 | 3.46388 | 3.73221 | 0.830281 | -0.26833 | -1.20441 |
| Psmid9        | NM_026000                         | 0.005174 | -5.5449  | 7.73981 | 8.00837 | 0.830148 | -0.26856 | -1.2046  |
|               | ---                               | 0.005735 | -5.38883 | 2.29338 | 2.5624  | 0.829884 | -0.26902 | -1.20499 |
| Stx4a         | NM_009294                         | 0.004898 | -5.62964 | 8.38167 | 8.6507  | 0.829876 | -0.26903 | -1.205   |
| Hmcn1         | NM_001024720                      | 0.005197 | -5.53823 | 2.82991 | 3.10019 | 0.829162 | -0.27028 | -1.20604 |
| Cdc23         | NM_178347                         | 0.00079  | -9.15701 | 8.50266 | 8.77675 | 0.826971 | -0.27409 | -1.20923 |
| Kdelr1        | NM_133950                         | 0.003658 | -6.0984  | 8.94737 | 9.22192 | 0.826703 | -0.27456 | -1.20962 |
| Elov11        | NM_019422                         | 0.000764 | -9.23482 | 8.58929 | 8.8645  | 0.826328 | -0.27521 | -1.21017 |
| Med4          | NM_026119                         | 0.002982 | -6.44507 | 7.06483 | 7.34189 | 0.825269 | -0.27706 | -1.21173 |
| Speer4d       | NM_025759                         | 0.002226 | -6.97114 | 3.14649 | 3.42629 | 0.823707 | -0.2798  | -1.21402 |
| Mir708        | NR_030489                         | 0.000745 | -9.29467 | 3.53017 | 3.81077 | 0.823247 | -0.2806  | -1.2147  |
| Ttc39c        | NM_028341                         | 0.00094  | -8.7493  | 6.64333 | 6.92695 | 0.821529 | -0.28362 | -1.21724 |
| Sec61a2       | NM_021305                         | 0.004473 | -5.77192 | 8.64427 | 8.93192 | 0.819231 | -0.28766 | -1.22066 |
|               | ---                               | 0.003775 | -6.04594 | 6.84299 | 7.13167 | 0.818651 | -0.28868 | -1.22152 |
| Vmn2r43       | NM_198961                         | 0.001238 | -8.14285 | 4.02455 | 4.3134  | 0.81855  | -0.28886 | -1.22167 |
| Pafah1b2      | NM_008775                         | 0.006876 | -5.12216 | 9.28382 | 9.5754  | 0.817005 | -0.29158 | -1.22398 |
| Vps24         | NM_025783                         | 0.005978 | -5.32692 | 8.84067 | 9.13512 | 0.815379 | -0.29446 | -1.22642 |
| Prm1          | NM_013637                         | 0.001454 | -7.80549 | 4.55637 | 4.8511  | 0.81523  | -0.29472 | -1.22665 |
| Mir376c       | NR_030270                         | 0.004274 | -5.8443  | 2.31557 | 2.61099 | 0.814836 | -0.29542 | -1.22724 |
| Galnt11       | NM_144908                         | 0.004985 | -5.60217 | 7.53463 | 7.83219 | 0.813623 | -0.29757 | -1.22907 |
| Fbxl17        | NM_015794                         | 0.004454 | -5.77858 | 8.46213 | 8.76061 | 0.813108 | -0.29848 | -1.22985 |
| 2700062C07Rik | BC084681                          | 0.002281 | -6.92652 | 4.6813  | 4.98212 | 0.811793 | -0.30082 | -1.23184 |
| Lemd2         | NM_146075                         | 0.002041 | -7.13456 | 7.55321 | 7.8546  | 0.81147  | -0.30139 | -1.23233 |
| Snap23        | NM_001177792                      | 0.00343  | -6.20575 | 8.71625 | 9.01774 | 0.811415 | -0.30149 | -1.23242 |

|               |                   |          |          |         |         |          |          |          |
|---------------|-------------------|----------|----------|---------|---------|----------|----------|----------|
| Ptges2        | NM_133783         | 0.006328 | -5.24279 | 6.51989 | 6.82192 | 0.811109 | -0.30203 | -1.23288 |
| Dpp8          | NM_028906         | 0.005983 | -5.32551 | 8.55403 | 8.8565  | 0.810862 | -0.30247 | -1.23326 |
| Nek4          | NM_011849         | 0.00681  | -5.13595 | 6.17493 | 6.47889 | 0.810023 | -0.30397 | -1.23453 |
| Morf4l1       | NM_001039147      | 0.00125  | -8.12244 | 7.52746 | 7.83202 | 0.809691 | -0.30456 | -1.23504 |
| Cox7c         | NM_007749         | 0.006759 | -5.14684 | 9.48362 | 9.79061 | 0.808327 | -0.30699 | -1.23712 |
| Med10         | NM_138596         | 0.002234 | -6.96477 | 8.75426 | 9.06367 | 0.806974 | -0.30941 | -1.2392  |
| BC089597      | NM_145424         | 0.0009   | -8.84926 | 4.06328 | 4.37333 | 0.806615 | -0.31005 | -1.23975 |
| Ttc37         | NM_001081352      | 0.004019 | -5.94379 | 8.11823 | 8.42887 | 0.806286 | -0.31064 | -1.24025 |
|               | ---               | 0.000478 | -10.4263 | 2.95148 | 3.26235 | 0.806156 | -0.31087 | -1.24045 |
|               | ENSMUST0000007022 |          |          |         |         |          |          |          |
| A230051N06Rik | 5                 | 0.00308  | -6.38937 | 4.30771 | 4.6189  | 0.805978 | -0.31119 | -1.24073 |
| Speer4e       | NM_001122661      | 0.005525 | -5.44496 | 3.01749 | 3.32946 | 0.805544 | -0.31197 | -1.2414  |
| Bcl6b         | NM_007528         | 0.003044 | -6.40974 | 4.60599 | 4.9189  | 0.805019 | -0.31291 | -1.24221 |
|               | ---               | 0.005201 | -5.53697 | 2.33941 | 2.65338 | 0.804423 | -0.31397 | -1.24313 |
| Rgs22         | NM_001195748      | 0.00024  | -12.4359 | 3.61358 | 3.9281  | 0.804123 | -0.31451 | -1.24359 |
| Slc25a29      | NM_181328         | 0.006293 | -5.25091 | 5.88607 | 6.20114 | 0.803817 | -0.31506 | -1.24406 |
| Nap1l4        | NM_008672         | 0.000336 | -11.4169 | 9.26947 | 9.58699 | 0.802444 | -0.31753 | -1.24619 |
| Rab8b         | NM_173413         | 0.001148 | -8.30592 | 8.74791 | 9.06577 | 0.802261 | -0.31786 | -1.24648 |
| Gcg           | NM_008100         | 0.000504 | -10.2871 | 3.41747 | 3.73618 | 0.801787 | -0.31871 | -1.24721 |
| Wwp1          | NM_177327         | 0.002214 | -6.98167 | 7.52401 | 7.84296 | 0.801653 | -0.31895 | -1.24742 |
| Ica1l         | NM_027407         | 0.001157 | -8.28728 | 3.61336 | 3.93442 | 0.800483 | -0.32106 | -1.24925 |
| Smad4         | NM_008540         | 0.000228 | -12.6044 | 9.1324  | 9.45457 | 0.799862 | -0.32218 | -1.25022 |
|               | ---               | 0.000494 | -10.337  | 4.89642 | 5.22008 | 0.79904  | -0.32366 | -1.2515  |
| Psm14         | NM_021526         | 0.003622 | -6.11452 | 8.58837 | 8.91299 | 0.798511 | -0.32462 | -1.25233 |
| Mbtps1        | NM_019709         | 0.003179 | -6.33484 | 9.99212 | 10.3168 | 0.798494 | -0.32465 | -1.25236 |
| Ulk4          | NM_177589         | 0.002329 | -6.88761 | 4.89298 | 5.21775 | 0.798424 | -0.32477 | -1.25247 |
| Agbl2         | NM_178755         | 0.00413  | -5.89954 | 3.41946 | 3.74506 | 0.797965 | -0.3256  | -1.25319 |
| Tmod2         | NM_016711         | 0.003416 | -6.21266 | 4.35183 | 4.67964 | 0.796742 | -0.32782 | -1.25511 |
| Tusc1         | NM_026954         | 0.002955 | -6.46101 | 6.77077 | 7.09912 | 0.796447 | -0.32835 | -1.25558 |
| H3f3a         | NM_008210         | 0.002373 | -6.85296 | 9.87916 | 10.2089 | 0.795697 | -0.32971 | -1.25676 |
| Psmc1         | NM_008947         | 0.005938 | -5.33671 | 8.65771 | 8.989   | 0.794827 | -0.33129 | -1.25814 |



|          |           |          |          |         |         |          |          |          |
|----------|-----------|----------|----------|---------|---------|----------|----------|----------|
|          | ---       | 0.001959 | -7.21263 | 12.2996 | 12.6335 | 0.793382 | -0.33391 | -1.26043 |
| H3f3a    | NM_008210 | 0.005269 | -5.51703 | 9.53024 | 9.86562 | 0.792579 | -0.33537 | -1.2617  |
| Osbpl5   | NM_024289 | 0.005718 | -5.39322 | 7.29916 | 7.63527 | 0.792172 | -0.33612 | -1.26235 |
| Plcb3    | NM_008874 | 0.005709 | -5.39564 | 7.83102 | 8.16814 | 0.791624 | -0.33711 | -1.26323 |
| Foxs1    | NM_010226 | 0.002744 | -6.59153 | 4.99453 | 5.33209 | 0.791376 | -0.33756 | -1.26362 |
| Gm10400  | NR_033555 | 0.001826 | -7.34869 | 3.49524 | 3.83315 | 0.791186 | -0.33791 | -1.26393 |
| Ankrd16  | NM_177268 | 0.001953 | -7.21854 | 6.66461 | 7.00345 | 0.79068  | -0.33884 | -1.26473 |
| Fsd1     | NM_183178 | 0.000768 | -9.22246 | 5.33545 | 5.67497 | 0.790308 | -0.33951 | -1.26533 |
| Fut4     | NM_010242 | 0.005533 | -5.44278 | 4.61458 | 4.9551  | 0.789755 | -0.34052 | -1.26622 |
| Shox2    | NM_013665 | 0.006341 | -5.23987 | 6.3889  | 6.72982 | 0.789535 | -0.34093 | -1.26657 |
| Bend3    | NM_199028 | 0.002524 | -6.74117 | 5.79021 | 6.13184 | 0.789147 | -0.34164 | -1.26719 |
| Setd3    | NM_028262 | 0.000167 | -13.6478 | 7.76485 | 8.10723 | 0.78874  | -0.34238 | -1.26785 |
|          | ---       | 0.003967 | -5.96468 | 2.36251 | 2.70564 | 0.78833  | -0.34313 | -1.2685  |
| Srp9     | NM_012058 | 0.002125 | -7.05798 | 8.57643 | 8.91998 | 0.788099 | -0.34355 | -1.26888 |
|          | ---       | 0.004388 | -5.80225 | 5.3012  | 5.64602 | 0.787409 | -0.34481 | -1.26999 |
| Gas2     | NM_008087 | 0.002008 | -7.16514 | 5.2795  | 5.62511 | 0.786972 | -0.34562 | -1.27069 |
|          | ---       | 0.00456  | -5.74157 | 6.81705 | 7.16297 | 0.786809 | -0.34591 | -1.27096 |
| Vkorc11  | NM_027121 | 0.005346 | -5.49479 | 8.20399 | 8.55239 | 0.785453 | -0.3484  | -1.27315 |
|          | ---       | 0.006775 | -5.14353 | 10.7051 | 11.0542 | 0.785067 | -0.34911 | -1.27378 |
| Cnpy2    | NM_019953 | 0.004176 | -5.8816  | 8.54424 | 8.89443 | 0.784476 | -0.3502  | -1.27474 |
| Fsip1    | NM_027759 | 0.000187 | -13.2654 | 3.80822 | 4.15859 | 0.784386 | -0.35037 | -1.27488 |
| Gm10012  | NR_028042 | 0.005216 | -5.5325  | 9.43126 | 9.78743 | 0.78124  | -0.35616 | -1.28002 |
| Rft1     | NM_177815 | 0.002744 | -6.59133 | 7.90525 | 8.26282 | 0.780482 | -0.35756 | -1.28126 |
| Tbrg1    | NM_025289 | 0.005935 | -5.33748 | 9.56965 | 9.92751 | 0.780319 | -0.35786 | -1.28153 |
|          | ---       | 0.00693  | -5.11091 | 4.20612 | 4.56469 | 0.779939 | -0.35857 | -1.28215 |
|          | ---       | 0.003845 | -6.0161  | 11.5256 | 11.885  | 0.779479 | -0.35942 | -1.28291 |
|          | ---       | 0.000745 | -9.29674 | 5.51105 | 5.87057 | 0.779423 | -0.35952 | -1.283   |
| Rcor1    | NM_198023 | 0.00034  | -11.3787 | 7.70474 | 8.0647  | 0.779185 | -0.35996 | -1.28339 |
| Ndufs6   | NM_010888 | 0.001943 | -7.22826 | 7.87008 | 8.23035 | 0.779021 | -0.36027 | -1.28366 |
| Ifi2712b | NM_145449 | 0.004299 | -5.83517 | 5.36767 | 5.72846 | 0.778742 | -0.36078 | -1.28412 |
| Cdca4    | NM_028023 | 0.00232  | -6.89455 | 8.24278 | 8.6057  | 0.777588 | -0.36292 | -1.28603 |

|               |              |          |          |         |         |          |          |          |
|---------------|--------------|----------|----------|---------|---------|----------|----------|----------|
|               | ---          | 0.003836 | -6.01996 | 2.94608 | 3.30921 | 0.777473 | -0.36314 | -1.28622 |
|               | ---          | 0.00016  | -13.8022 | 7.04048 | 7.40389 | 0.777323 | -0.36342 | -1.28647 |
| Smok2a        | NM_013741    | 0.003758 | -6.05358 | 3.31797 | 3.68339 | 0.776242 | -0.36542 | -1.28826 |
| Reep3         | NM_178606    | 0.005958 | -5.33176 | 8.15434 | 8.52051 | 0.775838 | -0.36617 | -1.28893 |
| Fam195b       | NM_001033231 | 0.000994 | -8.6232  | 8.71986 | 9.08833 | 0.774603 | -0.36847 | -1.29098 |
| Gm1673        | BC147444     | 0.00393  | -5.98    | 5.84824 | 6.21727 | 0.774307 | -0.36902 | -1.29148 |
| Rplp1         | NM_018853    | 0.001396 | -7.88965 | 12.5204 | 12.8934 | 0.77216  | -0.37303 | -1.29507 |
| Hiatl1        | NM_133680    | 0.001127 | -8.3462  | 8.26657 | 8.6403  | 0.771784 | -0.37373 | -1.2957  |
| Ghrl          | NM_021488    | 0.003119 | -6.36786 | 5.22271 | 5.59763 | 0.771146 | -0.37493 | -1.29677 |
| Pcdhb13       | NM_053138    | 4.32E-05 | -19.2165 | 4.37558 | 4.75051 | 0.771143 | -0.37493 | -1.29678 |
| 6430598A04Rik | NM_175521    | 0.002789 | -6.56252 | 4.62836 | 5.00645 | 0.769457 | -0.37809 | -1.29962 |
| Afg3l2        | NM_027130    | 0.000212 | -12.8458 | 8.1074  | 8.48593 | 0.769224 | -0.37852 | -1.30001 |
| Tmem70        | NM_027415    | 0.001745 | -7.43822 | 7.49337 | 7.87277 | 0.768757 | -0.3794  | -1.3008  |
| Taf9          | NM_027592    | 0.006327 | -5.24303 | 6.89389 | 7.27617 | 0.76722  | -0.38229 | -1.30341 |
| Dpm3          | NM_026767    | 0.00407  | -5.92318 | 6.75686 | 7.1395  | 0.767031 | -0.38264 | -1.30373 |
| Bicc1         | NM_031397    | 0.002007 | -7.1667  | 4.01094 | 4.39468 | 0.766446 | -0.38374 | -1.30472 |
| Olfr1006      | NM_146570    | 0.006555 | -5.19126 | 3.72759 | 4.11139 | 0.766416 | -0.3838  | -1.30477 |
|               | ---          | 0.002902 | -6.49264 | 10.4396 | 10.8236 | 0.76627  | -0.38408 | -1.30502 |
| Comtd1        | NM_026965    | 0.006319 | -5.24497 | 6.00089 | 6.38535 | 0.766065 | -0.38446 | -1.30537 |
|               | ---          | 0.006337 | -5.24067 | 11.5698 | 11.955  | 0.765695 | -0.38516 | -1.306   |
| Rxra          | NM_011305    | 0.005695 | -5.39919 | 6.66774 | 7.05377 | 0.765232 | -0.38603 | -1.30679 |
|               | ---          | 0.002702 | -6.61868 | 3.17149 | 3.55795 | 0.765005 | -0.38646 | -1.30718 |
| Elmo1         | NM_080288    | 0.005229 | -5.52867 | 3.62503 | 4.01174 | 0.764871 | -0.38671 | -1.30741 |
| Ppan          | NM_145610    | 0.002032 | -7.14315 | 7.37055 | 7.7573  | 0.764848 | -0.38676 | -1.30745 |
| Itsn1         | NM_010587    | 0.0011   | -8.39756 | 6.87023 | 7.2572  | 0.764731 | -0.38698 | -1.30765 |
|               | ---          | 0.00355  | -6.14807 | 8.79658 | 9.18474 | 0.764103 | -0.38816 | -1.30872 |
| Ppp6c         | NM_024209    | 0.000129 | -14.5853 | 7.95713 | 8.34537 | 0.76406  | -0.38824 | -1.3088  |
| Sec11a        | NM_019951    | 0.000937 | -8.75689 | 10.0053 | 10.3945 | 0.763591 | -0.38913 | -1.3096  |
|               | ---          | 0.004919 | -5.6229  | 7.76693 | 8.15642 | 0.7634   | -0.38949 | -1.30993 |
| Manea         | NM_172865    | 0.003884 | -5.99925 | 7.80973 | 8.19946 | 0.763274 | -0.38973 | -1.31015 |
|               | ---          | 0.007044 | -5.08738 | 8.3195  | 8.70953 | 0.763114 | -0.39003 | -1.31042 |

|               |              |          |          |         |         |          |          |          |
|---------------|--------------|----------|----------|---------|---------|----------|----------|----------|
| Hgsnat        | NM_029884    | 0.000342 | -11.3644 | 9.39888 | 9.78892 | 0.76311  | -0.39004 | -1.31043 |
| Gca           | NM_145523    | 0.001779 | -7.39937 | 3.1413  | 3.53149 | 0.763031 | -0.39019 | -1.31056 |
| Ahsa1         | NM_146036    | 0.005996 | -5.32242 | 8.80868 | 9.20087 | 0.761971 | -0.39219 | -1.31239 |
| D330045A20Rik | NM_175326    | 0.003435 | -6.2035  | 3.36026 | 3.75374 | 0.761293 | -0.39348 | -1.31355 |
| Oplah         | NM_153122    | 0.005878 | -5.35193 | 5.7606  | 6.15433 | 0.761157 | -0.39373 | -1.31379 |
| Arhgef6       | NM_152801    | 0.002764 | -6.57825 | 3.31159 | 3.70567 | 0.760977 | -0.39408 | -1.3141  |
| Cmpk2         | NM_020557    | 0.000308 | -11.674  | 3.26698 | 3.66191 | 0.760522 | -0.39494 | -1.31489 |
|               | ---          | 0.002543 | -6.72722 | 2.43811 | 2.8337  | 0.760181 | -0.39559 | -1.31548 |
| Pin4          | NM_027181    | 0.005368 | -5.48878 | 7.77095 | 8.16796 | 0.759431 | -0.39701 | -1.31677 |
|               | ---          | 0.005113 | -5.56311 | 10.0377 | 10.4358 | 0.758869 | -0.39808 | -1.31775 |
| Dock1         | NM_001033420 | 0.000407 | -10.8669 | 8.49967 | 8.89822 | 0.758623 | -0.39855 | -1.31818 |
| Ss18          | NM_009280    | 0.005151 | -5.55183 | 7.05169 | 7.45024 | 0.758622 | -0.39855 | -1.31818 |
| Ascc3         | NM_001146089 | 0.003383 | -6.22928 | 7.70402 | 8.10283 | 0.758481 | -0.39882 | -1.31842 |
| B230354O11Rik | AK046228     | 0.003612 | -6.11911 | 4.18625 | 4.58566 | 0.758171 | -0.3994  | -1.31896 |
| Mrrf          | NM_026422    | 0.001699 | -7.49093 | 8.15299 | 8.5532  | 0.75775  | -0.40021 | -1.3197  |
| Scarna13      | NR_028576    | 0.003923 | -5.98318 | 6.05721 | 6.46038 | 0.7562   | -0.40316 | -1.3224  |
| Prss12        | NM_008939    | 0.004872 | -5.63772 | 4.98632 | 5.39029 | 0.755777 | -0.40397 | -1.32314 |
| Hnrnpa0       | NM_029872    | 0.000972 | -8.67472 | 8.06571 | 8.47002 | 0.755598 | -0.40431 | -1.32346 |
| Rbms2         | NM_001039080 | 0.001419 | -7.85527 | 8.96664 | 9.3714  | 0.755364 | -0.40476 | -1.32386 |
| Amy2a5        | NM_001042711 | 0.003512 | -6.16626 | 3.05097 | 3.45618 | 0.755126 | -0.40521 | -1.32428 |
| Amy2a5        | NM_001042711 | 0.003512 | -6.16626 | 3.05097 | 3.45618 | 0.755126 | -0.40521 | -1.32428 |
| Amy2a5        | NM_001042711 | 0.003512 | -6.16626 | 3.05097 | 3.45618 | 0.755126 | -0.40521 | -1.32428 |
| Amy2a5        | NM_001042711 | 0.003512 | -6.16626 | 3.05097 | 3.45618 | 0.755126 | -0.40521 | -1.32428 |
| Hoxb3         | NM_001079869 | 0.003632 | -6.10982 | 5.81212 | 6.21777 | 0.754895 | -0.40565 | -1.32469 |
| Pdcd6ip       | NM_001164677 | 0.004113 | -5.90609 | 8.82604 | 9.23346 | 0.75397  | -0.40742 | -1.32631 |
| Mpzl1         | NM_001083897 | 0.001444 | -7.8192  | 8.1831  | 8.59151 | 0.753454 | -0.40841 | -1.32722 |
| Pin4          | NM_027181    | 0.00574  | -5.38738 | 7.90132 | 8.31082 | 0.752883 | -0.4095  | -1.32823 |
|               | ---          | 0.0048   | -5.66096 | 7.79517 | 8.20995 | 0.750135 | -0.41478 | -1.33309 |
| Dync2h1       | NM_029851    | 0.007098 | -5.07645 | 5.45384 | 5.86959 | 0.74963  | -0.41575 | -1.33399 |
| Ccdc114       | NM_001033243 | 0.003364 | -6.23841 | 4.13006 | 4.54733 | 0.748842 | -0.41727 | -1.3354  |
|               | ---          | 0.001685 | -7.50692 | 11.0534 | 11.4722 | 0.748058 | -0.41878 | -1.3368  |

|               |              |          |          |         |         |          |          |          |
|---------------|--------------|----------|----------|---------|---------|----------|----------|----------|
| Ttpa          | NM_015767    | 0.003733 | -6.06477 | 3.46446 | 3.88364 | 0.747849 | -0.41918 | -1.33717 |
| Fem1b         | NM_010193    | 0.007021 | -5.0921  | 8.14849 | 8.56823 | 0.747555 | -0.41975 | -1.33769 |
| Glrx2         | NM_001038592 | 0.003786 | -6.04132 | 9.52658 | 9.94636 | 0.747539 | -0.41978 | -1.33772 |
| Prss53        | NM_001081268 | 0.003092 | -6.38234 | 5.27944 | 5.69957 | 0.747357 | -0.42013 | -1.33805 |
| Slc4a7        | NM_001033270 | 0.006879 | -5.12142 | 7.06075 | 7.48116 | 0.747213 | -0.42041 | -1.33831 |
| Abcb10        | NM_019552    | 0.006043 | -5.31082 | 6.21557 | 6.63653 | 0.746929 | -0.42096 | -1.33882 |
| Tep1          | NM_009351    | 0.000804 | -9.11379 | 6.51365 | 6.93565 | 0.746389 | -0.422   | -1.33978 |
| Izumo4        | NM_027829    | 0.001088 | -8.42287 | 5.98913 | 6.41309 | 0.745374 | -0.42396 | -1.34161 |
| E130012A19Rik | BC055770     | 0.005522 | -5.44567 | 6.01246 | 6.43729 | 0.744923 | -0.42484 | -1.34242 |
| Dym           | NM_027727    | 0.004234 | -5.85935 | 7.54309 | 7.96804 | 0.744865 | -0.42495 | -1.34252 |
| Ttll9         | NM_001083618 | 0.003517 | -6.16383 | 4.47369 | 4.899   | 0.744678 | -0.42531 | -1.34286 |
| Daf2          | NM_007827    | 0.002404 | -6.82928 | 2.80976 | 3.23558 | 0.744418 | -0.42582 | -1.34333 |
| Hdac2         | NM_008229    | 0.005113 | -5.56311 | 9.24268 | 9.66864 | 0.744343 | -0.42596 | -1.34347 |
| Srsy          | EU052291     | 0.000881 | -8.89843 | 2.86459 | 3.2907  | 0.744265 | -0.42611 | -1.34361 |
| Mir434        | NR_029953    | 0.001112 | -8.37473 | 3.09202 | 3.5182  | 0.744227 | -0.42619 | -1.34368 |
| Mfsd7c        | NM_145447    | 0.002045 | -7.13103 | 3.83019 | 4.25671 | 0.744056 | -0.42652 | -1.34398 |
| Bdh1          | NM_175177    | 0.001745 | -7.43815 | 4.52588 | 4.95446 | 0.74299  | -0.42858 | -1.34591 |
| Smad1         | NM_008539    | 0.001076 | -8.447   | 7.08812 | 7.51739 | 0.742638 | -0.42927 | -1.34655 |
| Fbxw2         | NM_013890    | 0.001245 | -8.13061 | 8.01987 | 8.44925 | 0.742581 | -0.42938 | -1.34665 |
| Zfp395        | NM_199029    | 0.005753 | -5.38417 | 6.88019 | 7.31084 | 0.741928 | -0.43065 | -1.34784 |
| Tor1b         | NM_133673    | 0.000647 | -9.64353 | 8.61426 | 9.048   | 0.74034  | -0.43374 | -1.35073 |
| Al317395      | NM_144821    | 0.003405 | -6.21792 | 4.88683 | 5.32142 | 0.739907 | -0.43459 | -1.35152 |
| Npr2          | NM_173788    | 0.005741 | -5.3873  | 7.60461 | 8.0406  | 0.739185 | -0.43599 | -1.35284 |
| Srp54c        | NM_001100110 | 0.006652 | -5.16993 | 9.34431 | 9.78148 | 0.73858  | -0.43717 | -1.35395 |
| 5133401N09Rik | NM_198004    | 0.004186 | -5.87794 | 7.92619 | 8.36341 | 0.73856  | -0.43721 | -1.35399 |
| Rundc2a       | NM_001163498 | 0.002911 | -6.48749 | 5.22264 | 5.66098 | 0.737985 | -0.43834 | -1.35504 |
| Ier5l         | NM_030244    | 0.001508 | -7.73067 | 6.74648 | 7.18721 | 0.736758 | -0.44074 | -1.3573  |
| Daglb         | NM_144915    | 0.000787 | -9.16469 | 6.12621 | 6.56711 | 0.736671 | -0.44091 | -1.35746 |
| Arhgef9       | NM_001033329 | 0.003554 | -6.14639 | 6.51052 | 6.95222 | 0.736267 | -0.4417  | -1.3582  |
| Rfwd2         | NM_011931    | 0.002993 | -6.43918 | 8.06429 | 8.50671 | 0.7359   | -0.44242 | -1.35888 |
| Creb3l1       | NM_011957    | 0.00214  | -7.04495 | 7.2335  | 7.67636 | 0.735674 | -0.44286 | -1.3593  |

|               | ENSMUST0000006435 |          |          |         |         |          |          |          |
|---------------|-------------------|----------|----------|---------|---------|----------|----------|----------|
| 1700036A12Rik | 1                 | 0.003988 | -5.95624 | 5.09359 | 5.53697 | 0.735411 | -0.44338 | -1.35978 |
| Mtx2          | NM_016804         | 0.001418 | -7.85671 | 7.29841 | 7.7432  | 0.734692 | -0.44479 | -1.36112 |
| Cybas3        | NM_201351         | 0.005727 | -5.39089 | 8.16768 | 8.61254 | 0.734657 | -0.44486 | -1.36118 |
| Cpsf3         | NM_018813         | 0.001671 | -7.52353 | 8.02719 | 8.47271 | 0.734319 | -0.44552 | -1.36181 |
| Fundc1        | NM_028058         | 0.003172 | -6.33864 | 8.17117 | 8.61708 | 0.73412  | -0.44591 | -1.36218 |
| Pcca          | NM_144844         | 0.00428  | -5.84205 | 7.24952 | 7.69746 | 0.733088 | -0.44794 | -1.36409 |
| Sypl          | NM_013635         | 0.001895 | -7.27693 | 8.41979 | 8.86871 | 0.732593 | -0.44892 | -1.36501 |
| Trpv2         | NM_011706         | 0.005174 | -5.54475 | 4.66612 | 5.11576 | 0.732225 | -0.44964 | -1.3657  |
| Atp1a2        | NM_178405         | 0.004005 | -5.94948 | 5.26525 | 5.71521 | 0.73206  | -0.44997 | -1.36601 |
| Lmbr1         | NM_020295         | 0.005    | -5.59744 | 7.58327 | 8.03372 | 0.731815 | -0.45045 | -1.36647 |
| Speer4d       | NM_025759         | 0.003762 | -6.05161 | 2.9831  | 3.43363 | 0.731775 | -0.45053 | -1.36654 |
| Arcn1         | NM_145985         | 0.00084  | -9.00952 | 8.60077 | 9.05139 | 0.731729 | -0.45062 | -1.36663 |
| Timm10        | NM_013899         | 0.000248 | -12.3418 | 6.45447 | 6.90564 | 0.731454 | -0.45116 | -1.36714 |
| Snora26       | NR_031758         | 0.006523 | -5.19837 | 6.6794  | 7.13078 | 0.731339 | -0.45139 | -1.36736 |
| Ccdc85a       | NM_181577         | 0.006109 | -5.29482 | 4.29901 | 4.75099 | 0.731038 | -0.45198 | -1.36792 |
|               | ---               | 0.001425 | -7.8466  | 5.06571 | 5.51843 | 0.730666 | -0.45272 | -1.36861 |
| Aldh5a1       | NM_172532         | 0.005034 | -5.58696 | 4.24695 | 4.70004 | 0.730474 | -0.4531  | -1.36897 |
| Sall2         | NM_015772         | 8.65E-05 | -16.124  | 5.42558 | 5.87909 | 0.730262 | -0.45351 | -1.36937 |
| Gne           | NM_015828         | 0.00064  | -9.67082 | 6.98547 | 7.44196 | 0.728756 | -0.45649 | -1.3722  |
| Pogk          | NM_175170         | 0.006842 | -5.12928 | 5.99919 | 6.45719 | 0.727998 | -0.45799 | -1.37363 |
| Syng1         | NM_207708         | 0.0026   | -6.68758 | 6.41276 | 6.87113 | 0.727805 | -0.45838 | -1.37399 |
| Zc3h15        | NM_026934         | 0.00198  | -7.19192 | 8.19777 | 8.65687 | 0.72744  | -0.4591  | -1.37468 |
| Ufc1          | NM_025388         | 0.000761 | -9.24491 | 8.08323 | 8.54234 | 0.727435 | -0.45911 | -1.37469 |
| Ei24          | NM_007915         | 0.002608 | -6.68201 | 7.90807 | 8.36794 | 0.727054 | -0.45987 | -1.37541 |
| Cdnf          | NM_177647         | 0.000455 | -10.5581 | 4.50236 | 4.96291 | 0.726706 | -0.46056 | -1.37607 |
| Evc2          | NM_145920         | 0.002542 | -6.72786 | 6.74787 | 7.20851 | 0.726664 | -0.46064 | -1.37615 |
| Lrrc8a        | NM_177725         | 0.002082 | -7.09723 | 7.56252 | 8.02353 | 0.726479 | -0.46101 | -1.3765  |
| Ap4s1         | NM_021710         | 0.001187 | -8.2322  | 5.26063 | 5.72359 | 0.725495 | -0.46296 | -1.37837 |
| Adam5         | NM_007401         | 0.002763 | -6.57887 | 3.08751 | 3.55114 | 0.725158 | -0.46363 | -1.37901 |
| Ssbp2         | NM_024272         | 0.00416  | -5.88793 | 9.73266 | 10.1969 | 0.724874 | -0.4642  | -1.37955 |

|          |              |          |          |         |         |          |          |          |
|----------|--------------|----------|----------|---------|---------|----------|----------|----------|
| Zfp295   | NM_175428    | 0.005073 | -5.57525 | 6.8419  | 7.30641 | 0.724719 | -0.46451 | -1.37984 |
| Wtip     | NM_207212    | 0.003609 | -6.12041 | 6.91149 | 7.37607 | 0.724684 | -0.46458 | -1.37991 |
| Srp19    | NM_025527    | 0.001783 | -7.3949  | 6.66869 | 7.13355 | 0.724539 | -0.46486 | -1.38019 |
| Nme2     | NM_008705    | 0.005298 | -5.50864 | 9.86994 | 10.3349 | 0.724481 | -0.46498 | -1.3803  |
| Tmed10   | NM_026775    | 0.00298  | -6.44645 | 7.9667  | 8.43187 | 0.724386 | -0.46517 | -1.38048 |
| Rfwd2    | NM_011931    | 0.004099 | -5.91176 | 8.02804 | 8.49321 | 0.724386 | -0.46517 | -1.38048 |
|          | ---          | 0.004645 | -5.71244 | 10.3354 | 10.8017 | 0.723821 | -0.4663  | -1.38156 |
| Thbs1    | NM_011580    | 0.001665 | -7.53055 | 11.7496 | 12.2167 | 0.723408 | -0.46712 | -1.38234 |
| Osbpl7   | NM_001081434 | 0.001799 | -7.37735 | 5.59049 | 6.05833 | 0.723049 | -0.46784 | -1.38303 |
| Rnf207   | NM_001033489 | 0.004725 | -5.68566 | 5.40435 | 5.87243 | 0.722927 | -0.46808 | -1.38326 |
|          | ---          | 0.003125 | -6.36418 | 5.00906 | 5.47739 | 0.722799 | -0.46833 | -1.38351 |
| Dpagt1   | NM_007875    | 0.002151 | -7.03569 | 7.48266 | 7.951   | 0.722793 | -0.46835 | -1.38352 |
| Impact   | NM_008378    | 0.003707 | -6.07601 | 10.7305 | 11.1993 | 0.722553 | -0.46883 | -1.38398 |
| Srp54b   | NM_001100109 | 0.005621 | -5.41895 | 9.34742 | 9.81749 | 0.721931 | -0.47007 | -1.38517 |
| Tmem14c  | NM_025387    | 0.001513 | -7.7234  | 8.02957 | 8.49979 | 0.721854 | -0.47022 | -1.38532 |
| Col16a1  | NM_028266    | 0.006588 | -5.18393 | 7.38718 | 7.85911 | 0.721    | -0.47193 | -1.38696 |
| Fam165b  | NM_138743    | 0.001274 | -8.08052 | 7.59345 | 8.06582 | 0.720775 | -0.47238 | -1.3874  |
| Zfp217   | NM_001033299 | 0.004749 | -5.67774 | 6.4636  | 6.93605 | 0.720739 | -0.47245 | -1.38746 |
|          | ---          | 0.003423 | -6.20907 | 5.53836 | 6.01137 | 0.720464 | -0.473   | -1.38799 |
| Ppp1cc   | NM_013636    | 0.000267 | -12.1067 | 10.4661 | 10.9414 | 0.71931  | -0.47532 | -1.39022 |
| Cep350   | NM_001039184 | 0.003194 | -6.32657 | 6.84349 | 7.31918 | 0.719123 | -0.47569 | -1.39058 |
| Polr3d   | NM_025945    | 0.006185 | -5.27655 | 6.79228 | 7.26968 | 0.71827  | -0.4774  | -1.39223 |
| Wrnip1   | NM_030215    | 0.000347 | -11.3175 | 7.27344 | 7.75153 | 0.717928 | -0.47809 | -1.3929  |
| Psma3    | NM_011184    | 0.002047 | -7.12922 | 8.89357 | 9.37176 | 0.717876 | -0.47819 | -1.393   |
| Cxx1a    | NM_024170    | 0.00097  | -8.67792 | 7.80687 | 8.28586 | 0.717478 | -0.47899 | -1.39377 |
| Srsy     | EU052291     | 0.00045  | -10.587  | 2.63278 | 3.11183 | 0.717453 | -0.47904 | -1.39382 |
| Efhd2    | NM_025994    | 0.002329 | -6.88747 | 7.4681  | 7.94751 | 0.717271 | -0.47941 | -1.39417 |
| Atpif1   | NM_007512    | 0.000135 | -14.4059 | 9.61409 | 10.0942 | 0.716905 | -0.48015 | -1.39488 |
| Slc25a22 | NM_026646    | 0.000161 | -13.7796 | 6.46829 | 6.94862 | 0.716817 | -0.48032 | -1.39506 |
| Herpud2  | NM_020586    | 0.005026 | -5.58961 | 8.77777 | 9.25856 | 0.716583 | -0.48079 | -1.39551 |
| Ndufa11  | NM_027244    | 0.002599 | -6.68829 | 7.88957 | 8.37044 | 0.716546 | -0.48087 | -1.39558 |

|         |              |          |          |         |         |          |          |          |
|---------|--------------|----------|----------|---------|---------|----------|----------|----------|
| Rps23   | NM_024175    | 0.00347  | -6.18609 | 10.2679 | 10.7488 | 0.716518 | -0.48093 | -1.39564 |
| Cdk7    | NM_009874    | 0.006188 | -5.27571 | 8.05259 | 8.53537 | 0.715596 | -0.48278 | -1.39744 |
| Max     | NM_008558    | 4.40E-05 | -19.1263 | 8.09371 | 8.57661 | 0.715534 | -0.48291 | -1.39756 |
| Ppp1cc  | NM_013636    | 0.001258 | -8.10752 | 10.5081 | 10.9912 | 0.715435 | -0.48311 | -1.39775 |
|         | ---          | 0.002538 | -6.73062 | 10.6036 | 11.0878 | 0.714904 | -0.48418 | -1.39879 |
| Alg5    | ---          | 0.001752 | -7.42926 | 2.08815 | 2.57504 | 0.713561 | -0.48689 | -1.40142 |
|         | NM_025442    | 0.001856 | -7.31744 | 7.77466 | 8.26286 | 0.712916 | -0.4882  | -1.40269 |
| Tirap   | ---          | 2.06E-05 | -23.1625 | 8.01568 | 8.50413 | 0.712795 | -0.48844 | -1.40293 |
|         | NM_001177845 | 0.003865 | -6.00757 | 6.44012 | 6.92864 | 0.712757 | -0.48852 | -1.403   |
| Caml    | ---          | 0.001648 | -7.55079 | 10.8376 | 11.3266 | 0.712507 | -0.48902 | -1.40349 |
|         | NM_007596    | 0.001874 | -7.29863 | 6.86452 | 7.35361 | 0.712472 | -0.4891  | -1.40356 |
| Ilvbl   | NM_173751    | 0.000701 | -9.44443 | 7.32897 | 7.8182  | 0.712401 | -0.48924 | -1.4037  |
|         | ---          | 0.006949 | -5.10688 | 3.46492 | 3.95567 | 0.711656 | -0.49075 | -1.40517 |
| Paqr8   | NM_028829    | 0.005386 | -5.48358 | 5.21825 | 5.70906 | 0.711629 | -0.4908  | -1.40523 |
| Bend6   | NM_177235    | 0.000799 | -9.12915 | 3.82866 | 4.31966 | 0.71153  | -0.491   | -1.40542 |
| Syap1   | NM_025932    | 0.003644 | -6.10475 | 7.35423 | 7.8456  | 0.71135  | -0.49137 | -1.40578 |
| Col5a2  | NM_007737    | 0.001146 | -8.30905 | 10.3629 | 10.8571 | 0.709959 | -0.49419 | -1.40853 |
| Srsy    | EU052291     | 0.000537 | -10.1159 | 2.8517  | 3.34654 | 0.709638 | -0.49484 | -1.40917 |
| Anapc16 | NM_025514    | 0.000896 | -8.86127 | 8.68579 | 9.18263 | 0.708658 | -0.49684 | -1.41112 |
| Itm2b   | NM_008410    | 0.002226 | -6.97138 | 11.3329 | 11.8304 | 0.708321 | -0.49752 | -1.41179 |
| Mras    | NM_008624    | 0.005109 | -5.56423 | 5.85581 | 6.35448 | 0.707758 | -0.49867 | -1.41291 |
| Srsy    | EU052291     | 0.001584 | -7.6309  | 2.85446 | 3.35332 | 0.707668 | -0.49886 | -1.41309 |
| Bbs7    | NM_027810    | 0.001267 | -8.09319 | 5.86737 | 6.36762 | 0.706987 | -0.50025 | -1.41445 |
|         | ---          | 0.000971 | -8.67665 | 3.7782  | 4.27867 | 0.706877 | -0.50047 | -1.41467 |
| Khk     | NM_008439    | 0.005491 | -5.45431 | 6.15442 | 6.6553  | 0.706674 | -0.50088 | -1.41508 |
| Tdrd3   | NM_172605    | 0.00175  | -7.43197 | 7.54051 | 8.04186 | 0.706447 | -0.50135 | -1.41553 |
| Rnase10 | NM_029145    | 0.001775 | -7.40451 | 3.26578 | 3.76779 | 0.706121 | -0.50201 | -1.41619 |
|         | ---          | 0.00169  | -7.50067 | 6.68544 | 7.18775 | 0.705975 | -0.50231 | -1.41648 |
|         | ---          | 0.005413 | -5.47605 | 3.0822  | 3.58468 | 0.705895 | -0.50247 | -1.41664 |
| Mrps16  | NM_025440    | 0.003858 | -6.01021 | 7.64613 | 8.14909 | 0.705657 | -0.50296 | -1.41712 |
| Leo1    | NM_001039522 | 0.001155 | -8.29262 | 6.2529  | 6.75651 | 0.705341 | -0.50361 | -1.41775 |

|          |              |          |          |         |         |          |          |          |
|----------|--------------|----------|----------|---------|---------|----------|----------|----------|
| Hprt     | NM_013556    | 0.000844 | -8.99816 | 8.5725  | 9.07796 | 0.704434 | -0.50547 | -1.41958 |
| Dock6    | NM_177030    | 0.0031   | -6.37802 | 6.14354 | 6.65072 | 0.703601 | -0.50717 | -1.42126 |
| Erp44    | NM_029572    | 0.006086 | -5.30019 | 8.61657 | 9.12379 | 0.703576 | -0.50722 | -1.42131 |
| Slc10a3  | NM_145406    | 0.005677 | -5.40395 | 6.80077 | 7.308   | 0.703575 | -0.50722 | -1.42131 |
| Refbp2   | NM_019484    | 0.006898 | -5.11757 | 5.30098 | 5.80838 | 0.70349  | -0.5074  | -1.42148 |
| Psen1    | NM_008943    | 0.002078 | -7.10018 | 8.37204 | 8.88006 | 0.703188 | -0.50802 | -1.4221  |
| Mir411   | NR_029916    | 0.000594 | -9.85879 | 2.61924 | 3.13062 | 0.701548 | -0.51139 | -1.42542 |
| Il17d    | NM_145837    | 0.005752 | -5.38441 | 4.74371 | 5.25655 | 0.700841 | -0.51284 | -1.42686 |
| Anapc13  | NM_181394    | 0.002649 | -6.6543  | 8.43751 | 8.95272 | 0.699691 | -0.51521 | -1.4292  |
| Eno2     | NM_013509    | 0.002438 | -6.80369 | 8.63634 | 9.15187 | 0.699536 | -0.51553 | -1.42952 |
|          | ---          | 0.006478 | -5.20849 | 2.80047 | 3.3164  | 0.699342 | -0.51593 | -1.42992 |
| Vps26b   | NM_178027    | 0.002034 | -7.14086 | 8.06835 | 8.58572 | 0.698644 | -0.51737 | -1.43134 |
| Gm505    | BC158088     | 0.001508 | -7.72995 | 6.40974 | 6.9278  | 0.698308 | -0.51806 | -1.43203 |
| Dexi     | NM_021428    | 0.002244 | -6.9563  | 6.97452 | 7.49307 | 0.698074 | -0.51855 | -1.43251 |
| Btg1     | NM_007569    | 0.005069 | -5.57654 | 10.9964 | 11.5152 | 0.697975 | -0.51875 | -1.43272 |
| Pdxdc1   | NM_053181    | 0.001582 | -7.63291 | 8.46884 | 8.98973 | 0.696945 | -0.52088 | -1.43483 |
| lqsec2   | NM_001005475 | 0.004377 | -5.80658 | 5.44776 | 5.96878 | 0.696876 | -0.52103 | -1.43498 |
| Tmem185b | NM_146103    | 0.000382 | -11.0479 | 6.38469 | 6.906   | 0.696735 | -0.52132 | -1.43527 |
|          | ---          | 0.002299 | -6.91143 | 5.10412 | 5.62555 | 0.696683 | -0.52143 | -1.43537 |
| Gan      | NM_001081151 | 0.000452 | -10.5789 | 6.06346 | 6.58504 | 0.696608 | -0.52158 | -1.43553 |
| Clip3    | NM_001081114 | 0.000719 | -9.3815  | 7.94472 | 8.46665 | 0.696443 | -0.52192 | -1.43587 |
| Pnpla7   | NM_146251    | 0.001801 | -7.3753  | 6.49777 | 7.02306 | 0.69482  | -0.52529 | -1.43922 |
| Al597468 | NM_001013028 | 0.004353 | -5.81503 | 7.70041 | 8.22601 | 0.69467  | -0.5256  | -1.43953 |
| Mtap4    | NM_008633    | 0.001461 | -7.79472 | 7.90794 | 8.43381 | 0.694537 | -0.52588 | -1.43981 |
|          | ---          | 0.002233 | -6.96538 | 6.48313 | 7.00943 | 0.694334 | -0.5263  | -1.44023 |
| Cxx1a    | NM_024170    | 0.00107  | -8.46016 | 7.80467 | 8.33138 | 0.694134 | -0.52671 | -1.44064 |
| Fam110b  | BC055683     | 0.002889 | -6.50089 | 5.86093 | 6.38823 | 0.693851 | -0.5273  | -1.44123 |
|          | ---          | 0.003137 | -6.35758 | 9.61278 | 10.1401 | 0.693839 | -0.52733 | -1.44126 |
| Spin1    | NM_146043    | 0.000421 | -10.776  | 8.62168 | 9.14929 | 0.693704 | -0.52761 | -1.44154 |
| Kctd5    | NM_027008    | 0.005661 | -5.40817 | 8.31306 | 8.84285 | 0.692655 | -0.52979 | -1.44372 |
| Casd1    | NM_145398    | 0.003362 | -6.23935 | 8.09227 | 8.62219 | 0.692593 | -0.52992 | -1.44385 |



|          |                        |          |          |         |         |          |          |          |
|----------|------------------------|----------|----------|---------|---------|----------|----------|----------|
|          | ---                    | 0.002122 | -7.06059 | 4.39064 | 4.92069 | 0.692531 | -0.53005 | -1.44398 |
| Gm4983   | XR_106691              | 0.001861 | -7.31212 | 5.94668 | 6.47831 | 0.691775 | -0.53163 | -1.44556 |
| Gm4983   | XR_106691              | 0.001861 | -7.31212 | 5.94668 | 6.47831 | 0.691775 | -0.53163 | -1.44556 |
| Gopc     | NM_053187              | 0.000124 | -14.7241 | 7.62722 | 8.15897 | 0.691715 | -0.53175 | -1.44568 |
|          | ---                    | 0.000107 | -15.2699 | 9.913   | 10.4466 | 0.69082  | -0.53362 | -1.44756 |
| Twist2   | NM_007855              | 0.000684 | -9.50601 | 8.4669  | 9.00088 | 0.690648 | -0.53398 | -1.44792 |
|          | ---                    | 0.004137 | -5.89677 | 6.80496 | 7.3393  | 0.690475 | -0.53434 | -1.44828 |
|          | ---                    | 0.001887 | -7.28505 | 8.8533  | 9.3884  | 0.690115 | -0.53509 | -1.44903 |
| Tnnt3    | NM_001163664           | 0.004606 | -5.72547 | 6.05324 | 6.58922 | 0.68969  | -0.53598 | -1.44993 |
| Chst2    | NM_018763              | 0.004367 | -5.80996 | 7.19732 | 7.73383 | 0.689437 | -0.53651 | -1.45046 |
| Adamtsl1 | NM_029967              | 0.003339 | -6.25101 | 4.36894 | 4.90556 | 0.689384 | -0.53662 | -1.45057 |
| Shroom1  | NM_027917              | 0.001373 | -7.92409 | 4.88692 | 5.42362 | 0.689344 | -0.5367  | -1.45065 |
| Zcchc18  | NM_001035510           | 0.000313 | -11.6245 | 4.32982 | 4.86736 | 0.688946 | -0.53754 | -1.45149 |
| Rplp1    | NM_018853              | 0.001407 | -7.87217 | 11.3865 | 11.9242 | 0.688912 | -0.53761 | -1.45156 |
| Jak1     | NM_146145              | 0.001916 | -7.25511 | 9.79044 | 10.3281 | 0.688891 | -0.53765 | -1.45161 |
| Ppif     | NM_134084              | 0.002756 | -6.58338 | 6.19025 | 6.72853 | 0.688588 | -0.53829 | -1.45225 |
| Trmt61b  | NR_015549              | 0.001243 | -8.13403 | 3.81565 | 4.35557 | 0.687807 | -0.53993 | -1.4539  |
| Olf1314  | NM_146450              | 0.001023 | -8.55886 | 3.00806 | 3.54889 | 0.687377 | -0.54083 | -1.45481 |
| Smyd2    | NM_026796              | 0.005142 | -5.55449 | 7.34974 | 7.89128 | 0.687033 | -0.54155 | -1.45553 |
| Tmem35   | NM_026239              | 0.003255 | -6.29429 | 4.10807 | 4.65121 | 0.686272 | -0.54315 | -1.45715 |
| Gm5533   | ENSMUST0000007098<br>7 | 0.003909 | -5.98874 | 3.2208  | 3.76446 | 0.686029 | -0.54366 | -1.45766 |
| Cpped1   | NM_146067              | 0.00069  | -9.48224 | 6.94409 | 7.48779 | 0.68601  | -0.5437  | -1.4577  |
| Dlg2     | NM_011807              | 0.0006   | -9.83174 | 4.16799 | 4.71364 | 0.685086 | -0.54564 | -1.45967 |
| Mettl11a | NM_170592              | 0.004385 | -5.80352 | 7.97779 | 8.52424 | 0.684702 | -0.54645 | -1.46049 |
| Ipo4     | NM_024267              | 0.002816 | -6.54574 | 8.91738 | 9.46446 | 0.684404 | -0.54708 | -1.46112 |
|          | ---                    | 0.001302 | -8.03446 | 3.95548 | 4.50258 | 0.684394 | -0.5471  | -1.46115 |
| Lamp2    | NM_001017959           | 0.004844 | -5.64684 | 10.8235 | 11.3717 | 0.683858 | -0.54823 | -1.46229 |
| Chpt1    | NM_144807              | 0.005283 | -5.51306 | 7.71337 | 8.26218 | 0.683585 | -0.54881 | -1.46288 |
|          | ---                    | 0.006338 | -5.24048 | 3.84653 | 4.39569 | 0.683418 | -0.54916 | -1.46323 |
| Mgat2    | NM_146035              | 0.002773 | -6.57271 | 7.886   | 8.43518 | 0.683411 | -0.54918 | -1.46325 |

|               |              |          |          |         |         |          |          |          |
|---------------|--------------|----------|----------|---------|---------|----------|----------|----------|
| Tusc3         | BC069898     | 0.001943 | -7.22898 | 4.56849 | 5.1177  | 0.683392 | -0.54921 | -1.46329 |
| Selk          | NM_019979    | 0.003599 | -6.12542 | 2.82507 | 3.37507 | 0.683021 | -0.55    | -1.46408 |
| Gm6484        | NM_001080940 | 0.000419 | -10.7869 | 5.44689 | 5.99777 | 0.682601 | -0.55089 | -1.46498 |
| Sytl5         | NM_177704    | 0.004508 | -5.75951 | 3.45212 | 4.00363 | 0.682305 | -0.55151 | -1.46562 |
| Asph          | NM_023066    | 0.004297 | -5.83588 | 7.35489 | 7.90653 | 0.682244 | -0.55164 | -1.46575 |
| Ddi2          | NM_001017966 | 0.001604 | -7.60504 | 7.64092 | 8.19264 | 0.682205 | -0.55172 | -1.46583 |
| Tfdp1         | NM_009361    | 0.004671 | -5.7036  | 8.40291 | 8.95574 | 0.681681 | -0.55283 | -1.46696 |
|               | ---          | 0.004025 | -5.94117 | 8.93968 | 9.4928  | 0.681542 | -0.55313 | -1.46726 |
| Ern1          | NM_023913    | 0.006303 | -5.24861 | 6.95886 | 7.51429 | 0.680452 | -0.55544 | -1.46961 |
| Depdc6        | NM_001037937 | 0.000894 | -8.86556 | 7.76474 | 8.32035 | 0.68037  | -0.55561 | -1.46979 |
|               | ---          | 0.00389  | -5.9968  | 7.35047 | 7.90621 | 0.680307 | -0.55574 | -1.46993 |
| 2010107E04Rik | NM_027360    | 0.005992 | -5.32325 | 9.47732 | 10.0331 | 0.680297 | -0.55576 | -1.46995 |
| Mapk6         | NM_015806    | 0.001606 | -7.60276 | 8.32019 | 8.87623 | 0.680167 | -0.55604 | -1.47023 |
| Manf          | NM_029103    | 0.004021 | -5.94281 | 8.27863 | 8.8347  | 0.680148 | -0.55608 | -1.47027 |
| Npl           | NM_028749    | 0.001652 | -7.54584 | 3.92794 | 4.48404 | 0.68014  | -0.5561  | -1.47029 |
| Sidt2         | NM_172257    | 0.002069 | -7.10895 | 8.55412 | 9.11102 | 0.67976  | -0.5569  | -1.47111 |
| F830001A07Rik | AK089550     | 0.00422  | -5.86478 | 4.62193 | 5.17887 | 0.67974  | -0.55695 | -1.47115 |
| Apol6         | NM_028010    | 0.004312 | -5.83044 | 4.54911 | 5.10779 | 0.678921 | -0.55869 | -1.47293 |
| Pigh          | NM_029988    | 0.000255 | -12.251  | 5.33764 | 5.89633 | 0.678916 | -0.5587  | -1.47294 |
| Morf4l2       | NM_019768    | 0.006256 | -5.25976 | 9.80676 | 10.3667 | 0.678322 | -0.55996 | -1.47423 |
| H2-K1         | NM_001001892 | 0.006439 | -5.21739 | 8.32977 | 8.89089 | 0.677775 | -0.56112 | -1.47542 |
| Cebpb         | NM_009883    | 0.001976 | -7.1963  | 8.19123 | 8.75287 | 0.677531 | -0.56164 | -1.47595 |
| Cep120        | NM_178686    | 0.000888 | -8.88215 | 7.15015 | 7.71204 | 0.677415 | -0.56189 | -1.4762  |
|               | ---          | 0.000344 | -11.3444 | 3.18156 | 3.74408 | 0.677121 | -0.56252 | -1.47684 |
| Atp5sl        | NM_025504    | 0.000961 | -8.69929 | 6.15496 | 6.71796 | 0.676892 | -0.563   | -1.47734 |
| Speer8-ps1    | NR_001584    | 0.006081 | -5.30146 | 4.623   | 5.18788 | 0.676009 | -0.56489 | -1.47927 |
| Srsy          | EU052291     | 0.003504 | -6.17008 | 2.81014 | 3.37504 | 0.676002 | -0.5649  | -1.47929 |
| Uimc1         | NM_011307    | 8.82E-05 | -16.0463 | 6.7131  | 7.27854 | 0.675751 | -0.56544 | -1.47984 |
| Cltb          | NM_028870    | 0.000434 | -10.6921 | 7.74067 | 8.30622 | 0.6757   | -0.56555 | -1.47995 |
| Akap13        | NM_029332    | 0.002145 | -7.04037 | 7.93311 | 8.49943 | 0.675337 | -0.56632 | -1.48074 |
| Sh3pxd2b      | NM_177364    | 0.001397 | -7.88841 | 8.36282 | 8.92958 | 0.675131 | -0.56676 | -1.4812  |

|               |                        |          |          |         |         |          |          |          |
|---------------|------------------------|----------|----------|---------|---------|----------|----------|----------|
| Slc9a6        | NM_172780              | 0.000203 | -12.9788 | 8.06721 | 8.63404 | 0.675097 | -0.56683 | -1.48127 |
| Hoxb5         | NM_008268              | 0.001762 | -7.41861 | 5.21261 | 5.77986 | 0.674901 | -0.56725 | -1.4817  |
| Arhgap1       | NR_027373              | 0.001619 | -7.58647 | 7.65768 | 8.22566 | 0.674558 | -0.56799 | -1.48245 |
| Clptm1l       | NM_146047              | 0.000922 | -8.79417 | 9.4355  | 10.0035 | 0.674536 | -0.56803 | -1.4825  |
| Appl1         | NM_145221              | 0.002805 | -6.55269 | 7.652   | 8.22004 | 0.674534 | -0.56804 | -1.48251 |
| Sh3bgrl       | NM_019989              | 0.001245 | -8.12965 | 10.1464 | 10.7147 | 0.674426 | -0.56827 | -1.48274 |
| Vps8          | NM_001081366           | 0.000611 | -9.78471 | 7.40116 | 7.97143 | 0.673493 | -0.57027 | -1.4848  |
| Ier3ip1       | NM_025409              | 1.49E-05 | -25.1158 | 7.82647 | 8.39733 | 0.673213 | -0.57087 | -1.48541 |
|               | ---                    | 0.001405 | -7.87581 | 4.55185 | 5.12422 | 0.672513 | -0.57237 | -1.48696 |
| Zdhhc1        | NM_175160              | 0.002172 | -7.01702 | 6.96562 | 7.53815 | 0.67244  | -0.57252 | -1.48712 |
| Bach1         | NM_007520              | 0.002956 | -6.46041 | 7.96825 | 8.54233 | 0.671713 | -0.57408 | -1.48873 |
| Fermt2        | NM_146054              | 0.006463 | -5.212   | 8.76951 | 9.34571 | 0.67073  | -0.5762  | -1.49091 |
| Trappc4       | NM_021789              | 0.001749 | -7.43292 | 7.8364  | 8.41275 | 0.670661 | -0.57634 | -1.49107 |
| Fam115a       | BC031718               | 0.004228 | -5.86177 | 8.51282 | 9.09206 | 0.669315 | -0.57924 | -1.49406 |
| Laptm4a       | NM_008640              | 0.001227 | -8.16192 | 11.3445 | 11.924  | 0.669175 | -0.57955 | -1.49438 |
| Cul7          | NM_025611              | 0.000172 | -13.5366 | 7.3356  | 7.91515 | 0.669173 | -0.57955 | -1.49438 |
| Hlf           | NM_172563              | 0.003572 | -6.13787 | 4.64076 | 5.22191 | 0.668435 | -0.58114 | -1.49603 |
| Ninl          | NM_207204              | 0.002896 | -6.49662 | 6.11325 | 6.69488 | 0.668208 | -0.58163 | -1.49654 |
| Il1r2         | NM_010555              | 0.005234 | -5.52726 | 3.88938 | 4.47212 | 0.667692 | -0.58274 | -1.4977  |
| Mmgt1         | NM_146234              | 0.002864 | -6.51614 | 7.47043 | 8.05479 | 0.666945 | -0.58436 | -1.49937 |
| Cnih          | NM_009919              | 0.003276 | -6.28375 | 9.102   | 9.68717 | 0.666572 | -0.58517 | -1.50021 |
| LOC100041704  | ENSMUST0000010601<br>0 | 0.003028 | -6.41894 | 2.81812 | 3.40338 | 0.666529 | -0.58526 | -1.50031 |
| 5430411K18Rik | NM_001195633           | 0.00181  | -7.36571 | 6.60504 | 7.1909  | 0.666252 | -0.58586 | -1.50093 |
| St8sia2       | NM_009181              | 0.001381 | -7.9123  | 4.46971 | 5.05592 | 0.666091 | -0.58621 | -1.5013  |
| Mical2        | NM_001193305           | 0.001014 | -8.57861 | 7.6569  | 8.24406 | 0.665649 | -0.58717 | -1.50229 |
|               | ---                    | 0.004552 | -5.74441 | 3.99989 | 4.58766 | 0.665372 | -0.58777 | -1.50292 |
| Slc31a2       | NM_025286              | 0.004768 | -5.67132 | 7.51704 | 8.1071  | 0.664319 | -0.59005 | -1.5053  |
|               | ---                    | 0.000546 | -10.0737 | 9.00953 | 9.60043 | 0.66393  | -0.5909  | -1.50618 |
| Rnd3          | NM_028810              | 0.000178 | -13.4264 | 9.36758 | 9.95857 | 0.663888 | -0.59099 | -1.50628 |
| Txndc11       | NM_029582              | 0.001557 | -7.66584 | 7.26833 | 7.86023 | 0.663467 | -0.5919  | -1.50723 |

|               |                                   |          |          |         |         |          |          |          |
|---------------|-----------------------------------|----------|----------|---------|---------|----------|----------|----------|
| Gm98          | NM_001033481                      | 0.000516 | -10.2224 | 4.9982  | 5.59111 | 0.663003 | -0.59291 | -1.50829 |
| Sgce          | NM_001130190                      | 0.000813 | -9.08809 | 8.79221 | 9.38556 | 0.662804 | -0.59335 | -1.50874 |
| Wdr82         | NM_029896                         | 0.000208 | -12.8987 | 9.19992 | 9.79496 | 0.662028 | -0.59504 | -1.51051 |
| Grin2d        | NM_008172                         | 0.000529 | -10.1598 | 4.97279 | 5.56932 | 0.661345 | -0.59653 | -1.51207 |
| Atad2b        | NM_001099628                      | 4.77E-05 | -18.7487 | 6.41481 | 7.01255 | 0.660789 | -0.59774 | -1.51334 |
| Znf512b       | NM_001164597                      | 0.002438 | -6.80376 | 5.88423 | 6.48502 | 0.659396 | -0.60078 | -1.51654 |
| Pdzrn3        | NM_018884                         | 0.00389  | -5.99701 | 8.80398 | 9.40492 | 0.659324 | -0.60094 | -1.5167  |
|               | ---                               | 5.92E-05 | -17.7522 | 9.0743  | 9.67528 | 0.65931  | -0.60097 | -1.51674 |
| Xpr1          | NM_011273<br>ENSMUST0000011307    | 0.001962 | -7.21001 | 7.50541 | 8.10676 | 0.659134 | -0.60136 | -1.51714 |
| Mcart6        | 0                                 | 0.001217 | -8.17932 | 5.40677 | 6.00844 | 0.658994 | -0.60166 | -1.51746 |
| Phf2          | NM_011078                         | 1.08E-05 | -27.2624 | 6.56646 | 7.16814 | 0.658983 | -0.60169 | -1.51749 |
| Zfp820        | NM_029281                         | 0.00681  | -5.13612 | 4.14134 | 4.74313 | 0.658935 | -0.60179 | -1.5176  |
| Nrbf2         | NM_001036293                      | 0.005476 | -5.45851 | 6.90123 | 7.50303 | 0.658931 | -0.6018  | -1.51761 |
|               | ---                               | 0.001733 | -7.45095 | 9.4631  | 10.0652 | 0.658786 | -0.60212 | -1.51794 |
| Tm2d1         | NM_053157                         | 0.003287 | -6.27795 | 7.84262 | 8.44563 | 0.658382 | -0.603   | -1.51888 |
| Psmg1         | NM_019537                         | 0.001828 | -7.34655 | 7.74247 | 8.34761 | 0.657407 | -0.60514 | -1.52113 |
| A030009H04Rik | NR_027827                         | 0.000163 | -13.7256 | 4.91892 | 5.52496 | 0.656999 | -0.60604 | -1.52207 |
| Mobkl2a       | NM_172457                         | 0.001085 | -8.42961 | 7.45432 | 8.06137 | 0.656538 | -0.60705 | -1.52314 |
| 0610007P08Rik | NM_001013608<br>ENSMUST0000011140 | 0.005369 | -5.48827 | 6.363   | 6.97124 | 0.655995 | -0.60824 | -1.5244  |
| LOC100039552  | 7                                 | 0.004918 | -5.62315 | 2.94709 | 3.55656 | 0.655437 | -0.60947 | -1.5257  |
| Atf1          | NM_007497                         | 0.003528 | -6.15835 | 7.54292 | 8.1524  | 0.655432 | -0.60948 | -1.52571 |
| Srsy          | EU052291<br>ENSMUST0000005584     | 0.001017 | -8.57246 | 2.84539 | 3.45497 | 0.655388 | -0.60958 | -1.52581 |
| Armcx4        | 2                                 | 0.001768 | -7.41225 | 5.23926 | 5.84934 | 0.655157 | -0.61009 | -1.52635 |
| Eif4ebp2      | NM_010124                         | 0.001819 | -7.3567  | 6.47403 | 7.08446 | 0.655    | -0.61043 | -1.52672 |
| Mir412        | NR_029917                         | 0.005149 | -5.55242 | 4.0293  | 4.6404  | 0.654697 | -0.6111  | -1.52742 |
| Pex11b        | NM_011069                         | 0.004214 | -5.86726 | 6.8445  | 7.45611 | 0.654463 | -0.61162 | -1.52797 |
| Srsy          | XR_106493                         | 0.000197 | -13.0909 | 2.82929 | 3.44265 | 0.653673 | -0.61336 | -1.52982 |
| Col11a1       | NM_007729                         | 0.007088 | -5.07849 | 5.49492 | 6.10896 | 0.653364 | -0.61404 | -1.53054 |
| Sh3bp5        | NM_011894                         | 0.003644 | -6.10449 | 6.99156 | 7.60582 | 0.653267 | -0.61426 | -1.53077 |
| LOC100043371  | ENSMUST0000010156                 | 0.000187 | -13.2588 | 6.03669 | 6.65159 | 0.652973 | -0.61491 | -1.53146 |

8

|              |                   |          |          |         |         |          |          |          |
|--------------|-------------------|----------|----------|---------|---------|----------|----------|----------|
| E2f6         | NM_033270         | 0.001543 | -7.68394 | 6.49147 | 7.10646 | 0.652935 | -0.61499 | -1.53155 |
| Sytl5        | NM_177704         | 0.004568 | -5.73878 | 3.95745 | 4.57293 | 0.652711 | -0.61548 | -1.53207 |
| Tbce         | NM_178337         | 0.000655 | -9.61327 | 7.28921 | 7.90531 | 0.652432 | -0.6161  | -1.53273 |
|              | ---               | 0.001313 | -8.01817 | 3.76833 | 4.38695 | 0.651296 | -0.61862 | -1.5354  |
|              | ENSMUST0000010601 |          |          |         |         |          |          |          |
| LOC100041704 | 0                 | 0.006377 | -5.23159 | 3.228   | 3.84663 | 0.65129  | -0.61863 | -1.53541 |
| Zfp14        | NM_011748         | 0.006805 | -5.13718 | 5.91023 | 6.53067 | 0.650472 | -0.62044 | -1.53735 |
| Cmtm3        | NM_024217         | 0.000321 | -11.5506 | 9.71378 | 10.3355 | 0.64989  | -0.62173 | -1.53872 |
| G6pc3        | NM_175935         | 0.002045 | -7.1309  | 7.92672 | 8.54866 | 0.649796 | -0.62194 | -1.53894 |
| Tead1        | NM_001166584      | 0.003941 | -5.97577 | 8.83709 | 9.45988 | 0.649411 | -0.6228  | -1.53986 |
| Mir668       | NR_030424         | 0.00137  | -7.92877 | 5.18099 | 5.80383 | 0.649394 | -0.62283 | -1.5399  |
| Mmadhc       | NM_133839         | 0.000918 | -8.80434 | 7.90713 | 8.53064 | 0.649091 | -0.62351 | -1.54062 |
| Slc17a5      | NM_172773         | 0.000627 | -9.71972 | 8.16638 | 8.78996 | 0.649057 | -0.62358 | -1.5407  |
| Tmed10       | NM_026775         | 1.67E-05 | -24.4282 | 9.5449  | 10.1702 | 0.648283 | -0.6253  | -1.54254 |
| Gm5s         | NM_146041         | 0.003828 | -6.02306 | 7.08499 | 7.71101 | 0.647958 | -0.62603 | -1.54331 |
|              | ---               | 0.003928 | -5.98089 | 10.2234 | 10.8494 | 0.647955 | -0.62603 | -1.54332 |
| Mir494       | NR_030269         | 0.003529 | -6.15815 | 4.21812 | 4.84421 | 0.647928 | -0.6261  | -1.54338 |
| Agtppb1      | NM_023328         | 0.001047 | -8.50737 | 6.66075 | 7.28717 | 0.647783 | -0.62642 | -1.54373 |
| Mir99a       | NR_029535         | 0.005466 | -5.46109 | 4.24424 | 4.87094 | 0.647659 | -0.62669 | -1.54402 |
| Ddit4        | NM_029083         | 0.00078  | -9.1845  | 8.18266 | 8.8096  | 0.647547 | -0.62694 | -1.54429 |
| Acat1        | NM_144784         | 0.000412 | -10.8314 | 8.35623 | 8.98355 | 0.647376 | -0.62733 | -1.5447  |
| Irak1        | NM_001177973      | 0.000142 | -14.2233 | 7.09427 | 7.72248 | 0.646977 | -0.62821 | -1.54565 |
| Rassf1       | NM_019713         | 0.002407 | -6.82687 | 7.06489 | 7.69391 | 0.646617 | -0.62902 | -1.54651 |
| Evi2a        | NM_001033711      | 0.005103 | -5.56618 | 4.46122 | 5.09109 | 0.646232 | -0.62988 | -1.54743 |
| Gm13777      | XM_915186         | 0.000152 | -13.9686 | 6.19705 | 6.82975 | 0.64497  | -0.6327  | -1.55046 |
| Mir539       | NR_030262         | 0.001457 | -7.80062 | 2.62922 | 3.26237 | 0.644766 | -0.63315 | -1.55095 |
|              | ---               | 0.003848 | -6.01467 | 5.65728 | 6.29118 | 0.644435 | -0.63389 | -1.55175 |
| Aldh3a2      | NM_007437         | 0.004997 | -5.59847 | 9.0916  | 9.72716 | 0.643688 | -0.63557 | -1.55355 |
| Gm1973       | NM_029288         | 0.002189 | -7.00287 | 2.68356 | 3.31947 | 0.643534 | -0.63591 | -1.55392 |
| Eif1a        | NM_010120         | 0.001022 | -8.56122 | 7.87946 | 8.51645 | 0.643054 | -0.63699 | -1.55508 |

|               |                   |          |          |         |         |          |          |          |
|---------------|-------------------|----------|----------|---------|---------|----------|----------|----------|
| Trp53bp2      | NM_173378         | 0.00018  | -13.396  | 7.11091 | 7.7496  | 0.642298 | -0.63869 | -1.55691 |
|               | ---               | 0.001221 | -8.171   | 6.60564 | 7.24634 | 0.641403 | -0.6407  | -1.55908 |
| Cr1l          | NM_013499         | 0.002322 | -6.89306 | 6.75915 | 7.40031 | 0.641195 | -0.64117 | -1.55959 |
| Arf4          | NM_007479         | 0.003108 | -6.37372 | 10.6059 | 11.2472 | 0.641134 | -0.6413  | -1.55974 |
| Tmed9         | NM_026211         | 0.006454 | -5.21396 | 7.83156 | 8.47577 | 0.63984  | -0.64422 | -1.56289 |
| Cpxm2         | NM_018867         | 0.0067   | -5.15959 | 4.3157  | 4.96043 | 0.639608 | -0.64474 | -1.56346 |
| Atg2b         | NM_029654         | 0.004243 | -5.85619 | 6.9343  | 7.57935 | 0.639475 | -0.64504 | -1.56378 |
| Twf2          | NM_011876         | 0.006494 | -5.20499 | 6.31385 | 6.95962 | 0.639152 | -0.64577 | -1.56457 |
| 9430020K01Rik | NM_001081963      | 0.002387 | -6.84226 | 7.43188 | 8.07879 | 0.638647 | -0.64691 | -1.56581 |
| Hivep1        | NM_007772         | 0.001543 | -7.68367 | 7.13452 | 7.783   | 0.637954 | -0.64848 | -1.56751 |
| Siva1         | NM_013929         | 0.006963 | -5.10398 | 6.77895 | 7.42889 | 0.637309 | -0.64994 | -1.5691  |
| Zbtb34        | NM_001085507      | 0.005878 | -5.35206 | 5.85951 | 6.50985 | 0.63713  | -0.65034 | -1.56954 |
|               | ---               | 0.002451 | -6.7944  | 7.38792 | 8.03904 | 0.636782 | -0.65113 | -1.5704  |
| Sec61b        | NM_024171         | 0.001151 | -8.30023 | 7.38481 | 8.03613 | 0.636695 | -0.65133 | -1.57061 |
| Zc3h13        | NM_026083         | 0.000174 | -13.5031 | 7.34632 | 7.99795 | 0.636558 | -0.65164 | -1.57095 |
|               | ---               | 0.001833 | -7.34106 | 3.77751 | 4.42957 | 0.636371 | -0.65206 | -1.57141 |
| Ust           | BC138155          | 0.000784 | -9.175   | 3.36498 | 4.01862 | 0.635675 | -0.65364 | -1.57313 |
|               | ENSMUST0000011594 |          |          |         |         |          |          |          |
| LOC665406     | 3                 | 0.001546 | -7.68023 | 2.84028 | 3.49405 | 0.635617 | -0.65377 | -1.57327 |
| H13           | NM_001159551      | 0.003042 | -6.41084 | 8.86476 | 9.52004 | 0.634954 | -0.65528 | -1.57492 |
| Nrbf2         | NM_001036293      | 0.004578 | -5.73534 | 6.84759 | 7.50353 | 0.63466  | -0.65594 | -1.57565 |
| Nrbf2         | NM_001036293      | 0.004578 | -5.73534 | 6.84759 | 7.50353 | 0.63466  | -0.65594 | -1.57565 |
| Nvl           | NM_026171         | 0.000522 | -10.1915 | 7.64353 | 8.30032 | 0.634285 | -0.6568  | -1.57658 |
| Brp44         | NM_027430         | 2.10E-05 | -23.0346 | 6.88706 | 7.54392 | 0.634259 | -0.65686 | -1.57664 |
| Abl1          | NM_001112703      | 0.001099 | -8.40038 | 7.72107 | 8.37907 | 0.633756 | -0.658   | -1.57789 |
| Thnsl2        | NM_178413         | 0.002107 | -7.07415 | 4.67638 | 5.33455 | 0.633683 | -0.65817 | -1.57808 |
| Elac1         | NM_053255         | 0.005356 | -5.49212 | 6.28242 | 6.9412  | 0.633411 | -0.65879 | -1.57875 |
| Kiss1r        | NM_053244         | 0.00419  | -5.87633 | 5.17558 | 5.83682 | 0.632333 | -0.66125 | -1.58145 |
| Epm2a         | NM_010146         | 0.002553 | -6.72013 | 4.34451 | 5.0067  | 0.631921 | -0.66219 | -1.58248 |
| Mia3          | NM_177389         | 0.003387 | -6.22691 | 7.50773 | 8.17008 | 0.631847 | -0.66235 | -1.58266 |
| Fastkd2       | NM_172422         | 0.005852 | -5.35866 | 6.55429 | 7.21685 | 0.631756 | -0.66256 | -1.58289 |

|               |                   |          |          |         |         |          |          |          |
|---------------|-------------------|----------|----------|---------|---------|----------|----------|----------|
| Sdcbp         | NM_001098227      | 0.002557 | -6.71731 | 9.94604 | 10.6112 | 0.630634 | -0.66513 | -1.58571 |
| Itpkb         | NM_001081175      | 0.001108 | -8.38247 | 6.65194 | 7.31753 | 0.630433 | -0.66558 | -1.58621 |
| Tsr2          | NM_001164578      | 0.001036 | -8.53039 | 7.30866 | 7.97446 | 0.630339 | -0.6658  | -1.58645 |
| Cep350        | NM_001039184      | 0.003117 | -6.36868 | 6.27108 | 6.93708 | 0.630253 | -0.666   | -1.58666 |
| Ap3b1         | NM_009680         | 0.000257 | -12.224  | 8.48893 | 9.15496 | 0.630238 | -0.66603 | -1.5867  |
| Auh           | NM_016709         | 0.003286 | -6.27837 | 7.75915 | 8.42589 | 0.62993  | -0.66674 | -1.58748 |
| Gng12         | NM_001177560      | 0.005272 | -5.51608 | 9.91958 | 10.5872 | 0.62955  | -0.66761 | -1.58843 |
| Tprkb         | NM_001170488      | 0.006946 | -5.10751 | 7.72867 | 8.39656 | 0.629426 | -0.66789 | -1.58875 |
| 2200002K05Rik | BC055786          | 0.002467 | -6.7827  | 4.02873 | 4.6972  | 0.629174 | -0.66847 | -1.58938 |
| Abhd4         | NM_134076         | 0.006719 | -5.15551 | 8.51631 | 9.18532 | 0.628939 | -0.66901 | -1.58998 |
|               | ---               | 0.005078 | -5.57358 | 2.80861 | 3.47852 | 0.628547 | -0.66991 | -1.59097 |
| Mrpl52        | NM_026851         | 9.71E-05 | -15.6604 | 7.67031 | 8.3409  | 0.628247 | -0.6706  | -1.59173 |
|               | ENSMUST0000008128 |          |          |         |         |          |          |          |
| Syngap1       | 5                 | 0.003332 | -6.25479 | 6.7611  | 7.43183 | 0.62819  | -0.67073 | -1.59188 |
|               | ---               | 0.002531 | -6.73631 | 9.16808 | 9.83909 | 0.628067 | -0.67101 | -1.59219 |
| Sox12         | NM_011438         | 0.000565 | -9.98548 | 4.77604 | 5.44751 | 0.627868 | -0.67147 | -1.59269 |
| Aldh2         | NM_009656         | 0.002466 | -6.78315 | 9.19493 | 9.86693 | 0.627637 | -0.672   | -1.59328 |
| Mblac1        | NM_177878         | 0.004245 | -5.85529 | 5.22783 | 5.90194 | 0.62672  | -0.67411 | -1.59561 |
| Dusp12        | NM_023173         | 0.000571 | -9.95925 | 5.86957 | 6.54602 | 0.625707 | -0.67644 | -1.59819 |
| Tsnax         | NM_016909         | 0.004768 | -5.67139 | 7.48039 | 8.15716 | 0.625564 | -0.67677 | -1.59856 |
| C230055K05Rik | NM_001039231      | 0.00699  | -5.0985  | 4.47327 | 5.15059 | 0.625327 | -0.67732 | -1.59916 |
| Ptp4a1        | NM_011200         | 0.000505 | -10.2784 | 9.47843 | 10.1565 | 0.624985 | -0.67811 | -1.60004 |
| Mfap5         | NM_015776         | 0.005757 | -5.38301 | 8.27839 | 8.95691 | 0.624806 | -0.67852 | -1.6005  |
| B930041F14Rik | NM_178699         | 0.003524 | -6.16026 | 5.31736 | 5.99665 | 0.624471 | -0.67929 | -1.60136 |
| Elovl5        | NM_134255         | 1.53E-05 | -24.9581 | 9.31685 | 9.99653 | 0.624301 | -0.67969 | -1.60179 |
| Srsy          | XR_106493         | 0.0027   | -6.61991 | 3.1583  | 3.8397  | 0.623563 | -0.68139 | -1.60369 |
| Stt3a         | NM_008408         | 0.001529 | -7.70278 | 10.8212 | 11.5051 | 0.622442 | -0.68399 | -1.60658 |
|               | ENSMUST0000010153 |          |          |         |         |          |          |          |
| 9030624G23Rik | 8                 | 4.87E-05 | -18.6455 | 5.97019 | 6.65467 | 0.622231 | -0.68448 | -1.60712 |
| Maged1        | NM_019791         | 0.003775 | -6.04616 | 9.34024 | 10.0254 | 0.621951 | -0.68513 | -1.60784 |
| Gm5458        | NM_001024706      | 0.000136 | -14.3897 | 4.11824 | 4.8038  | 0.621768 | -0.68555 | -1.60832 |
| Epdr1         | NM_134065         | 0.001172 | -8.26056 | 8.90172 | 9.58731 | 0.62175  | -0.68559 | -1.60836 |

|               |              |          |          |         |         |          |          |          |
|---------------|--------------|----------|----------|---------|---------|----------|----------|----------|
| Adamts2       | NM_175643    | 0.003875 | -6.003   | 8.22391 | 8.90981 | 0.621617 | -0.6859  | -1.60871 |
| 6330403K07Rik | NM_134022    | 0.004257 | -5.85075 | 4.64173 | 5.32767 | 0.621599 | -0.68595 | -1.60876 |
| Ndufa1        | NM_019443    | 0.003149 | -6.35109 | 7.53883 | 8.22602 | 0.621062 | -0.68719 | -1.61014 |
| Creb3l2       | NM_178661    | 0.001844 | -7.32926 | 7.06669 | 7.75401 | 0.621004 | -0.68733 | -1.61029 |
| Gtf3c6        | NM_026113    | 0.000535 | -10.1301 | 6.32819 | 7.01697 | 0.620377 | -0.68878 | -1.61192 |
| B4galt6       | NM_019737    | 0.001095 | -8.40869 | 6.03802 | 6.72735 | 0.620141 | -0.68933 | -1.61254 |
| Rab3gap2      | NM_001163754 | 0.001223 | -8.16817 | 7.33966 | 8.02989 | 0.619753 | -0.69024 | -1.61355 |
| Mir218-2      | NR_029799    | 0.002954 | -6.46148 | 3.94684 | 4.6371  | 0.619739 | -0.69027 | -1.61358 |
| Ypel4         | NM_001005342 | 0.0032   | -6.32339 | 6.47335 | 7.16367 | 0.619716 | -0.69032 | -1.61364 |
| Wnk3-ps       | BC043119     | 0.00446  | -5.77646 | 3.07202 | 3.76359 | 0.619179 | -0.69157 | -1.61504 |
| Uchl1         | NM_011670    | 0.005128 | -5.55869 | 4.87519 | 5.56824 | 0.618545 | -0.69305 | -1.6167  |
|               | ---          | 0.001619 | -7.58711 | 2.92089 | 3.61542 | 0.617912 | -0.69453 | -1.61835 |
| Parp6         | NM_029922    | 0.002916 | -6.48404 | 6.96376 | 7.65858 | 0.617785 | -0.69482 | -1.61869 |
| Ppp4r4        | NM_028980    | 0.001233 | -8.15135 | 2.98264 | 3.67814 | 0.617494 | -0.6955  | -1.61945 |
| Ap3s1         | NM_009681    | 0.000397 | -10.9342 | 7.87124 | 8.56734 | 0.617237 | -0.6961  | -1.62012 |
| Def6          | NM_027185    | 0.005495 | -5.45323 | 5.14385 | 5.84201 | 0.616355 | -0.69817 | -1.62244 |
| Adcy4         | NM_080435    | 0.005856 | -5.35749 | 5.11533 | 5.81383 | 0.616212 | -0.6985  | -1.62282 |
| Ptp4a1        | NM_011200    | 0.000448 | -10.6021 | 9.48196 | 10.1809 | 0.61603  | -0.69893 | -1.6233  |
|               | ---          | 0.006988 | -5.09899 | 8.49199 | 9.19103 | 0.615982 | -0.69904 | -1.62342 |
|               | ---          | 0.00021  | -12.8654 | 8.8195  | 9.51984 | 0.61543  | -0.70033 | -1.62488 |
| Stag3         | NM_016964    | 0.004895 | -5.63052 | 3.96093 | 4.6627  | 0.614819 | -0.70177 | -1.6265  |
| Nsmaf         | NM_010945    | 0.00552  | -5.44621 | 7.39571 | 8.09823 | 0.614499 | -0.70252 | -1.62734 |
| Ppib          | NM_011149    | 0.000783 | -9.17596 | 10.4618 | 11.1657 | 0.613893 | -0.70394 | -1.62895 |
| Mir143        | NR_029601    | 0.000828 | -9.04559 | 5.2099  | 5.91497 | 0.613409 | -0.70508 | -1.63023 |
| Srm           | NM_009272    | 0.001257 | -8.10967 | 7.82869 | 8.53432 | 0.613175 | -0.70563 | -1.63086 |
| Pou6f1        | NM_010127    | 0.003622 | -6.1146  | 5.57795 | 6.28439 | 0.612831 | -0.70644 | -1.63177 |
| Cln5          | NM_001033242 | 0.002341 | -6.878   | 6.90711 | 7.61385 | 0.612702 | -0.70674 | -1.63212 |
| Pgrmc1        | NM_016783    | 0.005597 | -5.42526 | 8.32517 | 9.03254 | 0.612437 | -0.70737 | -1.63282 |
| LOC100504530  | XM_003085484 | 0.005554 | -5.43707 | 3.07499 | 3.78244 | 0.612403 | -0.70745 | -1.63291 |
| LOC100504530  | XM_003085484 | 0.005554 | -5.43707 | 3.07499 | 3.78244 | 0.612403 | -0.70745 | -1.63291 |
| LOC100504530  | XM_003085484 | 0.005554 | -5.43707 | 3.07499 | 3.78244 | 0.612403 | -0.70745 | -1.63291 |



|               |              |          |          |         |         |          |          |          |
|---------------|--------------|----------|----------|---------|---------|----------|----------|----------|
| Spire1        | NM_194355    | 0.001826 | -7.34901 | 5.8615  | 6.56904 | 0.612362 | -0.70754 | -1.63302 |
| Hccs          | NM_008222    | 0.002913 | -6.4864  | 7.91245 | 8.62106 | 0.611909 | -0.70861 | -1.63423 |
|               | ---          | 0.001309 | -8.02343 | 8.3477  | 9.05719 | 0.611535 | -0.70949 | -1.63523 |
| 4930583H14Rik | NR_028121    | 0.004923 | -5.62169 | 3.37635 | 4.08594 | 0.611493 | -0.70959 | -1.63534 |
| Arhgap20      | NM_175535    | 0.000443 | -10.6307 | 3.98062 | 4.69034 | 0.61144  | -0.70972 | -1.63548 |
|               | ---          | 0.001404 | -7.87675 | 3.03022 | 3.73998 | 0.611425 | -0.70975 | -1.63552 |
| Zfp286        | NM_138949    | 0.004098 | -5.91194 | 3.86435 | 4.57532 | 0.610909 | -0.71097 | -1.63691 |
| Gm1973        | NM_029288    | 0.002836 | -6.53319 | 3.39965 | 4.11126 | 0.610641 | -0.7116  | -1.63762 |
| Slc35f5       | NM_028787    | 3.93E-05 | -19.6881 | 9.45344 | 10.1652 | 0.610579 | -0.71175 | -1.63779 |
| Evc           | NM_021292    | 8.52E-05 | -16.1871 | 7.02147 | 7.73444 | 0.610065 | -0.71297 | -1.63917 |
| 2310079N02Rik | NM_025636    | 0.000552 | -10.0443 | 5.93071 | 6.64467 | 0.609641 | -0.71397 | -1.64031 |
| Fam84b        | NM_001162926 | 0.001655 | -7.54317 | 4.75539 | 5.46973 | 0.609485 | -0.71434 | -1.64073 |
| Chsy1         | NM_001081163 | 0.005896 | -5.34745 | 8.94482 | 9.65987 | 0.609187 | -0.71504 | -1.64153 |
| Aebp1         | NM_009636    | 0.00104  | -8.52281 | 10.8639 | 11.5805 | 0.60851  | -0.71665 | -1.64336 |
| St5           | NM_001001326 | 0.006597 | -5.18215 | 7.09195 | 7.80972 | 0.608039 | -0.71777 | -1.64463 |
| Pdap1         | NM_001033313 | 0.00075  | -9.28119 | 6.91013 | 7.62976 | 0.607253 | -0.71963 | -1.64676 |
| Rsl1          | NM_001013769 | 0.004866 | -5.63961 | 5.11903 | 5.83963 | 0.606843 | -0.7206  | -1.64787 |
| Siva1         | NM_013929    | 0.000122 | -14.7829 | 6.00874 | 6.72986 | 0.606623 | -0.72113 | -1.64847 |
| Rnaseh1       | NM_011275    | 0.005142 | -5.55427 | 5.95366 | 6.6751  | 0.606491 | -0.72144 | -1.64883 |
| Lima1         | NM_001113545 | 0.00569  | -5.4005  | 9.02768 | 9.74947 | 0.606343 | -0.72179 | -1.64923 |
| Zfyve16       | NM_173392    | 0.005368 | -5.48854 | 6.38003 | 7.10448 | 0.605228 | -0.72445 | -1.65227 |
| Cox5a         | NM_007747    | 0.003208 | -6.31925 | 8.33331 | 9.05785 | 0.605191 | -0.72454 | -1.65237 |
| Serf1         | NM_011353    | 0.00311  | -6.37233 | 5.84675 | 6.57145 | 0.605123 | -0.7247  | -1.65256 |
| Fam151b       | NM_001163627 | 0.000688 | -9.49088 | 4.82106 | 5.54631 | 0.604891 | -0.72525 | -1.65319 |
| Ap3s1         | NM_009681    | 0.001003 | -8.60347 | 8.76141 | 9.48698 | 0.604759 | -0.72557 | -1.65355 |
| Pgf           | NM_008827    | 0.005181 | -5.54286 | 4.35098 | 5.07692 | 0.604599 | -0.72595 | -1.65399 |
| Hspg2         | NM_008305    | 0.000361 | -11.2031 | 8.07062 | 8.79684 | 0.604486 | -0.72622 | -1.6543  |
| Sucla2        | NM_011506    | 0.001938 | -7.23348 | 8.29478 | 9.02116 | 0.604417 | -0.72638 | -1.65449 |
| 1810063B07Rik | NM_026209    | 0.000173 | -13.5218 | 4.44148 | 5.16815 | 0.604298 | -0.72667 | -1.65481 |
| Nkd1          | NM_027280    | 0.000255 | -12.2507 | 5.22588 | 5.95308 | 0.604072 | -0.72721 | -1.65543 |
| Ssty2         | NM_023546    | 0.004002 | -5.95068 | 3.29194 | 4.02185 | 0.60294  | -0.72991 | -1.65854 |

|               |                                |          |          |         |         |          |          |          |
|---------------|--------------------------------|----------|----------|---------|---------|----------|----------|----------|
|               | ---                            | 0.002455 | -6.7909  | 10.1283 | 10.8585 | 0.602817 | -0.73021 | -1.65888 |
| Clasp2        | NM_001114347                   | 0.00174  | -7.44382 | 7.00438 | 7.73523 | 0.602548 | -0.73085 | -1.65962 |
|               | ---                            | 0.003177 | -6.33594 | 3.99407 | 4.72502 | 0.602508 | -0.73095 | -1.65973 |
| C530028O21Rik | NM_175696                      | 0.004903 | -5.62784 | 5.34596 | 6.07692 | 0.602506 | -0.73095 | -1.65973 |
| Rps4y2        | NR_003634                      | 8.43E-06 | -28.9875 | 5.14329 | 5.87441 | 0.602438 | -0.73112 | -1.65992 |
| Ap3s1         | NM_009681<br>ENSMUST0000010550 | 0.001446 | -7.81606 | 7.7998  | 8.53154 | 0.602178 | -0.73174 | -1.66064 |
| Foxo3         | 2                              | 0.002601 | -6.68655 | 9.4875  | 10.2211 | 0.601416 | -0.73357 | -1.66274 |
| Capn7         | NM_009796                      | 0.002889 | -6.50052 | 7.6681  | 8.40222 | 0.601184 | -0.73412 | -1.66338 |
|               | ---                            | 0.00075  | -9.27933 | 4.53963 | 5.27447 | 0.600884 | -0.73484 | -1.66421 |
| Lgmn          | NM_011175<br>ENSMUST0000016264 | 0.001019 | -8.56743 | 9.97883 | 10.7138 | 0.600836 | -0.73496 | -1.66435 |
| Zmiz1         | 5                              | 0.001439 | -7.82647 | 9.35754 | 10.0927 | 0.600746 | -0.73517 | -1.6646  |
| Gga2          | NM_028758                      | 0.000444 | -10.6236 | 7.07164 | 7.80761 | 0.600412 | -0.73598 | -1.66552 |
|               | ---                            | 0.003101 | -6.37768 | 8.34387 | 9.08006 | 0.600322 | -0.73619 | -1.66577 |
| Glul          | NM_008131                      | 0.005351 | -5.49345 | 8.334   | 9.07068 | 0.600119 | -0.73668 | -1.66633 |
| Prdx1         | NM_011034                      | 0.006417 | -5.22231 | 9.42972 | 10.1669 | 0.599931 | -0.73713 | -1.66686 |
| Slc29a3       | NM_023596                      | 0.000289 | -11.8629 | 6.79763 | 7.53497 | 0.599847 | -0.73733 | -1.66709 |
| Adk           | NM_134079                      | 0.00032  | -11.558  | 8.43894 | 9.17629 | 0.599839 | -0.73735 | -1.66711 |
| Ptp4a1        | NM_011200                      | 0.000258 | -12.2175 | 9.29059 | 10.0293 | 0.599283 | -0.73869 | -1.66866 |
| Traf3ip2      | NM_134000                      | 0.003882 | -6.00022 | 7.0453  | 7.78418 | 0.599203 | -0.73888 | -1.66888 |
| Sirt1         | NM_019812                      | 0.006237 | -5.26422 | 6.30955 | 7.04943 | 0.59879  | -0.73988 | -1.67004 |
| Copz2         | NM_019877                      | 0.000288 | -11.8769 | 9.34781 | 10.0878 | 0.598746 | -0.73999 | -1.67016 |
| Rfpl4b        | NM_001177783                   | 0.00235  | -6.87141 | 3.10628 | 3.8471  | 0.598396 | -0.74083 | -1.67113 |
| Lix1l         | NM_001163170                   | 0.000834 | -9.0279  | 9.10378 | 9.84576 | 0.597921 | -0.74197 | -1.67246 |
| Mpp1          | NM_008621                      | 0.000189 | -13.2282 | 8.11099 | 8.85452 | 0.597276 | -0.74353 | -1.67427 |
| Atp6v1h       | NM_133826                      | 0.001884 | -7.28765 | 8.22453 | 8.9689  | 0.596929 | -0.74437 | -1.67524 |
| Itga4         | NM_010576                      | 0.003228 | -6.30871 | 4.2314  | 4.97584 | 0.596899 | -0.74444 | -1.67532 |
| Ntan1         | NM_010946                      | 0.000442 | -10.6385 | 7.01446 | 7.76095 | 0.596051 | -0.74649 | -1.67771 |
| Copb2         | NM_015827                      | 0.006818 | -5.13427 | 9.94586 | 10.6924 | 0.596045 | -0.74651 | -1.67772 |
| LOC100041256  | BC089466                       | 0.001327 | -7.99453 | 3.42249 | 4.16946 | 0.595856 | -0.74697 | -1.67826 |
| Stc2          | NM_011491                      | 0.005169 | -5.54626 | 4.74885 | 5.50045 | 0.593947 | -0.75159 | -1.68365 |

|               |              |          |          |         |         |          |          |          |
|---------------|--------------|----------|----------|---------|---------|----------|----------|----------|
| Nptx1         | NM_008730    | 0.000924 | -8.78912 | 4.90077 | 5.65254 | 0.593875 | -0.75177 | -1.68386 |
|               | ---          | 0.003284 | -6.27919 | 4.38861 | 5.14082 | 0.593692 | -0.75221 | -1.68437 |
| Hhat          | NM_144881    | 0.000328 | -11.4901 | 4.92736 | 5.68094 | 0.593132 | -0.75357 | -1.68596 |
| Ptp4a1        | NM_011200    | 0.000214 | -12.8037 | 9.19081 | 9.94512 | 0.59283  | -0.75431 | -1.68682 |
| Lgals8        | NM_018886    | 0.000844 | -9.00013 | 8.80731 | 9.56232 | 0.592542 | -0.75501 | -1.68765 |
| Dusp19        | NM_024438    | 0.001735 | -7.44873 | 6.65051 | 7.40631 | 0.592218 | -0.7558  | -1.68857 |
|               | ---          | 0.004567 | -5.73894 | 8.68309 | 9.43957 | 0.591942 | -0.75647 | -1.68936 |
| Gnl3          | NM_153547    | 0.000506 | -10.2723 | 8.41154 | 9.16868 | 0.591664 | -0.75715 | -1.69015 |
| Cacnb2        | NM_023116    | 0.003665 | -6.09504 | 6.33926 | 7.09779 | 0.591096 | -0.75854 | -1.69177 |
| Zfp810        | NM_145612    | 0.002217 | -6.97889 | 4.06153 | 4.82026 | 0.591015 | -0.75873 | -1.692   |
| Zfp618        | NM_028326    | 0.005768 | -5.38007 | 5.01779 | 5.77662 | 0.590977 | -0.75883 | -1.69211 |
| Sec61b        | NM_024171    | 0.002381 | -6.84689 | 5.93515 | 6.69776 | 0.58943  | -0.76261 | -1.69655 |
| Ngly1         | NM_021504    | 0.001532 | -7.69762 | 7.09319 | 7.85631 | 0.58922  | -0.76312 | -1.69716 |
| Ear1          | NM_007894    | 0.000404 | -10.8849 | 3.57925 | 4.34381 | 0.588636 | -0.76455 | -1.69884 |
|               | ---          | 0.002604 | -6.68491 | 3.23616 | 4.00079 | 0.588601 | -0.76464 | -1.69894 |
| Bdh2          | NM_001172055 | 0.006095 | -5.29812 | 8.37727 | 9.14458 | 0.587509 | -0.76732 | -1.7021  |
| Ifi2711       | NM_026790    | 0.002623 | -6.67201 | 8.744   | 9.51195 | 0.587251 | -0.76795 | -1.70285 |
| Hoxd9         | NM_013555    | 0.000284 | -11.9182 | 4.99532 | 5.7636  | 0.58712  | -0.76827 | -1.70323 |
| Gk5           | NM_177352    | 0.005879 | -5.35178 | 5.77139 | 6.54039 | 0.586824 | -0.769   | -1.70409 |
| Camp          | NM_009921    | 0.004404 | -5.79672 | 4.9171  | 5.68768 | 0.586184 | -0.77057 | -1.70595 |
| Nbas          | NM_027706    | 0.001287 | -8.05888 | 6.80747 | 7.57846 | 0.586016 | -0.77099 | -1.70644 |
| Sec61b        | NM_024171    | 0.002632 | -6.66585 | 6.58229 | 7.35357 | 0.5859   | -0.77128 | -1.70678 |
| Hoxb8         | NM_010461    | 0.003055 | -6.40343 | 4.76012 | 5.53172 | 0.585767 | -0.7716  | -1.70716 |
| E130311K13Rik | BC125500     | 0.000725 | -9.36295 | 6.43032 | 7.20202 | 0.585725 | -0.77171 | -1.70729 |
| Ddx50         | NM_053183    | 1.20E-05 | -26.5042 | 8.50824 | 9.2802  | 0.58562  | -0.77196 | -1.70759 |
| Gm13363       | NR_002688    | 0.000376 | -11.092  | 9.12066 | 9.8927  | 0.58559  | -0.77204 | -1.70768 |
|               | ---          | 0.001695 | -7.49464 | 3.22769 | 4.00027 | 0.585367 | -0.77259 | -1.70833 |
| Reep5         | NM_007874    | 0.000341 | -11.3707 | 8.00581 | 8.77858 | 0.585292 | -0.77277 | -1.70855 |
| Vill          | NM_001164567 | 0.005783 | -5.37636 | 5.38597 | 6.15895 | 0.585207 | -0.77298 | -1.7088  |
|               | ---          | 0.000757 | -9.25753 | 3.39449 | 4.16751 | 0.585191 | -0.77302 | -1.70884 |
| Rtl1          | NM_184109    | 0.0013   | -8.03874 | 5.05217 | 5.82882 | 0.583719 | -0.77665 | -1.71315 |

|          |              |          |          |         |         |          |          |          |
|----------|--------------|----------|----------|---------|---------|----------|----------|----------|
| Qsox1    | NM_001024945 | 0.000628 | -9.71791 | 9.38057 | 10.1578 | 0.583482 | -0.77724 | -1.71385 |
| Adamts10 | NM_172619    | 0.001291 | -8.05257 | 6.312   | 7.08942 | 0.583412 | -0.77741 | -1.71405 |
| Ssty2    | NM_023546    | 0.002462 | -6.7858  | 3.35442 | 4.13215 | 0.583283 | -0.77773 | -1.71443 |
| Uggt2    | NM_001081252 | 0.003973 | -5.96249 | 7.80299 | 8.58101 | 0.583168 | -0.77802 | -1.71477 |
| Ssty2    | NM_023546    | 0.005603 | -5.42367 | 3.06537 | 3.84343 | 0.58315  | -0.77806 | -1.71482 |
|          | ---          | 3.19E-05 | -20.7434 | 8.88303 | 9.66134 | 0.58305  | -0.77831 | -1.71512 |
| Smpd2    | NM_009213    | 0.002339 | -6.88014 | 7.09906 | 7.87827 | 0.582686 | -0.77921 | -1.71619 |
| Galnt2   | NM_139272    | 0.001998 | -7.17464 | 8.09585 | 8.87619 | 0.582231 | -0.78034 | -1.71753 |
| Tmed8    | NM_001033475 | 0.005858 | -5.35715 | 5.70388 | 6.48538 | 0.581759 | -0.78151 | -1.71892 |
| Tet1     | NM_027384    | 0.0055   | -5.45175 | 4.12637 | 4.9084  | 0.581546 | -0.78203 | -1.71955 |
| Akap11   | NM_001164503 | 0.005248 | -5.52299 | 8.14317 | 8.92568 | 0.581357 | -0.78251 | -1.72011 |
| Ssty2    | NM_023546    | 0.005731 | -5.38974 | 3.54474 | 4.32846 | 0.580867 | -0.78372 | -1.72157 |
|          | ---          | 0.004484 | -5.76801 | 5.57244 | 6.35675 | 0.580632 | -0.7843  | -1.72226 |
| Dnaja4   | NM_021422    | 0.000811 | -9.09425 | 6.69647 | 7.48174 | 0.580246 | -0.78526 | -1.72341 |
| Ifnar1   | NM_010508    | 0.000158 | -13.8421 | 7.72    | 8.50565 | 0.580093 | -0.78565 | -1.72386 |
| Pja1     | NM_001083110 | 0.003106 | -6.37474 | 7.37155 | 8.15968 | 0.579094 | -0.78813 | -1.72683 |
| Btbd6    | NM_201646    | 0.000349 | -11.3038 | 5.21733 | 6.00618 | 0.578803 | -0.78886 | -1.7277  |
| Foxo3    | NM_019740    | 0.001282 | -8.06822 | 8.00728 | 8.79637 | 0.578709 | -0.78909 | -1.72799 |
| Ifitm5   | NM_053088    | 0.006916 | -5.11378 | 6.07252 | 6.86178 | 0.57864  | -0.78926 | -1.72819 |
| Prickle3 | NM_175097    | 0.005982 | -5.32592 | 4.81715 | 5.60659 | 0.578571 | -0.78944 | -1.7284  |
| Rhobtb3  | NM_028493    | 0.000458 | -10.5419 | 7.32523 | 8.11508 | 0.578407 | -0.78984 | -1.72889 |
| Pias2    | NM_001164168 | 0.000414 | -10.8222 | 7.70253 | 8.49374 | 0.577859 | -0.79121 | -1.73053 |
| Rpl11    | NM_025919    | 0.004354 | -5.81485 | 9.04033 | 9.83226 | 0.577572 | -0.79193 | -1.73138 |
| Kdr      | NM_010612    | 0.005378 | -5.48585 | 3.92253 | 4.71491 | 0.577392 | -0.79238 | -1.73193 |
| Txndc5   | NM_145367    | 0.000905 | -8.83662 | 9.68875 | 10.4819 | 0.577086 | -0.79314 | -1.73284 |
| Pls3     | NM_145629    | 0.005877 | -5.35229 | 9.84616 | 10.6405 | 0.576602 | -0.79435 | -1.7343  |
| Gm7120   | NM_001039244 | 0.004147 | -5.8931  | 7.29665 | 8.09165 | 0.576342 | -0.795   | -1.73508 |
| Ltbr     | NM_010736    | 0.001672 | -7.52218 | 7.25207 | 8.04713 | 0.576321 | -0.79506 | -1.73515 |
| Mrpl24   | NM_026591    | 0.006524 | -5.19813 | 8.39495 | 9.19079 | 0.576008 | -0.79584 | -1.73609 |
| Dpm2     | NM_010073    | 0.003904 | -5.99083 | 7.97171 | 8.768   | 0.575828 | -0.79629 | -1.73663 |
| Gm1973   | NM_029288    | 0.000131 | -14.5176 | 3.10764 | 3.90443 | 0.575626 | -0.7968  | -1.73724 |

|               | ENSMUST0000009750 |          |          |         |         |          |          |          |
|---------------|-------------------|----------|----------|---------|---------|----------|----------|----------|
| Gm10524       | 3                 | 0.003031 | -6.41712 | 5.96461 | 6.76272 | 0.575102 | -0.79811 | -1.73882 |
| Kcnma1        | NM_010610         | 0.005371 | -5.48782 | 4.10733 | 4.90562 | 0.57503  | -0.79829 | -1.73904 |
| Fam36a        | NM_025511         | 0.000244 | -12.3834 | 6.43737 | 7.23612 | 0.574847 | -0.79875 | -1.73959 |
| Tmcc2         | NM_178874         | 0.002035 | -7.14006 | 5.0029  | 5.80336 | 0.574169 | -0.80045 | -1.74165 |
| Anks6         | NM_001024136      | 0.002288 | -6.92044 | 4.48188 | 5.28288 | 0.573949 | -0.80101 | -1.74231 |
| Diap2         | NM_172493         | 0.004852 | -5.64429 | 6.39251 | 7.19454 | 0.573541 | -0.80203 | -1.74355 |
| Fgfr1         | NM_010206         | 0.003391 | -6.22497 | 9.13051 | 9.93281 | 0.573435 | -0.8023  | -1.74388 |
| Nln           | NM_029447         | 0.003222 | -6.31208 | 6.80705 | 7.61028 | 0.573064 | -0.80323 | -1.74501 |
| Fzd7          | NM_008057         | 0.002917 | -6.48348 | 8.31789 | 9.12135 | 0.572972 | -0.80346 | -1.74528 |
| Fut11         | NM_028428         | 0.000187 | -13.2585 | 7.34498 | 8.14927 | 0.572642 | -0.80429 | -1.74629 |
| Stag1         | NM_009282         | 0.000129 | -14.5791 | 8.13958 | 8.94481 | 0.572271 | -0.80523 | -1.74742 |
| Steap3        | NM_001085409      | 0.001174 | -8.25574 | 8.62457 | 9.43187 | 0.571448 | -0.80731 | -1.74994 |
| Tmem167       | NM_025335         | 0.005022 | -5.59071 | 8.27106 | 9.07932 | 0.571071 | -0.80826 | -1.7511  |
| Arl15         | NM_172595         | 0.002164 | -7.02374 | 7.24197 | 8.05079 | 0.570852 | -0.80881 | -1.75177 |
| Ehd3          | NM_020578         | 0.002104 | -7.07703 | 5.54012 | 6.34946 | 0.570643 | -0.80934 | -1.75241 |
| Slc25a1       | NM_153150         | 0.000123 | -14.755  | 7.65764 | 8.46698 | 0.570641 | -0.80934 | -1.75241 |
| Pgm3          | NM_028352         | 0.005026 | -5.58943 | 6.72558 | 7.53807 | 0.569399 | -0.81249 | -1.75624 |
| Npc2          | NM_023409         | 0.001961 | -7.21042 | 9.40582 | 10.2193 | 0.569022 | -0.81344 | -1.7574  |
| Mir496        | NR_030437         | 0.000944 | -8.73974 | 3.02283 | 3.83661 | 0.568887 | -0.81379 | -1.75782 |
| 6720456H2ORik | NM_172600         | 0.000473 | -10.4536 | 6.45283 | 7.26746 | 0.568553 | -0.81463 | -1.75885 |
| Ssr1          | NM_025965         | 0.002061 | -7.11572 | 9.29653 | 10.1132 | 0.567769 | -0.81662 | -1.76128 |
| Fam38a        | NM_001037298      | 0.005104 | -5.56589 | 7.76481 | 8.58299 | 0.567158 | -0.81818 | -1.76318 |
| Tm9sf2        | NM_080556         | 0.001512 | -7.72465 | 9.52955 | 10.3478 | 0.567113 | -0.81829 | -1.76332 |
|               | ---               | 0.003619 | -6.11583 | 6.96873 | 7.7878  | 0.566808 | -0.81907 | -1.76427 |
| Igsf8         | NM_080419         | 0.000604 | -9.81745 | 6.40397 | 7.22443 | 0.566265 | -0.82045 | -1.76596 |
| Adamtsl1      | NM_029967         | 0.00267  | -6.64018 | 4.68161 | 5.50261 | 0.56605  | -0.821   | -1.76663 |
| Lrrc49        | NM_145616         | 0.001014 | -8.57949 | 7.52544 | 8.34669 | 0.565952 | -0.82125 | -1.76693 |
| Isca1         | NM_026921         | 0.002777 | -6.57035 | 8.02769 | 8.84948 | 0.56574  | -0.82179 | -1.7676  |
| Cpt1c         | NM_153679         | 0.004836 | -5.64931 | 7.24462 | 8.06671 | 0.565621 | -0.82209 | -1.76797 |
| Gpc6          | NM_001079844      | 0.005257 | -5.52044 | 8.20359 | 9.02645 | 0.565318 | -0.82286 | -1.76891 |

|               |              |          |          |         |         |          |          |          |
|---------------|--------------|----------|----------|---------|---------|----------|----------|----------|
| rp9           | NM_018739    | 0.004651 | -5.71027 | 6.16205 | 6.98603 | 0.564882 | -0.82398 | -1.77028 |
| Lpgat1        | NM_001134829 | 0.003103 | -6.37643 | 7.85844 | 8.68355 | 0.564438 | -0.82511 | -1.77167 |
| Gm3579        | AY140896     | 0.006384 | -5.22987 | 3.7509  | 4.57718 | 0.563981 | -0.82628 | -1.77311 |
| Arsg          | NM_028710    | 0.002579 | -6.70216 | 5.19249 | 6.01889 | 0.563932 | -0.82641 | -1.77326 |
| Zc3h12c       | NM_001162921 | 0.000254 | -12.2677 | 6.96599 | 7.79252 | 0.563884 | -0.82653 | -1.77341 |
| Synpo2        | NM_080451    | 0.001313 | -8.01803 | 4.42007 | 5.24732 | 0.563599 | -0.82726 | -1.77431 |
| C2cd2         | NM_174847    | 0.003892 | -5.99589 | 5.59396 | 6.42211 | 0.563252 | -0.82815 | -1.7754  |
| Adam33        | NM_033615    | 0.000815 | -9.08256 | 5.6442  | 6.47235 | 0.563251 | -0.82815 | -1.77541 |
| Prrc1         | NM_028447    | 0.001071 | -8.45666 | 7.34701 | 8.17556 | 0.563096 | -0.82855 | -1.77589 |
| Serinc5       | NM_172588    | 0.000983 | -8.64781 | 8.04385 | 8.87433 | 0.562343 | -0.83048 | -1.77828 |
| Ptpn9         | NM_019651    | 0.001015 | -8.57704 | 7.53885 | 8.37079 | 0.561771 | -0.83195 | -1.78008 |
| Nrip1         | NM_173440    | 0.000359 | -11.2265 | 6.62155 | 7.45458 | 0.56135  | -0.83303 | -1.78142 |
| Fmn1          | NM_010230    | 0.001671 | -7.52389 | 5.31411 | 6.14774 | 0.561117 | -0.83363 | -1.78216 |
|               | ---          | 0.003938 | -5.97683 | 7.04936 | 7.88367 | 0.560849 | -0.83432 | -1.78301 |
| Mir381        | NR_029882    | 0.000858 | -8.96105 | 2.8024  | 3.63696 | 0.560753 | -0.83456 | -1.78332 |
| Rab40b        | NM_139147    | 0.004556 | -5.74276 | 5.00616 | 5.84129 | 0.560532 | -0.83513 | -1.78402 |
| Tmem39a       | NM_026407    | 0.002838 | -6.53218 | 9.37293 | 10.2105 | 0.55959  | -0.83756 | -1.78702 |
| B4galt1       | NM_022305    | 0.00013  | -14.535  | 8.86526 | 9.7032  | 0.559441 | -0.83794 | -1.7875  |
| Plxna2        | NM_008882    | 0.002971 | -6.45197 | 6.28973 | 7.12795 | 0.559332 | -0.83822 | -1.78785 |
| Cmpk1         | NM_025647    | 0.004627 | -5.71859 | 7.86884 | 8.70819 | 0.558895 | -0.83935 | -1.78924 |
| Emilin1       | NM_133918    | 0.004003 | -5.95028 | 8.65823 | 9.49884 | 0.558406 | -0.84061 | -1.79081 |
| Gm8008        | XM_001477516 | 0.004714 | -5.68938 | 3.9543  | 4.79505 | 0.558353 | -0.84075 | -1.79098 |
| Gm13251       | NM_001085522 | 0.000272 | -12.0542 | 8.88102 | 9.72226 | 0.558164 | -0.84124 | -1.79159 |
| LOC100504530  | XM_003085484 | 0.003076 | -6.39177 | 3.25864 | 4.09991 | 0.558152 | -0.84127 | -1.79163 |
| LOC100504530  | XM_003085484 | 0.003076 | -6.39177 | 3.25864 | 4.09991 | 0.558152 | -0.84127 | -1.79163 |
| Rab18         | NM_181070    | 0.003913 | -5.98728 | 8.71148 | 9.55281 | 0.55813  | -0.84133 | -1.7917  |
| 2310008H04Rik | BC089026     | 0.006191 | -5.27514 | 6.6411  | 7.48261 | 0.558058 | -0.84151 | -1.79193 |
| Parp16        | NM_177460    | 0.001852 | -7.32143 | 5.06328 | 5.90681 | 0.557277 | -0.84353 | -1.79444 |
|               | ---          | 0.004467 | -5.7739  | 6.62295 | 7.46748 | 0.556892 | -0.84453 | -1.79568 |
| Sntb2         | NM_009229    | 0.003552 | -6.14706 | 7.45142 | 8.29765 | 0.556234 | -0.84624 | -1.7978  |
| Ehhadh        | NM_023737    | 0.003864 | -6.00794 | 4.09717 | 4.94422 | 0.555921 | -0.84705 | -1.79882 |

|               |              |          |          |         |         |          |          |          |
|---------------|--------------|----------|----------|---------|---------|----------|----------|----------|
| Gm2695        | XR_106736    | 0.002305 | -6.90664 | 7.39047 | 8.23784 | 0.555799 | -0.84737 | -1.79921 |
| Tbc1d8b       | NM_001081499 | 0.001738 | -7.44521 | 8.01342 | 8.86276 | 0.555035 | -0.84935 | -1.80169 |
| Atp7a         | NM_001109757 | 0.001256 | -8.11185 | 7.32636 | 8.17574 | 0.555024 | -0.84938 | -1.80173 |
| D830030K20Rik | NM_177135    | 0.004156 | -5.8895  | 2.51801 | 3.3675  | 0.554981 | -0.84949 | -1.80186 |
| Fam102a       | NM_153560    | 0.005705 | -5.39672 | 6.56595 | 7.41737 | 0.554238 | -0.85142 | -1.80428 |
| Gm1973        | NM_029288    | 1.02E-05 | -27.6301 | 3.72155 | 4.57402 | 0.553834 | -0.85248 | -1.8056  |
| Gm1973        | NM_029288    | 2.81E-05 | -21.4191 | 3.10107 | 3.95469 | 0.553397 | -0.85361 | -1.80702 |
| Gm1973        | NM_029288    | 2.81E-05 | -21.4191 | 3.10107 | 3.95469 | 0.553397 | -0.85361 | -1.80702 |
| Tceal8        | NM_001168578 | 0.000237 | -12.4854 | 8.59779 | 9.4517  | 0.55328  | -0.85392 | -1.8074  |
| Ssty2         | NM_023546    | 0.003665 | -6.09484 | 3.54961 | 4.40375 | 0.553195 | -0.85414 | -1.80768 |
|               | ---          | 0.001124 | -8.35072 | 7.32907 | 8.18354 | 0.553069 | -0.85447 | -1.80809 |
|               | ---          | 8.04E-05 | -16.4249 | 4.54472 | 5.39965 | 0.552894 | -0.85492 | -1.80866 |
| Akap11        | NM_001164503 | 0.002107 | -7.07464 | 8.63686 | 9.49234 | 0.55268  | -0.85549 | -1.80937 |
| Zmat3         | NM_009517    | 0.001814 | -7.36182 | 5.84923 | 6.70585 | 0.552247 | -0.85662 | -1.81079 |
| Mrv1          | NM_010826    | 0.00085  | -8.98228 | 4.23114 | 5.089   | 0.551769 | -0.85786 | -1.81235 |
| Stat3         | NM_213659    | 0.0023   | -6.91086 | 9.22176 | 10.0817 | 0.550964 | -0.85997 | -1.815   |
| Tspan6        | NM_019656    | 0.003141 | -6.35539 | 8.23321 | 9.0934  | 0.55088  | -0.86019 | -1.81528 |
|               | ---          | 0.00113  | -8.34033 | 9.21728 | 10.0784 | 0.550521 | -0.86113 | -1.81646 |
| Cacnb1        | NM_031173    | 0.001545 | -7.68147 | 4.91656 | 5.77813 | 0.550351 | -0.86158 | -1.81702 |
| Col23a1       | NM_153393    | 0.001715 | -7.47207 | 5.83525 | 6.69705 | 0.550266 | -0.8618  | -1.8173  |
| Pde11a        | NM_001081033 | 0.000148 | -14.0729 | 4.60377 | 5.46615 | 0.550047 | -0.86237 | -1.81803 |
|               | ---          | 0.006665 | -5.16709 | 9.51776 | 10.3806 | 0.549882 | -0.86281 | -1.81857 |
| Acaa1a        | NM_130864    | 0.004825 | -5.65302 | 6.84996 | 7.71319 | 0.54972  | -0.86323 | -1.81911 |
| Sik2          | NM_178710    | 2.29E-05 | -22.5492 | 6.87921 | 7.74309 | 0.549472 | -0.86388 | -1.81993 |
| Ifitm2        | NM_030694    | 0.003902 | -5.99196 | 10.0931 | 10.9573 | 0.549356 | -0.86419 | -1.82031 |
| Mir145        | NR_029557    | 0.005395 | -5.48112 | 5.87656 | 6.74108 | 0.549228 | -0.86452 | -1.82074 |
| Gpr180        | NM_021434    | 0.003486 | -6.17841 | 6.56061 | 7.42523 | 0.549192 | -0.86462 | -1.82086 |
| Map4k4        | NM_008696    | 6.34E-05 | -17.4418 | 8.16915 | 9.03447 | 0.548924 | -0.86532 | -1.82175 |
| Ubt2          | NM_173784    | 0.001619 | -7.58636 | 8.2724  | 9.13808 | 0.548787 | -0.86568 | -1.8222  |
| Npc1          | NM_008720    | 0.00061  | -9.79095 | 7.91234 | 8.77806 | 0.54877  | -0.86573 | -1.82226 |
| Fbxl7         | BC050864     | 0.000354 | -11.2666 | 3.43841 | 4.30457 | 0.548607 | -0.86616 | -1.8228  |

|              |              |          |          |         |         |          |          |          |
|--------------|--------------|----------|----------|---------|---------|----------|----------|----------|
| Slc38a10     | NM_024249    | 0.003856 | -6.01112 | 8.13419 | 9.00058 | 0.548516 | -0.86639 | -1.8231  |
| Nup93        | NM_172410    | 0.002027 | -7.14735 | 8.41614 | 9.28397 | 0.547969 | -0.86783 | -1.82492 |
| Ssty2        | NM_023546    | 0.005712 | -5.39489 | 3.30081 | 4.1692  | 0.547755 | -0.8684  | -1.82563 |
| Gm10035      | NM_001081471 | 0.00079  | -9.15693 | 5.6535  | 6.52217 | 0.547653 | -0.86867 | -1.82597 |
| Ankrd57      | NM_172939    | 0.000396 | -10.947  | 5.67037 | 6.53956 | 0.547457 | -0.86918 | -1.82663 |
| Cln3         | NM_001146311 | 0.005596 | -5.42557 | 5.94843 | 6.8189  | 0.54697  | -0.87047 | -1.82826 |
| Ankrd44      | NM_001081433 | 0.003622 | -6.11475 | 5.75578 | 6.62639 | 0.546916 | -0.87061 | -1.82843 |
| Dio2         | NM_010050    | 0.000706 | -9.42669 | 4.15191 | 5.02435 | 0.546224 | -0.87244 | -1.83075 |
| Cep350       | NM_001039184 | 0.000181 | -13.3677 | 5.0264  | 5.90057 | 0.545568 | -0.87417 | -1.83295 |
| Crem         | NM_001110856 | 0.006286 | -5.25266 | 4.75252 | 5.62728 | 0.545345 | -0.87476 | -1.8337  |
| Fam158a      | AB054001     | 0.001341 | -7.97246 | 5.66261 | 6.53806 | 0.545085 | -0.87545 | -1.83458 |
| Nr4a3        | NM_015743    | 0.004099 | -5.91169 | 4.87806 | 5.75372 | 0.545004 | -0.87566 | -1.83485 |
| Xk           | NM_023500    | 0.003138 | -6.35733 | 4.47382 | 5.34967 | 0.54493  | -0.87586 | -1.8351  |
|              | ---          | 0.005847 | -5.3598  | 6.20831 | 7.08726 | 0.543762 | -0.87895 | -1.83904 |
| Zfp395       | NM_199029    | 0.003159 | -6.3459  | 6.32503 | 7.2041  | 0.543718 | -0.87907 | -1.83919 |
| Higd1a       | NM_019814    | 0.002596 | -6.69016 | 5.03199 | 5.91132 | 0.543621 | -0.87933 | -1.83952 |
|              | ---          | 0.000662 | -9.5849  | 9.04545 | 9.92533 | 0.543413 | -0.87988 | -1.84022 |
| D14Ertd449e  | NM_025311    | 0.000877 | -8.90975 | 6.93729 | 7.81987 | 0.542394 | -0.88259 | -1.84368 |
| Mbnl2        | NM_175341    | 0.002062 | -7.11507 | 9.71312 | 10.5963 | 0.542163 | -0.8832  | -1.84446 |
| Ankrd6       | NM_001012450 | 0.004646 | -5.71217 | 5.03387 | 5.91727 | 0.542088 | -0.8834  | -1.84472 |
| Rpl11        | NM_025919    | 0.003278 | -6.28233 | 10.2543 | 11.1377 | 0.542079 | -0.88343 | -1.84475 |
| Zcchc3       | NM_175126    | 0.000111 | -15.1537 | 4.65985 | 5.54345 | 0.542013 | -0.8836  | -1.84498 |
| LOC100040031 | BC089467     | 0.002183 | -7.00815 | 3.63625 | 4.52048 | 0.541775 | -0.88423 | -1.84578 |
| Fbln2        | NM_007992    | 0.003311 | -6.26539 | 10.7665 | 11.6518 | 0.54138  | -0.88529 | -1.84713 |
| L3mbtl3      | NM_172787    | 6.97E-05 | -17.0331 | 7.35421 | 8.2397  | 0.541302 | -0.88549 | -1.8474  |
| Isca1        | NM_026921    | 0.002123 | -7.06024 | 8.57942 | 9.46508 | 0.541238 | -0.88567 | -1.84762 |
| D14Ertd449e  | NM_025311    | 0.000826 | -9.0504  | 7.43062 | 8.31668 | 0.54109  | -0.88606 | -1.84812 |
| Rpl11        | NM_025919    | 0.001499 | -7.74236 | 10.6535 | 11.54   | 0.540916 | -0.88652 | -1.84872 |
|              | ---          | 0.00662  | -5.17707 | 3.06984 | 3.95694 | 0.5407   | -0.8871  | -1.84946 |
| Igfbp7       | NM_001159518 | 0.001954 | -7.21814 | 10.1533 | 11.0406 | 0.54065  | -0.88723 | -1.84963 |
| Rps12        | NM_011295    | 0.004722 | -5.68666 | 10.3816 | 11.2692 | 0.540524 | -0.88757 | -1.85006 |



|               |                        |          |          |         |         |          |          |          |
|---------------|------------------------|----------|----------|---------|---------|----------|----------|----------|
| D14Erttd449e  | NM_025311              | 0.00077  | -9.21769 | 7.26162 | 8.15088 | 0.539889 | -0.88926 | -1.85223 |
| Abhd14a       | NM_001110271           | 0.000856 | -8.96653 | 5.96335 | 6.85398 | 0.539376 | -0.89064 | -1.85399 |
| Akap11        | NM_001164503           | 0.001825 | -7.34976 | 7.99491 | 8.88583 | 0.539269 | -0.89092 | -1.85436 |
| Nod1          | NM_172729              | 0.002024 | -7.14999 | 5.80076 | 6.6926  | 0.538928 | -0.89184 | -1.85554 |
| Rps12         | NM_011295              | 0.005446 | -5.46671 | 10.2169 | 11.1102 | 0.538411 | -0.89322 | -1.85732 |
| Carm1         | NM_021531              | 0.000477 | -10.4338 | 7.20834 | 8.10259 | 0.538028 | -0.89425 | -1.85864 |
| Zfp9          | NM_011763              | 4.76E-05 | -18.757  | 6.02037 | 6.9147  | 0.537997 | -0.89433 | -1.85875 |
| Zadh2         | NM_146090              | 0.000855 | -8.97015 | 7.55453 | 8.44894 | 0.537968 | -0.89441 | -1.85885 |
| Yipf5         | NM_023311              | 0.001496 | -7.74622 | 7.87906 | 8.77394 | 0.537793 | -0.89488 | -1.85945 |
| Lmna          | NM_001002011           | 0.00033  | -11.471  | 8.42439 | 9.31933 | 0.537771 | -0.89494 | -1.85953 |
| Rps12         | NM_011295              | 0.005646 | -5.41228 | 10.4501 | 11.3492 | 0.536223 | -0.8991  | -1.8649  |
| LOC100039753  | NM_001017394           | 0.005293 | -5.50999 | 3.47412 | 4.37324 | 0.536212 | -0.89912 | -1.86493 |
| Rps12         | NM_011295              | 0.003581 | -6.1334  | 10.2456 | 11.1449 | 0.536126 | -0.89936 | -1.86523 |
| Prr5          | NM_146061              | 0.000446 | -10.6113 | 5.87343 | 6.77306 | 0.536025 | -0.89963 | -1.86559 |
| Naaladl2      | ENSMUST0000009918<br>4 | 0.000105 | -15.3512 | 3.73465 | 4.63585 | 0.53544  | -0.9012  | -1.86762 |
| Rps12         | NM_011295              | 0.005086 | -5.57118 | 10.7455 | 11.6478 | 0.535029 | -0.90231 | -1.86906 |
| Igdcc4        | NM_020043              | 0.006848 | -5.1279  | 4.72359 | 5.62641 | 0.534841 | -0.90282 | -1.86971 |
| Zbtb4         | NM_029348              | 0.003743 | -6.06032 | 5.82986 | 6.73531 | 0.533868 | -0.90545 | -1.87312 |
| Pqlc3         | NM_172574              | 0.006997 | -5.09698 | 7.61887 | 8.52559 | 0.533394 | -0.90673 | -1.87479 |
| Acpl2         | NM_153420              | 0.00301  | -6.42932 | 6.11898 | 7.0263  | 0.533177 | -0.90731 | -1.87555 |
| Acot6         | NM_172580              | 0.001004 | -8.60104 | 3.82643 | 4.73458 | 0.532866 | -0.90816 | -1.87664 |
| Tead3         | NM_001098226           | 0.001769 | -7.41095 | 6.25516 | 7.16535 | 0.532117 | -0.91019 | -1.87929 |
| Ppp1r3b       | NM_177741              | 5.57E-05 | -18.0224 | 4.78259 | 5.69331 | 0.531919 | -0.91072 | -1.87999 |
| Sh3kbp1       | NM_021389              | 0.001642 | -7.55789 | 8.24575 | 9.15669 | 0.531838 | -0.91094 | -1.88027 |
| D830030K20Rik | NM_177135              | 0.00651  | -5.20143 | 3.20707 | 4.11892 | 0.531503 | -0.91185 | -1.88146 |
| Rpl11         | NM_025919              | 0.002302 | -6.90941 | 10.7628 | 11.6769 | 0.530695 | -0.91404 | -1.88432 |
| Sptlc2        | NM_011479              | 0.000255 | -12.249  | 8.45977 | 9.37399 | 0.530629 | -0.91422 | -1.88456 |
| 1700025G04Rik | NM_197990              | 0.001771 | -7.40861 | 4.90578 | 5.82061 | 0.530405 | -0.91483 | -1.88535 |
|               | ---                    | 0.0047   | -5.6938  | 9.33252 | 10.2479 | 0.530221 | -0.91534 | -1.88601 |
| Slc37a4       | NM_008063              | 0.002226 | -6.97138 | 5.66949 | 6.58486 | 0.530207 | -0.91537 | -1.88605 |

|              |              |          |          |         |         |          |          |          |
|--------------|--------------|----------|----------|---------|---------|----------|----------|----------|
| Jph1         | NM_020604    | 0.001649 | -7.55032 | 5.22841 | 6.14449 | 0.529946 | -0.91608 | -1.88698 |
| Lypla2       | NM_011942    | 0.006097 | -5.29773 | 6.59624 | 7.51298 | 0.529704 | -0.91674 | -1.88785 |
|              | ---          | 0.004159 | -5.88837 | 4.45997 | 5.37704 | 0.529583 | -0.91707 | -1.88828 |
| Scap         | NM_001001144 | 0.00304  | -6.41173 | 7.74019 | 8.65847 | 0.52914  | -0.91828 | -1.88986 |
|              | ---          | 0.000336 | -11.4176 | 2.8214  | 3.73976 | 0.529111 | -0.91836 | -1.88996 |
| Adam17       | NM_009615    | 0.00068  | -9.5207  | 8.66201 | 9.58076 | 0.528966 | -0.91875 | -1.89048 |
| Fbxo17       | NM_015796    | 0.002797 | -6.55723 | 4.84246 | 5.7623  | 0.528569 | -0.91984 | -1.8919  |
| Golga7       | NM_020585    | 0.006042 | -5.31112 | 8.96329 | 9.88434 | 0.528125 | -0.92105 | -1.89349 |
|              | ---          | 0.006048 | -5.30946 | 4.01094 | 4.93442 | 0.527236 | -0.92348 | -1.89668 |
| Bmyc         | NM_023326    | 8.91E-05 | -16.0045 | 5.63387 | 6.55797 | 0.527009 | -0.9241  | -1.8975  |
| Chmp1a       | NM_145606    | 0.001292 | -8.05166 | 7.54314 | 8.46748 | 0.526921 | -0.92434 | -1.89782 |
| Icosl        | NM_015790    | 0.006331 | -5.24207 | 4.90874 | 5.8334  | 0.526804 | -0.92466 | -1.89824 |
| Tcf12        | NM_011544    | 0.000182 | -13.348  | 8.88722 | 9.81199 | 0.526763 | -0.92477 | -1.89839 |
| Ndufc2       | NM_024220    | 0.000379 | -11.0654 | 8.98035 | 9.90595 | 0.526461 | -0.9256  | -1.89948 |
| Osgep        | NM_133676    | 0.0011   | -8.39873 | 6.17314 | 7.10138 | 0.5255   | -0.92824 | -1.90295 |
| Mir409       | NR_029913    | 0.000951 | -8.72382 | 3.99038 | 4.91896 | 0.525374 | -0.92858 | -1.90341 |
| Cdk7         | NM_009874    | 0.001985 | -7.18714 | 6.57093 | 7.50219 | 0.524398 | -0.93127 | -1.90695 |
| Cd164        | NM_016898    | 0.004132 | -5.89885 | 10.5155 | 11.4486 | 0.523716 | -0.93314 | -1.90943 |
| Soat1        | NM_009230    | 0.003816 | -6.0284  | 8.56053 | 9.49422 | 0.52352  | -0.93368 | -1.91015 |
| Lage3        | NM_025410    | 0.006635 | -5.17362 | 5.66112 | 6.5956  | 0.523231 | -0.93448 | -1.9112  |
| Irak1bp1     | NM_022986    | 0.000223 | -12.6839 | 6.41414 | 7.34867 | 0.523211 | -0.93454 | -1.91128 |
|              | ---          | 0.006733 | -5.15236 | 2.45453 | 3.39089 | 0.522552 | -0.93635 | -1.91369 |
| LOC100039753 | NM_001017394 | 0.003039 | -6.41267 | 3.53361 | 4.47059 | 0.522325 | -0.93698 | -1.91452 |
| Galnt13      | NM_173030    | 0.006182 | -5.27724 | 3.14241 | 4.07967 | 0.522223 | -0.93726 | -1.91489 |
| Rps12        | NM_011295    | 0.006181 | -5.27752 | 10.4682 | 11.4073 | 0.521561 | -0.93909 | -1.91732 |
| Chchd10      | NM_175329    | 0.00595  | -5.33369 | 5.32786 | 6.26764 | 0.521312 | -0.93978 | -1.91824 |
| Csrp1        | NM_007791    | 9.65E-06 | -28.0189 | 9.91863 | 10.8597 | 0.520863 | -0.94102 | -1.91989 |
| Ssr4         | NM_001166480 | 0.000738 | -9.3197  | 8.72414 | 9.66658 | 0.520352 | -0.94244 | -1.92178 |
| Fam38a       | NM_001037298 | 0.002685 | -6.6298  | 7.75287 | 8.69557 | 0.520259 | -0.9427  | -1.92212 |
| Pacs1        | NM_153129    | 0.000166 | -13.6568 | 5.48626 | 6.42953 | 0.520055 | -0.94326 | -1.92287 |
| Ank2         | NM_178655    | 0.000561 | -10.0051 | 5.99785 | 6.94137 | 0.519961 | -0.94352 | -1.92322 |

|               |              |          |          |         |         |          |          |          |
|---------------|--------------|----------|----------|---------|---------|----------|----------|----------|
| Rsph9         | NM_029338    | 0.003429 | -6.20644 | 4.65355 | 5.59798 | 0.519636 | -0.94443 | -1.92442 |
| Lancl3        | NM_173414    | 0.002403 | -6.83039 | 4.45503 | 5.39991 | 0.519475 | -0.94487 | -1.92502 |
| Il17ra        | NM_008359    | 0.001531 | -7.69897 | 7.36517 | 8.31089 | 0.519173 | -0.94571 | -1.92614 |
| Fam55d        | BC094249     | 0.000872 | -8.92451 | 5.95595 | 6.9018  | 0.519125 | -0.94585 | -1.92632 |
| Cnrip1        | NM_029861    | 0.001584 | -7.63091 | 5.76574 | 6.71273 | 0.518716 | -0.94698 | -1.92784 |
| Nr1h3         | NM_013839    | 0.006736 | -5.15176 | 4.7875  | 5.73731 | 0.517698 | -0.94982 | -1.93163 |
| Galt          | NM_016658    | 0.002281 | -6.92604 | 5.92514 | 6.87549 | 0.517507 | -0.95035 | -1.93234 |
| Rilpl2        | NM_030259    | 0.004744 | -5.67923 | 5.40227 | 6.35283 | 0.51743  | -0.95057 | -1.93263 |
| S1pr2         | NM_010333    | 0.000517 | -10.2182 | 6.70884 | 7.66136 | 0.516731 | -0.95252 | -1.93524 |
| Gabre         | NM_017369    | 0.003776 | -6.04555 | 3.38973 | 4.34306 | 0.516438 | -0.95333 | -1.93634 |
| Nus1          | NM_030250    | 0.000615 | -9.76798 | 8.84996 | 9.80345 | 0.516382 | -0.95349 | -1.93655 |
| Nagk          | NM_019542    | 0.005806 | -5.37042 | 6.93618 | 7.89004 | 0.516252 | -0.95385 | -1.93704 |
| Eif1b         | NM_026892    | 0.006777 | -5.14297 | 7.09065 | 8.04504 | 0.516056 | -0.9544  | -1.93777 |
| Nlr1          | NM_178420    | 0.001448 | -7.81336 | 5.47464 | 6.43494 | 0.513951 | -0.9603  | -1.94571 |
| Palld         | NM_001081390 | 0.003132 | -6.36055 | 6.48804 | 7.44986 | 0.513408 | -0.96182 | -1.94777 |
| Igsf3         | NM_207205    | 0.004294 | -5.83707 | 6.56438 | 7.52717 | 0.513065 | -0.96279 | -1.94907 |
| 9930014A18Rik | NR_030696    | 0.002437 | -6.80466 | 5.56588 | 6.52894 | 0.512967 | -0.96306 | -1.94944 |
| D030025P21Rik | NR_028577    | 0.001642 | -7.55893 | 4.61977 | 5.58322 | 0.512828 | -0.96345 | -1.94997 |
| Yipf5         | NM_023311    | 0.000442 | -10.639  | 8.72223 | 9.68665 | 0.512488 | -0.96441 | -1.95127 |
| Sra1          | NM_025291    | 0.000558 | -10.0203 | 7.9275  | 8.89275 | 0.51219  | -0.96525 | -1.9524  |
| Trp53         | NM_001127233 | 0.002867 | -6.51413 | 7.32209 | 8.28776 | 0.512041 | -0.96567 | -1.95297 |
| Add3          | NM_001164099 | 0.000303 | -11.7187 | 7.95825 | 8.92473 | 0.511753 | -0.96648 | -1.95407 |
| Mycbp2        | NM_207215    | 0.001567 | -7.65274 | 7.1247  | 8.0924  | 0.51132  | -0.9677  | -1.95572 |
| Arid5b        | NM_023598    | 0.000857 | -8.96456 | 8.6256  | 9.59348 | 0.511256 | -0.96788 | -1.95597 |
| Ifnar2        | NM_010509    | 0.002194 | -6.99857 | 7.74765 | 8.71895 | 0.510049 | -0.97129 | -1.9606  |
| Sh3bp1        | NM_009164    | 0.000402 | -10.9026 | 5.76082 | 6.73214 | 0.51004  | -0.97132 | -1.96063 |
| Gdf1          | NM_001163282 | 0.002348 | -6.87305 | 5.62287 | 6.59536 | 0.509625 | -0.97249 | -1.96223 |
| Gmppb         | NM_177910    | 0.004717 | -5.68816 | 5.39448 | 6.36711 | 0.509577 | -0.97263 | -1.96241 |
| Cdh18         | NM_001081299 | 0.002227 | -6.97031 | 4.10351 | 5.07637 | 0.509494 | -0.97286 | -1.96273 |
| Osgep         | NM_133676    | 0.000746 | -9.29209 | 6.94666 | 7.92118 | 0.508907 | -0.97453 | -1.96499 |
| ---           | ---          | 0.002683 | -6.63106 | 4.58499 | 5.56143 | 0.508231 | -0.97644 | -1.96761 |

|              |              |          |          |         |         |          |          |          |
|--------------|--------------|----------|----------|---------|---------|----------|----------|----------|
| Bbox1        | NM_130452    | 0.000617 | -9.76327 | 3.53471 | 4.51245 | 0.507773 | -0.97774 | -1.96938 |
| Gng10        | NM_025277    | 0.004114 | -5.90566 | 7.87324 | 8.85134 | 0.507648 | -0.9781  | -1.96987 |
| Fzd8         | NM_008058    | 0.000246 | -12.3598 | 6.36923 | 7.34742 | 0.507616 | -0.97819 | -1.96999 |
| Dnm3os       | NR_002870    | 0.000655 | -9.61313 | 5.90076 | 6.87964 | 0.507375 | -0.97888 | -1.97093 |
| Rab9         | NM_019773    | 0.004605 | -5.72599 | 6.53874 | 7.51787 | 0.507284 | -0.97913 | -1.97128 |
| Myd88        | NM_010851    | 0.001587 | -7.62655 | 7.82579 | 8.80655 | 0.506713 | -0.98076 | -1.9735  |
| Dnajc27      | NM_153082    | 0.001582 | -7.63307 | 3.9217  | 4.90266 | 0.506641 | -0.98096 | -1.97378 |
| Hebp2        | NM_019487    | 0.000977 | -8.66177 | 5.46858 | 6.44966 | 0.506601 | -0.98108 | -1.97394 |
| Pkdcc        | NM_134117    | 0.006298 | -5.24987 | 5.38222 | 6.36367 | 0.506471 | -0.98145 | -1.97445 |
| Uhrf2        | NM_144873    | 0.00152  | -7.71412 | 8.43358 | 9.41695 | 0.505797 | -0.98337 | -1.97708 |
| Hnrnp3       | NM_001079824 | 9.75E-05 | -15.6457 | 7.46945 | 8.4529  | 0.505767 | -0.98346 | -1.9772  |
|              | ---          | 0.000892 | -8.86997 | 3.10076 | 4.08444 | 0.505689 | -0.98368 | -1.9775  |
|              | ---          | 0.00117  | -8.26445 | 4.63412 | 5.61996 | 0.504931 | -0.98584 | -1.98047 |
| Rpl11        | NM_025919    | 0.004647 | -5.71159 | 10.4281 | 11.4177 | 0.503624 | -0.98958 | -1.98561 |
| Arl5b        | NM_029466    | 0.002723 | -6.60487 | 7.01395 | 8.00405 | 0.503444 | -0.9901  | -1.98632 |
| LOC100039753 | NM_001017394 | 0.001113 | -8.37238 | 3.61343 | 4.60382 | 0.503341 | -0.99039 | -1.98673 |
| Rps2         | NM_008503    | 0.000151 | -14.0007 | 9.94864 | 10.9394 | 0.503207 | -0.99078 | -1.98725 |
| Cog3         | NM_177381    | 0.000741 | -9.3097  | 7.37341 | 8.36509 | 0.502891 | -0.99168 | -1.9885  |
|              | ---          | 0.005979 | -5.32661 | 10.0595 | 11.0513 | 0.502862 | -0.99176 | -1.98862 |
| Gdf10        | NM_145741    | 0.006018 | -5.31692 | 5.55628 | 6.5486  | 0.502669 | -0.99232 | -1.98938 |
| Dchs1        | NM_001162943 | 0.004803 | -5.65999 | 4.64949 | 5.64372 | 0.502003 | -0.99423 | -1.99202 |
| Mapk13       | NM_011950    | 0.000765 | -9.23134 | 5.33472 | 6.32959 | 0.501781 | -0.99487 | -1.9929  |
| Nit2         | NM_023175    | 0.002633 | -6.66494 | 6.60578 | 7.60104 | 0.501643 | -0.99527 | -1.99345 |
| Mfsd9        | NM_172499    | 0.000855 | -8.97041 | 4.95118 | 5.94953 | 0.500574 | -0.99834 | -1.99771 |
| Litaf        | NM_019980    | 0.003076 | -6.39167 | 8.46206 | 9.4611  | 0.500335 | -0.99903 | -1.99866 |
| Rplp1        | BC091747     | 0.000148 | -14.0798 | 9.65349 | 10.6528 | 0.500257 | -0.99926 | -1.99897 |
| Ifitm2       | NM_030694    | 0.004087 | -5.91653 | 10.1341 | 11.1334 | 0.500251 | -0.99928 | -1.999   |
| Papd4        | NM_133905    | 2.78E-05 | -21.4796 | 7.8928  | 8.89352 | 0.499748 | -1.00073 | -2.00101 |
| Pdia5        | NM_028295    | 0.000318 | -11.5809 | 7.79895 | 8.8002  | 0.499566 | -1.00125 | -2.00174 |
| Arl5c        | NM_207231    | 0.002541 | -6.72883 | 4.9993  | 6.00235 | 0.498943 | -1.00305 | -2.00424 |
|              | ---          | 0.002462 | -6.78642 | 5.83862 | 6.84287 | 0.498529 | -1.00425 | -2.0059  |

|               |              |          |          |         |         |          |          |          |
|---------------|--------------|----------|----------|---------|---------|----------|----------|----------|
| Adck4         | NM_133770    | 0.002561 | -6.71462 | 6.86778 | 7.87331 | 0.498089 | -1.00552 | -2.00767 |
| Gspt2         | NM_008179    | 0.002687 | -6.62856 | 3.89096 | 4.89683 | 0.497972 | -1.00586 | -2.00814 |
| Oat           | NM_016978    | 0.000143 | -14.1867 | 9.49681 | 10.5032 | 0.497786 | -1.0064  | -2.0089  |
| 2810405K02Rik | BC030453     | 0.000444 | -10.629  | 4.68597 | 5.69287 | 0.497614 | -1.0069  | -2.00959 |
| Gnpda2        | NM_001038015 | 0.00128  | -8.0716  | 6.40739 | 7.41569 | 0.497133 | -1.0083  | -2.01154 |
|               | ---          | 0.002939 | -6.47043 | 2.72025 | 3.72932 | 0.496867 | -1.00907 | -2.01261 |
| Spin4         | NM_178753    | 0.000532 | -10.1441 | 5.86468 | 6.87634 | 0.495977 | -1.01165 | -2.01622 |
| P4htm         | NM_028944    | 0.002105 | -7.07618 | 5.13185 | 6.14388 | 0.49585  | -1.01203 | -2.01674 |
| Ddhd1         | NM_001042719 | 6.61E-06 | -30.813  | 7.66952 | 8.68366 | 0.495124 | -1.01414 | -2.0197  |
|               | ---          | 0.005556 | -5.4364  | 7.94349 | 8.95809 | 0.494967 | -1.0146  | -2.02034 |
| Rcbtb2        | NM_001170694 | 0.000645 | -9.64953 | 6.66975 | 7.68497 | 0.494753 | -1.01522 | -2.02121 |
| Capn1         | NM_007600    | 4.39E-06 | -34.1385 | 7.83994 | 8.85527 | 0.494715 | -1.01533 | -2.02137 |
| Zfp874a       | NM_177712    | 0.002791 | -6.56105 | 4.48449 | 5.50205 | 0.49395  | -1.01756 | -2.0245  |
| Rpia          | NM_009075    | 7.09E-05 | -16.9588 | 5.4804  | 6.4995  | 0.493423 | -1.0191  | -2.02666 |
| Riok3         | NM_024182    | 4.51E-05 | -19.0082 | 7.88516 | 8.90609 | 0.492802 | -1.02092 | -2.02921 |
| Dzip1         | NM_025943    | 0.001149 | -8.30391 | 5.26611 | 6.28874 | 0.492218 | -1.02263 | -2.03162 |
| Spry4         | NM_011898    | 0.003468 | -6.18713 | 5.3333  | 6.35938 | 0.491041 | -1.02609 | -2.03649 |
|               | ---          | 0.002801 | -6.55479 | 4.00119 | 5.02895 | 0.490471 | -1.02776 | -2.03886 |
| LOC100039753  | NM_001017394 | 0.001861 | -7.31142 | 3.77574 | 4.80402 | 0.490293 | -1.02828 | -2.0396  |
| BC013529      | NM_145418    | 0.0014   | -7.88261 | 7.62926 | 8.65905 | 0.489781 | -1.02979 | -2.04173 |
| Rgl3          | NM_023622    | 0.000465 | -10.5028 | 4.90279 | 5.93316 | 0.489584 | -1.03037 | -2.04255 |
| 1110032A13Rik | NM_199197    | 0.000138 | -14.324  | 6.16477 | 7.19658 | 0.489097 | -1.03181 | -2.04458 |
| Ank3          | NM_146005    | 0.000948 | -8.73153 | 5.91892 | 6.95141 | 0.488868 | -1.03248 | -2.04554 |
| B3galnt2      | NM_178640    | 0.003576 | -6.13599 | 7.86163 | 8.89661 | 0.488025 | -1.03497 | -2.04907 |
| Gas5          | NR_002840    | 0.001152 | -8.29732 | 9.63288 | 10.6689 | 0.487661 | -1.03605 | -2.05061 |
| Chst11        | NM_021439    | 0.004988 | -5.60118 | 7.58617 | 8.62535 | 0.486605 | -1.03918 | -2.05506 |
| Tmem38b       | NM_028053    | 0.002165 | -7.02326 | 5.11303 | 6.15346 | 0.48618  | -1.04044 | -2.05685 |
|               | ---          | 0.005734 | -5.38906 | 4.54087 | 5.5823  | 0.485848 | -1.04142 | -2.05826 |
| Spry3         | NM_001030293 | 0.004959 | -5.61025 | 3.75696 | 4.79862 | 0.485767 | -1.04166 | -2.0586  |
| Tmem159       | NM_145586    | 0.002454 | -6.79165 | 7.32051 | 8.3628  | 0.485556 | -1.04229 | -2.0595  |
| Cpne8         | NM_025815    | 0.007038 | -5.0887  | 6.11114 | 7.154   | 0.485364 | -1.04286 | -2.06031 |

|               |              |          |          |         |         |          |          |          |
|---------------|--------------|----------|----------|---------|---------|----------|----------|----------|
| Cpa6          | NM_177834    | 7.77E-05 | -16.5723 | 3.41407 | 4.45719 | 0.485274 | -1.04313 | -2.06069 |
| Prdx4         | NM_016764    | 0.000379 | -11.0695 | 7.9263  | 8.97077 | 0.484823 | -1.04447 | -2.06261 |
| Tmem205       | NM_178577    | 0.000795 | -9.1395  | 6.68185 | 7.72883 | 0.483979 | -1.04698 | -2.06621 |
|               | ---          | 0.004427 | -5.78823 | 3.20428 | 4.25177 | 0.483812 | -1.04748 | -2.06692 |
| Sh3bgrl3      | NM_080559    | 0.001044 | -8.51493 | 8.70582 | 9.75467 | 0.483352 | -1.04885 | -2.06888 |
| Adora2b       | NM_007413    | 0.000586 | -9.89287 | 5.61706 | 6.66709 | 0.482958 | -1.05003 | -2.07057 |
| Fam38a        | NM_001037298 | 0.002568 | -6.70964 | 7.63749 | 8.68781 | 0.482863 | -1.05031 | -2.07098 |
| Rps19         | NM_023133    | 0.006504 | -5.20282 | 7.56623 | 8.61677 | 0.482789 | -1.05053 | -2.0713  |
| Rps19         | NM_023133    | 0.006504 | -5.20282 | 7.56623 | 8.61677 | 0.482789 | -1.05053 | -2.0713  |
| Rps27l        | NM_026467    | 0.001846 | -7.32737 | 7.60098 | 8.65352 | 0.482117 | -1.05255 | -2.07419 |
| Zfp354c       | NM_013922    | 0.002717 | -6.60902 | 7.0805  | 8.13557 | 0.481273 | -1.05507 | -2.07782 |
| Stat5a        | NM_011488    | 0.004599 | -5.72812 | 6.09014 | 7.1457  | 0.481109 | -1.05556 | -2.07853 |
| Slc9a9        | NM_177909    | 4.74E-06 | -33.4891 | 6.55761 | 7.61351 | 0.480997 | -1.0559  | -2.07901 |
| Gaa           | NM_008064    | 0.005122 | -5.5603  | 8.96874 | 10.025  | 0.480877 | -1.05626 | -2.07953 |
| Slc7a7        | NM_011405    | 0.004971 | -5.60671 | 4.67144 | 5.72841 | 0.480641 | -1.05697 | -2.08055 |
| A430110N23Rik | NM_173008    | 0.001257 | -8.10907 | 6.95611 | 8.01372 | 0.480425 | -1.05762 | -2.08149 |
| Rexo2         | NM_024233    | 0.000148 | -14.0711 | 9.00714 | 10.0648 | 0.480423 | -1.05762 | -2.0815  |
|               | ---          | 0.003902 | -5.99198 | 8.31825 | 9.37599 | 0.480385 | -1.05774 | -2.08166 |
| Arsb          | NM_009712    | 0.005318 | -5.50293 | 7.72698 | 8.78498 | 0.480296 | -1.058   | -2.08205 |
| Maf           | NM_001025577 | 0.000447 | -10.6052 | 6.93366 | 7.99416 | 0.479464 | -1.06051 | -2.08566 |
| Fuca1         | NM_024243    | 0.00694  | -5.1088  | 8.03371 | 9.09618 | 0.47881  | -1.06248 | -2.08851 |
| Alkbh2        | NM_175016    | 0.005167 | -5.5471  | 5.7054  | 6.76834 | 0.478656 | -1.06294 | -2.08918 |
| Rev3l         | NM_011264    | 0.000649 | -9.63536 | 7.75874 | 8.82466 | 0.477668 | -1.06592 | -2.0935  |
|               | ---          | 0.003004 | -6.43237 | 3.62718 | 4.6932  | 0.477634 | -1.06602 | -2.09365 |
| Eefsec        | NM_023060    | 0.005582 | -5.42932 | 6.59707 | 7.66364 | 0.477456 | -1.06656 | -2.09444 |
| Zeb1          | NM_011546    | 0.000701 | -9.44504 | 8.25601 | 9.32269 | 0.477416 | -1.06668 | -2.09461 |
| Ifitm2        | NM_030694    | 0.004175 | -5.88208 | 9.69935 | 10.7679 | 0.476812 | -1.06851 | -2.09726 |
| Trmt61a       | NM_177374    | 0.001369 | -7.93013 | 5.75021 | 6.81958 | 0.476529 | -1.06936 | -2.09851 |
| Wipf1         | NM_153138    | 0.000154 | -13.9251 | 5.80628 | 6.87598 | 0.476418 | -1.0697  | -2.099   |
| Tgfr1         | NM_009370    | 0.000165 | -13.6915 | 8.15416 | 9.22531 | 0.47594  | -1.07115 | -2.1011  |
| Gpr88         | NM_022427    | 0.001485 | -7.76238 | 5.45815 | 6.52956 | 0.475854 | -1.07141 | -2.10149 |

|               |              |          |          |         |         |          |          |          |
|---------------|--------------|----------|----------|---------|---------|----------|----------|----------|
| 9030617O03Rik | BC066161     | 0.000822 | -9.06254 | 4.99075 | 6.06852 | 0.473762 | -1.07777 | -2.11076 |
| Bmpr1b        | NM_007560    | 2.03E-06 | -41.4476 | 3.77498 | 4.85435 | 0.473235 | -1.07937 | -2.11312 |
| Fcgrt         | NM_010189    | 0.002237 | -6.96224 | 9.27295 | 10.3528 | 0.473074 | -1.07986 | -2.11383 |
| LOC100039147  | XM_003085637 | 0.001026 | -8.55259 | 3.92529 | 5.00545 | 0.472975 | -1.08016 | -2.11428 |
| Cask          | NM_009806    | 0.00456  | -5.74141 | 8.05131 | 9.13268 | 0.472581 | -1.08137 | -2.11604 |
| Zim1          | NM_011769    | 0.006351 | -5.2376  | 3.77478 | 4.8563  | 0.472532 | -1.08152 | -2.11626 |
| Tspan4        | NM_053082    | 8.79E-05 | -16.0597 | 9.26213 | 10.3448 | 0.472162 | -1.08265 | -2.11792 |
| Gpc4          | NM_008150    | 0.000251 | -12.2991 | 8.01274 | 9.09599 | 0.471963 | -1.08325 | -2.11881 |
| Vaultrc5      | NR_027885    | 0.001607 | -7.60172 | 5.58105 | 6.66513 | 0.471694 | -1.08408 | -2.12002 |
| Leprot        | NM_175036    | 0.000128 | -14.5901 | 7.63753 | 8.72216 | 0.471512 | -1.08463 | -2.12084 |
| Sema6a        | NM_018744    | 0.000885 | -8.8886  | 4.74068 | 5.82664 | 0.471078 | -1.08596 | -2.12279 |
| Zfpm2         | NM_011766    | 0.004058 | -5.928   | 5.60542 | 6.69327 | 0.470461 | -1.08785 | -2.12558 |
| Cish          | NM_009895    | 0.004046 | -5.93261 | 4.97859 | 6.06683 | 0.470337 | -1.08823 | -2.12613 |
| Chst12        | NM_021528    | 0.002437 | -6.80445 | 8.22691 | 9.3159  | 0.470092 | -1.08899 | -2.12724 |
| Tifa          | NM_145133    | 0.0035   | -6.17185 | 6.72728 | 7.81809 | 0.469498 | -1.09081 | -2.12994 |
| Prorsd1       | NM_001163454 | 0.001247 | -8.12662 | 5.89803 | 6.99011 | 0.469084 | -1.09208 | -2.13182 |
| Gnpnat1       | NM_019425    | 0.00035  | -11.2964 | 7.33473 | 8.42684 | 0.469075 | -1.09211 | -2.13186 |
| Higd1a        | NM_019814    | 0.001607 | -7.60206 | 5.75702 | 6.85118 | 0.468408 | -1.09416 | -2.13489 |
| Kdelr3        | NM_134090    | 0.001409 | -7.86961 | 8.54438 | 9.63973 | 0.468021 | -1.09535 | -2.13665 |
| Mmp14         | NM_008608    | 0.000349 | -11.3049 | 10.952  | 12.0476 | 0.467932 | -1.09563 | -2.13706 |
| Mfsd10        | NM_026660    | 0.000149 | -14.0503 | 7.84753 | 8.94423 | 0.467582 | -1.09671 | -2.13866 |
| Lrp1          | NM_008512    | 0.00042  | -10.7777 | 10.2086 | 11.3054 | 0.467526 | -1.09688 | -2.13892 |
| Dsel          | NM_001081316 | 0.002805 | -6.55222 | 6.72983 | 7.82756 | 0.467253 | -1.09772 | -2.14017 |
|               | ---          | 0.003755 | -6.05495 | 3.6929  | 4.79334 | 0.466372 | -1.10045 | -2.14421 |
| Rpl11         | NM_025919    | 0.002629 | -6.66786 | 9.96143 | 11.0627 | 0.466112 | -1.10125 | -2.14541 |
| Fhl2          | NM_010212    | 0.001964 | -7.20755 | 6.24542 | 7.34697 | 0.466017 | -1.10155 | -2.14584 |
|               | ---          | 0.000692 | -9.47756 | 5.23812 | 6.33988 | 0.465947 | -1.10176 | -2.14617 |
| Pkd2          | NM_008861    | 0.000445 | -10.6188 | 8.72667 | 9.82912 | 0.465723 | -1.10246 | -2.1472  |
|               | ---          | 0.00097  | -8.6792  | 5.25707 | 6.36108 | 0.46522  | -1.10401 | -2.14952 |
| Gm1973        | NM_029288    | 0.002071 | -7.10724 | 3.20873 | 4.31306 | 0.465117 | -1.10433 | -2.15    |
| Rbm47         | NM_178446    | 0.004358 | -5.81342 | 4.63179 | 5.73636 | 0.465041 | -1.10457 | -2.15035 |

|               |              |          |          |         |         |          |          |          |
|---------------|--------------|----------|----------|---------|---------|----------|----------|----------|
| Egfr          | NM_207655    | 0.000903 | -8.84254 | 8.66975 | 9.77558 | 0.464636 | -1.10583 | -2.15222 |
| Mettl7a1      | NM_027334    | 0.001931 | -7.24047 | 7.29385 | 8.39986 | 0.464577 | -1.10601 | -2.1525  |
| Wbp5          | NM_011712    | 8.15E-05 | -16.371  | 8.88711 | 9.99787 | 0.463049 | -1.11076 | -2.1596  |
| Rps12         | AF357393     | 0.001466 | -7.7882  | 6.06425 | 7.17527 | 0.462968 | -1.11102 | -2.15998 |
| 1500011K16Rik | NR_015476    | 0.000761 | -9.24349 | 5.74795 | 6.85916 | 0.462905 | -1.11121 | -2.16027 |
| Podxl2        | NM_176973    | 0.000821 | -9.06551 | 4.61516 | 5.72645 | 0.46288  | -1.11129 | -2.16038 |
| Frem1         | NM_177863    | 0.004945 | -5.61464 | 4.02472 | 5.1364  | 0.462755 | -1.11168 | -2.16097 |
| Pcdh7         | NM_018764    | 0.000544 | -10.0826 | 7.68276 | 8.79471 | 0.462666 | -1.11196 | -2.16139 |
| Lgals3bp      | NM_011150    | 0.001504 | -7.73584 | 8.9226  | 10.0386 | 0.461386 | -1.11595 | -2.16738 |
| S100a13       | NM_009113    | 0.000247 | -12.3548 | 6.10687 | 7.223   | 0.46133  | -1.11613 | -2.16765 |
| Tnfrsf1a      | NM_011609    | 0.000606 | -9.80767 | 9.242   | 10.3585 | 0.461226 | -1.11646 | -2.16814 |
| Rassf8        | NM_027760    | 3.66E-05 | -20.041  | 7.06977 | 8.19286 | 0.45911  | -1.12309 | -2.17813 |
| Armcx3        | NM_027870    | 0.000788 | -9.16128 | 9.49989 | 10.6232 | 0.459041 | -1.12331 | -2.17846 |
| Pcdhga12      | NM_033595    | 3.52E-05 | -20.2309 | 5.39835 | 6.52211 | 0.458899 | -1.12375 | -2.17913 |
| Rgma          | NM_177740    | 0.001559 | -7.66313 | 6.82886 | 7.95384 | 0.458508 | -1.12498 | -2.18099 |
| Hif1a         | NM_010431    | 0.000257 | -12.2246 | 8.97993 | 10.1055 | 0.458313 | -1.1256  | -2.18192 |
| Pappa2        | NM_001085376 | 0.005633 | -5.41569 | 4.30351 | 5.42932 | 0.458247 | -1.1258  | -2.18223 |
|               | ---          | 0.00068  | -9.51839 | 6.72402 | 7.85062 | 0.457994 | -1.1266  | -2.18344 |
| Gnpnat1       | NM_019425    | 0.000292 | -11.8332 | 7.04328 | 8.1738  | 0.456754 | -1.13051 | -2.18936 |
| Ptp4a3        | NM_008975    | 0.000604 | -9.81683 | 5.72038 | 6.85213 | 0.456362 | -1.13175 | -2.19124 |
| Trim30d       | NM_199146    | 0.004612 | -5.72353 | 4.38402 | 5.51582 | 0.456348 | -1.13179 | -2.19131 |
| Ldoc1l        | NM_177630    | 0.00201  | -7.16321 | 4.61477 | 5.74946 | 0.455434 | -1.13468 | -2.19571 |
| Adcy9         | NM_009624    | 0.001504 | -7.73546 | 4.6877  | 5.82627 | 0.454209 | -1.13857 | -2.20163 |
| Psen2         | NM_011183    | 0.000224 | -12.6613 | 6.27866 | 7.41781 | 0.454027 | -1.13915 | -2.20251 |
| Armcx3        | NM_027870    | 0.000539 | -10.1097 | 9.03518 | 10.1765 | 0.453338 | -1.14134 | -2.20586 |
| Il7           | NM_008371    | 0.000577 | -9.93133 | 3.2943  | 4.43962 | 0.452091 | -1.14531 | -2.21194 |
| Marcks        | NM_008538    | 0.001501 | -7.73936 | 9.45469 | 10.6006 | 0.451918 | -1.14587 | -2.21279 |
| Gla           | NM_013463    | 0.001106 | -8.38624 | 8.31883 | 9.46495 | 0.451838 | -1.14612 | -2.21318 |
| Reck          | NM_016678    | 0.000258 | -12.2083 | 6.90529 | 8.0525  | 0.451496 | -1.14722 | -2.21486 |
| Clybl         | NM_029556    | 0.000431 | -10.7081 | 6.87749 | 8.02578 | 0.45116  | -1.14829 | -2.21651 |
| Ifitm1        | NM_026820    | 0.004207 | -5.86995 | 5.32349 | 6.4722  | 0.451029 | -1.14871 | -2.21715 |



|               |              |          |          |         |         |          |          |          |
|---------------|--------------|----------|----------|---------|---------|----------|----------|----------|
| Tmem200a      | NM_029881    | 0.001947 | -7.22415 | 5.05616 | 6.20613 | 0.450634 | -1.14997 | -2.2191  |
| Ifih1         | NM_027835    | 0.002187 | -7.00449 | 3.91077 | 5.06123 | 0.450482 | -1.15046 | -2.21984 |
| Ahi1          | NM_026203    | 0.000984 | -8.64773 | 6.40873 | 7.56048 | 0.450077 | -1.15175 | -2.22184 |
| Mir541        | NR_030263    | 0.002221 | -6.97565 | 3.1695  | 4.32152 | 0.449996 | -1.15202 | -2.22224 |
| Fam69b        | NM_019833    | 0.000949 | -8.72781 | 5.59918 | 6.75264 | 0.449545 | -1.15346 | -2.22447 |
| D830030K20Rik | NM_177135    | 0.002953 | -6.46208 | 3.1852  | 4.34117 | 0.448763 | -1.15598 | -2.22835 |
| Satb1         | NM_009122    | 0.005445 | -5.46706 | 4.16037 | 5.31791 | 0.448277 | -1.15754 | -2.23076 |
| Gypc          | NM_001048207 | 0.000352 | -11.2823 | 6.64398 | 7.80237 | 0.448013 | -1.15839 | -2.23208 |
| Hoxb6         | NM_008269    | 0.004294 | -5.8369  | 6.55854 | 7.72388 | 0.445859 | -1.16534 | -2.24286 |
| Atp2b4        | NM_001167949 | 0.000397 | -10.9398 | 4.54471 | 5.7137  | 0.444731 | -1.169   | -2.24855 |
| Armcx3        | NM_027870    | 0.001762 | -7.41814 | 8.7583  | 9.92769 | 0.444612 | -1.16938 | -2.24915 |
| Foxg1         | NM_008241    | 0.001857 | -7.31636 | 5.82378 | 6.9972  | 0.443368 | -1.17342 | -2.25546 |
| Thoc1         | NM_153552    | 0.005377 | -5.48597 | 6.97616 | 8.15046 | 0.443101 | -1.17429 | -2.25682 |
| B4galt4       | NM_019804    | 0.00661  | -5.17914 | 4.69825 | 5.87273 | 0.443042 | -1.17449 | -2.25712 |
| Gas5          | NR_002840    | 0.000739 | -9.31641 | 8.25145 | 9.4274  | 0.442591 | -1.17595 | -2.25942 |
| Trpc6         | NM_013838    | 8.98E-05 | -15.9737 | 4.19506 | 5.37216 | 0.442238 | -1.1771  | -2.26122 |
| Crispld2      | NM_030209    | 0.002231 | -6.96715 | 5.18247 | 6.36103 | 0.441791 | -1.17856 | -2.26351 |
| Nfix          | NM_001081981 | 4.97E-05 | -18.5495 | 9.06817 | 10.2469 | 0.441746 | -1.17871 | -2.26375 |
| Dclk1         | NM_019978    | 0.000443 | -10.6306 | 7.32509 | 8.50485 | 0.441426 | -1.17976 | -2.26539 |
| Rnf122        | NM_175136    | 0.003821 | -6.02602 | 6.64483 | 7.82565 | 0.441102 | -1.18082 | -2.26705 |
| Msrb2         | NM_029619    | 0.000264 | -12.1399 | 4.76689 | 5.94955 | 0.440536 | -1.18267 | -2.26996 |
| Glrx          | NM_053108    | 0.000653 | -9.61877 | 6.56207 | 7.74608 | 0.440127 | -1.18401 | -2.27207 |
| Gm7265        | AK087684     | 0.003711 | -6.07455 | 4.81483 | 5.99955 | 0.43991  | -1.18472 | -2.27319 |
| Dpep1         | NM_007876    | 0.000282 | -11.935  | 4.37467 | 5.56141 | 0.439295 | -1.18674 | -2.27638 |
| Shisa5        | NM_025858    | 0.00023  | -12.5754 | 8.77956 | 9.96795 | 0.438794 | -1.18838 | -2.27897 |
| Mcart1        | NM_001009949 | 0.000114 | -15.0317 | 6.83635 | 8.02912 | 0.43746  | -1.19278 | -2.28592 |
| Mfsd7a        | NM_172883    | 0.000203 | -12.9861 | 5.32704 | 6.52064 | 0.43721  | -1.1936  | -2.28723 |
| Ptger4        | NM_001136079 | 0.000176 | -13.4685 | 6.82761 | 8.02183 | 0.437023 | -1.19422 | -2.28821 |
| Lepre1        | NM_019783    | 0.000485 | -10.3866 | 7.05295 | 8.24797 | 0.436781 | -1.19502 | -2.28947 |
| Slc44a2       | NM_152808    | 0.000493 | -10.3423 | 8.04938 | 9.24597 | 0.436306 | -1.19659 | -2.29197 |
| Bscl2         | NM_008144    | 0.000686 | -9.49617 | 6.16462 | 7.36539 | 0.435042 | -1.20077 | -2.29863 |

|               |              |          |          |         |         |          |          |          |
|---------------|--------------|----------|----------|---------|---------|----------|----------|----------|
| Cacna1c       | NM_001159533 | 0.000341 | -11.3755 | 5.80646 | 7.00791 | 0.434837 | -1.20145 | -2.29971 |
| Papd4         | NM_133905    | 0.000369 | -11.1426 | 7.49582 | 8.69829 | 0.43453  | -1.20247 | -2.30134 |
| H2-T24        | NM_008207    | 0.0015   | -7.74118 | 4.84752 | 6.0576  | 0.432245 | -1.21008 | -2.3135  |
| Mum11l        | NM_001164630 | 0.001654 | -7.54331 | 4.46563 | 5.67619 | 0.432103 | -1.21055 | -2.31426 |
| Lclat1        | NM_001081071 | 0.000606 | -9.80781 | 8.00133 | 9.21347 | 0.431629 | -1.21214 | -2.31681 |
| 5730469M10Rik | BC056635     | 0.00199  | -7.18281 | 6.39549 | 7.60875 | 0.431293 | -1.21326 | -2.31861 |
| Zfp583        | NM_001033249 | 0.000314 | -11.6146 | 3.6512  | 4.86582 | 0.430887 | -1.21462 | -2.32079 |
| Rarres1       | NM_001164763 | 0.003672 | -6.09191 | 3.65211 | 4.86854 | 0.430346 | -1.21643 | -2.32371 |
| Rps19         | NM_023133    | 0.00162  | -7.58482 | 8.53885 | 9.7572  | 0.429775 | -1.21835 | -2.3268  |
| Txnip         | NM_001009935 | 0.007011 | -5.09415 | 9.30952 | 10.528  | 0.429721 | -1.21853 | -2.32709 |
| Setmar        | NM_178391    | 0.005112 | -5.56328 | 3.8834  | 5.10406 | 0.429085 | -1.22066 | -2.33054 |
| Dtd1          | NM_025314    | 0.000819 | -9.07041 | 5.36385 | 6.58499 | 0.428944 | -1.22114 | -2.33131 |
| Sec23a        | NM_009147    | 0.000341 | -11.3678 | 8.65496 | 9.87807 | 0.428357 | -1.22311 | -2.3345  |
| Fli1          | NM_008026    | 0.004312 | -5.83039 | 5.0189  | 6.24646 | 0.427041 | -1.22755 | -2.3417  |
| Rhou          | NM_133955    | 0.00029  | -11.8489 | 7.63678 | 8.86865 | 0.425764 | -1.23187 | -2.34872 |
| Arhgap31      | NM_020260    | 5.36E-05 | -18.2003 | 6.28177 | 7.51921 | 0.424126 | -1.23743 | -2.35779 |
| Nxn           | NM_008750    | 0.002038 | -7.13727 | 8.30873 | 9.55072 | 0.422789 | -1.24199 | -2.36525 |
| Ggt7          | NM_144786    | 0.000192 | -13.1654 | 5.10648 | 6.3491  | 0.422606 | -1.24262 | -2.36627 |
| Prickle2      | NM_001134461 | 0.004088 | -5.91622 | 5.87776 | 7.12267 | 0.421935 | -1.24491 | -2.37003 |
| Gap43         | NM_008083    | 0.000427 | -10.7329 | 4.35013 | 5.59843 | 0.420942 | -1.2483  | -2.37562 |
| Map3k5        | NM_008580    | 0.001246 | -8.12777 | 4.46942 | 5.71775 | 0.420934 | -1.24833 | -2.37567 |
| Pbx1          | NM_183355    | 0.000408 | -10.8613 | 7.90886 | 9.15792 | 0.420723 | -1.24906 | -2.37686 |
| Ptgir         | NM_008967    | 0.002183 | -7.0076  | 4.83815 | 6.08844 | 0.420364 | -1.25029 | -2.37889 |
| Mtus1         | NM_001005863 | 6.06E-06 | -31.4862 | 5.37503 | 6.62658 | 0.419998 | -1.25154 | -2.38096 |
| Crispld1      | NM_031402    | 3.76E-05 | -19.8969 | 4.36812 | 5.62    | 0.4199   | -1.25188 | -2.38152 |
|               | 3-Mar        |          |          |         |         |          |          |          |
|               | NM_177115    | 0.006422 | -5.22116 | 6.23962 | 7.49223 | 0.419691 | -1.2526  | -2.38271 |
| Fam13c        | NM_024244    | 0.000865 | -8.94224 | 4.66932 | 5.92284 | 0.419424 | -1.25352 | -2.38422 |
| Ptplad1       | NM_021345    | 0.000846 | -8.99394 | 7.88077 | 9.13493 | 0.419238 | -1.25416 | -2.38528 |
| Crtap         | NM_019922    | 7.81E-05 | -16.5467 | 8.23175 | 9.48694 | 0.418937 | -1.2552  | -2.38699 |
| Cd63          | NM_001042580 | 0.005475 | -5.45865 | 9.4529  | 10.7088 | 0.418723 | -1.25593 | -2.38822 |
| Gm5458        | NM_001024706 | 1.85E-06 | -42.3855 | 4.29097 | 5.54772 | 0.418485 | -1.25675 | -2.38957 |

|               |              |          |          |         |         |          |          |          |
|---------------|--------------|----------|----------|---------|---------|----------|----------|----------|
| Samd5         | NM_177271    | 0.001426 | -7.84543 | 6.13545 | 7.39703 | 0.417087 | -1.26158 | -2.39758 |
| Ick           | NM_019987    | 2.38E-06 | -39.8154 | 7.29072 | 8.55274 | 0.416959 | -1.26202 | -2.39832 |
| Dnajc12       | NM_013888    | 0.000251 | -12.2982 | 4.97619 | 6.23931 | 0.416642 | -1.26312 | -2.40014 |
| Slc35d2       | NM_001001321 | 0.002611 | -6.67974 | 3.72934 | 4.99612 | 0.415586 | -1.26678 | -2.40624 |
| Basp1         | NM_027395    | 0.000121 | -14.8086 | 6.08894 | 7.35592 | 0.415529 | -1.26698 | -2.40657 |
| Igfbp3        | NM_008343    | 0.004681 | -5.70039 | 6.03378 | 7.30357 | 0.414721 | -1.26979 | -2.41126 |
| Rftn1         | NM_181397    | 0.000801 | -9.12399 | 4.90107 | 6.17093 | 0.4147   | -1.26986 | -2.41138 |
| Ccng1         | NM_009831    | 0.001894 | -7.27804 | 9.43149 | 10.7015 | 0.414645 | -1.27005 | -2.4117  |
|               | ---          | 0.00089  | -8.87582 | 7.06651 | 8.33788 | 0.414268 | -1.27136 | -2.4139  |
| Galnt12       | NM_172693    | 0.001555 | -7.66791 | 4.42122 | 5.69348 | 0.414011 | -1.27226 | -2.41539 |
| Tacc1         | NM_177089    | 0.00014  | -14.2731 | 7.64247 | 8.91529 | 0.413851 | -1.27282 | -2.41633 |
| Apba1         | NM_177034    | 0.004177 | -5.88142 | 4.30677 | 5.58503 | 0.412292 | -1.27826 | -2.42547 |
| Gtdc1         | NM_172662    | 0.004326 | -5.82522 | 5.87909 | 7.16203 | 0.410957 | -1.28294 | -2.43334 |
| Tspyl4        | NM_030203    | 0.006876 | -5.12204 | 4.59599 | 5.88076 | 0.410434 | -1.28478 | -2.43644 |
| Stk40         | NM_001145827 | 0.001602 | -7.60813 | 6.20851 | 7.49578 | 0.409727 | -1.28727 | -2.44065 |
| 2510009E07Rik | NM_001001881 | 0.001213 | -8.18516 | 5.54088 | 6.83004 | 0.409188 | -1.28916 | -2.44386 |
| Ddr2          | NM_022563    | 0.000713 | -9.40168 | 9.14122 | 10.4316 | 0.40884  | -1.29039 | -2.44595 |
| Lass4         | NM_026058    | 0.000215 | -12.7959 | 6.88936 | 8.18024 | 0.408703 | -1.29088 | -2.44677 |
| Bnc2          | NM_172870    | 0.00198  | -7.19255 | 6.71859 | 8.01058 | 0.408386 | -1.29199 | -2.44866 |
| Ttc38         | NM_001033337 | 0.000394 | -10.9589 | 4.98992 | 6.28202 | 0.408354 | -1.29211 | -2.44885 |
| Zfp287        | NM_133208    | 0.001712 | -7.47592 | 3.9883  | 5.28193 | 0.407923 | -1.29363 | -2.45144 |
| Klf15         | NM_023184    | 0.003621 | -6.11506 | 5.68851 | 6.98363 | 0.407501 | -1.29512 | -2.45398 |
| Ifngr2        | NM_008338    | 0.000138 | -14.3252 | 8.41516 | 9.71051 | 0.407437 | -1.29535 | -2.45437 |
| Icam1         | NM_010493    | 0.001971 | -7.20081 | 5.52793 | 6.82396 | 0.407247 | -1.29602 | -2.45551 |
| Gria1         | NM_001113325 | 0.001869 | -7.30394 | 3.70858 | 5.00644 | 0.406729 | -1.29786 | -2.45864 |
| Ifitm3        | NM_025378    | 0.002186 | -7.00533 | 10.7893 | 12.0881 | 0.406455 | -1.29883 | -2.4603  |
| Trim47        | NM_172570    | 0.001801 | -7.37527 | 5.50655 | 6.80736 | 0.405899 | -1.30081 | -2.46366 |
| Gal3st4       | NM_001033416 | 0.006928 | -5.11124 | 3.46895 | 4.77677 | 0.40393  | -1.30782 | -2.47567 |
| Irx5          | NM_018826    | 0.005093 | -5.56915 | 5.82877 | 7.13781 | 0.40359  | -1.30904 | -2.47776 |
| Ahnak2        | AK138503     | 0.00059  | -9.87489 | 8.20359 | 9.51307 | 0.403468 | -1.30947 | -2.47851 |
| Klhl29        | NM_001164493 | 0.000806 | -9.10737 | 4.74288 | 6.05396 | 0.403016 | -1.31109 | -2.48129 |

|               |              |          |          |         |         |          |          |          |
|---------------|--------------|----------|----------|---------|---------|----------|----------|----------|
| Gabrb1        | NM_008069    | 0.000223 | -12.6714 | 3.47667 | 4.7889  | 0.402697 | -1.31223 | -2.48326 |
| Mir485        | NR_030253    | 0.003198 | -6.32444 | 4.69872 | 6.01371 | 0.401927 | -1.31499 | -2.48801 |
| Mn1           | NM_001081235 | 0.00045  | -10.5886 | 4.56427 | 5.89064 | 0.398769 | -1.32638 | -2.50772 |
| Mir487b       | NR_030271    | 0.006738 | -5.15131 | 4.08461 | 5.41124 | 0.398699 | -1.32663 | -2.50816 |
| Magee1        | NM_053201    | 1.00E-05 | -27.7735 | 6.27573 | 7.60669 | 0.397503 | -1.33096 | -2.5157  |
| Loxl4         | NM_001164311 | 0.002092 | -7.08811 | 3.72696 | 5.05929 | 0.397128 | -1.33233 | -2.51808 |
| Ugt1a9        | NM_201644    | 0.000157 | -13.863  | 6.62872 | 7.96195 | 0.396879 | -1.33323 | -2.51966 |
| B4gal5        | NM_019835    | 0.001484 | -7.76291 | 7.06156 | 8.39759 | 0.396109 | -1.33603 | -2.52456 |
| Tspan12       | NM_173007    | 0.000175 | -13.4768 | 3.72659 | 5.06314 | 0.395967 | -1.33655 | -2.52547 |
| Rhbd2         | NM_172572    | 0.001541 | -7.68642 | 4.81721 | 6.1539  | 0.395928 | -1.33669 | -2.52571 |
| Aldh9a1       | NM_019993    | 0.000254 | -12.2581 | 7.49721 | 8.83771 | 0.394884 | -1.3405  | -2.53239 |
| Cdkn1c        | NM_001161624 | 0.005304 | -5.50688 | 5.45451 | 6.7961  | 0.394586 | -1.34159 | -2.5343  |
| Gnai1         | NM_010305    | 0.003013 | -6.42739 | 4.11629 | 5.45933 | 0.394188 | -1.34304 | -2.53686 |
| Enah          | NM_010135    | 1.53E-07 | -79.0923 | 6.58137 | 7.92601 | 0.393752 | -1.34464 | -2.53967 |
| 1810014F10Rik | NM_026928    | 0.001717 | -7.46979 | 4.64353 | 5.98866 | 0.393618 | -1.34513 | -2.54053 |
| Col3a1        | NM_009930    | 0.000215 | -12.7917 | 11.2612 | 12.6094 | 0.39279  | -1.34817 | -2.54589 |
| Mir154        | NR_029564    | 0.000242 | -12.4104 | 2.99182 | 4.34075 | 0.392584 | -1.34893 | -2.54722 |
| Magt1         | NM_001190409 | 0.000255 | -12.2481 | 9.04671 | 10.3964 | 0.392384 | -1.34966 | -2.54853 |
| Mir155        | NR_029565    | 0.003402 | -6.21975 | 4.06771 | 5.41942 | 0.391828 | -1.35171 | -2.55214 |
| Kdelc2        | NM_212445    | 0.000133 | -14.4586 | 6.90174 | 8.25707 | 0.390846 | -1.35533 | -2.55855 |
| AA388235      | NR_033305    | 0.002841 | -6.52975 | 3.81921 | 5.17533 | 0.390632 | -1.35612 | -2.55995 |
| Hoxb9         | NM_008270    | 0.006117 | -5.2928  | 5.06009 | 6.41722 | 0.390357 | -1.35713 | -2.56176 |
| Pde8b         | NM_172263    | 0.00045  | -10.5875 | 4.95682 | 6.3213  | 0.388374 | -1.36448 | -2.57484 |
| Csf1          | NM_007778    | 0.000338 | -11.3956 | 8.10274 | 9.47249 | 0.386958 | -1.36975 | -2.58426 |
| Jtb           | NM_206924    | 0.00584  | -5.3615  | 7.16272 | 8.53349 | 0.386685 | -1.37077 | -2.58609 |
| Sdr39u1       | NM_001082975 | 8.31E-07 | -51.7993 | 4.8118  | 6.18432 | 0.386215 | -1.37252 | -2.58923 |
| Tnfaip8       | NM_134131    | 0.001894 | -7.27827 | 6.88368 | 8.25872 | 0.38554  | -1.37505 | -2.59377 |
| Cap2          | NM_026056    | 0.00088  | -8.90205 | 4.68196 | 6.05748 | 0.385416 | -1.37551 | -2.5946  |
| Svil          | NM_153153    | 1.16E-05 | -26.7446 | 7.46644 | 8.84501 | 0.3846   | -1.37857 | -2.60011 |
| Tiam1         | NM_009384    | 0.000548 | -10.0631 | 4.86239 | 6.24303 | 0.384051 | -1.38063 | -2.60382 |
| Cdyl          | NM_009881    | 0.000393 | -10.9631 | 3.89675 | 5.28126 | 0.383019 | -1.38451 | -2.61084 |

|          |              |          |          |         |         |          |          |          |
|----------|--------------|----------|----------|---------|---------|----------|----------|----------|
| Irx1     | NM_010573    | 0.000662 | -9.58654 | 5.15539 | 6.54221 | 0.382406 | -1.38682 | -2.61502 |
| Gm1973   | NM_029288    | 0.000344 | -11.3424 | 3.26109 | 4.65275 | 0.381126 | -1.39166 | -2.62381 |
| Hyi      | NM_026601    | 6.99E-05 | -17.0215 | 6.08535 | 7.47883 | 0.380645 | -1.39348 | -2.62712 |
| BC034090 | AK129406     | 0.002905 | -6.49082 | 4.73506 | 6.12864 | 0.38062  | -1.39358 | -2.62729 |
| Leprel2  | NM_013534    | 0.000386 | -11.0125 | 6.81129 | 8.20635 | 0.380228 | -1.39506 | -2.63    |
| Mir377   | NR_029878    | 0.000261 | -12.1827 | 3.38904 | 4.78423 | 0.380196 | -1.39519 | -2.63022 |
| Cyb5     | NM_025797    | 0.000732 | -9.33785 | 8.20826 | 9.60359 | 0.380157 | -1.39533 | -2.63049 |
| Dse      | NM_172508    | 0.000119 | -14.888  | 8.58036 | 9.97783 | 0.379594 | -1.39747 | -2.63439 |
| Rab20    | NM_011227    | 0.000791 | -9.15162 | 5.17068 | 6.56848 | 0.379505 | -1.39781 | -2.63501 |
| Hoxc9    | NM_008272    | 0.005299 | -5.50841 | 4.8936  | 6.29155 | 0.379468 | -1.39795 | -2.63527 |
| Ksr1     | NM_013571    | 0.000824 | -9.05491 | 5.92515 | 7.32378 | 0.379289 | -1.39863 | -2.63651 |
| Gfra2    | NM_008115    | 0.004622 | -5.72004 | 4.59607 | 5.99572 | 0.379022 | -1.39965 | -2.63837 |
| Snx30    | NM_172468    | 0.000677 | -9.52832 | 6.18326 | 7.58394 | 0.37875  | -1.40068 | -2.64026 |
| Cebpd    | NM_007679    | 0.002127 | -7.05673 | 4.6353  | 6.03734 | 0.378394 | -1.40204 | -2.64275 |
| Fndc3a   | NM_207636    | 0.000406 | -10.8745 | 9.06954 | 10.4716 | 0.378383 | -1.40208 | -2.64282 |
| Idua     | NM_008325    | 0.001743 | -7.43953 | 4.92505 | 6.32861 | 0.377996 | -1.40356 | -2.64553 |
| Cnp      | NM_009923    | 0.000892 | -8.87107 | 4.42442 | 5.82907 | 0.37771  | -1.40465 | -2.64753 |
|          | ---          | 0.004985 | -5.60209 | 7.64321 | 9.04903 | 0.377402 | -1.40583 | -2.6497  |
| Nenf     | NM_025424    | 0.001725 | -7.46029 | 7.15421 | 8.56053 | 0.377273 | -1.40632 | -2.6506  |
| Psm8     | NM_010724    | 0.001763 | -7.41788 | 4.02015 | 5.42798 | 0.376878 | -1.40783 | -2.65338 |
| Gm3579   | AY140896     | 0.000459 | -10.5376 | 3.96776 | 5.37677 | 0.376572 | -1.409   | -2.65554 |
| Gm3579   | AY140896     | 0.000459 | -10.5376 | 3.96776 | 5.37677 | 0.376572 | -1.409   | -2.65554 |
| Cyp4v3   | NM_133969    | 5.75E-05 | -17.8815 | 5.27869 | 6.68907 | 0.376212 | -1.41038 | -2.65808 |
| Notch1   | NM_008714    | 0.002717 | -6.60896 | 5.46505 | 6.87618 | 0.376017 | -1.41113 | -2.65945 |
| Cmtm6    | NM_026036    | 8.77E-05 | -16.0696 | 7.23354 | 8.64548 | 0.375805 | -1.41194 | -2.66095 |
| Snai2    | NM_011415    | 0.001611 | -7.59674 | 7.32384 | 8.737   | 0.375488 | -1.41316 | -2.6632  |
| Stxbp6   | NM_144552    | 0.001218 | -8.17664 | 4.65436 | 6.06853 | 0.375224 | -1.41418 | -2.66508 |
| Slc43a1  | NM_001081349 | 0.000401 | -10.9054 | 4.25921 | 5.67359 | 0.375171 | -1.41438 | -2.66545 |
| Tcf4     | NM_013685    | 1.52E-05 | -25.0182 | 8.45273 | 9.86767 | 0.375027 | -1.41493 | -2.66648 |
| Arl5a    | NM_182994    | 0.001368 | -7.93191 | 8.16903 | 9.58425 | 0.374953 | -1.41522 | -2.667   |
| Mir369   | NR_030272    | 0.00079  | -9.15507 | 2.98279 | 4.39845 | 0.374839 | -1.41566 | -2.66781 |

|               |              |          |          |         |         |          |          |          |
|---------------|--------------|----------|----------|---------|---------|----------|----------|----------|
| Ibtk          | NM_001081282 | 0.000624 | -9.73247 | 7.0783  | 8.49551 | 0.374433 | -1.41722 | -2.6707  |
| Gm5458        | NM_001024706 | 0.00016  | -13.7856 | 3.75579 | 5.17347 | 0.374315 | -1.41768 | -2.67155 |
| Fam198a       | BC113767     | 4.35E-05 | -19.1878 | 4.60434 | 6.03018 | 0.372204 | -1.42584 | -2.6867  |
| Tmem223       | NM_025791    | 0.000218 | -12.7516 | 7.90365 | 9.33029 | 0.371996 | -1.42664 | -2.6882  |
| Ntn1          | NM_008744    | 0.000727 | -9.35568 | 5.44953 | 6.87642 | 0.371932 | -1.42689 | -2.68866 |
| Slc2a3        | NM_011401    | 0.002962 | -6.45688 | 4.35938 | 5.78642 | 0.371893 | -1.42704 | -2.68895 |
| Paox          | NM_153783    | 0.001941 | -7.23037 | 5.56153 | 6.98963 | 0.371619 | -1.4281  | -2.69093 |
| D10Ertd610e   | NM_028027    | 2.03E-05 | -23.2499 | 7.81542 | 9.24451 | 0.371366 | -1.42909 | -2.69276 |
| Abcb8         | NM_029020    | 0.000234 | -12.5269 | 5.48792 | 6.91846 | 0.370993 | -1.43054 | -2.69547 |
| Ak5           | NM_001081277 | 0.00449  | -5.76578 | 4.61506 | 6.04581 | 0.370938 | -1.43075 | -2.69587 |
| Maob          | NM_172778    | 9.08E-05 | -15.9284 | 4.73892 | 6.17094 | 0.370613 | -1.43202 | -2.69824 |
| Nbl1          | NM_008675    | 0.000253 | -12.2695 | 7.12237 | 8.55608 | 0.370176 | -1.43372 | -2.70142 |
| 2900062L11Rik | NM_029823    | 0.002405 | -6.82893 | 2.84505 | 4.27998 | 0.369866 | -1.43493 | -2.70368 |
| St6gal1       | NM_145933    | 1.54E-05 | -24.919  | 4.58569 | 6.02678 | 0.368289 | -1.44109 | -2.71526 |
| Tmeff1        | NM_021436    | 0.002575 | -6.70473 | 6.51106 | 7.95233 | 0.368243 | -1.44127 | -2.7156  |
| Leprel1       | NM_173379    | 0.000678 | -9.52583 | 4.1594  | 5.60487 | 0.367173 | -1.44547 | -2.72351 |
| Rab39b        | NM_175122    | 0.005206 | -5.53542 | 4.46955 | 5.91635 | 0.366835 | -1.4468  | -2.72602 |
| H60b          | NM_001177775 | 0.000922 | -8.79548 | 2.81425 | 4.26475 | 0.365896 | -1.45049 | -2.73302 |
| Nmi           | NM_001141949 | 0.000775 | -9.2007  | 3.58886 | 5.04302 | 0.364966 | -1.45417 | -2.73998 |
| Cblb          | NM_001033238 | 5.40E-05 | -18.1665 | 6.75789 | 8.21242 | 0.364873 | -1.45453 | -2.74068 |
| Entpd5        | NM_001026214 | 1.12E-05 | -26.9953 | 6.68748 | 8.14428 | 0.364299 | -1.4568  | -2.745   |
| Hoxb2         | NM_134032    | 0.000163 | -13.7208 | 5.36966 | 6.82827 | 0.363844 | -1.45861 | -2.74843 |
| Fndc4         | NM_022424    | 0.002426 | -6.81277 | 4.59224 | 6.05322 | 0.363248 | -1.46097 | -2.75294 |
| Ckb           | NM_021273    | 0.000997 | -8.61703 | 6.27555 | 7.74053 | 0.36224  | -1.46498 | -2.7606  |
| Ctsb          | NM_007798    | 0.000526 | -10.1732 | 10.5546 | 12.0268 | 0.360415 | -1.47227 | -2.77458 |
| Hoxd4         | NM_010469    | 0.005076 | -5.57429 | 4.03404 | 5.51162 | 0.359089 | -1.47758 | -2.78482 |
| Ssh3          | NM_198113    | 0.000137 | -14.3451 | 5.6055  | 7.08397 | 0.358868 | -1.47847 | -2.78654 |
|               | ---          | 0.000243 | -12.3992 | 8.47271 | 9.95147 | 0.358797 | -1.47876 | -2.78709 |
| Hs3st1        | NM_010474    | 0.000285 | -11.9072 | 4.22781 | 5.70762 | 0.358536 | -1.47981 | -2.78912 |
| Ppl           | NM_008909    | 0.000114 | -15.0448 | 4.89219 | 6.37642 | 0.357439 | -1.48423 | -2.79768 |
| Nsg1          | NM_010942    | 0.000451 | -10.5863 | 8.20536 | 9.68962 | 0.357431 | -1.48426 | -2.79774 |

|         |                        |          |          |         |         |          |          |          |
|---------|------------------------|----------|----------|---------|---------|----------|----------|----------|
| Itga9   | NM_133721              | 0.001434 | -7.83368 | 4.6751  | 6.1602  | 0.357224 | -1.4851  | -2.79936 |
| Slc19a2 | NM_054087              | 0.000412 | -10.8301 | 6.77232 | 8.25864 | 0.356923 | -1.48631 | -2.80172 |
| Pard6g  | NM_053117              | 0.000627 | -9.72107 | 5.15364 | 6.6405  | 0.356789 | -1.48686 | -2.80278 |
| Fah     | NM_010176              | 0.000539 | -10.1092 | 4.47589 | 5.96785 | 0.355529 | -1.49196 | -2.81271 |
| Btg2    | NM_007570              | 0.001257 | -8.10906 | 5.58009 | 7.07291 | 0.355317 | -1.49282 | -2.81439 |
| A4galt  | NM_001170954           | 0.004132 | -5.89862 | 6.04935 | 7.5428  | 0.355162 | -1.49345 | -2.81561 |
| Nfil3   | NM_017373              | 0.00056  | -10.0102 | 7.20482 | 8.69934 | 0.354897 | -1.49453 | -2.81772 |
| Ahnak2  | BC138468               | 0.000264 | -12.1456 | 8.0481  | 9.54727 | 0.353757 | -1.49917 | -2.8268  |
| Lhfp12  | NM_172589              | 8.99E-05 | -15.9708 | 8.83234 | 10.3353 | 0.352827 | -1.50297 | -2.83425 |
| Esr1    | NM_007956              | 0.005539 | -5.44104 | 4.72984 | 6.23545 | 0.352181 | -1.50561 | -2.83945 |
|         | ---                    | 0.000107 | -15.2665 | 3.94425 | 5.4502  | 0.352099 | -1.50595 | -2.84011 |
| Naprt1  | NM_172607              | 0.002924 | -6.4793  | 5.37215 | 6.87817 | 0.35208  | -1.50603 | -2.84027 |
| Tpst1   | NM_001130476           | 6.61E-05 | -17.2642 | 7.38087 | 8.88717 | 0.352012 | -1.5063  | -2.84081 |
| Slc6a8  | NM_133987              | 0.000493 | -10.3457 | 6.62436 | 8.13696 | 0.35048  | -1.5126  | -2.85323 |
| Zfp7    | NM_145916              | 0.000241 | -12.4303 | 3.64788 | 5.16171 | 0.350181 | -1.51383 | -2.85567 |
| Tnik    | NM_026910              | 0.000407 | -10.8649 | 4.91383 | 6.428   | 0.350099 | -1.51417 | -2.85634 |
| Gm13691 | NM_001177432           | 0.000291 | -11.8434 | 8.40674 | 9.92132 | 0.35     | -1.51457 | -2.85714 |
| Gm13691 | NM_001177432           | 0.000291 | -11.8434 | 8.40674 | 9.92132 | 0.35     | -1.51457 | -2.85714 |
| Gm13691 | NM_001177432           | 0.000291 | -11.8434 | 8.40674 | 9.92132 | 0.35     | -1.51457 | -2.85714 |
| Gm13691 | NM_001177432           | 0.000291 | -11.8434 | 8.40674 | 9.92132 | 0.35     | -1.51457 | -2.85714 |
| Gm13691 | NM_001177432           | 0.000291 | -11.8434 | 8.40674 | 9.92132 | 0.35     | -1.51457 | -2.85714 |
| Gm13691 | NM_001177432           | 0.000291 | -11.8434 | 8.40674 | 9.92132 | 0.35     | -1.51457 | -2.85714 |
| Gm13691 | NM_001177432           | 0.000291 | -11.8434 | 8.40674 | 9.92132 | 0.35     | -1.51457 | -2.85714 |
| ND6     | ENSMUST0000008241<br>9 | 0.006399 | -5.22649 | 9.14835 | 10.6661 | 0.349232 | -1.51774 | -2.86342 |
| Errfi1  | NM_133753              | 0.002022 | -7.15193 | 7.89852 | 9.41922 | 0.348518 | -1.52069 | -2.86929 |
| Lxn     | NM_016753              | 0.002782 | -6.56693 | 7.31474 | 8.8422  | 0.346888 | -1.52746 | -2.88277 |
| Hic1    | NM_010430              | 0.003484 | -6.17959 | 5.56518 | 7.09372 | 0.346629 | -1.52854 | -2.88493 |
| Gng8    | NM_010320              | 0.000987 | -8.63886 | 4.81196 | 6.34399 | 0.345792 | -1.53202 | -2.89191 |
| Ralgds  | NM_001145835           | 0.001238 | -8.14274 | 6.23476 | 7.76984 | 0.345062 | -1.53507 | -2.89803 |
| Scara3  | NM_172604              | 0.000507 | -10.2683 | 4.46819 | 6.00341 | 0.345027 | -1.53522 | -2.89833 |

|          |              |          |          |         |         |          |          |          |
|----------|--------------|----------|----------|---------|---------|----------|----------|----------|
| Gclc     | NM_010295    | 0.000415 | -10.81   | 7.23366 | 8.77002 | 0.344755 | -1.53636 | -2.90061 |
| Dzip1    | NM_025943    | 0.000539 | -10.1101 | 6.2959  | 7.83462 | 0.344189 | -1.53873 | -2.90538 |
| Ttyh3    | NM_175274    | 2.98E-05 | -21.1111 | 7.03804 | 8.57825 | 0.343836 | -1.54021 | -2.90836 |
| Moxd1    | NM_021509    | 0.00301  | -6.42889 | 4.07155 | 5.61247 | 0.343668 | -1.54091 | -2.90979 |
| Fosl2    | NM_008037    | 0.000121 | -14.8056 | 7.32238 | 8.87203 | 0.341593 | -1.54965 | -2.92746 |
| Aoc3     | NM_009675    | 0.000411 | -10.8423 | 5.72243 | 7.2797  | 0.339795 | -1.55727 | -2.94295 |
| Dnajc15  | NM_025384    | 0.002398 | -6.8344  | 5.80816 | 7.37092 | 0.338502 | -1.56276 | -2.95419 |
| Sgpp1    | NM_030750    | 4.75E-05 | -18.7613 | 7.32997 | 8.89739 | 0.337412 | -1.56742 | -2.96374 |
| Pip4k2a  | NM_008845    | 0.000344 | -11.3498 | 6.64246 | 8.21113 | 0.33712  | -1.56866 | -2.9663  |
| Ctsz     | NM_022325    | 0.000464 | -10.5041 | 9.80226 | 11.3726 | 0.336725 | -1.57036 | -2.96979 |
| Lhfp     | NM_175386    | 9.33E-05 | -15.8214 | 7.41675 | 8.98814 | 0.336483 | -1.57139 | -2.97192 |
| Idh1     | NM_010497    | 0.001088 | -8.42163 | 9.27469 | 10.853  | 0.334868 | -1.57834 | -2.98625 |
| Mageh1   | NM_023788    | 0.003189 | -6.32931 | 3.9852  | 5.57426 | 0.332387 | -1.58907 | -3.00854 |
| Bcor     | NM_029510    | 0.000211 | -12.858  | 4.61471 | 6.20412 | 0.332307 | -1.58941 | -3.00926 |
| Angptl2  | NM_011923    | 0.002741 | -6.59318 | 8.73638 | 10.336  | 0.329963 | -1.59962 | -3.03064 |
| Eid2b    | NM_001177427 | 0.000723 | -9.36855 | 4.53519 | 6.13661 | 0.329552 | -1.60142 | -3.03443 |
| Rnf144a  | NM_001081977 | 2.58E-05 | -21.878  | 5.298   | 6.9023  | 0.328895 | -1.6043  | -3.04048 |
| Rnf113a2 | NM_025525    | 0.004034 | -5.93749 | 4.49915 | 6.10346 | 0.328894 | -1.6043  | -3.04049 |
| Kctd12b  | NM_175429    | 0.002721 | -6.60624 | 4.22806 | 5.83863 | 0.327469 | -1.61057 | -3.05372 |
| Klhl23   | NM_177784    | 0.000614 | -9.7746  | 3.77723 | 5.38974 | 0.327029 | -1.61251 | -3.05783 |
| Csrp2    | NM_007792    | 0.004503 | -5.76133 | 7.16193 | 8.7769  | 0.326472 | -1.61497 | -3.06305 |
| Ryk      | NM_013649    | 3.09E-05 | -20.9103 | 8.17329 | 9.78892 | 0.326323 | -1.61563 | -3.06445 |
| Lbh      | NM_029999    | 0.000152 | -13.979  | 7.75173 | 9.3699  | 0.325747 | -1.61818 | -3.06987 |
| Grasp    | NM_019518    | 0.005966 | -5.32972 | 6.43908 | 8.05743 | 0.325707 | -1.61835 | -3.07024 |
| Mir543   | NR_030261    | 0.000191 | -13.1874 | 3.31604 | 4.9355  | 0.325458 | -1.61946 | -3.07259 |
|          | ---          | 0.003003 | -6.43337 | 4.05958 | 5.67945 | 0.325366 | -1.61987 | -3.07347 |
| Rcn3     | NM_026555    | 0.000238 | -12.4674 | 9.69373 | 11.3145 | 0.325166 | -1.62075 | -3.07536 |
| Cfb      | NM_008198    | 0.002346 | -6.87442 | 5.25531 | 6.8771  | 0.324932 | -1.62179 | -3.07757 |
| Camk1d   | NM_177343    | 0.000763 | -9.23896 | 4.3107  | 5.93305 | 0.324806 | -1.62235 | -3.07876 |
| Stox2    | NM_175162    | 0.002891 | -6.49915 | 3.949   | 5.57182 | 0.324701 | -1.62282 | -3.07976 |
| Tshz1    | NM_001081300 | 0.000319 | -11.5655 | 6.27968 | 7.90371 | 0.324428 | -1.62403 | -3.08235 |



|          |                        |          |          |         |         |          |          |          |
|----------|------------------------|----------|----------|---------|---------|----------|----------|----------|
|          | ---                    | 0.003459 | -6.1916  | 9.16736 | 10.7934 | 0.323987 | -1.62599 | -3.08655 |
| Zfp105   | NM_009544              | 0.000723 | -9.36884 | 3.66613 | 5.29324 | 0.323735 | -1.62712 | -3.08895 |
| Ece2     | NM_139293              | 0.000482 | -10.402  | 4.74622 | 6.37682 | 0.322954 | -1.6306  | -3.09642 |
| Gm5458   | NM_001024706           | 0.000798 | -9.13239 | 3.73355 | 5.36818 | 0.322054 | -1.63463 | -3.10507 |
| Trerf1   | NM_001097623           | 0.000177 | -13.4445 | 5.12625 | 6.76266 | 0.321656 | -1.63641 | -3.10891 |
| Flrt2    | NM_201518              | 0.003825 | -6.0243  | 7.06701 | 8.70477 | 0.321355 | -1.63776 | -3.11182 |
| Pcdhb16  | NM_053141              | 0.001412 | -7.86613 | 6.6038  | 8.24168 | 0.321328 | -1.63788 | -3.11209 |
| Pir      | NM_027153              | 4.61E-05 | -18.9015 | 4.46561 | 6.10907 | 0.320088 | -1.64346 | -3.12415 |
| Mapkapk3 | NM_178907              | 0.001736 | -7.44764 | 4.53986 | 6.18512 | 0.319688 | -1.64527 | -3.12805 |
| Tmem154  | NM_177260              | 0.000658 | -9.60114 | 3.73016 | 5.38093 | 0.318471 | -1.65077 | -3.14001 |
| Col4a5   | NM_001163155           | 0.000232 | -12.5462 | 5.13367 | 6.78997 | 0.317253 | -1.6563  | -3.15206 |
| Rassf8   | ENSMUST0000011170<br>4 | 0.000305 | -11.7015 | 6.47059 | 8.127   | 0.317229 | -1.6564  | -3.15229 |
| Gm10808  | ENSMUST0000009972<br>8 | 0.001272 | -8.0841  | 4.02088 | 5.68051 | 0.316519 | -1.65964 | -3.15937 |
| B4galnt1 | NM_008080              | 0.001008 | -8.59314 | 5.10266 | 6.76378 | 0.316194 | -1.66112 | -3.16261 |
| Six1     | NM_009189              | 0.003729 | -6.06649 | 3.68455 | 5.34736 | 0.315824 | -1.66281 | -3.16632 |
| Slc36a4  | NM_172289              | 0.000299 | -11.7654 | 7.02258 | 8.68548 | 0.315804 | -1.6629  | -3.16652 |
| Greb1l   | NM_001083628           | 0.000469 | -10.4803 | 4.79541 | 6.46255 | 0.314876 | -1.66714 | -3.17585 |
| Dennd2c  | NM_177857              | 0.006307 | -5.24773 | 4.35935 | 6.02884 | 0.314364 | -1.66949 | -3.18103 |
| Ano3     | NM_001128103           | 0.005056 | -5.58027 | 3.58902 | 5.25978 | 0.314088 | -1.67076 | -3.18382 |
| Cebpa    | NM_007678              | 0.001116 | -8.36651 | 4.78772 | 6.46061 | 0.313625 | -1.67289 | -3.18852 |
| Hebp1    | NM_013546              | 0.000418 | -10.7904 | 4.7398  | 6.41456 | 0.313219 | -1.67476 | -3.19266 |
| Rnf24    | NM_178607              | 0.003017 | -6.4249  | 5.72052 | 7.3986  | 0.312498 | -1.67808 | -3.20002 |
|          | ---                    | 0.001324 | -7.99948 | 4.0363  | 5.71739 | 0.311846 | -1.68109 | -3.20671 |
| Mir679   | NR_030445              | 0.003478 | -6.18237 | 5.28765 | 6.9702  | 0.311532 | -1.68255 | -3.20994 |
|          | ---                    | 6.81E-05 | -17.1302 | 4.53339 | 6.21988 | 0.310681 | -1.68649 | -3.21873 |
| Capns2   | NM_027112              | 0.000828 | -9.04447 | 4.34827 | 6.03611 | 0.310393 | -1.68783 | -3.22172 |
| Layn     | NM_001033534           | 0.004641 | -5.71378 | 7.34501 | 9.03297 | 0.310366 | -1.68796 | -3.22201 |
| Fam78b   | NM_001160262           | 4.02E-05 | -19.5665 | 3.70625 | 5.40119 | 0.308867 | -1.69494 | -3.23764 |
| Ica1     | NM_010492              | 0.000199 | -13.0505 | 3.56962 | 5.26761 | 0.308215 | -1.69799 | -3.24449 |
| Pfkfb3   | NM_001177753           | 0.003848 | -6.01476 | 6.1756  | 7.87474 | 0.307971 | -1.69914 | -3.24706 |

|               |              |          |          |         |         |          |          |          |
|---------------|--------------|----------|----------|---------|---------|----------|----------|----------|
| BC005764      | NR_033210    | 0.004053 | -5.93012 | 5.50617 | 7.20803 | 0.307389 | -1.70186 | -3.2532  |
| Inpp1         | NM_008384    | 2.16E-05 | -22.888  | 4.89573 | 6.59885 | 0.30712  | -1.70313 | -3.25606 |
|               | ---          | 0.000376 | -11.0914 | 5.51847 | 7.2225  | 0.306927 | -1.70403 | -3.2581  |
| Pld2          | NM_008876    | 4.88E-05 | -18.6319 | 4.88164 | 6.58788 | 0.306457 | -1.70624 | -3.2631  |
| Rasl11a       | NM_026864    | 0.007097 | -5.07676 | 5.5126  | 7.22107 | 0.305985 | -1.70847 | -3.26813 |
| Mgll          | NM_001166251 | 0.001661 | -7.53599 | 5.13674 | 6.84573 | 0.305876 | -1.70898 | -3.2693  |
| Chsy3         | NM_001081328 | 0.004061 | -5.92687 | 4.78338 | 6.49302 | 0.305736 | -1.70964 | -3.27079 |
| Smarca1       | NM_053123    | 0.002035 | -7.14049 | 3.83539 | 5.54681 | 0.305358 | -1.71142 | -3.27484 |
| Fkbp7         | NM_010222    | 0.002234 | -6.96455 | 7.54912 | 9.26523 | 0.304369 | -1.71611 | -3.28549 |
| Cxcl16        | NM_023158    | 0.000451 | -10.5842 | 4.04488 | 5.76229 | 0.304094 | -1.71741 | -3.28845 |
| Zfhx4         | NM_030708    | 0.002997 | -6.4365  | 5.74781 | 7.46654 | 0.303817 | -1.71873 | -3.29145 |
| Enox1         | NM_172813    | 0.001237 | -8.14361 | 5.06599 | 6.78575 | 0.303599 | -1.71976 | -3.29382 |
| Mmp23         | NM_011985    | 0.001097 | -8.40394 | 4.5132  | 6.23487 | 0.303197 | -1.72167 | -3.29818 |
| Gm3002        | NR_033388    | 0.002688 | -6.628   | 3.91092 | 5.63336 | 0.303036 | -1.72244 | -3.29994 |
| Phactr2       | NM_001195096 | 0.000876 | -8.91339 | 3.85237 | 5.57569 | 0.302851 | -1.72332 | -3.30195 |
| Pcdhb14       | NM_053139    | 0.001971 | -7.20155 | 3.64545 | 5.36918 | 0.302764 | -1.72373 | -3.3029  |
| Mmp27         | NM_001030289 | 0.000147 | -14.0878 | 3.89549 | 5.62336 | 0.301897 | -1.72787 | -3.31238 |
| Fxyd1         | NM_052992    | 0.000105 | -15.3643 | 7.19884 | 8.92742 | 0.301747 | -1.72859 | -3.31403 |
| Armcx1        | NM_001166377 | 1.11E-05 | -27.0635 | 5.90011 | 7.62948 | 0.301582 | -1.72938 | -3.31585 |
| Gch1          | NM_008102    | 6.65E-05 | -17.2318 | 3.57442 | 5.30523 | 0.301283 | -1.73081 | -3.31914 |
| Antxr1        | NM_054041    | 1.38E-05 | -25.6043 | 8.52643 | 10.2601 | 0.300694 | -1.73363 | -3.32564 |
| Tmed3         | NM_025360    | 0.000218 | -12.7561 | 7.51219 | 9.24684 | 0.300482 | -1.73465 | -3.32799 |
| Nr4a2         | NM_001139509 | 0.005782 | -5.37641 | 6.46643 | 8.20313 | 0.300056 | -1.73669 | -3.33271 |
| 2010002N04Rik | NM_134133    | 0.006537 | -5.19541 | 6.705   | 8.44213 | 0.299966 | -1.73713 | -3.33371 |
| Rad9b         | NM_144912    | 0.005186 | -5.54126 | 4.65206 | 6.39186 | 0.299412 | -1.7398  | -3.33988 |
| Abcd2         | NM_011994    | 0.000159 | -13.8239 | 4.97842 | 6.71918 | 0.299211 | -1.74077 | -3.34212 |
| Lhx8          | NM_010713    | 0.004697 | -5.69482 | 4.23141 | 5.97228 | 0.299189 | -1.74087 | -3.34236 |
| Kif26b        | NM_001161665 | 0.000733 | -9.33629 | 5.68058 | 7.42251 | 0.298969 | -1.74193 | -3.34483 |
| Mir134        | NR_029548    | 0.000647 | -9.64127 | 5.83584 | 7.58174 | 0.298149 | -1.74589 | -3.35403 |
| Slc2a13       | NM_001033633 | 9.32E-05 | -15.8252 | 5.5014  | 7.24731 | 0.298146 | -1.74591 | -3.35406 |
| Cercam        | NM_207298    | 0.003407 | -6.21697 | 5.2364  | 6.98308 | 0.297988 | -1.74667 | -3.35584 |

|               |              |          |          |         |         |          |          |          |
|---------------|--------------|----------|----------|---------|---------|----------|----------|----------|
| Kif26b        | NM_001161665 | 0.000365 | -11.1721 | 5.77469 | 7.5237  | 0.297507 | -1.749   | -3.36126 |
| Nme4          | NM_019731    | 0.000397 | -10.9361 | 4.6299  | 6.38826 | 0.295582 | -1.75837 | -3.38315 |
| Nudt12        | NM_026497    | 0.000117 | -14.9298 | 4.101   | 5.86486 | 0.29446  | -1.76386 | -3.39605 |
| BC026585      | NM_001033284 | 0.005882 | -5.35098 | 4.59185 | 6.35715 | 0.294166 | -1.7653  | -3.39944 |
| Tmem119       | NM_146162    | 0.002179 | -7.01081 | 6.42523 | 8.19265 | 0.293734 | -1.76742 | -3.40444 |
| Mir380        | NR_029881    | 2.17E-05 | -22.8572 | 2.90388 | 4.67895 | 0.292181 | -1.77506 | -3.42253 |
| Rhoj          | NM_023275    | 3.32E-05 | -20.5346 | 7.53152 | 9.31207 | 0.291072 | -1.78055 | -3.43557 |
| Gstt1         | NM_008185    | 2.34E-05 | -22.4339 | 4.93104 | 6.71456 | 0.290474 | -1.78352 | -3.44265 |
| Tbx3          | NM_011535    | 0.000571 | -9.96042 | 7.01745 | 8.80387 | 0.289891 | -1.78642 | -3.44958 |
| Gm1973        | NM_029288    | 0.006267 | -5.25712 | 3.7827  | 5.57172 | 0.289369 | -1.78902 | -3.4558  |
| Sirpa         | NM_007547    | 1.10E-05 | -27.0877 | 7.01014 | 8.80175 | 0.288849 | -1.79161 | -3.46202 |
| Fam13a        | NM_153574    | 0.000717 | -9.38736 | 3.63344 | 5.42753 | 0.288352 | -1.7941  | -3.46798 |
| Crip1         | NM_007763    | 0.001355 | -7.951   | 5.98958 | 7.78591 | 0.287907 | -1.79632 | -3.47334 |
| Gm9927        | AK034060     | 9.98E-05 | -15.5514 | 2.84787 | 4.64569 | 0.287608 | -1.79782 | -3.47696 |
| G630090E17Rik | NM_001173500 | 0.001495 | -7.74832 | 3.05152 | 4.85415 | 0.28665  | -1.80264 | -3.48857 |
| 4930523C07Rik | NM_001162896 | 0.000348 | -11.313  | 5.73578 | 7.54224 | 0.285893 | -1.80646 | -3.49782 |
| Ctsh          | NM_007801    | 0.00375  | -6.05692 | 3.85341 | 5.66132 | 0.285605 | -1.80791 | -3.50134 |
|               | ---          | 0.000127 | -14.6375 | 4.36662 | 6.17913 | 0.284695 | -1.81251 | -3.51253 |
| Tgfbr2        | NM_009371    | 0.003979 | -5.95991 | 7.88615 | 9.70099 | 0.284236 | -1.81484 | -3.5182  |
| Gas7          | NM_008088    | 0.002808 | -6.55084 | 6.85846 | 8.67405 | 0.284087 | -1.81559 | -3.52005 |
| Cyp2j9        | NM_028979    | 0.000614 | -9.77387 | 4.0402  | 5.85818 | 0.283618 | -1.81798 | -3.52586 |
| Mgmt          | NM_008598    | 0.000702 | -9.44216 | 4.94614 | 6.76598 | 0.283253 | -1.81984 | -3.53042 |
| Pf1e1         | NM_019588    | 0.003237 | -6.30412 | 4.02032 | 5.84142 | 0.283005 | -1.8211  | -3.53351 |
| Hhip1         | NM_001044380 | 3.34E-05 | -20.5045 | 5.35592 | 7.17858 | 0.2827   | -1.82266 | -3.53732 |
| Xlr3a         | NM_001110784 | 0.000573 | -9.94802 | 3.70548 | 5.53164 | 0.282013 | -1.82617 | -3.54594 |
| Arhgef5       | NM_133674    | 1.21E-05 | -26.4786 | 4.55137 | 6.3779  | 0.281943 | -1.82653 | -3.54682 |
| Hoxb7         | NM_010460    | 0.001178 | -8.24994 | 5.30815 | 7.13473 | 0.281932 | -1.82658 | -3.54696 |
| Xylt1         | NM_175645    | 0.000956 | -8.71309 | 4.92676 | 6.75569 | 0.281473 | -1.82893 | -3.55274 |
| 4930555G01Rik | NM_175393    | 0.00163  | -7.57357 | 3.8143  | 5.64457 | 0.281212 | -1.83027 | -3.55604 |
| 4930555G01Rik | NM_175393    | 0.00163  | -7.57357 | 3.8143  | 5.64457 | 0.281212 | -1.83027 | -3.55604 |
| Tet2          | NM_001040400 | 4.31E-05 | -19.2253 | 4.17581 | 6.00816 | 0.280806 | -1.83235 | -3.56118 |

|         |              |          |          |         |         |          |          |          |
|---------|--------------|----------|----------|---------|---------|----------|----------|----------|
| Fam43a  | NM_177632    | 9.07E-06 | -28.4606 | 5.36229 | 7.1949  | 0.280757 | -1.83261 | -3.5618  |
| Slc8a1  | NM_011406    | 0.000734 | -9.33262 | 3.81742 | 5.65242 | 0.280291 | -1.835   | -3.56772 |
| Flt1    | NM_010228    | 0.000401 | -10.91   | 5.0449  | 6.88402 | 0.279493 | -1.83912 | -3.57791 |
| Letmd1  | NM_134093    | 5.07E-05 | -18.4566 | 5.1222  | 6.96167 | 0.279423 | -1.83947 | -3.5788  |
| Zfp667  | NM_001024928 | 0.000106 | -15.2986 | 4.80266 | 6.65001 | 0.277903 | -1.84735 | -3.59838 |
| Sparcl1 | NM_010097    | 0.001462 | -7.79326 | 4.34185 | 6.1908  | 0.277593 | -1.84896 | -3.6024  |
| Plcb1   | NM_019677    | 8.32E-05 | -16.2862 | 5.57941 | 7.42863 | 0.277542 | -1.84922 | -3.60305 |
| Xdh     | NM_011723    | 0.001023 | -8.55887 | 8.41368 | 10.2684 | 0.276482 | -1.85474 | -3.61687 |
| Adcy2   | NM_153534    | 0.001448 | -7.81286 | 4.0396  | 5.89886 | 0.275617 | -1.85926 | -3.62822 |
| Acsf2   | NM_153807    | 0.000125 | -14.6958 | 4.10865 | 5.96842 | 0.275521 | -1.85977 | -3.62949 |
| Gli2    | NM_001081125 | 0.002084 | -7.09495 | 5.24277 | 7.10538 | 0.274979 | -1.86261 | -3.63665 |
| Nol3    | NM_030152    | 0.000198 | -13.071  | 4.97445 | 6.83718 | 0.274955 | -1.86273 | -3.63696 |
| Fzd6    | NM_008056    | 0.003103 | -6.37638 | 4.59774 | 6.463   | 0.274475 | -1.86526 | -3.64333 |
| Fgd4    | NM_139232    | 0.005448 | -5.46617 | 3.46743 | 5.33579 | 0.273886 | -1.86835 | -3.65115 |
| Acsf2   | NM_153807    | 9.62E-06 | -28.0446 | 4.33679 | 6.2118  | 0.272625 | -1.87501 | -3.66804 |
| Enc1    | NM_007930    | 0.000742 | -9.306   | 7.40195 | 9.27879 | 0.27228  | -1.87684 | -3.67269 |
| Trf     | NM_133977    | 0.002969 | -6.45318 | 4.86786 | 6.74695 | 0.271855 | -1.87909 | -3.67844 |
| Scarf2  | NM_153790    | 0.001305 | -8.02951 | 5.65067 | 7.53046 | 0.271724 | -1.87979 | -3.68021 |
| Bambi   | NM_026505    | 0.000137 | -14.3594 | 5.40217 | 7.28196 | 0.271724 | -1.87979 | -3.68021 |
| Egr1    | NM_007913    | 0.000176 | -13.4652 | 5.37403 | 7.25918 | 0.270715 | -1.88515 | -3.69392 |
| Gnptab  | NM_001004164 | 8.36E-05 | -16.2644 | 7.2329  | 9.13399 | 0.267742 | -1.90109 | -3.73494 |
| Fat4    | NM_183221    | 0.000815 | -9.08178 | 5.54853 | 7.44965 | 0.267736 | -1.90111 | -3.73502 |
| Arhgap6 | NM_009707    | 9.42E-05 | -15.7824 | 3.9184  | 5.82696 | 0.266359 | -1.90856 | -3.75434 |
| Gpx7    | NM_024198    | 0.000614 | -9.77227 | 4.5193  | 6.42799 | 0.266334 | -1.90869 | -3.75468 |
| Zfp518a | NM_028319    | 0.001096 | -8.40637 | 3.22654 | 5.13909 | 0.265622 | -1.91256 | -3.76475 |
| Fzd1    | NM_021457    | 9.28E-05 | -15.8416 | 8.30323 | 10.2166 | 0.26547  | -1.91338 | -3.7669  |
| Ddit4l  | NM_030143    | 0.000688 | -9.48863 | 4.74321 | 6.66373 | 0.264158 | -1.92053 | -3.78561 |
| Pde4b   | NM_019840    | 0.005664 | -5.40738 | 4.66619 | 6.59206 | 0.263182 | -1.92587 | -3.79965 |
| Mir329  | NR_029762    | 7.48E-05 | -16.7287 | 3.98388 | 5.91274 | 0.262637 | -1.92886 | -3.80754 |
| Tuba4a  | NM_009447    | 0.000192 | -13.1613 | 5.18628 | 7.11827 | 0.262068 | -1.93198 | -3.8158  |
| Thbs2   | NM_011581    | 0.001299 | -8.03953 | 9.8544  | 11.7867 | 0.262005 | -1.93233 | -3.81671 |

|               |                     |                 |                 |                |                |                |                 |                 |
|---------------|---------------------|-----------------|-----------------|----------------|----------------|----------------|-----------------|-----------------|
| Ghr           | NM_010284           | 0.000114        | -15.0513        | 9.1836         | 11.119         | 0.261454       | -1.93537        | -3.82476        |
| Rbms3         | NM_001172123        | 2.34E-05        | -22.4398        | 7.05591        | 8.99139        | 0.261434       | -1.93548        | -3.82505        |
| Fgfr2         | NM_010207           | 0.003008        | -6.43011        | 5.79403        | 7.73222        | 0.260943       | -1.93819        | -3.83225        |
| Bace2         | NM_019517           | 0.001018        | -8.56989        | 4.29173        | 6.23787        | 0.259509       | -1.94614        | -3.85342        |
|               | ---                 | 0.000383        | -11.0377        | 7.90174        | 9.85058        | 0.259025       | -1.94884        | -3.86063        |
| Zrsr1         | NM_011663           | 8.17E-05        | -16.3601        | 4.03886        | 5.98931        | 0.258736       | -1.95045        | -3.86494        |
| Pygl          | NM_133198           | 0.002902        | -6.49287        | 4.47397        | 6.42947        | 0.25783        | -1.95551        | -3.87852        |
| Pion          | NM_175437           | 0.000693        | -9.47396        | 3.68791        | 5.64346        | 0.257823       | -1.95555        | -3.87864        |
| H2-T23        | NM_010398           | 0.000353        | -11.2706        | 6.20271        | 8.16515        | 0.256595       | -1.96243        | -3.89719        |
| Lrig3         | NM_177152           | 0.000748        | -9.28743        | 6.63003        | 8.59679        | 0.255827       | -1.96676        | -3.90889        |
| Auts2         | NM_177047           | 0.000144        | -14.1625        | 4.34953        | 6.31799        | 0.255526       | -1.96846        | -3.9135         |
| Ptk7          | NM_175168           | 0.001423        | -7.84955        | 5.32477        | 7.29476        | 0.255255       | -1.96999        | -3.91765        |
| Fndc1         | NM_001081416        | 0.000656        | -9.60737        | 4.25821        | 6.23589        | 0.253899       | -1.97768        | -3.93858        |
| Gstt3         | NM_133994           | 0.000332        | -11.4517        | 5.27145        | 7.25193        | 0.253405       | -1.98048        | -3.94626        |
| Parm1         | NM_145562           | 0.000267        | -12.1122        | 5.04413        | 7.0283         | 0.252759       | -1.98417        | -3.95634        |
| Mef2c         | NM_001170537        | 0.001214        | -8.18471        | 4.01849        | 6.00371        | 0.252574       | -1.98522        | -3.95923        |
| Lpar1         | NM_010336           | 8.87E-05        | -16.0215        | 7.44658        | 9.43587        | 0.251863       | -1.98929        | -3.97041        |
| Enpp5         | NM_032003           | 0.000322        | -11.5372        | 3.97507        | 5.96446        | 0.251846       | -1.98939        | -3.97069        |
| Armcx6        | NM_001007578        | 0.001328        | -7.99396        | 4.79508        | 6.78496        | 0.25176        | -1.98988        | -3.97204        |
| Map3k8        | NM_007746           | 0.000144        | -14.1695        | 5.43194        | 7.42764        | 0.250747       | -1.99569        | -3.98808        |
| Kera          | NM_008438           | 0.006252        | -5.26062        | 3.86966        | 5.87176        | 0.249636       | -2.0021         | -4.00583        |
| Sema7a        | NM_011352           | 6.33E-06        | -31.1541        | 5.29587        | 7.29933        | 0.249401       | -2.00346        | -4.00961        |
| 2610524H06Rik | NM_181075           | 0.000952        | -8.72167        | 4.57214        | 6.57572        | 0.249379       | -2.00359        | -4.00996        |
| Usp11         | NM_145628           | 0.000116        | -14.9647        | 4.53496        | 6.53913        | 0.249278       | -2.00417        | -4.01159        |
| <b>Pdgfrb</b> | <b>NM_001146268</b> | <b>0.000456</b> | <b>-10.5563</b> | <b>8.88502</b> | <b>10.8898</b> | <b>0.24918</b> | <b>-2.00474</b> | <b>-4.01316</b> |
| Gas5          | NR_002840           | 5.42E-05        | -18.1512        | 9.658          | 11.6638        | 0.248992       | -2.00583        | -4.0162         |
| Pde3a         | NM_018779           | 0.003315        | -6.26337        | 4.08075        | 6.08868        | 0.248629       | -2.00793        | -4.02205        |
| Ccl7          | NM_013654           | 0.002364        | -6.86033        | 7.80147        | 9.81067        | 0.248411       | -2.0092         | -4.02559        |
|               | ---                 | 0.000481        | -10.4078        | 4.67667        | 6.68617        | 0.248358       | -2.00951        | -4.02644        |
| Atp1b1        | NM_009721           | 0.004036        | -5.93681        | 4.32604        | 6.33611        | 0.248261       | -2.01007        | -4.02802        |
| Mir323        | NR_029757           | 4.87E-05        | -18.6425        | 4.08443        | 6.09936        | 0.247426       | -2.01493        | -4.04161        |

|         |              |          |          |         |         |          |          |          |
|---------|--------------|----------|----------|---------|---------|----------|----------|----------|
| Bcl3    | NM_033601    | 0.000341 | -11.368  | 5.3048  | 7.32077 | 0.247247 | -2.01597 | -4.04454 |
| Trim13  | NM_001164220 | 2.85E-05 | -21.351  | 3.04904 | 5.06585 | 0.247103 | -2.01681 | -4.04689 |
| Greb1l  | NM_001083628 | 8.40E-05 | -16.2484 | 4.11886 | 6.14093 | 0.246205 | -2.02207 | -4.06166 |
| Khdrbs3 | NM_010158    | 0.002222 | -6.97449 | 4.82104 | 6.84694 | 0.245552 | -2.0259  | -4.07245 |
| Xlr3c   | NM_011727    | 0.000277 | -11.9918 | 3.48934 | 5.52481 | 0.243929 | -2.03547 | -4.09956 |
| Lsp1    | NM_019391    | 0.000154 | -13.9196 | 7.57458 | 9.61022 | 0.243901 | -2.03563 | -4.10003 |
|         | ---          | 0.002744 | -6.59124 | 5.98022 | 8.01636 | 0.243815 | -2.03614 | -4.10148 |
| C3      | NM_009778    | 0.000184 | -13.3177 | 10.2986 | 12.338  | 0.243275 | -2.03934 | -4.11058 |
| Pnp2    | NM_001123371 | 1.15E-05 | -26.8107 | 9.15488 | 11.1958 | 0.243014 | -2.04089 | -4.11499 |
| Sumo3   | NM_019929    | 0.000185 | -13.3041 | 6.67898 | 8.72142 | 0.242752 | -2.04245 | -4.11943 |
| Plagl1  | NM_009538    | 0.004488 | -5.76649 | 4.442   | 6.48939 | 0.241922 | -2.04739 | -4.13357 |
| Tbx15   | NM_009323    | 2.66E-05 | -21.7167 | 7.30299 | 9.35524 | 0.241108 | -2.05225 | -4.14752 |
| Fmr1    | NM_008031    | 1.59E-05 | -24.7254 | 8.0256  | 10.0803 | 0.240706 | -2.05466 | -4.15445 |
| Slc19a1 | NM_031196    | 0.001187 | -8.23265 | 5.39146 | 7.44762 | 0.240456 | -2.05615 | -4.15876 |
| Aldh7a1 | NM_001127338 | 1.39E-06 | -45.5126 | 6.75594 | 8.81255 | 0.240381 | -2.05661 | -4.16006 |
| Nox4    | NM_015760    | 0.000138 | -14.3251 | 3.91718 | 5.97691 | 0.239862 | -2.05972 | -4.16906 |
| Gm3002  | NR_033388    | 0.000829 | -9.04025 | 4.14917 | 6.2306  | 0.23628  | -2.08143 | -4.23227 |
| Pdk4    | NM_013743    | 0.000557 | -10.0243 | 4.07573 | 6.16318 | 0.235296 | -2.08745 | -4.24996 |
| Fbxl7   | NM_176959    | 0.001904 | -7.26747 | 4.8397  | 6.92903 | 0.23499  | -2.08933 | -4.2555  |
| Larp6   | NM_026235    | 0.001046 | -8.51053 | 4.9455  | 7.03549 | 0.234882 | -2.08999 | -4.25745 |
| B3galtl | NM_001081204 | 0.000272 | -12.0524 | 4.29635 | 6.38859 | 0.234516 | -2.09224 | -4.2641  |
| Capn6   | NM_007603    | 0.000292 | -11.838  | 5.90621 | 8.00003 | 0.234259 | -2.09382 | -4.26877 |
| Airn    | NR_002853    | 0.000169 | -13.6069 | 3.68664 | 5.78217 | 0.233982 | -2.09553 | -4.27383 |
| Fkbp11  | NM_024169    | 0.000581 | -9.91489 | 5.01065 | 7.11138 | 0.23314  | -2.10073 | -4.28927 |
| Fam84a  | NM_029007    | 0.004385 | -5.80366 | 4.37551 | 6.48063 | 0.232431 | -2.10513 | -4.30235 |
| Irx2    | NM_010574    | 1.75E-05 | -24.1148 | 6.00416 | 8.11333 | 0.231781 | -2.10917 | -4.31442 |
| Rhod    | NM_007485    | 5.41E-07 | -57.6867 | 5.26281 | 7.37433 | 0.231402 | -2.11153 | -4.32148 |
| Dhx40   | NM_026191    | 0.000197 | -13.0902 | 5.6148  | 7.72751 | 0.231212 | -2.11271 | -4.32504 |
| Tnxb    | NM_031176    | 2.52E-05 | -22.0122 | 5.28839 | 7.40418 | 0.23072  | -2.11578 | -4.33425 |
| Arhgef5 | NM_133674    | 3.92E-05 | -19.6965 | 4.71048 | 6.82784 | 0.230468 | -2.11736 | -4.339   |
| Jam3    | NM_023277    | 0.000354 | -11.2623 | 5.93662 | 8.06212 | 0.229171 | -2.1255  | -4.36355 |

|               |              |          |          |         |         |          |          |          |
|---------------|--------------|----------|----------|---------|---------|----------|----------|----------|
| Gm10406       | NM_001164727 | 0.00199  | -7.18273 | 4.17421 | 6.30143 | 0.228898 | -2.12722 | -4.36875 |
| Gm2897        | NM_001177714 | 0.00112  | -8.35968 | 3.46955 | 5.59752 | 0.228779 | -2.12797 | -4.37102 |
| Gm2897        | NM_001177714 | 0.00112  | -8.35968 | 3.46955 | 5.59752 | 0.228779 | -2.12797 | -4.37102 |
| Osr2          | NM_054049    | 0.000576 | -9.93672 | 5.15343 | 7.28222 | 0.22865  | -2.12879 | -4.37351 |
| Gm3002        | NR_033388    | 0.000814 | -9.08413 | 3.88863 | 6.01841 | 0.228493 | -2.12978 | -4.3765  |
| Peli2         | NM_033602    | 7.56E-05 | -16.6845 | 5.28359 | 7.4146  | 0.228297 | -2.13101 | -4.38025 |
| Adcy3         | NM_001159537 | 0.000258 | -12.2139 | 4.89265 | 7.026   | 0.227927 | -2.13335 | -4.38737 |
| Pnp           | NM_013632    | 5.47E-05 | -18.1056 | 8.03239 | 10.1662 | 0.22785  | -2.13384 | -4.38885 |
| C2            | NM_013484    | 0.001216 | -8.18013 | 4.28921 | 6.42847 | 0.226996 | -2.13926 | -4.40537 |
| 2210016F16Rik | NM_027335    | 2.54E-05 | -21.9688 | 5.49765 | 7.65015 | 0.224922 | -2.1525  | -4.44598 |
| Itgbl1        | NM_145467    | 0.000263 | -12.157  | 4.70219 | 6.85644 | 0.22465  | -2.15425 | -4.45136 |
| Pcdhb19       | NM_053144    | 0.001174 | -8.25699 | 4.0453  | 6.19986 | 0.224601 | -2.15456 | -4.45234 |
| Psrc1         | NM_019976    | 0.003436 | -6.20261 | 5.16408 | 7.32074 | 0.224276 | -2.15665 | -4.45879 |
| Ggta1         | NM_010283    | 0.000218 | -12.7557 | 5.61159 | 7.76853 | 0.224231 | -2.15694 | -4.45969 |
| Gm3002        | NR_033388    | 0.000761 | -9.24497 | 3.62484 | 5.78248 | 0.224122 | -2.15764 | -4.46185 |
| Gpr176        | NM_201367    | 0.004916 | -5.62379 | 4.69999 | 6.86678 | 0.222705 | -2.16679 | -4.49024 |
| Slc39a8       | NM_001135149 | 0.000271 | -12.0634 | 4.15692 | 6.32579 | 0.222385 | -2.16887 | -4.4967  |
| Gpr124        | NM_054044    | 4.30E-05 | -19.2407 | 6.62609 | 8.79774 | 0.221957 | -2.17165 | -4.50538 |
| Rgs16         | NM_011267    | 0.002868 | -6.51345 | 6.4672  | 8.64367 | 0.221216 | -2.17647 | -4.52047 |
| Tmem173       | NM_028261    | 0.004277 | -5.84317 | 7.13105 | 9.30761 | 0.221203 | -2.17656 | -4.52074 |
| Pdgfc         | NM_019971    | 0.000255 | -12.2541 | 5.93544 | 8.11442 | 0.220831 | -2.17899 | -4.52836 |
| Eid2          | NM_198425    | 0.000188 | -13.2478 | 4.92897 | 7.11426 | 0.219868 | -2.18529 | -4.54818 |
| Chic1         | NM_009767    | 1.16E-05 | -26.7693 | 3.43268 | 5.61984 | 0.219584 | -2.18715 | -4.55406 |
| Gm10406       | NM_001164727 | 0.001443 | -7.82068 | 4.18251 | 6.37048 | 0.219461 | -2.18796 | -4.55662 |
| Ctla2a        | NM_007796    | 0.002374 | -6.85234 | 5.71106 | 7.90006 | 0.219303 | -2.189   | -4.55991 |
| Agtr2         | NM_007429    | 6.50E-05 | -17.3357 | 4.12271 | 6.31251 | 0.219181 | -2.1898  | -4.56243 |
| H2afy2        | NM_207000    | 0.000152 | -13.9783 | 4.18168 | 6.37155 | 0.21917  | -2.18988 | -4.56266 |
| Mmd           | NM_026178    | 0.002313 | -6.90062 | 8.21684 | 10.4071 | 0.219118 | -2.19022 | -4.56376 |
| Gpr137b       | NM_031999    | 0.000262 | -12.1641 | 6.57227 | 8.78637 | 0.215522 | -2.2141  | -4.6399  |
| Gm3002        | NR_033388    | 0.001631 | -7.57168 | 3.63563 | 5.85015 | 0.215458 | -2.21452 | -4.64127 |
| Smox          | NM_001177833 | 0.000139 | -14.3048 | 5.79662 | 8.01185 | 0.215351 | -2.21524 | -4.64357 |

|           |              |          |          |         |         |          |          |          |
|-----------|--------------|----------|----------|---------|---------|----------|----------|----------|
| Galm      | NM_176963    | 0.002516 | -6.74649 | 4.37559 | 6.59639 | 0.214523 | -2.2208  | -4.66151 |
| Hoxc5     | NM_175730    | 0.001553 | -7.66995 | 4.49912 | 6.7208  | 0.214392 | -2.22168 | -4.66435 |
| Sash1     | NM_175155    | 2.22E-05 | -22.7152 | 6.85942 | 9.08292 | 0.214122 | -2.22349 | -4.67023 |
| Adam19    | NM_009616    | 0.000576 | -9.93575 | 5.47474 | 7.69982 | 0.213887 | -2.22508 | -4.67537 |
| Man2a1    | NM_008549    | 3.24E-05 | -20.6673 | 7.47791 | 9.70673 | 0.213333 | -2.22882 | -4.6875  |
| Gucy1a2   | NM_001033322 | 0.000926 | -8.78425 | 3.46893 | 5.69827 | 0.213256 | -2.22934 | -4.6892  |
| Spp1      | NM_009263    | 0.004264 | -5.84808 | 9.50799 | 11.7539 | 0.210819 | -2.24592 | -4.74341 |
| Tgfb3     | NM_011578    | 0.000454 | -10.5632 | 8.26804 | 10.5212 | 0.209769 | -2.25312 | -4.76714 |
| Dkk2      | NM_020265    | 0.001834 | -7.34038 | 4.40231 | 6.65802 | 0.209394 | -2.25571 | -4.77569 |
| Trp53inp1 | NM_021897    | 0.000713 | -9.40106 | 7.96354 | 10.2256 | 0.208471 | -2.26208 | -4.79684 |
| Ptgr1     | NM_025968    | 0.000617 | -9.76347 | 5.87923 | 8.14328 | 0.208186 | -2.26405 | -4.80339 |
| Figf      | NM_010216    | 0.002763 | -6.57891 | 7.43444 | 9.69879 | 0.208144 | -2.26435 | -4.80437 |
| Man1a     | NM_008548    | 0.000306 | -11.6895 | 7.07194 | 9.34011 | 0.207593 | -2.26817 | -4.81712 |
| Sema3a    | NM_009152    | 9.71E-05 | -15.6625 | 7.06649 | 9.33672 | 0.207296 | -2.27023 | -4.82401 |
| Rab3il1   | NM_144538    | 0.0012   | -8.20958 | 5.53041 | 7.80264 | 0.207009 | -2.27224 | -4.83071 |
| Slco2a1   | NM_033314    | 0.004121 | -5.90309 | 5.34688 | 7.62275 | 0.206489 | -2.27587 | -4.84288 |
| Unc93b1   | NM_019449    | 0.004266 | -5.84763 | 4.43277 | 6.71031 | 0.20625  | -2.27754 | -4.8485  |
| Hspb1     | NM_013560    | 0.00011  | -15.1805 | 5.1782  | 7.45976 | 0.205677 | -2.28155 | -4.862   |
| Pappa     | NM_021362    | 0.001225 | -8.16537 | 4.1901  | 6.4742  | 0.205312 | -2.28411 | -4.87063 |
| Mir300    | NR_029651    | 0.000136 | -14.3734 | 3.00632 | 5.30184 | 0.203695 | -2.29552 | -4.9093  |
| Nfia      | NM_010905    | 0.00034  | -11.3829 | 5.9083  | 8.20887 | 0.202982 | -2.30058 | -4.92654 |
| Pla2r1    | NM_008867    | 0.002967 | -6.45399 | 4.40956 | 6.71943 | 0.201679 | -2.30987 | -4.95838 |
| Tnfsf13b  | NM_033622    | 0.00109  | -8.41771 | 4.38922 | 6.69942 | 0.201632 | -2.31021 | -4.95954 |
| Tll1      | NM_009390    | 0.000238 | -12.4638 | 3.66135 | 5.98336 | 0.199988 | -2.32202 | -5.0003  |
| Gm13139   | NM_001083918 | 5.65E-05 | -17.9584 | 5.58871 | 7.9111  | 0.199937 | -2.32238 | -5.00158 |
| Folh1     | NM_016770    | 1.43E-05 | -25.3862 | 4.1425  | 6.46552 | 0.199849 | -2.32302 | -5.00378 |
| Glt8d2    | NM_029102    | 3.85E-05 | -19.781  | 4.44439 | 6.76853 | 0.199694 | -2.32414 | -5.00767 |
| Prickle1  | NM_001033217 | 1.54E-05 | -24.9226 | 4.85614 | 7.18463 | 0.199092 | -2.3285  | -5.02281 |
| Hspb1     | NM_013560    | 0.000187 | -13.2626 | 5.13204 | 7.46744 | 0.198141 | -2.3354  | -5.04691 |
| Gm3002    | NR_033388    | 0.002524 | -6.74089 | 3.69907 | 6.03502 | 0.198065 | -2.33596 | -5.04885 |
| Adhfe1    | NM_175236    | 0.001312 | -8.01845 | 4.66148 | 6.9982  | 0.19796  | -2.33672 | -5.05153 |



|               |              |          |          |         |         |          |          |          |
|---------------|--------------|----------|----------|---------|---------|----------|----------|----------|
| Cxx1c         | NM_028375    | 0.000558 | -10.0191 | 5.68598 | 8.02286 | 0.197938 | -2.33688 | -5.0521  |
| Gstm5         | NM_010360    | 0.002013 | -7.161   | 6.08939 | 8.43257 | 0.197075 | -2.34318 | -5.0742  |
| Cpz           | NM_153107    | 0.003166 | -6.34191 | 5.15271 | 7.49877 | 0.196682 | -2.34606 | -5.08434 |
| Cd1d1         | NM_007639    | 0.000805 | -9.11088 | 5.84627 | 8.19412 | 0.196439 | -2.34785 | -5.09064 |
| Kank1         | NM_181404    | 6.88E-06 | -30.5016 | 4.69756 | 7.05827 | 0.194696 | -2.36071 | -5.13622 |
| Col6a1        | NM_009933    | 0.000114 | -15.0417 | 8.42222 | 10.7868 | 0.194174 | -2.36458 | -5.15002 |
| Osr1          | NM_011859    | 6.65E-05 | -17.2332 | 4.49094 | 6.85615 | 0.194088 | -2.36521 | -5.15229 |
| Papss2        | NM_011864    | 4.53E-05 | -18.9922 | 4.18217 | 6.55331 | 0.193293 | -2.37114 | -5.17349 |
| Gm3002        | NR_033388    | 0.001307 | -8.02695 | 3.58182 | 5.95465 | 0.193066 | -2.37284 | -5.17958 |
| Slc39a14      | NM_001135151 | 0.001818 | -7.35735 | 7.5839  | 9.95794 | 0.192905 | -2.37404 | -5.1839  |
| Tnfaip6       | NM_009398    | 0.001652 | -7.54651 | 5.86595 | 8.24107 | 0.192762 | -2.37511 | -5.18775 |
| 2810055F11Rik | NM_026038    | 0.000127 | -14.6152 | 4.29341 | 6.68452 | 0.190636 | -2.39111 | -5.24561 |
| Cmtm7         | NM_133978    | 6.16E-05 | -17.5697 | 4.63786 | 7.03064 | 0.190414 | -2.39279 | -5.2517  |
| Shc2          | NM_001024539 | 0.000995 | -8.62105 | 4.35033 | 6.74956 | 0.189566 | -2.39923 | -5.27521 |
| Nqo1          | NM_008706    | 2.55E-05 | -21.9461 | 4.59376 | 6.99536 | 0.189255 | -2.40159 | -5.28386 |
| Gm3002        | NR_033388    | 0.001529 | -7.70208 | 3.53021 | 5.93279 | 0.189125 | -2.40258 | -5.2875  |
| F3            | NM_010171    | 0.000733 | -9.33565 | 7.94232 | 10.3496 | 0.188515 | -2.40725 | -5.30462 |
| Spats2l       | NM_144882    | 3.01E-05 | -21.043  | 5.19184 | 7.60416 | 0.187854 | -2.41232 | -5.32329 |
| Procr         | NM_011171    | 0.004307 | -5.83216 | 4.38998 | 6.80616 | 0.187352 | -2.41618 | -5.33756 |
| Lrrn4cl       | NM_001013019 | 0.000384 | -11.0301 | 5.76665 | 8.1887  | 0.186591 | -2.42205 | -5.35931 |
| Fam26e        | NM_178908    | 0.002036 | -7.13965 | 5.03553 | 7.469   | 0.185119 | -2.43347 | -5.40192 |
| Abhd6         | NM_025341    | 1.14E-05 | -26.8683 | 5.00773 | 7.44568 | 0.184547 | -2.43794 | -5.41869 |
| Negr1         | NM_001039094 | 0.001319 | -8.00788 | 5.26717 | 7.70583 | 0.184455 | -2.43866 | -5.42138 |
| Gsdmd         | NM_026960    | 0.000149 | -14.0574 | 4.5357  | 6.9782  | 0.183964 | -2.44251 | -5.43585 |
| Mid1          | NM_010797    | 0.000689 | -9.4869  | 5.88182 | 8.33267 | 0.182903 | -2.45085 | -5.46739 |
| Gstm4         | NM_026764    | 9.81E-05 | -15.6192 | 4.87782 | 7.3397  | 0.18151  | -2.46188 | -5.50934 |
| Tgfb2         | NM_009367    | 0.001666 | -7.52962 | 4.62623 | 7.1054  | 0.179348 | -2.47917 | -5.57576 |
| Anpep         | NM_008486    | 0.003379 | -6.23093 | 4.33197 | 6.81803 | 0.178493 | -2.48606 | -5.60246 |
| Gm3002        | NR_033388    | 0.000518 | -10.211  | 3.81705 | 6.30641 | 0.178086 | -2.48936 | -5.61527 |
| Ror2          | NM_013846    | 0.000405 | -10.8817 | 5.60006 | 8.10088 | 0.176677 | -2.50081 | -5.66005 |
| Bhlhb9        | NM_198161    | 0.000217 | -12.7725 | 3.53071 | 6.03171 | 0.176654 | -2.501   | -5.66078 |

|           |              |          |          |         |         |          |          |          |
|-----------|--------------|----------|----------|---------|---------|----------|----------|----------|
| Has1      | NM_008215    | 0.005376 | -5.48636 | 4.86783 | 7.37315 | 0.176126 | -2.50532 | -5.67775 |
| Abca8b    | NM_013851    | 0.001441 | -7.82405 | 3.50019 | 6.01139 | 0.17541  | -2.5112  | -5.70092 |
| Grb14     | NM_016719    | 0.000831 | -9.03693 | 4.67487 | 7.19196 | 0.174696 | -2.51708 | -5.72424 |
| Hvcn1     | NM_001042489 | 7.57E-05 | -16.6803 | 4.00978 | 6.52917 | 0.174416 | -2.5194  | -5.73342 |
| Col12a1   | NM_007730    | 0.000884 | -8.89052 | 5.91931 | 8.44443 | 0.173726 | -2.52511 | -5.75619 |
| Cygb      | NM_030206    | 8.19E-05 | -16.3481 | 6.59011 | 9.14383 | 0.170315 | -2.55372 | -5.87148 |
|           | ---          | 0.000182 | -13.358  | 4.82036 | 7.37671 | 0.170005 | -2.55635 | -5.88217 |
| Mtmr11    | NM_181409    | 5.05E-05 | -18.4777 | 5.68546 | 8.24589 | 0.169525 | -2.56043 | -5.89882 |
| Egln3     | NM_028133    | 9.10E-05 | -15.9192 | 3.8392  | 6.40392 | 0.169022 | -2.56472 | -5.91639 |
| Birc3     | NM_007464    | 0.000215 | -12.7891 | 4.81985 | 7.38625 | 0.168825 | -2.5664  | -5.92329 |
| Gm3696    | NM_001024712 | 0.000939 | -8.75195 | 3.77718 | 6.34507 | 0.168651 | -2.56789 | -5.92941 |
| Snai1     | NM_011427    | 0.000145 | -14.1551 | 5.70456 | 8.27511 | 0.16834  | -2.57055 | -5.94037 |
| Nynrin    | NM_001040072 | 2.86E-05 | -21.3324 | 4.56174 | 7.13663 | 0.167834 | -2.57489 | -5.95827 |
| Lyn       | NM_001111096 | 0.002124 | -7.05883 | 4.1698  | 6.74809 | 0.167439 | -2.57829 | -5.97231 |
| Fam110c   | NM_027828    | 0.000285 | -11.903  | 4.26856 | 6.85177 | 0.16687  | -2.5832  | -5.99269 |
| Timp1     | NM_001044384 | 0.001329 | -7.99165 | 8.87147 | 11.4591 | 0.166358 | -2.58763 | -6.01112 |
| Tnfrsf23  | NM_024290    | 0.001918 | -7.25363 | 6.20218 | 8.79768 | 0.165454 | -2.5955  | -6.04398 |
| Gas1      | NM_008086    | 0.00025  | -12.3105 | 8.37085 | 10.9664 | 0.165452 | -2.59551 | -6.04403 |
| Ppap2a    | NM_008247    | 0.001621 | -7.5841  | 7.6787  | 10.2771 | 0.165119 | -2.59842 | -6.05624 |
| S100a1    | NM_011309    | 0.000182 | -13.3582 | 4.6585  | 7.2575  | 0.165053 | -2.599   | -6.05866 |
| Fam115c   | BC011487     | 7.68E-06 | -29.6762 | 3.97169 | 6.58431 | 0.163502 | -2.61262 | -6.11613 |
| Eif4g3    | NM_172703    | 1.46E-05 | -25.25   | 4.8122  | 7.43002 | 0.162914 | -2.61782 | -6.13821 |
| Tnfrsf10b | NM_020275    | 0.00172  | -7.46582 | 4.26334 | 6.88161 | 0.162863 | -2.61827 | -6.14013 |
| Zfp521    | NM_145492    | 0.000155 | -13.9066 | 6.03219 | 8.65782 | 0.162034 | -2.62563 | -6.17153 |
| Tpm2      | NM_009416    | 0.00067  | -9.55456 | 5.07107 | 7.70007 | 0.161656 | -2.629   | -6.18599 |
| B3gnt9-ps | NM_178879    | 0.000112 | -15.0931 | 5.86864 | 8.49947 | 0.161451 | -2.63083 | -6.19381 |
| Unc5c     | NM_009472    | 0.000194 | -13.1383 | 5.49048 | 8.1269  | 0.160827 | -2.63642 | -6.21786 |
| Fstl1     | NM_008047    | 2.39E-05 | -22.3209 | 9.31649 | 11.9529 | 0.160824 | -2.63644 | -6.21797 |
| Ccdc122   | NM_175369    | 0.000111 | -15.1271 | 2.9098  | 5.56414 | 0.158841 | -2.65434 | -6.29559 |
| Cyp2d22   | NM_001163472 | 0.000117 | -14.9525 | 5.21712 | 7.87401 | 0.15856  | -2.6569  | -6.30675 |
| Nid2      | NM_008695    | 0.000342 | -11.3656 | 5.34894 | 8.00726 | 0.158403 | -2.65832 | -6.313   |

|               |              |          |          |         |         |          |          |          |
|---------------|--------------|----------|----------|---------|---------|----------|----------|----------|
| Nfia          | NM_001122952 | 0.000142 | -14.2207 | 5.19869 | 7.86137 | 0.157926 | -2.66268 | -6.33208 |
| Cgnl1         | NM_026599    | 0.00013  | -14.5424 | 4.95069 | 7.61401 | 0.157855 | -2.66332 | -6.33491 |
| Rasl11b       | NM_026878    | 0.000113 | -15.0663 | 5.54426 | 8.20803 | 0.157806 | -2.66377 | -6.33688 |
| Trim12a       | NM_023835    | 7.11E-05 | -16.9451 | 3.65238 | 6.32232 | 0.157133 | -2.66994 | -6.36402 |
| S1pr1         | NM_007901    | 0.003459 | -6.19164 | 4.79927 | 7.47293 | 0.156728 | -2.67367 | -6.38049 |
| Rarres2       | NM_027852    | 0.003904 | -5.99115 | 4.8759  | 7.5554  | 0.156096 | -2.6795  | -6.40632 |
| Pdgfd         | NM_027924    | 9.95E-05 | -15.5639 | 3.53687 | 6.21782 | 0.155938 | -2.68095 | -6.41279 |
| Taf9b         | NM_001167988 | 0.000363 | -11.1942 | 3.61359 | 6.30064 | 0.155281 | -2.68704 | -6.43992 |
| Tbc1d2b       | NM_194334    | 9.60E-05 | -15.7066 | 6.43535 | 9.13287 | 0.154158 | -2.69752 | -6.48685 |
| Ppp1r3c       | NM_016854    | 0.000829 | -9.04158 | 3.74588 | 6.446   | 0.153879 | -2.70013 | -6.4986  |
| Fmo1          | NM_010231    | 0.000401 | -10.9104 | 4.92277 | 7.62628 | 0.153519 | -2.70351 | -6.51383 |
| Dbc1          | NM_019967    | 0.000324 | -11.5222 | 4.68297 | 7.38809 | 0.153348 | -2.70512 | -6.52111 |
| Boc           | NM_172506    | 0.000899 | -8.85177 | 4.45148 | 7.16108 | 0.152872 | -2.7096  | -6.54141 |
| Nsd1          | NM_008739    | 0.000663 | -9.58225 | 4.82159 | 7.53128 | 0.152863 | -2.70969 | -6.54181 |
| Cyp2f2        | NM_007817    | 0.000549 | -10.0615 | 4.92067 | 7.63089 | 0.152807 | -2.71022 | -6.54421 |
| 9930013L23Rik | NM_030728    | 0.001811 | -7.36437 | 4.56262 | 7.2981  | 0.150154 | -2.73548 | -6.65982 |
| Top1mt        | NM_028404    | 2.20E-05 | -22.7784 | 4.58317 | 7.31992 | 0.150022 | -2.73675 | -6.66567 |
| Cbr1          | NM_007620    | 0.00028  | -11.9649 | 5.51377 | 8.27045 | 0.147964 | -2.75668 | -6.7584  |
| Cd24a         | NM_009846    | 0.003767 | -6.04975 | 3.50993 | 6.27428 | 0.14718  | -2.76435 | -6.79442 |
| Smpdl3a       | NM_020561    | 0.000788 | -9.16082 | 3.91725 | 6.69169 | 0.146154 | -2.77444 | -6.8421  |
| Ano3          | NM_001128103 | 0.004117 | -5.90447 | 2.93264 | 5.7162  | 0.145233 | -2.78356 | -6.88549 |
| Ophn1         | NM_052976    | 6.39E-06 | -31.0758 | 4.45402 | 7.2401  | 0.14498  | -2.78607 | -6.89749 |
| Stc1          | NM_009285    | 0.001038 | -8.52692 | 4.65042 | 7.43887 | 0.144741 | -2.78845 | -6.90889 |
| Fap           | NM_007986    | 0.002071 | -7.10658 | 3.25277 | 6.04627 | 0.144236 | -2.7935  | -6.93309 |
| Mmp19         | NM_021412    | 0.000276 | -11.9992 | 7.89812 | 10.6946 | 0.143936 | -2.7965  | -6.94753 |
| Slc16a3       | NM_001038653 | 0.00103  | -8.54486 | 5.56573 | 8.36782 | 0.143379 | -2.80209 | -6.97451 |
| Isyna1        | NM_023627    | 0.002668 | -6.64155 | 5.87075 | 8.67554 | 0.143112 | -2.80479 | -6.98755 |
| Serping1      | NM_009776    | 0.0026   | -6.68744 | 6.25956 | 9.06514 | 0.143033 | -2.80558 | -6.99139 |
| Nynrin        | NM_001040072 | 0.000152 | -13.9872 | 5.21871 | 8.02546 | 0.142918 | -2.80674 | -6.99703 |
| Gm3002        | NR_033388    | 0.001424 | -7.8481  | 3.34123 | 6.15189 | 0.14253  | -2.81066 | -7.01608 |
| lah1          | NM_026347    | 0.000374 | -11.1058 | 5.93749 | 8.75032 | 0.142316 | -2.81283 | -7.02663 |

|         |              |          |          |         |         |          |          |          |
|---------|--------------|----------|----------|---------|---------|----------|----------|----------|
| Xlr3b   | NM_001081643 | 0.000297 | -11.7838 | 3.19064 | 6.0119  | 0.141487 | -2.82126 | -7.0678  |
| P4ha3   | NM_177161    | 0.001396 | -7.88868 | 4.42448 | 7.24776 | 0.141288 | -2.82329 | -7.07772 |
| Ism1    | NM_001126490 | 0.002306 | -6.90628 | 5.14618 | 7.97186 | 0.141055 | -2.82567 | -7.08944 |
| Runx1t1 | NM_001111027 | 0.00066  | -9.59247 | 4.16315 | 6.99114 | 0.140829 | -2.82799 | -7.10083 |
| Ctsf    | NM_019861    | 0.000697 | -9.45774 | 4.86226 | 7.69649 | 0.140221 | -2.83423 | -7.13161 |
| Ppap2b  | NM_080555    | 6.61E-05 | -17.261  | 8.73608 | 11.5746 | 0.1398   | -2.83856 | -7.15306 |
| Eda2r   | NM_001161432 | 0.000675 | -9.53768 | 5.8377  | 8.68432 | 0.139021 | -2.84662 | -7.19314 |
| Adam23  | NM_011780    | 2.62E-05 | -21.7944 | 3.9796  | 6.84199 | 0.137511 | -2.86239 | -7.27217 |
| Crabp1  | NM_013496    | 7.29E-06 | -30.0651 | 5.29941 | 8.16415 | 0.137287 | -2.86474 | -7.28403 |
| Tceal1  | NM_146236    | 0.000141 | -14.2559 | 3.05411 | 5.91998 | 0.137179 | -2.86587 | -7.28976 |
| Ace     | NM_207624    | 0.000501 | -10.299  | 4.64612 | 7.52181 | 0.136248 | -2.87569 | -7.33955 |
| Plekhh2 | NM_177606    | 0.000122 | -14.7817 | 4.26789 | 7.1501  | 0.135634 | -2.88221 | -7.37278 |
| Dhrs3   | NM_011303    | 0.000283 | -11.9321 | 5.40979 | 8.29405 | 0.135441 | -2.88427 | -7.38331 |
| Cbr3    | NM_173047    | 8.56E-05 | -16.1674 | 4.17255 | 7.06002 | 0.13514  | -2.88747 | -7.39971 |
| Plekha2 | NM_031257    | 5.47E-06 | -32.3172 | 5.45477 | 8.3436  | 0.135013 | -2.88883 | -7.4067  |
| Kcnab1  | NM_010597    | 0.001327 | -7.99515 | 4.8975  | 7.7869  | 0.13496  | -2.8894  | -7.40961 |
| Egfl6   | NM_019397    | 0.002972 | -6.45119 | 3.8099  | 6.70136 | 0.134768 | -2.89145 | -7.42018 |
| Fgf10   | NM_008002    | 0.000323 | -11.5356 | 4.24637 | 7.14098 | 0.134473 | -2.89461 | -7.43645 |
| Col6a3  | AF064749     | 0.000399 | -10.926  | 7.99092 | 10.8876 | 0.13428  | -2.89669 | -7.44715 |
|         | ---          | 0.000219 | -12.7351 | 3.01397 | 5.9132  | 0.134043 | -2.89923 | -7.46028 |
| Gm3002  | NR_033388    | 0.001831 | -7.34354 | 4.41762 | 7.32156 | 0.133606 | -2.90394 | -7.48468 |
| Trim25  | NM_009546    | 8.62E-07 | -51.3246 | 3.8125  | 6.71668 | 0.133584 | -2.90418 | -7.48592 |
| Abca9   | NM_147220    | 0.000364 | -11.1805 | 4.14659 | 7.05546 | 0.133151 | -2.90887 | -7.5103  |
| Htatif2 | NM_001146049 | 5.09E-05 | -18.4359 | 5.08108 | 8.00277 | 0.131972 | -2.92169 | -7.57734 |
| Hoxd8   | NM_008276    | 8.81E-05 | -16.0496 | 3.75971 | 6.68383 | 0.13175  | -2.92413 | -7.59015 |
| Dab2    | NM_023118    | 0.000186 | -13.2679 | 7.21491 | 10.1436 | 0.131337 | -2.92865 | -7.61398 |
|         | ---          | 0.000135 | -14.4179 | 3.40088 | 6.32982 | 0.131311 | -2.92895 | -7.61553 |
| Aox3    | NM_023617    | 0.003635 | -6.10887 | 5.34344 | 8.28388 | 0.130268 | -2.94044 | -7.67647 |
| Ndrp2   | NM_013864    | 0.000343 | -11.3588 | 4.93784 | 7.88684 | 0.129498 | -2.94899 | -7.7221  |
| Dact1   | NM_001190466 | 8.97E-05 | -15.977  | 3.85114 | 6.80234 | 0.1293   | -2.95121 | -7.73395 |
| Enpep   | NM_007934    | 0.000744 | -9.2994  | 4.30961 | 7.29141 | 0.126587 | -2.9818  | -7.8997  |

|               |                        |          |          |         |         |          |          |          |
|---------------|------------------------|----------|----------|---------|---------|----------|----------|----------|
| Echdc2        | NM_026728              | 0.000272 | -12.0537 | 4.86641 | 7.8494  | 0.126482 | -2.983   | -7.90626 |
| Chic1         | NM_009767              | 9.18E-06 | -28.3764 | 3.61306 | 6.60224 | 0.125941 | -2.98918 | -7.9402  |
| Mark1         | NM_145515              | 1.04E-05 | -27.471  | 4.45567 | 7.46224 | 0.124432 | -3.00658 | -8.03655 |
| Adamts1       | NM_009621              | 0.001618 | -7.58793 | 8.00885 | 11.0219 | 0.12387  | -3.0131  | -8.07295 |
| Lphn2         | NM_001081298           | 0.000409 | -10.8504 | 4.63592 | 7.65278 | 0.123547 | -3.01686 | -8.09406 |
| Manba         | NM_027288              | 7.26E-05 | -16.8576 | 5.31428 | 8.3341  | 0.123294 | -3.01982 | -8.11067 |
| Mir382        | NR_029883              | 0.000168 | -13.6288 | 2.9204  | 5.96235 | 0.121418 | -3.04195 | -8.23601 |
| Fam49a        | NM_029758              | 0.000484 | -10.3939 | 3.62044 | 6.66782 | 0.120961 | -3.04738 | -8.26711 |
| Pde1a         | NM_016744              | 4.91E-05 | -18.6121 | 4.71852 | 7.76717 | 0.120855 | -3.04865 | -8.27437 |
| B3galnt1      | NM_020026              | 0.000581 | -9.91253 | 4.00898 | 7.05871 | 0.120764 | -3.04974 | -8.28061 |
| Hoxc4         | NM_013553              | 0.000394 | -10.9573 | 4.64059 | 7.69502 | 0.120372 | -3.05442 | -8.30756 |
| Lphn2         | NM_001081298           | 0.0001   | -15.5327 | 3.83563 | 6.89578 | 0.119896 | -3.06015 | -8.34059 |
| St3gal1       | NM_009177              | 4.91E-05 | -18.607  | 6.82574 | 9.89119 | 0.119456 | -3.06545 | -8.37128 |
| Nynrin        | NM_001040072           | 0.0002   | -13.0338 | 4.56671 | 7.63277 | 0.119405 | -3.06606 | -8.37486 |
| Vcam1         | NM_011693              | 9.10E-05 | -15.9217 | 8.32775 | 11.4057 | 0.118427 | -3.07793 | -8.44405 |
| Ccnb1ip1      | NM_001111119           | 5.21E-05 | -18.3291 | 4.20406 | 7.29655 | 0.117238 | -3.09249 | -8.52967 |
| C530030P08Rik | ENSMUST0000010138<br>1 | 0.000133 | -14.4479 | 5.07095 | 8.16585 | 0.117042 | -3.09491 | -8.54397 |
| Ptgis         | NM_008968              | 5.14E-05 | -18.3932 | 5.68496 | 8.78468 | 0.116652 | -3.09972 | -8.57252 |
| Mafb          | NM_010658              | 0.000601 | -9.82608 | 4.77785 | 7.89945 | 0.114895 | -3.12161 | -8.70357 |
| Rpl39l        | NM_026594              | 0.000436 | -10.6744 | 3.55127 | 6.6744  | 0.114774 | -3.12313 | -8.71276 |
| Il11ra2       | NM_010550              | 3.55E-05 | -20.1882 | 5.63509 | 8.75836 | 0.114763 | -3.12327 | -8.71359 |
| Il11ra2       | NM_010550              | 3.55E-05 | -20.1882 | 5.63509 | 8.75836 | 0.114763 | -3.12327 | -8.71359 |
| Il1rap        | NM_008364              | 5.45E-05 | -18.1237 | 5.73117 | 8.86574 | 0.113867 | -3.13457 | -8.78214 |
| Calcr1        | NM_018782              | 0.00111  | -8.37813 | 5.41386 | 8.56922 | 0.112239 | -3.15536 | -8.90958 |
| Arsj          | NM_173451              | 6.15E-05 | -17.5756 | 4.66899 | 7.82507 | 0.112182 | -3.15608 | -8.91405 |
|               | ---                    | 3.90E-05 | -19.7173 | 5.08086 | 8.24158 | 0.111822 | -3.16072 | -8.94278 |
| Sema5a        | NM_009154              | 7.50E-05 | -16.7211 | 5.05845 | 8.22527 | 0.111351 | -3.16682 | -8.98064 |
| Myl9          | NM_172118              | 0.006339 | -5.24018 | 5.22348 | 8.41208 | 0.109682 | -3.1886  | -9.11724 |
| Fuca2         | NM_025799              | 0.000432 | -10.704  | 4.37916 | 7.5725  | 0.109323 | -3.19333 | -9.14722 |
| Nfatc4        | NM_023699              | 0.000231 | -12.5695 | 4.86552 | 8.06029 | 0.109214 | -3.19477 | -9.15635 |

|               |                        |          |          |         |         |          |          |          |
|---------------|------------------------|----------|----------|---------|---------|----------|----------|----------|
| Rbpms         | NM_019733              | 6.17E-05 | -17.5643 | 4.19255 | 7.39072 | 0.108957 | -3.19817 | -9.17795 |
| Rora          | NM_013646              | 0.000111 | -15.1329 | 4.07657 | 7.27702 | 0.108785 | -3.20045 | -9.19248 |
| Vav3          | NM_020505              | 0.001427 | -7.84334 | 4.0051  | 7.23554 | 0.106547 | -3.23044 | -9.38555 |
| Irak3         | NM_028679              | 9.38E-05 | -15.7996 | 3.94657 | 7.18001 | 0.106326 | -3.23343 | -9.40503 |
| Fam198b       | NM_133187              | 0.001976 | -7.19641 | 5.56048 | 8.80134 | 0.10578  | -3.24086 | -9.4536  |
| Kdm5d         | NM_011419              | 2.24E-05 | -22.6858 | 4.09336 | 7.33456 | 0.105755 | -3.2412  | -9.45583 |
| Tbx5          | NM_011537              | 2.82E-05 | -21.3935 | 3.91107 | 7.15813 | 0.105326 | -3.24706 | -9.49432 |
| Gsta4         | NM_010357              | 0.000526 | -10.1701 | 4.26313 | 7.51488 | 0.104985 | -3.25175 | -9.5252  |
| Mir410        | NR_029914              | 0.000102 | -15.4731 | 3.31626 | 6.58404 | 0.103824 | -3.26778 | -9.63164 |
| Finc          | NM_001081185           | 1.20E-05 | -26.5267 | 5.48065 | 8.76929 | 0.102334 | -3.28864 | -9.77189 |
| Adm           | NM_009627              | 0.000645 | -9.65016 | 4.26596 | 7.55635 | 0.102211 | -3.29038 | -9.78372 |
| Adam12        | NM_007400              | 0.000242 | -12.4179 | 4.79855 | 8.08912 | 0.102197 | -3.29057 | -9.78498 |
| Eya4          | NM_010167              | 5.71E-06 | -31.969  | 4.67825 | 7.99552 | 0.100323 | -3.31728 | -9.9678  |
| Epha7         | NM_010141              | 0.000213 | -12.8283 | 3.90819 | 7.23042 | 0.099979 | -3.32223 | -10.0021 |
| C530030P08Rik | ENSMUST0000010138<br>1 | 9.13E-05 | -15.9077 | 5.07886 | 8.40154 | 0.099948 | -3.32268 | -10.0052 |
| Ldb2          | NM_001077398           | 4.64E-05 | -18.8753 | 4.0152  | 7.34149 | 0.099698 | -3.32629 | -10.0303 |
| Col6a2        | NM_146007              | 0.00021  | -12.8704 | 6.52818 | 9.8565  | 0.099558 | -3.32832 | -10.0444 |
| Prl2c3        | NM_011118              | 0.000796 | -9.13614 | 3.73685 | 7.06966 | 0.099249 | -3.33281 | -10.0757 |
| Ggt5          | NM_011820              | 0.000111 | -15.1222 | 5.22224 | 8.55538 | 0.099226 | -3.33314 | -10.078  |
| Olr1          | NM_138648              | 0.002411 | -6.82417 | 3.94351 | 7.27882 | 0.099077 | -3.33531 | -10.0932 |
| Clec2d        | NM_053109              | 0.000407 | -10.8664 | 3.80356 | 7.14127 | 0.098912 | -3.33772 | -10.11   |
| Fads2         | NM_019699              | 4.71E-05 | -18.8044 | 5.14382 | 8.49734 | 0.097834 | -3.35352 | -10.2214 |
| Bdkrb1        | NM_007539              | 0.003125 | -6.36408 | 4.98921 | 8.35693 | 0.096876 | -3.36772 | -10.3225 |
| Fbln5         | NM_011812              | 4.73E-05 | -18.7846 | 5.3494  | 8.72164 | 0.096573 | -3.37224 | -10.3549 |
| Plxdc1        | NM_001163608           | 0.000641 | -9.66579 | 4.65887 | 8.04148 | 0.095881 | -3.38261 | -10.4296 |
| Lamb1         | NM_008482              | 1.52E-05 | -24.9926 | 7.34693 | 10.7357 | 0.095474 | -3.38874 | -10.474  |
| Tspan11       | NM_026743              | 0.000822 | -9.06064 | 5.1688  | 8.56014 | 0.095302 | -3.39134 | -10.4929 |
| Adh1          | NM_007409              | 9.95E-05 | -15.5633 | 7.15265 | 10.5482 | 0.095028 | -3.3955  | -10.5232 |
| Postn         | NM_015784              | 0.000219 | -12.729  | 8.90871 | 12.3049 | 0.094982 | -3.3962  | -10.5283 |
| Jam2          | NM_023844              | 0.000459 | -10.534  | 4.393   | 7.79125 | 0.094847 | -3.39825 | -10.5433 |

|            |              |          |          |         |         |          |          |          |
|------------|--------------|----------|----------|---------|---------|----------|----------|----------|
| Serpinf1   | NM_011340    | 4.86E-06 | -33.2803 | 8.15589 | 11.5605 | 0.09443  | -3.40461 | -10.5899 |
| Akap12     | NM_031185    | 0.001198 | -8.21335 | 5.23965 | 8.64468 | 0.094403 | -3.40503 | -10.5929 |
| Bmper      | NM_028472    | 0.000592 | -9.86507 | 6.61391 | 10.0347 | 0.093377 | -3.42079 | -10.7093 |
| Hsd11b1    | NM_008288    | 0.006801 | -5.13787 | 4.68929 | 8.11394 | 0.093128 | -3.42465 | -10.7379 |
| Plau       | NM_008873    | 0.000463 | -10.5151 | 4.00928 | 7.44137 | 0.092648 | -3.43209 | -10.7935 |
| Thbd       | NM_009378    | 1.98E-05 | -23.3809 | 4.85908 | 8.29462 | 0.092427 | -3.43554 | -10.8194 |
| Gata6      | NM_010258    | 0.000291 | -11.8415 | 4.83614 | 8.27269 | 0.092362 | -3.43656 | -10.827  |
| Il11ra1    | NM_001172054 | 8.59E-06 | -28.8496 | 5.54407 | 8.98854 | 0.091857 | -3.44447 | -10.8865 |
| Islr       | NM_012043    | 0.000321 | -11.5452 | 6.46524 | 9.92435 | 0.090929 | -3.45911 | -10.9976 |
| Mfap2      | NM_008546    | 1.09E-05 | -27.1942 | 5.97232 | 9.43389 | 0.090775 | -3.46156 | -11.0163 |
| Csgalnact1 | NM_172753    | 1.53E-05 | -24.9719 | 5.95178 | 9.41338 | 0.090773 | -3.4616  | -11.0165 |
| Setbp1     | NM_053099    | 0.00013  | -14.5439 | 4.70203 | 8.16581 | 0.090636 | -3.46378 | -11.0332 |
| Prl2c5     | NM_181852    | 0.000143 | -14.1917 | 3.75189 | 7.21601 | 0.090614 | -3.46412 | -11.0358 |
| Svep1      | NM_022814    | 0.000109 | -15.2007 | 4.65215 | 8.1318  | 0.089644 | -3.47965 | -11.1552 |
| Tmem100    | NM_026433    | 0.00085  | -8.98399 | 4.01885 | 7.50682 | 0.089129 | -3.48797 | -11.2197 |
| Galnt14    | NM_173739    | 1.43E-05 | -25.3835 | 4.44169 | 7.94162 | 0.088393 | -3.49992 | -11.3131 |
| Hs6st2     | NM_001077202 | 0.000297 | -11.7808 | 4.35546 | 7.87504 | 0.087197 | -3.51958 | -11.4683 |
| Htr2a      | NM_172812    | 0.000384 | -11.0317 | 4.37133 | 7.92319 | 0.085267 | -3.55186 | -11.7278 |
| Itga11     | NM_176922    | 1.84E-05 | -23.8363 | 4.6194  | 8.20938 | 0.083044 | -3.58997 | -12.0418 |
| Mrc2       | NM_008626    | 8.40E-05 | -16.2456 | 5.3918  | 8.98788 | 0.082694 | -3.59608 | -12.0928 |
| Gstk1      | NM_029555    | 4.13E-05 | -19.4383 | 3.70174 | 7.29901 | 0.082625 | -3.59727 | -12.1028 |
| Abca8a     | NM_153145    | 0.003199 | -6.32387 | 3.75796 | 7.35573 | 0.082597 | -3.59777 | -12.107  |
| H2-D1      | NM_010380    | 5.41E-05 | -18.1538 | 5.69361 | 9.3079  | 0.081656 | -3.61429 | -12.2465 |
| Prrx2      | NM_009116    | 3.79E-05 | -19.8678 | 5.49448 | 9.11401 | 0.08136  | -3.61953 | -12.291  |
|            | ---          | 9.16E-05 | -15.8948 | 4.03275 | 7.65739 | 0.081073 | -3.62464 | -12.3346 |
|            | ---          | 0.000198 | -13.0696 | 4.48982 | 8.11695 | 0.080933 | -3.62714 | -12.356  |
| Spon2      | NM_133903    | 0.000626 | -9.7236  | 6.98726 | 10.6226 | 0.080473 | -3.63535 | -12.4265 |
| Emilin2    | NM_145158    | 2.07E-05 | -23.1323 | 4.68668 | 8.33549 | 0.079726 | -3.64881 | -12.543  |
| Rerg       | NM_181988    | 0.000735 | -9.32733 | 4.44315 | 8.0974  | 0.079426 | -3.65425 | -12.5904 |
| Olfml3     | NM_133859    | 7.69E-07 | -52.8261 | 7.42628 | 11.0885 | 0.078989 | -3.6622  | -12.6599 |
| Ppap2c     | NM_015817    | 0.000186 | -13.276  | 4.96723 | 8.63891 | 0.078472 | -3.67168 | -12.7434 |

|               |              |          |          |         |         |          |          |          |
|---------------|--------------|----------|----------|---------|---------|----------|----------|----------|
| Lgals3        | NM_001145953 | 1.09E-06 | -48.4171 | 5.58926 | 9.2705  | 0.077954 | -3.68124 | -12.8281 |
| Cd248         | NM_054042    | 5.13E-05 | -18.3998 | 5.41462 | 9.10427 | 0.077501 | -3.68965 | -12.9031 |
| Cd97          | NM_011925    | 0.001098 | -8.40174 | 4.47661 | 8.17215 | 0.077185 | -3.69554 | -12.9559 |
| 6330406115Rik | BC116246     | 0.001007 | -8.59414 | 4.16239 | 7.86685 | 0.076709 | -3.70447 | -13.0363 |
| Igfbp6        | NM_008344    | 9.45E-05 | -15.7668 | 7.24247 | 10.9504 | 0.076523 | -3.70797 | -13.068  |
| Itga8         | NM_001001309 | 0.000602 | -9.82408 | 3.87373 | 7.60399 | 0.07535  | -3.73025 | -13.2715 |
| Slc7a2        | NM_007514    | 0.0012   | -8.20834 | 4.3829  | 8.13314 | 0.074313 | -3.75024 | -13.4566 |
| Plxdc2        | NM_026162    | 9.48E-05 | -15.7538 | 4.25926 | 8.01896 | 0.073827 | -3.7597  | -13.5451 |
| Dnm1          | NM_010065    | 1.76E-06 | -42.9012 | 5.41765 | 9.18863 | 0.073252 | -3.77098 | -13.6514 |
| D930014E17Rik | NM_020616    | 8.95E-06 | -28.5551 | 3.53036 | 7.30502 | 0.073066 | -3.77465 | -13.6862 |
| Hoxc6         | NM_010465    | 0.000151 | -13.9913 | 4.59634 | 8.37562 | 0.072833 | -3.77927 | -13.7301 |
| Prkg1         | NM_001013833 | 1.60E-05 | -24.6914 | 4.06023 | 7.84316 | 0.072648 | -3.78294 | -13.765  |
| Fst           | NM_008046    | 2.03E-07 | -73.6828 | 4.88003 | 8.68007 | 0.071792 | -3.80004 | -13.9292 |
| Ociad2        | NM_026950    | 0.000648 | -9.64014 | 3.7579  | 7.58841 | 0.070292 | -3.83051 | -14.2265 |
| Sgcd          | NM_011891    | 4.70E-05 | -18.818  | 3.46166 | 7.29992 | 0.069915 | -3.83826 | -14.3031 |
| Npy1r         | NM_010934    | 6.36E-05 | -17.4288 | 3.13438 | 6.97731 | 0.069689 | -3.84293 | -14.3495 |
| Sned1         | NM_172463    | 1.06E-05 | -27.3686 | 5.22485 | 9.08619 | 0.068805 | -3.86134 | -14.5338 |
| Lifr          | NM_013584    | 5.50E-05 | -18.0801 | 3.69933 | 7.56478 | 0.06861  | -3.86545 | -14.5752 |
| Podn          | NM_172874    | 0.000115 | -15.0129 | 4.89906 | 8.76576 | 0.06855  | -3.8667  | -14.5879 |
| Cd82          | NM_007656    | 4.51E-06 | -33.9114 | 5.9142  | 9.80476 | 0.067426 | -3.89055 | -14.8311 |
| 1110036O03Rik | NM_176830    | 7.59E-06 | -29.7604 | 4.77492 | 8.66778 | 0.067318 | -3.89285 | -14.8548 |
| Ripk3         | NM_019955    | 3.00E-05 | -21.0739 | 5.02725 | 8.92048 | 0.067301 | -3.89323 | -14.8586 |
| Ltbp2         | NM_013589    | 0.000248 | -12.336  | 5.02895 | 8.93702 | 0.066612 | -3.90807 | -15.0123 |
| Steap4        | NM_054098    | 0.000993 | -8.62597 | 4.54338 | 8.45273 | 0.066553 | -3.90935 | -15.0256 |
| Serpine2      | NM_009255    | 0.000306 | -11.6908 | 4.51178 | 8.42716 | 0.066276 | -3.91538 | -15.0885 |
| Tnc           | NM_011607    | 0.00037  | -11.1326 | 6.46753 | 10.4051 | 0.065263 | -3.9376  | -15.3227 |
| Lphn2         | NM_001081298 | 3.91E-05 | -19.7048 | 4.68671 | 8.62967 | 0.065021 | -3.94296 | -15.3798 |
| Fam129a       | NM_022018    | 0.000476 | -10.4384 | 4.56364 | 8.51732 | 0.064539 | -3.95368 | -15.4944 |
| C4b           | NM_009780    | 0.000284 | -11.9125 | 4.47421 | 8.43203 | 0.064354 | -3.95782 | -15.539  |
| Sfrp4         | NM_016687    | 0.001201 | -8.20813 | 3.78667 | 7.75162 | 0.064037 | -3.96495 | -15.616  |
| Raet1d        | NM_020030    | 0.002151 | -7.03554 | 4.1048  | 8.11486 | 0.062066 | -4.01006 | -16.1119 |



|          |              |          |          |         |         |          |          |          |
|----------|--------------|----------|----------|---------|---------|----------|----------|----------|
| Lphn2    | NM_001081298 | 0.000227 | -12.6263 | 3.34928 | 7.37188 | 0.061529 | -4.0226  | -16.2526 |
| Stox2    | NM_001114311 | 9.17E-06 | -28.3856 | 2.94683 | 6.97402 | 0.061333 | -4.02719 | -16.3044 |
| Apod     | NM_007470    | 0.000601 | -9.82729 | 4.8985  | 8.92855 | 0.061212 | -4.03005 | -16.3367 |
| Hoxc8    | NM_010466    | 0.000156 | -13.8747 | 5.26295 | 9.3013  | 0.060861 | -4.03835 | -16.431  |
| Rab34    | NM_033475    | 3.75E-05 | -19.9167 | 5.00902 | 9.05058 | 0.060725 | -4.04157 | -16.4677 |
| Adamts9  | NM_175314    | 0.002839 | -6.53096 | 3.33354 | 7.37541 | 0.060712 | -4.04187 | -16.4711 |
| Nid1     | NM_010917    | 1.50E-05 | -25.0669 | 7.50876 | 11.5526 | 0.060627 | -4.04389 | -16.4943 |
| Tfpi     | NM_011576    | 0.000165 | -13.6945 | 4.84059 | 8.89431 | 0.060216 | -4.05372 | -16.607  |
| Ar       | NM_013476    | 0.000108 | -15.2438 | 3.32113 | 7.38851 | 0.059648 | -4.06738 | -16.765  |
| Lpl      | NM_008509    | 7.58E-05 | -16.6725 | 4.10474 | 8.17405 | 0.059568 | -4.06931 | -16.7875 |
| Decr1    | NM_026172    | 5.69E-06 | -31.9895 | 3.89356 | 7.98423 | 0.058693 | -4.09067 | -17.0379 |
| Ptgfr    | NM_008966    | 0.000112 | -15.1199 | 4.31507 | 8.419   | 0.058156 | -4.10393 | -17.1952 |
| Gtpbp10  | NM_153116    | 1.24E-05 | -26.312  | 3.54379 | 7.65141 | 0.058007 | -4.10762 | -17.2392 |
| Srpx2    | NM_026838    | 0.000872 | -8.92401 | 4.36032 | 8.47696 | 0.057646 | -4.11664 | -17.3473 |
| Gtpbp10  | NM_153116    | 2.84E-06 | -38.0806 | 3.56619 | 7.70576 | 0.056737 | -4.13957 | -17.6253 |
| Sulf2    | NM_028072    | 6.12E-05 | -17.6028 | 4.44992 | 8.59243 | 0.056621 | -4.14251 | -17.6612 |
| Cyba     | NM_007806    | 4.16E-05 | -19.4031 | 5.11797 | 9.26591 | 0.056409 | -4.14794 | -17.7278 |
| Ass1     | NM_007494    | 0.000146 | -14.1137 | 5.63652 | 9.80007 | 0.055801 | -4.16355 | -17.9207 |
| Ass1     | NM_007494    | 0.00014  | -14.2714 | 5.52356 | 9.69074 | 0.055661 | -4.16718 | -17.9658 |
| Adamts15 | NM_001024139 | 4.20E-05 | -19.3554 | 4.53409 | 8.70854 | 0.055382 | -4.17444 | -18.0565 |
| D14Abb1e | NM_001114879 | 1.13E-06 | -47.933  | 3.47297 | 7.64884 | 0.055327 | -4.17587 | -18.0744 |
| Cyp1b1   | NM_009994    | 0.00016  | -13.7939 | 4.18022 | 8.35636 | 0.055317 | -4.17614 | -18.0777 |
| Il1r1    | NM_008362    | 1.98E-05 | -23.3846 | 6.00101 | 10.1967 | 0.054572 | -4.19569 | -18.3243 |
| Atp8b1   | NM_001001488 | 5.68E-05 | -17.9342 | 3.8773  | 8.07882 | 0.054352 | -4.20152 | -18.3985 |
| Cpxm1    | NM_019696    | 0.001338 | -7.97699 | 4.72541 | 8.93058 | 0.054215 | -4.20517 | -18.4451 |
| Igsf10   | NM_001162884 | 2.33E-05 | -22.4517 | 4.44123 | 8.65199 | 0.054005 | -4.21077 | -18.5169 |
| Nt5e     | NM_011851    | 3.90E-06 | -35.1718 | 4.51859 | 8.78396 | 0.051999 | -4.26537 | -19.2311 |
| Ptges    | NM_022415    | 6.46E-05 | -17.3599 | 4.90475 | 9.17019 | 0.051997 | -4.26544 | -19.2321 |
| Uty      | NM_009484    | 1.31E-05 | -25.9614 | 3.11231 | 7.39429 | 0.051404 | -4.28198 | -19.4538 |
| Fgl2     | NM_008013    | 5.27E-07 | -58.0717 | 3.71035 | 8.02036 | 0.050415 | -4.31    | -19.8353 |
| Slc43a3  | NM_021398    | 0.000126 | -14.6608 | 4.70352 | 9.0225  | 0.050102 | -4.31898 | -19.9592 |

|               |              |          |          |         |         |          |          |          |
|---------------|--------------|----------|----------|---------|---------|----------|----------|----------|
| Dram1         | NM_027878    | 3.12E-06 | -37.1798 | 5.87372 | 10.2036 | 0.049724 | -4.32991 | -20.111  |
| Lrrc32        | NM_001113379 | 5.63E-05 | -17.9732 | 4.60298 | 8.93589 | 0.049621 | -4.33291 | -20.1528 |
| Pdgfrl        | NM_026840    | 6.62E-05 | -17.2537 | 4.33199 | 8.68803 | 0.048832 | -4.35604 | -20.4786 |
| Il1rl1        | NM_001025602 | 0.004476 | -5.77071 | 4.41429 | 8.78193 | 0.048441 | -4.36764 | -20.6439 |
| Grem2         | NM_011825    | 3.47E-05 | -20.3136 | 5.0736  | 9.45181 | 0.048087 | -4.37821 | -20.7956 |
| Gfpt2         | NM_013529    | 0.00039  | -10.9853 | 4.44715 | 8.82908 | 0.047963 | -4.38192 | -20.8492 |
| Car13         | NM_024495    | 2.04E-06 | -41.3965 | 3.65712 | 8.05364 | 0.047481 | -4.39651 | -21.0612 |
| Myh10         | NM_175260    | 8.80E-05 | -16.0536 | 4.66394 | 9.0641  | 0.047361 | -4.40016 | -21.1145 |
| Inhba         | NM_008380    | 0.000722 | -9.37109 | 4.38051 | 8.85112 | 0.045104 | -4.47062 | -22.1712 |
| Abca1         | NM_013454    | 0.000736 | -9.32447 | 4.60373 | 9.0776  | 0.045002 | -4.47387 | -22.2213 |
| Hsd17b11      | NM_053262    | 4.04E-06 | -34.8571 | 4.06677 | 8.54479 | 0.044873 | -4.47802 | -22.2853 |
| Aldh1l2       | NM_153543    | 0.00013  | -14.5384 | 4.23569 | 8.72199 | 0.044616 | -4.4863  | -22.4135 |
| Cck           | NM_031161    | 3.37E-06 | -36.4866 | 4.21468 | 8.71586 | 0.044158 | -4.50118 | -22.6459 |
| Rbp1          | NM_011254    | 5.96E-05 | -17.7214 | 5.22203 | 9.72572 | 0.044082 | -4.50368 | -22.6852 |
| Igsf10        | NM_001162884 | 2.25E-05 | -22.662  | 4.30562 | 8.81496 | 0.043909 | -4.50933 | -22.7743 |
| Agt           | NM_007428    | 2.42E-05 | -22.2372 | 5.42012 | 9.93017 | 0.043888 | -4.51005 | -22.7855 |
| Lrrc17        | NM_028977    | 1.55E-05 | -24.8746 | 5.03103 | 9.56532 | 0.043156 | -4.53429 | -23.1717 |
| Gpnmb         | NM_053110    | 0.000179 | -13.4041 | 5.10381 | 9.67144 | 0.04217  | -4.56764 | -23.7135 |
| Enpp1         | NM_008813    | 0.001394 | -7.89209 | 4.39612 | 8.97459 | 0.041855 | -4.57847 | -23.8923 |
| Ccl8          | NM_021443    | 3.31E-05 | -20.5545 | 3.55152 | 8.14096 | 0.041538 | -4.58944 | -24.0745 |
| 9030625A04Rik | BC116748     | 1.94E-07 | -74.5283 | 3.88568 | 8.48238 | 0.041329 | -4.5967  | -24.1961 |
| Rgs2          | NM_009061    | 1.07E-05 | -27.2757 | 3.18053 | 7.78879 | 0.040999 | -4.60826 | -24.3907 |
| Meg3          | NR_003633    | 1.09E-05 | -27.1988 | 5.18385 | 9.79735 | 0.040851 | -4.6135  | -24.4795 |
| Cd302         | NM_025422    | 9.07E-06 | -28.4572 | 3.5375  | 8.16455 | 0.040469 | -4.62704 | -24.7103 |
| S1pr3         | NM_010101    | 0.000398 | -10.9281 | 4.45599 | 9.08802 | 0.040329 | -4.63203 | -24.7959 |
| Pamr1         | NM_173749    | 0.000268 | -12.1001 | 4.28598 | 8.94141 | 0.039681 | -4.65543 | -25.2013 |
| Dkk3          | NM_015814    | 4.66E-05 | -18.8591 | 5.07348 | 9.73273 | 0.039575 | -4.65925 | -25.2682 |
| Cxcl5         | NM_009141    | 0.006767 | -5.14509 | 4.00192 | 8.68177 | 0.039014 | -4.67986 | -25.6317 |
| Gda           | NM_010266    | 0.000245 | -12.3772 | 4.06029 | 8.75915 | 0.038504 | -4.69886 | -25.9715 |
| Ctsk          | NM_007802    | 2.62E-05 | -21.8034 | 5.2917  | 9.99082 | 0.038497 | -4.69912 | -25.9762 |
| Cd55          | NM_010016    | 0.000267 | -12.1099 | 2.63969 | 7.34942 | 0.038215 | -4.70973 | -26.1679 |

|          |                   |          |          |         |         |          |          |          |  |
|----------|-------------------|----------|----------|---------|---------|----------|----------|----------|--|
|          | ENSMUST0000014379 |          |          |         |         |          |          |          |  |
| Bicc1    | 1                 | 6.84E-06 | -30.5447 | 4.25993 | 8.97654 | 0.038033 | -4.71661 | -26.293  |  |
| Loxl2    | NM_033325         | 4.76E-05 | -18.7556 | 4.58182 | 9.31062 | 0.037713 | -4.72881 | -26.5163 |  |
| Il1rl2   | NM_133193         | 6.62E-06 | -30.7995 | 3.4686  | 8.22975 | 0.036877 | -4.76115 | -27.1174 |  |
| Loxl1    | NM_010729         | 4.85E-07 | -59.2804 | 4.92852 | 9.71064 | 0.036345 | -4.78212 | -27.5144 |  |
| Enpp3    | NM_134005         | 0.000135 | -14.4072 | 3.70629 | 8.52374 | 0.035465 | -4.81745 | -28.1967 |  |
| Ndn      | NM_010882         | 6.41E-06 | -31.0544 | 3.98694 | 8.80678 | 0.035407 | -4.81984 | -28.2433 |  |
| Dapk1    | NM_029653         | 1.55E-05 | -24.8682 | 4.46562 | 9.30808 | 0.034856 | -4.84246 | -28.6898 |  |
| Cd34     | NM_001111059      | 0.000156 | -13.8783 | 3.85083 | 8.7207  | 0.0342   | -4.86986 | -29.2398 |  |
| Plac8    | NM_139198         | 2.00E-05 | -23.3215 | 3.97457 | 8.85866 | 0.033864 | -4.88409 | -29.5296 |  |
| Fbln1    | NM_010180         | 0.000355 | -11.2539 | 5.17859 | 10.1236 | 0.032464 | -4.94503 | -30.8037 |  |
| Rnase4   | NM_021472         | 6.22E-06 | -31.2904 | 4.84009 | 9.79385 | 0.032268 | -4.95376 | -30.9906 |  |
| Lphn2    | NM_001081298      | 6.31E-06 | -31.1685 | 4.21704 | 9.17218 | 0.032237 | -4.95514 | -31.0202 |  |
| Mgp      | NM_008597         | 0.000189 | -13.2238 | 6.20066 | 11.1595 | 0.032154 | -4.95886 | -31.1005 |  |
| Gria3    | NM_016886         | 2.59E-05 | -21.8586 | 3.43232 | 8.3914  | 0.032149 | -4.95908 | -31.105  |  |
|          | ENSMUST0000009767 |          |          |         |         |          |          |          |  |
| Gm10554  | 4                 | 8.25E-06 | -29.1484 | 2.96903 | 7.95751 | 0.031501 | -4.98848 | -31.7454 |  |
| Fkbp10   | NM_010221         | 5.83E-07 | -56.6012 | 4.87181 | 9.86559 | 0.031385 | -4.99378 | -31.8623 |  |
| Gpm6b    | NM_001177956      | 5.73E-05 | -17.8978 | 4.55267 | 9.56556 | 0.030972 | -5.01289 | -32.2872 |  |
| Igsf10   | NM_001162884      | 3.05E-05 | -20.9754 | 3.80947 | 8.82638 | 0.030886 | -5.01692 | -32.3774 |  |
| Grb10    | NM_010345         | 0.000138 | -14.3307 | 4.34158 | 9.36213 | 0.030808 | -5.02055 | -32.459  |  |
| Slit3    | NM_011412         | 2.91E-06 | -37.8576 | 4.89236 | 9.92624 | 0.030525 | -5.03388 | -32.7604 |  |
| Bicc1    | NM_031397         | 1.21E-05 | -26.4958 | 4.40165 | 9.50734 | 0.029043 | -5.10569 | -34.4323 |  |
| Ednra    | NM_010332         | 0.000142 | -14.2275 | 4.5362  | 9.6452  | 0.028976 | -5.109   | -34.5113 |  |
| Efemp1   | NM_146015         | 0.000179 | -13.4112 | 5.018   | 10.2194 | 0.027179 | -5.20136 | -36.7931 |  |
| Bgn      | NM_007542         | 5.38E-07 | -57.751  | 7.16352 | 12.374  | 0.027008 | -5.21047 | -37.0261 |  |
| Rgs4     | NM_009062         | 4.52E-05 | -18.9957 | 4.03814 | 9.26327 | 0.026735 | -5.22513 | -37.4042 |  |
| Lphn2    | NM_001081298      | 2.11E-06 | -41.0469 | 3.99005 | 9.22236 | 0.026602 | -5.23231 | -37.5909 |  |
| AF357355 | NR_028433         | 4.27E-06 | -34.3806 | 3.84803 | 9.086   | 0.026498 | -5.23797 | -37.7387 |  |
| Matn2    | NM_016762         | 9.85E-06 | -27.8769 | 4.92097 | 10.1698 | 0.0263   | -5.24879 | -38.0228 |  |
| Cxcl12   | NM_001012477      | 0.000102 | -15.4785 | 4.52963 | 9.7975  | 0.025954 | -5.26788 | -38.5291 |  |
| Il33     | NM_001164724      | 0.00086  | -8.95438 | 4.16128 | 9.43478 | 0.025853 | -5.2735  | -38.6797 |  |

|               |              |          |          |         |         |          |          |          |
|---------------|--------------|----------|----------|---------|---------|----------|----------|----------|
| Pla2g4a       | NM_008869    | 1.16E-06 | -47.625  | 4.07512 | 9.38048 | 0.025289 | -5.30535 | -39.5431 |
| Apoe          | NM_009696    | 2.75E-06 | -38.4033 | 6.8293  | 12.1701 | 0.024676 | -5.34077 | -40.5259 |
| Eif2s3y       | NM_012011    | 1.72E-06 | -43.1785 | 3.13961 | 8.5366  | 0.023733 | -5.39699 | -42.1361 |
| Tgfb1         | NM_009369    | 1.61E-05 | -24.6421 | 5.09706 | 10.5262 | 0.023209 | -5.42915 | -43.0862 |
| Mmp3          | NM_010809    | 0.000394 | -10.9569 | 5.04891 | 10.5016 | 0.022833 | -5.45273 | -43.796  |
| Fbn1          | NM_007993    | 3.39E-06 | -36.4186 | 4.62519 | 10.0801 | 0.022798 | -5.45495 | -43.8637 |
| Adamts5       | NM_011782    | 2.97E-05 | -21.1306 | 3.69062 | 9.22945 | 0.02151  | -5.53884 | -46.4897 |
| Mmp2          | NM_008610    | 1.77E-06 | -42.896  | 6.89646 | 12.4673 | 0.021038 | -5.57085 | -47.5326 |
| Kcne4         | NM_021342    | 2.66E-05 | -21.725  | 4.32018 | 9.90044 | 0.020901 | -5.58027 | -47.844  |
| Thy1          | NM_009382    | 9.12E-06 | -28.4228 | 5.35114 | 10.9552 | 0.02056  | -5.60402 | -48.6383 |
| Fibin         | NM_026271    | 1.79E-05 | -23.9817 | 4.28771 | 9.89573 | 0.020503 | -5.60802 | -48.7733 |
| Scp2          | NM_011327    | 3.21E-05 | -20.7106 | 3.92651 | 9.54717 | 0.020324 | -5.62066 | -49.2025 |
| Cyp7b1        | NM_007825    | 1.91E-05 | -23.5922 | 3.80515 | 9.43186 | 0.020239 | -5.62671 | -49.4094 |
| Cdh11         | NM_009866    | 2.09E-06 | -41.1017 | 4.39748 | 10.0305 | 0.02015  | -5.63305 | -49.6268 |
| Sulf1         | NM_001198565 | 5.75E-05 | -17.8793 | 4.12815 | 9.80835 | 0.019503 | -5.6802  | -51.2756 |
| Nrn1          | NM_153529    | 2.03E-06 | -41.4027 | 4.04859 | 9.77714 | 0.01886  | -5.72855 | -53.0231 |
| Ccdc80        | NM_026439    | 1.25E-05 | -26.2581 | 5.0406  | 10.8025 | 0.018429 | -5.76191 | -54.2636 |
| Gas6          | NM_019521    | 1.62E-06 | -43.8047 | 5.29211 | 11.0602 | 0.01835  | -5.76805 | -54.4951 |
| Cav1          | NM_007616    | 1.42E-07 | -80.5333 | 3.79276 | 9.57102 | 0.018221 | -5.77826 | -54.8821 |
| Igf1          | NM_010512    | 1.00E-05 | -27.7489 | 4.27461 | 10.1116 | 0.017494 | -5.83701 | -57.1629 |
| Has2          | NM_008216    | 3.91E-05 | -19.7021 | 4.0408  | 9.92159 | 0.016971 | -5.88079 | -58.9244 |
| Il13ra1       | NM_133990    | 8.35E-05 | -16.2697 | 3.43319 | 9.36041 | 0.016434 | -5.92722 | -60.8513 |
| Tmem45a       | NM_019631    | 1.54E-05 | -24.9143 | 3.63748 | 9.57398 | 0.016328 | -5.9365  | -61.2444 |
| Prrx1         | NM_175686    | 3.39E-06 | -36.423  | 4.44543 | 10.501  | 0.015034 | -6.05561 | -66.5152 |
| Lama4         | NM_010681    | 1.01E-06 | -49.2923 | 4.17311 | 10.2368 | 0.01495  | -6.0637  | -66.8891 |
| Ddx3y         | NM_012008    | 2.00E-07 | -73.9511 | 3.74352 | 9.80847 | 0.014937 | -6.06495 | -66.9473 |
| 9030425E11Rik | NM_133733    | 4.49E-07 | -60.4461 | 3.9171  | 9.98987 | 0.014856 | -6.07277 | -67.3111 |
| Pdpn          | NM_010329    | 0.000114 | -15.0399 | 4.81231 | 10.9744 | 0.013965 | -6.16205 | -71.6083 |
| Pi15          | NM_053191    | 6.47E-05 | -17.3542 | 3.53525 | 9.79539 | 0.013047 | -6.26014 | -76.6458 |
| A430107O13Rik | BC151018     | 8.79E-07 | -51.0831 | 4.1562  | 10.4306 | 0.012919 | -6.27442 | -77.4083 |
| Lox           | NM_010728    | 1.86E-07 | -75.3571 | 3.77906 | 10.1441 | 0.012132 | -6.36501 | -82.425  |

|               |                  |                 |                 |                |                |                 |                 |                 |
|---------------|------------------|-----------------|-----------------|----------------|----------------|-----------------|-----------------|-----------------|
| Fgf7          | NM_008008        | 2.46E-05        | -22.1473        | 4.9176         | 11.3487        | 0.011589        | -6.43115        | -86.2915        |
| Hgf           | NM_010427        | 2.73E-05        | -21.5717        | 3.73417        | 10.1825        | 0.011451        | -6.44835        | -87.3267        |
| Abi3bp        | NM_001014423     | 1.96E-06        | -41.8048        | 3.76887        | 10.2219        | 0.011414        | -6.45307        | -87.6128        |
| Gem           | NM_010276        | 3.81E-07        | -62.9843        | 4.55526        | 11.0189        | 0.011331        | -6.4636         | -88.2545        |
| Pros1         | NM_011173        | 4.62E-05        | -18.8988        | 3.53465        | 10.0614        | 0.010846        | -6.52675        | -92.2033        |
| Colec12       | NM_130449        | 1.21E-05        | -26.4977        | 4.45377        | 11.0495        | 0.010339        | -6.5957         | -96.7173        |
| Pde7b         | NM_013875        | 4.65E-06        | -33.6501        | 4.01712        | 10.6545        | 0.010045        | -6.63735        | -99.5497        |
| Vcan          | NM_001081249     | 8.68E-08        | -91.1507        | 4.42159        | 11.0864        | 0.009856        | -6.66481        | -101.463        |
| Aspn          | NM_025711        | 3.34E-05        | -20.4991        | 3.4791         | 10.1871        | 0.009565        | -6.70801        | -104.547        |
| Grem1         | NM_011824        | 1.62E-07        | -78.02          | 4.78704        | 11.5117        | 0.009455        | -6.72464        | -105.759        |
| <b>Pdgfra</b> | <b>NM_011058</b> | <b>3.03E-06</b> | <b>-37.4651</b> | <b>4.42145</b> | <b>11.2009</b> | <b>0.009103</b> | <b>-6.77946</b> | <b>-109.855</b> |
| Osmr          | NM_011019        | 4.15E-06        | -34.6346        | 3.65241        | 10.5014        | 0.008675        | -6.84895        | -115.276        |
| Lum           | NM_008524        | 2.62E-06        | -38.8457        | 3.18866        | 10.2186        | 0.007652        | -7.02995        | -130.685        |
| Emb           | NM_010330        | 7.13E-05        | -16.931         | 3.72146        | 10.8922        | 0.00694         | -7.17076        | -144.083        |
| Sfrp1         | NM_013834        | 2.45E-06        | -39.5166        | 4.03213        | 11.557         | 0.00543         | -7.52487        | -184.167        |
| Saa3          | NM_011315        | 6.35E-06        | -31.1196        | 4.4165         | 12.0401        | 0.005071        | -7.62362        | -197.215        |
| Dpt           | NM_019759        | 2.32E-06        | -40.0563        | 3.9402         | 12.1019        | 0.003492        | -8.16171        | -286.364        |
| Ptn           | NM_008973        | 1.90E-06        | -42.1307        | 3.78246        | 11.9542        | 0.003468        | -8.17179        | -288.373        |
| Serpina3n     | NM_009252        | 1.15E-07        | -85.0159        | 4.05706        | 12.5826        | 0.002714        | -8.5255         | -368.495        |
| Dcn           | NM_007833        | 3.48E-09        | -203.779        | 4.31823        | 13.0228        | 0.002397        | -8.70462        | -417.207        |
